# Supplementary material for: RecQ mediated genome instability 2 (RMI2): a potential prognostic and immunological biomarker for pan-cancers
Source: Aging (Albany NY). 2022 May 12;14(9):4107–36. doi: 10.18632/aging.204076 (PMC9134953; doi:10.18632/aging.204076)
Supplement: Supplementary Table 1 [file aging-14-204076-s002.xls]

## Sheet: Table1
Supplementary Table 1. RMI2 expression levels of 33 cancer types and all patient samples in TCGA database.
Id	RMI2	Type	CancerType
TCGA-OR-A5JP-01A	2.5714	Tumor	ACC
TCGA-OR-A5JG-01A	4.11164	Tumor	ACC
TCGA-OR-A5LG-01A	2.36693	Tumor	ACC
TCGA-OR-A5JR-01A	1.78431	Tumor	ACC
TCGA-OR-A5KU-01A	1.52939	Tumor	ACC
TCGA-OR-A5LS-01A	2.84026	Tumor	ACC
TCGA-OR-A5L9-01A	0.856524	Tumor	ACC
TCGA-OR-A5JQ-01A	3.38399	Tumor	ACC
TCGA-OR-A5K4-01A	2.86356	Tumor	ACC
TCGA-OR-A5JL-01A	3.56176	Tumor	ACC
TCGA-OR-A5LC-01A	3.8263	Tumor	ACC
TCGA-OR-A5K2-01A	3.504	Tumor	ACC
TCGA-P6-A5OG-01A	3.40521	Tumor	ACC
TCGA-OR-A5JW-01A	2.39281	Tumor	ACC
TCGA-OR-A5KO-01A	5.49147	Tumor	ACC
TCGA-OR-A5J8-01A	3.38169	Tumor	ACC
TCGA-PA-A5YG-01A	1.10239	Tumor	ACC
TCGA-OR-A5KV-01A	2.79814	Tumor	ACC
TCGA-OR-A5L4-01A	2.5332	Tumor	ACC
TCGA-OR-A5KX-01A	3.3072	Tumor	ACC
TCGA-OR-A5L8-01A	2.33413	Tumor	ACC
TCGA-OR-A5JO-01A	1.61754	Tumor	ACC
TCGA-OR-A5JA-01A	4.48084	Tumor	ACC
TCGA-OR-A5LO-01A	3.12641	Tumor	ACC
TCGA-OR-A5JM-01A	3.89374	Tumor	ACC
TCGA-OR-A5JV-01A	1.95329	Tumor	ACC
TCGA-OR-A5JB-01A	3.35536	Tumor	ACC
TCGA-OR-A5LA-01A	1.21804	Tumor	ACC
TCGA-OR-A5JE-01A	3.88551	Tumor	ACC
TCGA-OR-A5JZ-01A	2.50791	Tumor	ACC
TCGA-OR-A5KT-01A	1.31058	Tumor	ACC
TCGA-OR-A5KZ-01A	4.05374	Tumor	ACC
TCGA-OR-A5LJ-01A	3.16014	Tumor	ACC
TCGA-OR-A5LB-01A	3.30882	Tumor	ACC
TCGA-OR-A5LT-01A	2.40446	Tumor	ACC
TCGA-OR-A5LD-01A	3.66553	Tumor	ACC
TCGA-OR-A5J2-01A	1.72463	Tumor	ACC
TCGA-PK-A5HB-01A	3.28439	Tumor	ACC
TCGA-OR-A5JS-01A	3.98676	Tumor	ACC
TCGA-OR-A5K6-01A	2.20534	Tumor	ACC
TCGA-OR-A5JY-01A	3.65644	Tumor	ACC
TCGA-OR-A5JT-01A	1.82098	Tumor	ACC
TCGA-PK-A5H8-01A	4.02702	Tumor	ACC
TCGA-OR-A5JX-01A	1.18074	Tumor	ACC
TCGA-OR-A5LK-01A	0.525846	Tumor	ACC
TCGA-P6-A5OF-01A	2.64875	Tumor	ACC
TCGA-OR-A5JI-01A	1.52849	Tumor	ACC
TCGA-OR-A5K5-01A	3.80117	Tumor	ACC
TCGA-OR-A5JC-01A	2.36125	Tumor	ACC
TCGA-OR-A5KW-01A	3.05297	Tumor	ACC
TCGA-OR-A5JJ-01A	4.5367	Tumor	ACC
TCGA-OR-A5JD-01A	1.00213	Tumor	ACC
TCGA-OR-A5LM-01A	2.70173	Tumor	ACC
TCGA-PK-A5HA-01A	1.41325	Tumor	ACC
TCGA-OR-A5JF-01A	2.71263	Tumor	ACC
TCGA-OR-A5LH-01A	2.07331	Tumor	ACC
TCGA-OR-A5K1-01A	2.80382	Tumor	ACC
TCGA-OR-A5LN-01A	0.590866	Tumor	ACC
TCGA-OR-A5LE-01A	4.41534	Tumor	ACC
TCGA-OR-A5L3-01A	0.885103	Tumor	ACC
TCGA-OU-A5PI-01A	3.13138	Tumor	ACC
TCGA-OR-A5K8-01A	2.75578	Tumor	ACC
TCGA-OR-A5K0-01A	2.6002	Tumor	ACC
TCGA-OR-A5KY-01A	3.10829	Tumor	ACC
TCGA-OR-A5J9-01A	2.73408	Tumor	ACC
TCGA-OR-A5J1-01A	2.55386	Tumor	ACC
TCGA-OR-A5J5-01A	3.34408	Tumor	ACC
TCGA-OR-A5L6-01A	3.32978	Tumor	ACC
TCGA-OR-A5LP-01A	1.04204	Tumor	ACC
TCGA-OR-A5K9-01A	3.12572	Tumor	ACC
TCGA-OR-A5J7-01A	3.07838	Tumor	ACC
TCGA-PK-A5H9-01A	1.43344	Tumor	ACC
TCGA-OR-A5LR-01A	2.40592	Tumor	ACC
TCGA-OR-A5JK-01A	2.26923	Tumor	ACC
TCGA-OR-A5J6-01A	1.99275	Tumor	ACC
TCGA-OR-A5LL-01A	1.15306	Tumor	ACC
TCGA-OR-A5K3-01A	1.55198	Tumor	ACC
TCGA-OR-A5J3-01A	2.18484	Tumor	ACC
TCGA-OR-A5L5-01A	1.46203	Tumor	ACC
TCGA-FD-A3SS-01A	5.07109	Tumor	BLCA
TCGA-FD-A43S-01A	2.89458	Tumor	BLCA
TCGA-UY-A78K-01A	4.27909	Tumor	BLCA
TCGA-DK-A2HX-01A	3.7555	Tumor	BLCA
TCGA-DK-A1A3-01A	2.0935	Tumor	BLCA
TCGA-GC-A6I3-01A	3.5389	Tumor	BLCA
TCGA-XF-AAMJ-01A	2.63241	Tumor	BLCA
TCGA-GC-A6I1-01A	2.5422	Tumor	BLCA
TCGA-ZF-A9RL-01A	3.0909	Tumor	BLCA
TCGA-DK-A3IL-01A	4.79598	Tumor	BLCA
TCGA-E7-A6MF-01A	2.14849	Tumor	BLCA
TCGA-BT-A20R-01A	3.77474	Tumor	BLCA
TCGA-H4-A2HQ-01A	3.61503	Tumor	BLCA
TCGA-GV-A3QH-01A	3.31197	Tumor	BLCA
TCGA-4Z-AA82-01A	3.75836	Tumor	BLCA
TCGA-E7-A4XJ-01A	2.62544	Tumor	BLCA
TCGA-XF-A8HE-01A	2.77324	Tumor	BLCA
TCGA-XF-A9T0-01A	3.14573	Tumor	BLCA
TCGA-FD-A5BT-01A	3.26402	Tumor	BLCA
TCGA-FD-A3SN-01A	3.4313	Tumor	BLCA
TCGA-G2-AA3C-01A	3.0198	Tumor	BLCA
TCGA-HQ-A2OE-01A	3.30522	Tumor	BLCA
TCGA-BL-A3JM-01A	3.06375	Tumor	BLCA
TCGA-XF-AAN3-01A	1.37346	Tumor	BLCA
TCGA-FD-A3SR-01A	3.48059	Tumor	BLCA
TCGA-4Z-AA89-01A	2.81274	Tumor	BLCA
TCGA-G2-A2EO-01A	3.9131	Tumor	BLCA
TCGA-ZF-AA5H-01A	3.08599	Tumor	BLCA
TCGA-BT-A20V-01A	5.05485	Tumor	BLCA
TCGA-GC-A3WC-01A	3.28524	Tumor	BLCA
TCGA-GV-A3JV-01A	3.45871	Tumor	BLCA
TCGA-YF-AA3M-01A	3.0901	Tumor	BLCA
TCGA-FD-A3B5-01A	3.01503	Tumor	BLCA
TCGA-BT-A20Q-11A	0.623774	Normal	BLCA
TCGA-CF-A47V-01A	1.93147	Tumor	BLCA
TCGA-GU-A42P-01A	4.21132	Tumor	BLCA
TCGA-BT-A20T-01A	2.47126	Tumor	BLCA
TCGA-GC-A3BM-11A	1.69097	Normal	BLCA
TCGA-XF-AAN0-01A	2.95253	Tumor	BLCA
TCGA-E7-A7DV-01A	3.37158	Tumor	BLCA
TCGA-GV-A40E-01A	3.51308	Tumor	BLCA
TCGA-FJ-A3Z9-01A	3.53586	Tumor	BLCA
TCGA-XF-A9ST-01A	3.68283	Tumor	BLCA
TCGA-FJ-A3ZF-01A	3.34644	Tumor	BLCA
TCGA-K4-A3WV-11A	2.58427	Normal	BLCA
TCGA-YC-A89H-01A	3.48271	Tumor	BLCA
TCGA-CF-A9FM-01A	2.23601	Tumor	BLCA
TCGA-DK-A1AD-01A	3.69211	Tumor	BLCA
TCGA-G2-A2EK-01A	2.60026	Tumor	BLCA
TCGA-E5-A2PC-01A	3.75303	Tumor	BLCA
TCGA-C4-A0F1-01A	2.50732	Tumor	BLCA
TCGA-FD-A43N-01A	2.04669	Tumor	BLCA
TCGA-BL-A13J-01A	2.25835	Tumor	BLCA
TCGA-FD-A3SO-01A	3.91431	Tumor	BLCA
TCGA-XF-A8HD-01A	4.28985	Tumor	BLCA
TCGA-BT-A20X-01A	2.27678	Tumor	BLCA
TCGA-ZF-AA52-01A	4.36904	Tumor	BLCA
TCGA-DK-AA76-01A	2.47698	Tumor	BLCA
TCGA-GV-A3JW-01A	3.77018	Tumor	BLCA
TCGA-FD-A3N6-01A	2.66441	Tumor	BLCA
TCGA-BT-A2LA-11A	3.59513	Normal	BLCA
TCGA-CU-A5W6-01A	2.75586	Tumor	BLCA
TCGA-DK-A2I4-01A	3.06977	Tumor	BLCA
TCGA-DK-AA6M-01A	2.81611	Tumor	BLCA
TCGA-4Z-AA7Y-01A	2.74918	Tumor	BLCA
TCGA-DK-A3WY-01A	4.43453	Tumor	BLCA
TCGA-E7-A3X6-01A	3.38136	Tumor	BLCA
TCGA-K4-A3WV-01A	3.03757	Tumor	BLCA
TCGA-DK-A3IQ-01A	1.50938	Tumor	BLCA
TCGA-ZF-AA56-01A	3.01089	Tumor	BLCA
TCGA-CU-A3QU-01A	6.03585	Tumor	BLCA
TCGA-FD-A6TI-01A	2.2224	Tumor	BLCA
TCGA-XF-A9T3-01A	3.54411	Tumor	BLCA
TCGA-FD-A3B3-01A	2.18986	Tumor	BLCA
TCGA-BT-A20U-11A	2.14671	Normal	BLCA
TCGA-YF-AA3L-01A	3.77389	Tumor	BLCA
TCGA-K4-A54R-11A	1.20195	Normal	BLCA
TCGA-SY-A9G0-01A	1.66632	Tumor	BLCA
TCGA-ZF-A9R2-01A	2.02539	Tumor	BLCA
TCGA-GU-AATQ-01A	3.61748	Tumor	BLCA
TCGA-FD-A5C1-01A	3.27723	Tumor	BLCA
TCGA-DK-A2I1-01A	3.38308	Tumor	BLCA
TCGA-CF-A5U8-01A	2.42654	Tumor	BLCA
TCGA-UY-A9PB-01A	3.29187	Tumor	BLCA
TCGA-DK-A3X1-01A	3.87752	Tumor	BLCA
TCGA-DK-A1AC-01A	2.95229	Tumor	BLCA
TCGA-FD-A62N-01A	2.66716	Tumor	BLCA
TCGA-DK-AA75-01A	3.97511	Tumor	BLCA
TCGA-XF-A9SL-01A	2.84769	Tumor	BLCA
TCGA-XF-A9T4-01A	2.15753	Tumor	BLCA
TCGA-XF-AAN2-01A	3.65691	Tumor	BLCA
TCGA-BT-A2LD-01A	3.06707	Tumor	BLCA
TCGA-BT-A20N-11A	0.471609	Normal	BLCA
TCGA-ZF-A9R1-01A	3.0356	Tumor	BLCA
TCGA-ZF-A9R9-01A	2.66584	Tumor	BLCA
TCGA-DK-A6AV-01A	3.00761	Tumor	BLCA
TCGA-XF-AAMY-01A	2.64898	Tumor	BLCA
TCGA-GU-A763-01A	3.06218	Tumor	BLCA
TCGA-FD-A3B7-01A	3.66109	Tumor	BLCA
TCGA-FD-A3NA-01A	6.24158	Tumor	BLCA
TCGA-CF-A47T-01A	2.93572	Tumor	BLCA
TCGA-CU-A0YN-11A	2.26529	Normal	BLCA
TCGA-BT-A0S7-01A	3.27305	Tumor	BLCA
TCGA-GC-A3BM-01A	2.64591	Tumor	BLCA
TCGA-GD-A3OP-01A	2.61501	Tumor	BLCA
TCGA-SY-A9G5-01A	3.42881	Tumor	BLCA
TCGA-KQ-A41S-01A	3.4924	Tumor	BLCA
TCGA-4Z-AA7M-01A	3.68646	Tumor	BLCA
TCGA-FD-A3SJ-01A	3.70702	Tumor	BLCA
TCGA-E7-A677-01A	2.83131	Tumor	BLCA
TCGA-UY-A8OD-01A	3.06982	Tumor	BLCA
TCGA-DK-AA6L-01A	4.26897	Tumor	BLCA
TCGA-GD-A2C5-01A	3.94149	Tumor	BLCA
TCGA-K4-A4AC-01A	2.89671	Tumor	BLCA
TCGA-FD-A62O-01A	2.71235	Tumor	BLCA
TCGA-BT-A2LB-01A	2.89843	Tumor	BLCA
TCGA-FD-A3N5-01A	3.20217	Tumor	BLCA
TCGA-G2-A3VY-01A	3.62112	Tumor	BLCA
TCGA-DK-A1AA-01A	2.1576	Tumor	BLCA
TCGA-XF-A9SY-01A	3.14877	Tumor	BLCA
TCGA-DK-AA6Q-01A	2.92722	Tumor	BLCA
TCGA-G2-A2EL-01A	3.36728	Tumor	BLCA
TCGA-E7-A6ME-01A	6.81267	Tumor	BLCA
TCGA-HQ-A2OF-01A	4.63766	Tumor	BLCA
TCGA-FD-A6TF-01A	4.53945	Tumor	BLCA
TCGA-FD-A3SP-01A	1.9397	Tumor	BLCA
TCGA-BT-A20P-01A	2.71627	Tumor	BLCA
TCGA-GV-A40G-01A	4.172	Tumor	BLCA
TCGA-CF-A47S-01A	2.2812	Tumor	BLCA
TCGA-XF-A9T2-01A	3.55629	Tumor	BLCA
TCGA-CF-A9FH-01A	2.8341	Tumor	BLCA
TCGA-ZF-AA4X-01A	4.33786	Tumor	BLCA
TCGA-XF-AAMQ-01A	3.30633	Tumor	BLCA
TCGA-CF-A3MH-01A	2.7816	Tumor	BLCA
TCGA-DK-AA6W-01A	3.97907	Tumor	BLCA
TCGA-KQ-A41O-01A	2.74258	Tumor	BLCA
TCGA-FJ-A3Z7-01A	1.48344	Tumor	BLCA
TCGA-S5-AA26-01A	3.40026	Tumor	BLCA
TCGA-FD-A3B4-01A	4.22542	Tumor	BLCA
TCGA-GC-A3OO-01A	3.85835	Tumor	BLCA
TCGA-XF-A9SP-01A	2.69277	Tumor	BLCA
TCGA-FD-A3SL-01A	4.27076	Tumor	BLCA
TCGA-FD-A6TB-01A	3.8301	Tumor	BLCA
TCGA-FD-A6TA-01A	2.63744	Tumor	BLCA
TCGA-XF-A8HB-01A	4.42593	Tumor	BLCA
TCGA-UY-A8OB-01A	3.43997	Tumor	BLCA
TCGA-GU-A767-01A	2.95964	Tumor	BLCA
TCGA-FD-A43U-01A	3.43457	Tumor	BLCA
TCGA-DK-AA6T-01A	3.83798	Tumor	BLCA
TCGA-5N-A9KI-01A	4.88152	Tumor	BLCA
TCGA-XF-A8HF-01A	3.65217	Tumor	BLCA
TCGA-UY-A78L-01A	3.70937	Tumor	BLCA
TCGA-FD-A5C0-01A	4.53655	Tumor	BLCA
TCGA-UY-A9PE-01A	3.10696	Tumor	BLCA
TCGA-K4-A6FZ-01A	2.6257	Tumor	BLCA
TCGA-DK-A3IK-01A	2.71175	Tumor	BLCA
TCGA-LC-A66R-01A	5.32645	Tumor	BLCA
TCGA-GU-A762-01A	3.22504	Tumor	BLCA
TCGA-BT-A2LB-11A	1.6858	Normal	BLCA
TCGA-4Z-AA7O-01A	3.7981	Tumor	BLCA
TCGA-DK-A6B5-01A	4.67115	Tumor	BLCA
TCGA-C4-A0F0-01A	2.35323	Tumor	BLCA
TCGA-UY-A78N-01A	3.22325	Tumor	BLCA
TCGA-G2-AA3F-01A	3.30124	Tumor	BLCA
TCGA-ZF-AA53-01A	2.32958	Tumor	BLCA
TCGA-LT-A8JT-01A	3.07581	Tumor	BLCA
TCGA-XF-A8HI-01A	2.82625	Tumor	BLCA
TCGA-FJ-A3ZE-01A	3.84229	Tumor	BLCA
TCGA-FD-A3SM-01A	1.97831	Tumor	BLCA
TCGA-DK-AA6X-01A	4.17331	Tumor	BLCA
TCGA-XF-A9SJ-01A	4.43772	Tumor	BLCA
TCGA-CF-A7I0-01A	2.05604	Tumor	BLCA
TCGA-GD-A3OQ-01A	3.61825	Tumor	BLCA
TCGA-CU-A0YO-01A	2.49996	Tumor	BLCA
TCGA-DK-AA71-01A	3.38504	Tumor	BLCA
TCGA-CF-A9FL-01A	2.05123	Tumor	BLCA
TCGA-ZF-AA5N-01A	1.98697	Tumor	BLCA
TCGA-UY-A9PF-01A	2.64335	Tumor	BLCA
TCGA-UY-A78P-01A	3.6942	Tumor	BLCA
TCGA-CF-A1HR-01A	3.84737	Tumor	BLCA
TCGA-DK-A3IN-01A	5.39432	Tumor	BLCA
TCGA-UY-A9PH-01A	5.02841	Tumor	BLCA
TCGA-GD-A76B-01A	3.88717	Tumor	BLCA
TCGA-ZF-AA58-01A	3.38002	Tumor	BLCA
TCGA-ZF-AA4V-01A	5.51463	Tumor	BLCA
TCGA-DK-AA6R-01A	3.5538	Tumor	BLCA
TCGA-FT-A61P-01A	3.35684	Tumor	BLCA
TCGA-2F-A9KQ-01A	2.34891	Tumor	BLCA
TCGA-K4-A54R-01A	3.7643	Tumor	BLCA
TCGA-FD-A62S-01A	3.23053	Tumor	BLCA
TCGA-ZF-A9R3-01A	2.68321	Tumor	BLCA
TCGA-BT-A42F-01A	2.42779	Tumor	BLCA
TCGA-K4-A83P-01A	2.43945	Tumor	BLCA
TCGA-K4-A5RJ-01A	3.07018	Tumor	BLCA
TCGA-XF-A9SX-01A	3.31675	Tumor	BLCA
TCGA-KQ-A41N-01A	3.96021	Tumor	BLCA
TCGA-DK-A1AE-01A	3.2437	Tumor	BLCA
TCGA-DK-A3WX-01A	2.51691	Tumor	BLCA
TCGA-DK-A3WW-01A	2.41122	Tumor	BLCA
TCGA-XF-A9SK-01A	2.86965	Tumor	BLCA
TCGA-KQ-A41R-01A	1.25067	Tumor	BLCA
TCGA-CF-A3MG-01A	3.12523	Tumor	BLCA
TCGA-CU-A0YR-01A	3.07824	Tumor	BLCA
TCGA-UY-A78M-01A	2.23482	Tumor	BLCA
TCGA-CF-A5UA-01A	3.4118	Tumor	BLCA
TCGA-ZF-A9RN-01A	4.24301	Tumor	BLCA
TCGA-4Z-AA81-01A	3.86576	Tumor	BLCA
TCGA-E7-A8O8-01A	2.721	Tumor	BLCA
TCGA-BL-A0C8-01B	2.89616	Tumor	BLCA
TCGA-GC-A3RB-01A	3.43423	Tumor	BLCA
TCGA-BT-A20O-01A	2.89425	Tumor	BLCA
TCGA-G2-A2ES-01A	3.07015	Tumor	BLCA
TCGA-DK-AA6P-01A	3.10581	Tumor	BLCA
TCGA-FD-A43P-01A	4.19418	Tumor	BLCA
TCGA-2F-A9KT-01A	3.20753	Tumor	BLCA
TCGA-CF-A9FF-01A	3.21255	Tumor	BLCA
TCGA-UY-A9PA-01A	2.96488	Tumor	BLCA
TCGA-E7-A7DU-01A	3.60336	Tumor	BLCA
TCGA-2F-A9KW-01A	4.75309	Tumor	BLCA
TCGA-4Z-AA87-01A	4.80682	Tumor	BLCA
TCGA-GU-A42Q-01A	3.82688	Tumor	BLCA
TCGA-E7-A97P-01A	2.22629	Tumor	BLCA
TCGA-XF-AAMG-01A	4.52739	Tumor	BLCA
TCGA-BT-A3PH-01A	2.73065	Tumor	BLCA
TCGA-ZF-AA4R-01A	4.66042	Tumor	BLCA
TCGA-ZF-AA5P-01A	2.49607	Tumor	BLCA
TCGA-DK-A3X2-01A	2.59919	Tumor	BLCA
TCGA-YC-A8S6-01A	2.15402	Tumor	BLCA
TCGA-K4-A4AB-01B	2.04795	Tumor	BLCA
TCGA-GC-A3RC-01A	2.27581	Tumor	BLCA
TCGA-BL-A0C8-01A	2.94007	Tumor	BLCA
TCGA-GU-AATP-01A	3.75351	Tumor	BLCA
TCGA-CF-A1HS-01A	3.44689	Tumor	BLCA
TCGA-ZF-AA4U-01A	2.26662	Tumor	BLCA
TCGA-GV-A3QF-01A	2.85512	Tumor	BLCA
TCGA-GC-A4ZW-01A	6.30526	Tumor	BLCA
TCGA-ZF-A9RD-01A	3.63581	Tumor	BLCA
TCGA-GU-A766-01A	4.52849	Tumor	BLCA
TCGA-G2-A2EF-01A	2.13793	Tumor	BLCA
TCGA-FD-A5BY-01A	4.70744	Tumor	BLCA
TCGA-CF-A8HX-01A	3.08789	Tumor	BLCA
TCGA-GV-A6ZA-01A	4.04145	Tumor	BLCA
TCGA-DK-A1A5-01A	3.6541	Tumor	BLCA
TCGA-4Z-AA7N-01A	1.90016	Tumor	BLCA
TCGA-GC-A3RD-01A	2.91105	Tumor	BLCA
TCGA-G2-A3IE-01A	3.73478	Tumor	BLCA
TCGA-FD-A5BZ-01A	3.1617	Tumor	BLCA
TCGA-BT-A3PJ-01A	2.96006	Tumor	BLCA
TCGA-CU-A72E-01A	2.91185	Tumor	BLCA
TCGA-ZF-A9RM-01A	4.10404	Tumor	BLCA
TCGA-FD-A6TH-01A	2.6182	Tumor	BLCA
TCGA-GD-A3OS-01A	2.55378	Tumor	BLCA
TCGA-DK-A3IS-01A	3.89756	Tumor	BLCA
TCGA-K4-A3WS-01A	3.62583	Tumor	BLCA
TCGA-GD-A2C5-11A	2.95376	Normal	BLCA
TCGA-4Z-AA7R-01A	4.07388	Tumor	BLCA
TCGA-DK-A6B1-01A	6.00791	Tumor	BLCA
TCGA-GV-A3QI-01A	4.67823	Tumor	BLCA
TCGA-DK-A6AW-01A	1.76373	Tumor	BLCA
TCGA-BT-A20W-01A	3.39015	Tumor	BLCA
TCGA-DK-A3IU-01A	3.27842	Tumor	BLCA
TCGA-K4-A5RI-11A	1.62412	Normal	BLCA
TCGA-GC-A3YS-01A	3.22182	Tumor	BLCA
TCGA-4Z-AA7Q-01A	3.86357	Tumor	BLCA
TCGA-LT-A5Z6-01A	3.33681	Tumor	BLCA
TCGA-GC-A3I6-01A	4.84476	Tumor	BLCA
TCGA-E7-A5KF-01A	2.77928	Tumor	BLCA
TCGA-DK-A3IM-01A	3.92954	Tumor	BLCA
TCGA-CF-A47X-01A	1.08108	Tumor	BLCA
TCGA-BT-A2LA-01A	5.53699	Tumor	BLCA
TCGA-GV-A3QK-01B	3.14443	Tumor	BLCA
TCGA-FD-A6TD-01A	5.13339	Tumor	BLCA
TCGA-XF-AAMX-01A	3.87159	Tumor	BLCA
TCGA-ZF-A9R5-01A	2.56219	Tumor	BLCA
TCGA-XF-A8HC-01A	4.17791	Tumor	BLCA
TCGA-ZF-A9RF-01A	4.31013	Tumor	BLCA
TCGA-H4-A2HO-01A	2.79772	Tumor	BLCA
TCGA-BT-A42E-01A	3.90542	Tumor	BLCA
TCGA-FD-A5BU-01A	3.20137	Tumor	BLCA
TCGA-XF-A9T6-01A	5.08714	Tumor	BLCA
TCGA-ZF-AA4T-01A	4.52357	Tumor	BLCA
TCGA-FD-A3B6-01A	3.53217	Tumor	BLCA
TCGA-4Z-AA80-01A	4.32672	Tumor	BLCA
TCGA-GC-A6I3-11A	3.8215	Normal	BLCA
TCGA-XF-A9SW-01A	3.21853	Tumor	BLCA
TCGA-E7-A5KE-01A	3.3999	Tumor	BLCA
TCGA-DK-AA6S-01A	2.78738	Tumor	BLCA
TCGA-FD-A5BR-01A	2.73352	Tumor	BLCA
TCGA-FD-A6TC-01A	4.34109	Tumor	BLCA
TCGA-XF-AAN1-01A	2.99523	Tumor	BLCA
TCGA-DK-A3IV-01A	5.60353	Tumor	BLCA
TCGA-PQ-A6FN-01A	3.85066	Tumor	BLCA
TCGA-K4-A5RI-01A	3.26673	Tumor	BLCA
TCGA-ZF-A9R7-01A	3.43533	Tumor	BLCA
TCGA-XF-A9SM-01A	5.81173	Tumor	BLCA
TCGA-BL-A13J-11A	0.616611	Normal	BLCA
TCGA-FD-A6TE-01A	3.57718	Tumor	BLCA
TCGA-XF-AAME-01A	2.0381	Tumor	BLCA
TCGA-BT-A42C-01A	2.71523	Tumor	BLCA
TCGA-CF-A47Y-01A	2.26188	Tumor	BLCA
TCGA-E7-A519-01A	3.11058	Tumor	BLCA
TCGA-FD-A43Y-01A	2.76321	Tumor	BLCA
TCGA-BL-A5ZZ-01A	3.0765	Tumor	BLCA
TCGA-CF-A3MF-01A	0.917079	Tumor	BLCA
TCGA-FD-A3B8-01A	2.32817	Tumor	BLCA
TCGA-BL-A13I-01B	1.83068	Tumor	BLCA
TCGA-DK-A1A7-01A	2.90643	Tumor	BLCA
TCGA-DK-A1A6-01A	3.64575	Tumor	BLCA
TCGA-DK-A6B2-01A	3.75581	Tumor	BLCA
TCGA-DK-AA74-01A	3.00289	Tumor	BLCA
TCGA-ZF-AA4N-01A	2.5168	Tumor	BLCA
TCGA-BT-A0YX-01A	2.72309	Tumor	BLCA
TCGA-R3-A69X-01A	3.03486	Tumor	BLCA
TCGA-XF-AAMW-01A	1.97529	Tumor	BLCA
TCGA-C4-A0EZ-01A	5.3713	Tumor	BLCA
TCGA-E7-A678-01A	2.85691	Tumor	BLCA
TCGA-G2-A3IB-01A	3.05381	Tumor	BLCA
TCGA-BL-A13J-01B	2.27018	Tumor	BLCA
TCGA-DK-A3IT-01A	3.82373	Tumor	BLCA
TCGA-MV-A51V-01A	2.84092	Tumor	BLCA
TCGA-UY-A78O-01A	3.30686	Tumor	BLCA
TCGA-FD-A6TK-01A	2.49111	Tumor	BLCA
TCGA-4Z-AA83-01A	1.72383	Tumor	BLCA
TCGA-DK-A2I6-01A	2.24816	Tumor	BLCA
TCGA-XF-AAN4-01A	1.59161	Tumor	BLCA
TCGA-GD-A3OP-11A	1.93062	Normal	BLCA
TCGA-BT-A20R-11A	0.0866672	Normal	BLCA
TCGA-CF-A27C-01A	2.31927	Tumor	BLCA
TCGA-5N-A9KM-01A	3.09134	Tumor	BLCA
TCGA-BT-A20U-01A	2.88567	Tumor	BLCA
TCGA-YC-A9TC-01A	3.12171	Tumor	BLCA
TCGA-E7-A6MD-01A	2.34353	Tumor	BLCA
TCGA-K4-A5RH-01A	3.31092	Tumor	BLCA
TCGA-XF-AAMH-01A	3.41743	Tumor	BLCA
TCGA-DK-A1AB-01A	2.93168	Tumor	BLCA
TCGA-E5-A4TZ-01A	4.84522	Tumor	BLCA
TCGA-FD-A43X-01A	2.20406	Tumor	BLCA
TCGA-XF-A9SU-01A	3.60047	Tumor	BLCA
TCGA-BT-A20N-01A	2.90669	Tumor	BLCA
TCGA-BT-A20J-01A	3.70697	Tumor	BLCA
TCGA-E7-A4IJ-01A	3.00906	Tumor	BLCA
TCGA-CF-A47W-01A	2.73844	Tumor	BLCA
TCGA-XF-A9SV-01A	3.44202	Tumor	BLCA
TCGA-K4-AAQO-01A	3.52413	Tumor	BLCA
TCGA-CU-A3YL-01A	2.55754	Tumor	BLCA
TCGA-DK-A2I2-01A	3.26032	Tumor	BLCA
TCGA-4Z-AA84-01A	2.21392	Tumor	BLCA
TCGA-DK-A1AF-01A	2.26997	Tumor	BLCA
TCGA-E5-A4U1-01A	3.35271	Tumor	BLCA
TCGA-BT-A20Q-01A	1.94497	Tumor	BLCA
TCGA-ZF-A9R4-01A	3.48229	Tumor	BLCA
TCGA-KQ-A41Q-01A	4.75583	Tumor	BLCA
TCGA-E7-A8O7-01A	2.14367	Tumor	BLCA
TCGA-ZF-AA4W-01A	3.46294	Tumor	BLCA
TCGA-XF-AAN7-01A	3.59877	Tumor	BLCA
TCGA-XF-A8HH-01A	2.96554	Tumor	BLCA
TCGA-FD-A5BX-01A	2.09154	Tumor	BLCA
TCGA-ZF-A9RE-01A	2.89375	Tumor	BLCA
TCGA-FT-A3EE-01A	1.64773	Tumor	BLCA
TCGA-XF-A9T5-01A	4.36861	Tumor	BLCA
TCGA-XF-AAML-01A	5.11713	Tumor	BLCA
TCGA-BT-A3PK-01A	2.55666	Tumor	BLCA
TCGA-CF-A3MI-01A	1.65604	Tumor	BLCA
TCGA-E7-A541-01A	3.96785	Tumor	BLCA
TCGA-ZF-AA54-01A	2.56331	Tumor	BLCA
TCGA-CU-A0YR-11A	1.38091	Normal	BLCA
TCGA-XF-AAMZ-01A	2.77054	Tumor	BLCA
TCGA-CF-A8HY-01A	1.86158	Tumor	BLCA
TCGA-GV-A3QG-01A	4.1276	Tumor	BLCA
TCGA-DK-A6B6-01A	3.06532	Tumor	BLCA
TCGA-DK-A6B0-01A	2.87862	Tumor	BLCA
TCGA-E7-A97Q-01A	3.05114	Tumor	BLCA
TCGA-2F-A9KP-01A	2.80416	Tumor	BLCA
TCGA-FD-A62P-01A	2.62848	Tumor	BLCA
TCGA-XF-A8HG-01A	3.33124	Tumor	BLCA
TCGA-4Z-AA86-01A	3.31767	Tumor	BLCA
TCGA-GD-A6C6-01A	4.14627	Tumor	BLCA
TCGA-G2-A2EJ-01A	3.22673	Tumor	BLCA
TCGA-UY-A9PD-01A	4.39471	Tumor	BLCA
TCGA-S5-A6DX-01A	3.04757	Tumor	BLCA
TCGA-FD-A3SQ-01A	1.83484	Tumor	BLCA
TCGA-DK-AA77-01A	2.89183	Tumor	BLCA
TCGA-BL-A13I-01A	1.88176	Tumor	BLCA
TCGA-K4-A6MB-01A	3.33294	Tumor	BLCA
TCGA-ZF-AA51-01A	2.29235	Tumor	BLCA
TCGA-E7-A7PW-01A	3.63647	Tumor	BLCA
TCGA-E7-A85H-01A	4.16163	Tumor	BLCA
TCGA-GC-A3WC-11A	1.17359	Normal	BLCA
TCGA-XF-AAMR-01A	2.86943	Tumor	BLCA
TCGA-FD-A6TG-01A	2.30148	Tumor	BLCA
TCGA-2F-A9KO-01A	2.80131	Tumor	BLCA
TCGA-HQ-A5ND-01A	5.60442	Tumor	BLCA
TCGA-G2-AA3B-01A	4.48121	Tumor	BLCA
TCGA-PQ-A6FI-01A	3.9947	Tumor	BLCA
TCGA-C4-A0F7-01A	3.9032	Tumor	BLCA
TCGA-FD-A5BS-01A	3.0334	Tumor	BLCA
TCGA-GV-A3JX-01A	3.4326	Tumor	BLCA
TCGA-XF-AAMT-01A	2.97537	Tumor	BLCA
TCGA-XF-A9T8-01A	3.40688	Tumor	BLCA
TCGA-BT-A20W-11A	2.61531	Normal	BLCA
TCGA-4Z-AA7S-01A	4.07706	Tumor	BLCA
TCGA-XF-A9SH-01A	2.14402	Tumor	BLCA
TCGA-DK-A1AG-01A	2.96126	Tumor	BLCA
TCGA-GD-A3OQ-11A	2.20589	Normal	BLCA
TCGA-2F-A9KR-01A	2.66393	Tumor	BLCA
TCGA-DK-AA6U-01A	3.80281	Tumor	BLCA
TCGA-C4-A0F6-01A	3.62586	Tumor	BLCA
TCGA-K4-A3WU-01B	2.42947	Tumor	BLCA
TCGA-CU-A0YN-01A	3.58405	Tumor	BLCA
TCGA-FJ-A871-01A	3.14152	Tumor	BLCA
TCGA-G2-A2EC-01A	2.49944	Tumor	BLCA
TCGA-FD-A5BV-01A	4.07467	Tumor	BLCA
TCGA-E7-A7XN-01A	2.71131	Tumor	BLCA
TCGA-GU-A764-01A	4.00556	Tumor	BLCA
TCGA-XF-AAN8-01A	0.770592	Tumor	BLCA
TCGA-XF-A9SZ-01A	4.52296	Tumor	BLCA
TCGA-GU-AATO-01A	4.29288	Tumor	BLCA
TCGA-ZF-A9RC-01A	3.15805	Tumor	BLCA
TCGA-ZF-A9R0-01A	3.82932	Tumor	BLCA
TCGA-KQ-A41P-01A	2.81052	Tumor	BLCA
TCGA-4Z-AA7W-01A	4.22524	Tumor	BLCA
TCGA-HQ-A5NE-01A	3.92946	Tumor	BLCA
TCGA-CU-A3KJ-01A	2.7923	Tumor	BLCA
TCGA-UY-A8OC-01A	1.23967	Tumor	BLCA
TCGA-E7-A3Y1-01A	2.78234	Tumor	BLCA
TCGA-XF-AAN5-01A	3.93063	Tumor	BLCA
TCGA-G2-AA3D-01A	3.51809	Tumor	BLCA
TCGA-GU-A42R-01A	2.88948	Tumor	BLCA
TCGA-XF-A9SI-01A	2.74528	Tumor	BLCA
TCGA-GV-A3JZ-01A	3.31445	Tumor	BLCA
TCGA-E9-A1NI-01A	3.4386	Tumor	BRCA
TCGA-A1-A0SP-01A	3.90734	Tumor	BRCA
TCGA-BH-A1EU-11A	1.03905	Normal	BRCA
TCGA-A8-A06X-01A	3.92158	Tumor	BRCA
TCGA-E2-A14T-01A	1.38091	Tumor	BRCA
TCGA-AC-A8OS-01A	1.1424	Tumor	BRCA
TCGA-A8-A09K-01A	2.72336	Tumor	BRCA
TCGA-OL-A5RY-01A	2.69251	Tumor	BRCA
TCGA-BH-A0DG-01A	2.67439	Tumor	BRCA
TCGA-B6-A0I9-01A	2.57169	Tumor	BRCA
TCGA-A2-A0CP-01A	1.5962	Tumor	BRCA
TCGA-A8-A07S-01A	2.67154	Tumor	BRCA
TCGA-AO-A12H-01A	2.31798	Tumor	BRCA
TCGA-BH-A203-11A	1.15897	Normal	BRCA
TCGA-AR-A1AU-01A	1.39845	Tumor	BRCA
TCGA-D8-A1X9-01A	3.05469	Tumor	BRCA
TCGA-E9-A1RH-11A	0.601113	Normal	BRCA
TCGA-A8-A07R-01A	4.04388	Tumor	BRCA
TCGA-AO-A12C-01A	1.57145	Tumor	BRCA
TCGA-V7-A7HQ-01A	3.45689	Tumor	BRCA
TCGA-A2-A1FZ-01A	1.9698	Tumor	BRCA
TCGA-AR-A251-01A	3.16774	Tumor	BRCA
TCGA-BH-A18J-11A	0.922272	Normal	BRCA
TCGA-EW-A1PF-01A	1.7981	Tumor	BRCA
TCGA-BH-A18T-01A	2.64903	Tumor	BRCA
TCGA-AR-A24S-01A	2.54078	Tumor	BRCA
TCGA-AN-A041-01A	2.46264	Tumor	BRCA
TCGA-BH-A0E0-11A	1.10947	Normal	BRCA
TCGA-E2-A1LL-01A	3.31877	Tumor	BRCA
TCGA-E2-A1IJ-01A	2.29582	Tumor	BRCA
TCGA-AR-A24O-01A	2.16848	Tumor	BRCA
TCGA-XX-A899-01A	1.64328	Tumor	BRCA
TCGA-D8-A1XK-01A	2.88278	Tumor	BRCA
TCGA-AC-A5XS-01A	3.52557	Tumor	BRCA
TCGA-BH-A18L-01A	2.94407	Tumor	BRCA
TCGA-OL-A66J-01A	1.57922	Tumor	BRCA
TCGA-PE-A5DD-01A	2.76075	Tumor	BRCA
TCGA-AN-A04D-01A	3.8879	Tumor	BRCA
TCGA-4H-AAAK-01A	2.10724	Tumor	BRCA
TCGA-E9-A5FL-01A	3.18573	Tumor	BRCA
TCGA-E9-A24A-01A	1.73679	Tumor	BRCA
TCGA-BH-A1FM-01A	4.40333	Tumor	BRCA
TCGA-A8-A07C-01A	3.2714	Tumor	BRCA
TCGA-AR-A24Q-01A	3.60017	Tumor	BRCA
TCGA-AR-A2LE-01A	1.37729	Tumor	BRCA
TCGA-AR-A0U4-01A	2.96189	Tumor	BRCA
TCGA-GM-A2DN-01A	3.97611	Tumor	BRCA
TCGA-A7-A13D-01A	1.86009	Tumor	BRCA
TCGA-D8-A1JG-01B	3.32416	Tumor	BRCA
TCGA-E2-A570-01A	2.36947	Tumor	BRCA
TCGA-A2-A04Q-01A	3.03857	Tumor	BRCA
TCGA-A7-A6VV-01A	4.96186	Tumor	BRCA
TCGA-E2-A1IG-01A	1.23582	Tumor	BRCA
TCGA-E9-A1N6-01A	2.22885	Tumor	BRCA
TCGA-E9-A1NC-01A	2.98455	Tumor	BRCA
TCGA-A7-A3IZ-01A	1.34058	Tumor	BRCA
TCGA-BH-A18U-11A	1.7514	Normal	BRCA
TCGA-AN-A0AK-01A	3.02134	Tumor	BRCA
TCGA-D8-A1JM-01A	3.71511	Tumor	BRCA
TCGA-OL-A5S0-01A	4.02861	Tumor	BRCA
TCGA-A8-A06Z-01A	2.65981	Tumor	BRCA
TCGA-AQ-A54O-01A	3.81318	Tumor	BRCA
TCGA-E2-A15S-01A	1.96879	Tumor	BRCA
TCGA-BH-A1ET-11B	0.356918	Normal	BRCA
TCGA-BH-A18R-11A	0.828473	Normal	BRCA
TCGA-EW-A423-01A	2.0426	Tumor	BRCA
TCGA-C8-A273-01A	1.6275	Tumor	BRCA
TCGA-OL-A5RV-01A	2.22818	Tumor	BRCA
TCGA-AC-A2FM-01A	1.37898	Tumor	BRCA
TCGA-AO-A0JM-01A	3.71171	Tumor	BRCA
TCGA-BH-A0DP-01A	2.74524	Tumor	BRCA
TCGA-A2-A25E-01A	2.42821	Tumor	BRCA
TCGA-B6-A2IU-01A	3.71205	Tumor	BRCA
TCGA-BH-A18P-01A	1.7586	Tumor	BRCA
TCGA-E9-A22B-01A	1.67245	Tumor	BRCA
TCGA-A2-A0SW-01A	3.77311	Tumor	BRCA
TCGA-E2-A107-01A	4.29329	Tumor	BRCA
TCGA-E2-A1B6-01A	3.21279	Tumor	BRCA
TCGA-D8-A1XW-01A	2.38848	Tumor	BRCA
TCGA-A7-A0DC-01A	0.813127	Tumor	BRCA
TCGA-EW-A6SD-01A	3.49285	Tumor	BRCA
TCGA-AO-A0J3-01A	3.26056	Tumor	BRCA
TCGA-A7-A0DC-11A	0.878134	Normal	BRCA
TCGA-AN-A03X-01A	2.44023	Tumor	BRCA
TCGA-BH-A1FM-11B	0.67282	Normal	BRCA
TCGA-A8-A099-01A	2.13591	Tumor	BRCA
TCGA-E2-A14Z-01A	2.80664	Tumor	BRCA
TCGA-AR-A5QP-01A	3.30971	Tumor	BRCA
TCGA-AC-A62X-01A	3.80963	Tumor	BRCA
TCGA-BH-A42V-01A	1.80513	Tumor	BRCA
TCGA-B6-A0RS-01A	3.20896	Tumor	BRCA
TCGA-D8-A1JL-01A	2.97706	Tumor	BRCA
TCGA-BH-A0DZ-01A	2.99447	Tumor	BRCA
TCGA-A8-A06Y-01A	2.22647	Tumor	BRCA
TCGA-B6-A1KC-01B	2.13104	Tumor	BRCA
TCGA-C8-A135-01A	3.00123	Tumor	BRCA
TCGA-5L-AAT1-01A	1.63708	Tumor	BRCA
TCGA-AR-A24R-01A	3.17637	Tumor	BRCA
TCGA-S3-AA0Z-01A	4.89671	Tumor	BRCA
TCGA-D8-A1J8-01A	2.86596	Tumor	BRCA
TCGA-A2-A0ER-01A	2.12267	Tumor	BRCA
TCGA-E9-A1ND-01A	2.39002	Tumor	BRCA
TCGA-GI-A2C8-11A	0.267003	Normal	BRCA
TCGA-A2-A1G1-01A	1.3524	Tumor	BRCA
TCGA-A2-A0SU-01A	3.19725	Tumor	BRCA
TCGA-E2-A1LB-01A	1.75144	Tumor	BRCA
TCGA-E9-A1RD-01A	2.07077	Tumor	BRCA
TCGA-OL-A6VQ-01A	2.13019	Tumor	BRCA
TCGA-AQ-A04J-01A	3.85147	Tumor	BRCA
TCGA-AQ-A1H3-01A	2.92458	Tumor	BRCA
TCGA-A2-A259-01A	1.99853	Tumor	BRCA
TCGA-WT-AB44-01A	2.14127	Tumor	BRCA
TCGA-B6-A0IN-01A	1.73573	Tumor	BRCA
TCGA-E9-A1R3-01A	0.956009	Tumor	BRCA
TCGA-A8-A086-01A	2.55697	Tumor	BRCA
TCGA-AC-A3BB-01A	2.72954	Tumor	BRCA
TCGA-AC-A2QI-01A	1.53562	Tumor	BRCA
TCGA-BH-A1F5-01A	3.50119	Tumor	BRCA
TCGA-AC-A3HN-01A	1.90775	Tumor	BRCA
TCGA-BH-A1FG-01A	2.37579	Tumor	BRCA
TCGA-BH-A0DV-01A	1.48645	Tumor	BRCA
TCGA-UL-AAZ6-01A	4.04267	Tumor	BRCA
TCGA-AR-A255-01A	2.49555	Tumor	BRCA
TCGA-LD-A7W6-01A	2.53025	Tumor	BRCA
TCGA-AR-A24Z-01A	3.24538	Tumor	BRCA
TCGA-A1-A0SO-01A	5.38963	Tumor	BRCA
TCGA-A2-A3XS-01A	3.39776	Tumor	BRCA
TCGA-D8-A1X6-01A	3.46864	Tumor	BRCA
TCGA-BH-A0HF-01A	2.909	Tumor	BRCA
TCGA-A7-A3J0-01A	1.69049	Tumor	BRCA
TCGA-AC-A23C-01A	2.07374	Tumor	BRCA
TCGA-LL-A442-01A	2.03808	Tumor	BRCA
TCGA-S3-A6ZH-01A	4.44485	Tumor	BRCA
TCGA-AC-A8OR-01A	1.28582	Tumor	BRCA
TCGA-AR-A1AX-01A	2.76663	Tumor	BRCA
TCGA-D8-A1XO-01A	2.28926	Tumor	BRCA
TCGA-E9-A1R2-01A	2.36193	Tumor	BRCA
TCGA-D8-A27M-01A	2.18813	Tumor	BRCA
TCGA-AN-A0FY-01A	3.96257	Tumor	BRCA
TCGA-BH-A0DX-01A	2.0224	Tumor	BRCA
TCGA-EW-A1IY-01A	2.52289	Tumor	BRCA
TCGA-A2-A04N-01A	2.69844	Tumor	BRCA
TCGA-A2-A0YF-01A	3.61088	Tumor	BRCA
TCGA-PE-A5DE-01A	3.01638	Tumor	BRCA
TCGA-BH-A1FN-11A	1.79437	Normal	BRCA
TCGA-EW-A1J5-01A	2.63527	Tumor	BRCA
TCGA-AO-A0JE-01A	3.93796	Tumor	BRCA
TCGA-BH-A1FN-01A	3.37927	Tumor	BRCA
TCGA-BH-A18V-01A	3.47448	Tumor	BRCA
TCGA-AC-A23H-11A	1.37913	Normal	BRCA
TCGA-BH-A0BF-01A	2.47141	Tumor	BRCA
TCGA-B6-A409-01A	3.11586	Tumor	BRCA
TCGA-A2-A0CL-01A	2.91135	Tumor	BRCA
TCGA-A2-A0CO-01A	1.28001	Tumor	BRCA
TCGA-E2-A158-11A	0.590021	Normal	BRCA
TCGA-AC-A3QP-01A	2.53815	Tumor	BRCA
TCGA-AC-A2QJ-01A	0.756356	Tumor	BRCA
TCGA-B6-A0RM-01A	4.0717	Tumor	BRCA
TCGA-D8-A1JS-01A	1.36951	Tumor	BRCA
TCGA-E9-A1RB-11A	1.96759	Normal	BRCA
TCGA-A7-A26J-01A	2.72735	Tumor	BRCA
TCGA-A7-A13H-01A	2.11305	Tumor	BRCA
TCGA-AO-A126-01A	1.7348	Tumor	BRCA
TCGA-BH-A6R8-01A	3.69461	Tumor	BRCA
TCGA-A7-A0DB-01C	1.83379	Tumor	BRCA
TCGA-AC-A3TM-01A	4.00293	Tumor	BRCA
TCGA-AR-A0TQ-01A	3.52841	Tumor	BRCA
TCGA-GM-A2DH-01A	4.16589	Tumor	BRCA
TCGA-B6-A0RI-01A	1.58861	Tumor	BRCA
TCGA-A2-A1G0-01A	1.05124	Tumor	BRCA
TCGA-A2-A1FX-01A	3.44067	Tumor	BRCA
TCGA-A7-A26G-01A	2.0317	Tumor	BRCA
TCGA-E2-A1LI-01A	3.86048	Tumor	BRCA
TCGA-A8-A08P-01A	2.55271	Tumor	BRCA
TCGA-E2-A1IN-01A	2.74159	Tumor	BRCA
TCGA-BH-A0HA-01A	2.83014	Tumor	BRCA
TCGA-AO-A1KR-01A	3.67075	Tumor	BRCA
TCGA-3C-AALK-01A	2.39164	Tumor	BRCA
TCGA-BH-A0BV-01A	2.74951	Tumor	BRCA
TCGA-E2-A1IH-01A	2.8177	Tumor	BRCA
TCGA-XX-A89A-01A	2.37802	Tumor	BRCA
TCGA-E9-A1RH-01A	4.12729	Tumor	BRCA
TCGA-A8-A085-01A	3.35321	Tumor	BRCA
TCGA-E9-A1N3-01A	1.48569	Tumor	BRCA
TCGA-BH-A1EW-11B	1.16136	Normal	BRCA
TCGA-D8-A13Y-01A	5.28317	Tumor	BRCA
TCGA-AO-A0JB-01A	1.90419	Tumor	BRCA
TCGA-AC-A6IV-01A	2.52902	Tumor	BRCA
TCGA-A8-A09M-01A	3.00191	Tumor	BRCA
TCGA-BH-A0GY-01A	3.07053	Tumor	BRCA
TCGA-AR-A2LL-01A	2.72331	Tumor	BRCA
TCGA-BH-A208-01A	1.26595	Tumor	BRCA
TCGA-E2-A15I-11A	0.675031	Normal	BRCA
TCGA-EW-A1PE-01A	2.3031	Tumor	BRCA
TCGA-AO-A125-01A	3.81326	Tumor	BRCA
TCGA-E2-A1B1-01A	2.15426	Tumor	BRCA
TCGA-BH-A0C0-01A	3.9597	Tumor	BRCA
TCGA-A7-A26I-01B	1.33911	Tumor	BRCA
TCGA-AO-A0JJ-01A	2.84448	Tumor	BRCA
TCGA-AR-A2LH-01A	3.47278	Tumor	BRCA
TCGA-A2-A3XW-01A	2.32165	Tumor	BRCA
TCGA-AR-A0TS-01A	4.11932	Tumor	BRCA
TCGA-BH-A0AV-01A	3.89108	Tumor	BRCA
TCGA-A8-A07B-01A	1.22554	Tumor	BRCA
TCGA-LL-A73Z-01A	2.92716	Tumor	BRCA
TCGA-BH-A0BA-11A	1.22622	Normal	BRCA
TCGA-BH-A0B3-11B	1.25105	Normal	BRCA
TCGA-B6-A402-01A	3.16766	Tumor	BRCA
TCGA-AR-A0TT-01A	2.32624	Tumor	BRCA
TCGA-EW-A6SB-01A	3.34924	Tumor	BRCA
TCGA-AC-A2FB-01A	1.94482	Tumor	BRCA
TCGA-AC-A62V-01A	3.56659	Tumor	BRCA
TCGA-D8-A1XQ-01A	3.18717	Tumor	BRCA
TCGA-BH-A0DD-01A	3.56277	Tumor	BRCA
TCGA-Z7-A8R6-01A	4.9136	Tumor	BRCA
TCGA-OL-A5DA-01A	1.37133	Tumor	BRCA
TCGA-WT-AB41-01A	2.41846	Tumor	BRCA
TCGA-E2-A1LA-01A	2.91739	Tumor	BRCA
TCGA-AR-A24N-01A	3.3562	Tumor	BRCA
TCGA-E9-A3QA-01A	3.50087	Tumor	BRCA
TCGA-BH-A0DO-11A	1.29315	Normal	BRCA
TCGA-E2-A15J-01A	1.82299	Tumor	BRCA
TCGA-LL-A73Y-01A	1.41628	Tumor	BRCA
TCGA-A2-A4RY-01A	1.27546	Tumor	BRCA
TCGA-D8-A1XU-01A	1.7404	Tumor	BRCA
TCGA-E2-A1LS-11A	0.51274	Normal	BRCA
TCGA-AN-A0FJ-01A	2.73511	Tumor	BRCA
TCGA-BH-A0DK-01A	2.92843	Tumor	BRCA
TCGA-B6-A0IJ-01A	3.42438	Tumor	BRCA
TCGA-LL-A7SZ-01A	2.96037	Tumor	BRCA
TCGA-C8-A26Y-01A	4.26014	Tumor	BRCA
TCGA-GI-A2C9-11A	1.08568	Normal	BRCA
TCGA-BH-A0BQ-11A	1.69898	Normal	BRCA
TCGA-A8-A06R-01A	3.09886	Tumor	BRCA
TCGA-AO-A128-01A	3.11895	Tumor	BRCA
TCGA-E2-A1BC-01A	1.21271	Tumor	BRCA
TCGA-A7-A0CE-11A	1.09335	Normal	BRCA
TCGA-B6-A0I6-01A	2.60829	Tumor	BRCA
TCGA-BH-A1ET-01A	1.79096	Tumor	BRCA
TCGA-A2-A04V-01A	2.80754	Tumor	BRCA
TCGA-A7-A2KD-01A	3.4189	Tumor	BRCA
TCGA-A7-A0CE-01A	4.40133	Tumor	BRCA
TCGA-D8-A1JE-01A	3.12733	Tumor	BRCA
TCGA-B6-A0WX-01A	3.14694	Tumor	BRCA
TCGA-A7-A4SB-01A	2.69573	Tumor	BRCA
TCGA-EW-A1J1-01A	1.46622	Tumor	BRCA
TCGA-A2-A0YM-01A	3.63924	Tumor	BRCA
TCGA-A8-A0A4-01A	2.55524	Tumor	BRCA
TCGA-A2-A0EM-01A	2.34562	Tumor	BRCA
TCGA-AR-A24X-01A	2.03822	Tumor	BRCA
TCGA-C8-A132-01A	1.66905	Tumor	BRCA
TCGA-AN-A049-01A	2.93152	Tumor	BRCA
TCGA-A2-A0SY-01A	1.90107	Tumor	BRCA
TCGA-B6-A0RU-01A	3.67608	Tumor	BRCA
TCGA-AR-A0TX-01A	2.27295	Tumor	BRCA
TCGA-BH-A0HQ-01A	2.26349	Tumor	BRCA
TCGA-E2-A15C-01A	2.52685	Tumor	BRCA
TCGA-AQ-A54N-01A	2.49146	Tumor	BRCA
TCGA-A8-A07I-01A	1.85236	Tumor	BRCA
TCGA-B6-A1KI-01A	1.47872	Tumor	BRCA
TCGA-B6-A0RH-01A	2.75739	Tumor	BRCA
TCGA-BH-A5IZ-01A	2.88219	Tumor	BRCA
TCGA-AN-A0XU-01A	3.62858	Tumor	BRCA
TCGA-LD-A74U-01A	2.14322	Tumor	BRCA
TCGA-B6-A401-01A	2.28458	Tumor	BRCA
TCGA-PL-A8LV-01A	3.08604	Tumor	BRCA
TCGA-BH-A0C3-11A	0.670601	Normal	BRCA
TCGA-BH-A0BR-01A	2.22512	Tumor	BRCA
TCGA-A8-A07G-01A	1.59864	Tumor	BRCA
TCGA-A2-A0EN-01A	1.71501	Tumor	BRCA
TCGA-OK-A5Q2-01A	3.31543	Tumor	BRCA
TCGA-A8-A084-01A	3.04826	Tumor	BRCA
TCGA-BH-A0DS-01A	2.14252	Tumor	BRCA
TCGA-A8-A09I-01A	3.78274	Tumor	BRCA
TCGA-GM-A3XL-01A	3.39351	Tumor	BRCA
TCGA-W8-A86G-01A	1.80737	Tumor	BRCA
TCGA-AO-A12F-01A	3.52945	Tumor	BRCA
TCGA-BH-A0HK-01A	2.10365	Tumor	BRCA
TCGA-A8-A06Q-01A	2.39152	Tumor	BRCA
TCGA-BH-A42U-01A	1.79072	Tumor	BRCA
TCGA-BH-A0BW-11A	2.29416	Normal	BRCA
TCGA-AQ-A04L-01B	2.17786	Tumor	BRCA
TCGA-AR-A1AO-01A	2.37719	Tumor	BRCA
TCGA-Z7-A8R5-01A	2.03569	Tumor	BRCA
TCGA-B6-A0I1-01A	2.67808	Tumor	BRCA
TCGA-E9-A1N6-11A	1.3837	Normal	BRCA
TCGA-EW-A1PA-01A	2.95414	Tumor	BRCA
TCGA-BH-A0W4-01A	1.70343	Tumor	BRCA
TCGA-A2-A3XZ-01A	3.02503	Tumor	BRCA
TCGA-A7-A26H-01A	2.15119	Tumor	BRCA
TCGA-E2-A1B0-01A	2.58809	Tumor	BRCA
TCGA-BH-A1EU-01A	2.00175	Tumor	BRCA
TCGA-AC-A23H-01A	2.61635	Tumor	BRCA
TCGA-EW-A1P4-01A	3.07958	Tumor	BRCA
TCGA-E2-A10E-01A	2.2997	Tumor	BRCA
TCGA-EW-A1P0-01A	1.56477	Tumor	BRCA
TCGA-EW-A6S9-01A	2.87904	Tumor	BRCA
TCGA-A2-A25B-01A	3.44754	Tumor	BRCA
TCGA-LL-A6FR-01A	2.18855	Tumor	BRCA
TCGA-AR-A5QM-01A	3.47519	Tumor	BRCA
TCGA-BH-A18Q-11A	0.912742	Normal	BRCA
TCGA-EW-A1P5-01A	3.15044	Tumor	BRCA
TCGA-E2-A14O-01A	3.74392	Tumor	BRCA
TCGA-AN-A0AR-01A	4.09386	Tumor	BRCA
TCGA-E9-A22D-01A	4.30286	Tumor	BRCA
TCGA-A2-A0CS-01A	2.87875	Tumor	BRCA
TCGA-E2-A1IF-01A	4.11649	Tumor	BRCA
TCGA-BH-A0DZ-11A	2.15929	Normal	BRCA
TCGA-E2-A1IE-01A	1.81872	Tumor	BRCA
TCGA-BH-A0BW-01A	2.93163	Tumor	BRCA
TCGA-E2-A1AZ-01A	3.10189	Tumor	BRCA
TCGA-D8-A27N-01A	2.45466	Tumor	BRCA
TCGA-A2-A0CT-01A	3.06881	Tumor	BRCA
TCGA-A8-A09R-01A	1.98053	Tumor	BRCA
TCGA-B6-A0RE-01A	2.66626	Tumor	BRCA
TCGA-E9-A249-01A	3.73696	Tumor	BRCA
TCGA-E2-A1B5-01A	2.15308	Tumor	BRCA
TCGA-A2-A25A-01A	2.36592	Tumor	BRCA
TCGA-AO-A03O-01A	4.34595	Tumor	BRCA
TCGA-E9-A22A-01A	3.77023	Tumor	BRCA
TCGA-BH-A1EV-11A	1.87301	Normal	BRCA
TCGA-BH-A0GZ-01A	3.04439	Tumor	BRCA
TCGA-BH-A1FD-01A	2.087	Tumor	BRCA
TCGA-A1-A0SH-01A	1.81371	Tumor	BRCA
TCGA-E2-A10A-01A	3.01302	Tumor	BRCA
TCGA-B6-A0IO-01A	2.7271	Tumor	BRCA
TCGA-BH-A1FR-01A	1.7357	Tumor	BRCA
TCGA-D8-A143-01A	4.74623	Tumor	BRCA
TCGA-AO-A03R-01A	3.46376	Tumor	BRCA
TCGA-BH-A0DQ-11A	1.21878	Normal	BRCA
TCGA-BH-A0BV-11A	1.31412	Normal	BRCA
TCGA-BH-A0E0-01A	3.11627	Tumor	BRCA
TCGA-A8-A0AD-01A	2.43419	Tumor	BRCA
TCGA-GM-A2DI-01A	2.30959	Tumor	BRCA
TCGA-E9-A6HE-01A	3.76132	Tumor	BRCA
TCGA-BH-A0B3-01A	3.46728	Tumor	BRCA
TCGA-AR-A0TU-01A	3.14491	Tumor	BRCA
TCGA-LQ-A4E4-01A	3.15066	Tumor	BRCA
TCGA-PL-A8LY-01A	2.73662	Tumor	BRCA
TCGA-BH-A1FU-01A	2.58464	Tumor	BRCA
TCGA-A8-A09D-01A	1.25242	Tumor	BRCA
TCGA-B6-A3ZX-01A	2.53349	Tumor	BRCA
TCGA-A7-A5ZV-01A	3.28215	Tumor	BRCA
TCGA-BH-A0AY-01A	2.53101	Tumor	BRCA
TCGA-A7-A4SD-01A	2.58205	Tumor	BRCA
TCGA-AO-A03L-01A	3.35359	Tumor	BRCA
TCGA-A2-A0EX-01A	1.47265	Tumor	BRCA
TCGA-GM-A2DM-01A	0.92788	Tumor	BRCA
TCGA-BH-A0DO-01B	1.4701	Tumor	BRCA
TCGA-HN-A2OB-01A	1.01395	Tumor	BRCA
TCGA-A2-A0CM-01A	2.79749	Tumor	BRCA
TCGA-A2-A4S0-01A	1.05357	Tumor	BRCA
TCGA-BH-A0H9-01A	5.09593	Tumor	BRCA
TCGA-B6-A0IP-01A	3.01187	Tumor	BRCA
TCGA-C8-A12X-01A	2.337	Tumor	BRCA
TCGA-AN-A0AL-01A	2.40485	Tumor	BRCA
TCGA-LD-A9QF-01A	1.74576	Tumor	BRCA
TCGA-BH-A0DG-11A	1.55937	Normal	BRCA
TCGA-E2-A152-01A	2.70814	Tumor	BRCA
TCGA-BH-A1FE-06A	1.42313	Tumor	BRCA
TCGA-BH-A18N-01A	2.30985	Tumor	BRCA
TCGA-C8-A1HN-01A	4.49171	Tumor	BRCA
TCGA-AN-A0FK-01A	2.9559	Tumor	BRCA
TCGA-B6-A0IE-01A	4.19738	Tumor	BRCA
TCGA-B6-A400-01A	3.20719	Tumor	BRCA
TCGA-GM-A2DB-01A	4.08969	Tumor	BRCA
TCGA-AC-A2FK-01A	1.2348	Tumor	BRCA
TCGA-BH-A0HU-01A	5.15107	Tumor	BRCA
TCGA-D8-A140-01A	2.17678	Tumor	BRCA
TCGA-A7-A0CD-01A	2.89791	Tumor	BRCA
TCGA-D8-A1JF-01A	2.33924	Tumor	BRCA
TCGA-BH-A208-11A	1.01677	Normal	BRCA
TCGA-A2-A4S1-01A	1.97478	Tumor	BRCA
TCGA-5T-A9QA-01A	3.55113	Tumor	BRCA
TCGA-AR-A2LK-01A	4.39956	Tumor	BRCA
TCGA-AR-A1AH-01A	3.07412	Tumor	BRCA
TCGA-AR-A254-01A	2.49024	Tumor	BRCA
TCGA-E2-A1IO-01A	2.48423	Tumor	BRCA
TCGA-S3-A6ZF-01A	2.21141	Tumor	BRCA
TCGA-B6-A0IB-01A	3.47982	Tumor	BRCA
TCGA-A8-A07J-01A	2.62383	Tumor	BRCA
TCGA-AN-A0FV-01A	2.71299	Tumor	BRCA
TCGA-AN-A0XP-01A	1.77144	Tumor	BRCA
TCGA-A8-A08Z-01A	2.51537	Tumor	BRCA
TCGA-E9-A226-01A	4.14083	Tumor	BRCA
TCGA-AR-A1AW-01A	2.72338	Tumor	BRCA
TCGA-GI-A2C9-01A	2.12215	Tumor	BRCA
TCGA-EW-A6SA-01A	3.26501	Tumor	BRCA
TCGA-E9-A1NG-01A	2.50251	Tumor	BRCA
TCGA-A8-A07L-01A	3.59803	Tumor	BRCA
TCGA-E2-A15L-01A	1.902	Tumor	BRCA
TCGA-D8-A1JI-01A	1.57863	Tumor	BRCA
TCGA-GM-A2DO-01A	3.46708	Tumor	BRCA
TCGA-EW-A1P6-01A	3.23291	Tumor	BRCA
TCGA-BH-A1F0-11B	0.560133	Normal	BRCA
TCGA-AR-A1AI-01A	3.06819	Tumor	BRCA
TCGA-AR-A0U3-01A	2.46581	Tumor	BRCA
TCGA-A2-A0ES-01A	1.26602	Tumor	BRCA
TCGA-BH-A18K-11A	0.525197	Normal	BRCA
TCGA-A8-A06P-01A	2.30787	Tumor	BRCA
TCGA-S3-AA12-01A	2.4646	Tumor	BRCA
TCGA-E9-A1N5-11A	2.04972	Normal	BRCA
TCGA-E9-A3Q9-01A	1.07847	Tumor	BRCA
TCGA-BH-A0HX-01A	2.83524	Tumor	BRCA
TCGA-AC-A3W7-01A	1.85522	Tumor	BRCA
TCGA-AO-A124-01A	4.10112	Tumor	BRCA
TCGA-AC-A5XU-01A	3.41548	Tumor	BRCA
TCGA-LL-A6FQ-01A	2.75376	Tumor	BRCA
TCGA-AQ-A1H2-01A	2.3499	Tumor	BRCA
TCGA-BH-A0DQ-01A	2.72347	Tumor	BRCA
TCGA-E2-A106-01A	1.87805	Tumor	BRCA
TCGA-A2-A25F-01A	2.35325	Tumor	BRCA
TCGA-AN-A0AT-01A	3.90115	Tumor	BRCA
TCGA-D8-A27T-01A	2.57886	Tumor	BRCA
TCGA-A2-A04X-01A	3.60668	Tumor	BRCA
TCGA-A2-A3XT-01A	2.91976	Tumor	BRCA
TCGA-AR-A0TY-01A	3.87597	Tumor	BRCA
TCGA-A2-A0YG-01A	3.11354	Tumor	BRCA
TCGA-B6-A0WZ-01A	2.70368	Tumor	BRCA
TCGA-A7-A5ZX-01A	1.70585	Tumor	BRCA
TCGA-AC-A23G-01A	2.13869	Tumor	BRCA
TCGA-GM-A2DA-01A	2.20404	Tumor	BRCA
TCGA-B6-A0X1-01A	3.41732	Tumor	BRCA
TCGA-AO-A12E-01A	2.93051	Tumor	BRCA
TCGA-AR-A250-01A	3.05971	Tumor	BRCA
TCGA-A8-A06O-01A	2.85562	Tumor	BRCA
TCGA-AO-A12G-01A	1.54748	Tumor	BRCA
TCGA-A7-A3IY-01A	2.01482	Tumor	BRCA
TCGA-E2-A1IG-11A	0.669724	Normal	BRCA
TCGA-BH-A1EY-01A	1.77083	Tumor	BRCA
TCGA-A8-A079-01A	3.70257	Tumor	BRCA
TCGA-AO-A03P-01A	3.17812	Tumor	BRCA
TCGA-E2-A572-01A	2.01104	Tumor	BRCA
TCGA-A2-A0YH-01A	4.25294	Tumor	BRCA
TCGA-E2-A15G-01A	2.58934	Tumor	BRCA
TCGA-C8-A12M-01A	2.04802	Tumor	BRCA
TCGA-AR-A0TV-01A	4.19768	Tumor	BRCA
TCGA-A7-A13G-01B	1.02326	Tumor	BRCA
TCGA-A8-A07E-01A	2.47591	Tumor	BRCA
TCGA-E9-A1N9-01A	2.17754	Tumor	BRCA
TCGA-BH-A0H3-01A	2.16363	Tumor	BRCA
TCGA-AR-A1AY-01A	2.48054	Tumor	BRCA
TCGA-A2-A0D4-01A	2.83641	Tumor	BRCA
TCGA-E9-A5UO-01A	3.11429	Tumor	BRCA
TCGA-GM-A2DL-01A	2.67091	Tumor	BRCA
TCGA-EW-A1PD-01A	2.90598	Tumor	BRCA
TCGA-A1-A0SI-01A	4.0824	Tumor	BRCA
TCGA-A2-A0CV-01A	1.27006	Tumor	BRCA
TCGA-E2-A15E-06A	1.78248	Tumor	BRCA
TCGA-AO-A12B-01A	1.46323	Tumor	BRCA
TCGA-B6-A408-01A	2.90499	Tumor	BRCA
TCGA-OL-A5D7-01A	3.37767	Tumor	BRCA
TCGA-A2-A0EW-01A	1.29336	Tumor	BRCA
TCGA-A2-A0T4-01A	2.98887	Tumor	BRCA
TCGA-C8-A131-01A	3.34716	Tumor	BRCA
TCGA-BH-A1EN-01A	1.7171	Tumor	BRCA
TCGA-D8-A3Z5-01A	1.51452	Tumor	BRCA
TCGA-E9-A247-01A	4.66345	Tumor	BRCA
TCGA-C8-A12Q-01A	2.05379	Tumor	BRCA
TCGA-E2-A1BD-01A	3.95803	Tumor	BRCA
TCGA-E9-A1RI-01A	1.97365	Tumor	BRCA
TCGA-BH-A18M-11A	0.929655	Normal	BRCA
TCGA-E2-A105-01A	1.73252	Tumor	BRCA
TCGA-D8-A1JK-01A	3.33566	Tumor	BRCA
TCGA-E9-A1N9-11A	1.15805	Normal	BRCA
TCGA-BH-A0BJ-01A	1.64464	Tumor	BRCA
TCGA-S3-AA14-01A	1.16416	Tumor	BRCA
TCGA-C8-A26V-01A	2.25765	Tumor	BRCA
TCGA-BH-A1FB-01A	1.75434	Tumor	BRCA
TCGA-D8-A1JP-01A	3.95459	Tumor	BRCA
TCGA-E2-A14X-01A	1.91141	Tumor	BRCA
TCGA-BH-A0E2-01A	2.15154	Tumor	BRCA
TCGA-PL-A8LZ-01A	3.60241	Tumor	BRCA
TCGA-LL-A740-01A	2.14992	Tumor	BRCA
TCGA-BH-A0AZ-11A	1.4651	Normal	BRCA
TCGA-D8-A1X7-01A	2.80698	Tumor	BRCA
TCGA-AO-A0JD-01A	3.01538	Tumor	BRCA
TCGA-D8-A1X5-01A	3.27011	Tumor	BRCA
TCGA-E9-A22E-01A	2.44119	Tumor	BRCA
TCGA-AC-A23E-01A	1.86352	Tumor	BRCA
TCGA-AR-A0U2-01A	4.92967	Tumor	BRCA
TCGA-A2-A1FV-01A	1.14809	Tumor	BRCA
TCGA-A8-A09B-01A	2.35181	Tumor	BRCA
TCGA-AN-A0XO-01A	2.22371	Tumor	BRCA
TCGA-A7-A425-01A	2.63337	Tumor	BRCA
TCGA-BH-A0DD-11A	0.563397	Normal	BRCA
TCGA-A2-A0CZ-01A	0.878321	Tumor	BRCA
TCGA-GM-A3NY-01A	3.291	Tumor	BRCA
TCGA-AR-A0U0-01A	2.41138	Tumor	BRCA
TCGA-AR-A24P-01A	3.01557	Tumor	BRCA
TCGA-AN-A0G0-01A	2.56324	Tumor	BRCA
TCGA-AN-A0AM-01A	2.85177	Tumor	BRCA
TCGA-BH-A0E6-01A	3.09124	Tumor	BRCA
TCGA-E9-A248-01A	3.6634	Tumor	BRCA
TCGA-B6-A1KN-01A	2.77258	Tumor	BRCA
TCGA-LL-A9Q3-01A	1.75477	Tumor	BRCA
TCGA-A8-A08B-01A	3.91645	Tumor	BRCA
TCGA-A1-A0SG-01A	2.62069	Tumor	BRCA
TCGA-BH-A0H0-01A	3.36203	Tumor	BRCA
TCGA-D8-A1XR-01A	1.42099	Tumor	BRCA
TCGA-C8-A12P-01A	4.04062	Tumor	BRCA
TCGA-BH-A0BJ-11A	1.27193	Normal	BRCA
TCGA-LL-A50Y-01A	2.80976	Tumor	BRCA
TCGA-AO-A03N-01B	4.18676	Tumor	BRCA
TCGA-E2-A1IU-01A	2.54683	Tumor	BRCA
TCGA-EW-A1IX-01A	0.844418	Tumor	BRCA
TCGA-A2-A0EV-01A	2.93384	Tumor	BRCA
TCGA-BH-A0BT-11A	0.830335	Normal	BRCA
TCGA-AC-A3W5-01A	2.20248	Tumor	BRCA
TCGA-AR-A2LN-01A	1.23659	Tumor	BRCA
TCGA-E9-A1QZ-01A	3.47313	Tumor	BRCA
TCGA-BH-A8FY-01A	2.02315	Tumor	BRCA
TCGA-AC-A6IX-06A	2.80824	Tumor	BRCA
TCGA-AR-A1AL-01A	2.20511	Tumor	BRCA
TCGA-BH-A42T-01A	2.91639	Tumor	BRCA
TCGA-BH-A0B9-01A	4.19427	Tumor	BRCA
TCGA-BH-A0BS-11A	0.956698	Normal	BRCA
TCGA-AO-A0J8-01A	2.43549	Tumor	BRCA
TCGA-BH-A2L8-01A	1.61586	Tumor	BRCA
TCGA-E9-A1N5-01A	3.58382	Tumor	BRCA
TCGA-A8-A075-01A	2.72219	Tumor	BRCA
TCGA-AN-A0FZ-01A	2.03982	Tumor	BRCA
TCGA-D8-A1XJ-01A	4.19939	Tumor	BRCA
TCGA-E2-A15F-01A	2.23879	Tumor	BRCA
TCGA-A2-A0EP-01A	1.94731	Tumor	BRCA
TCGA-BH-A18K-01A	2.45657	Tumor	BRCA
TCGA-AR-A5QN-01A	2.58552	Tumor	BRCA
TCGA-E9-A244-01A	3.35567	Tumor	BRCA
TCGA-A8-A0A2-01A	1.88864	Tumor	BRCA
TCGA-B6-A40C-01A	3.50036	Tumor	BRCA
TCGA-AR-A2LQ-01A	1.63485	Tumor	BRCA
TCGA-EW-A1J6-01A	3.15834	Tumor	BRCA
TCGA-EW-A1IZ-01A	2.34202	Tumor	BRCA
TCGA-AC-A2FG-01A	2.38446	Tumor	BRCA
TCGA-A8-A09Z-01A	2.64677	Tumor	BRCA
TCGA-EW-A1P1-01A	1.55904	Tumor	BRCA
TCGA-A8-A0A9-01A	2.37018	Tumor	BRCA
TCGA-BH-A0DT-01A	2.12839	Tumor	BRCA
TCGA-A2-A0T2-01A	2.82159	Tumor	BRCA
TCGA-A7-A4SA-01A	3.02301	Tumor	BRCA
TCGA-D8-A27F-01A	2.42967	Tumor	BRCA
TCGA-D8-A146-01A	2.10038	Tumor	BRCA
TCGA-D8-A27E-01A	0.846936	Tumor	BRCA
TCGA-C8-A138-01A	2.97629	Tumor	BRCA
TCGA-E2-A14V-01A	3.73311	Tumor	BRCA
TCGA-AC-A5EH-01A	1.73357	Tumor	BRCA
TCGA-A2-A0YL-01A	2.15454	Tumor	BRCA
TCGA-E2-A1LK-01A	1.99137	Tumor	BRCA
TCGA-D8-A13Z-01A	4.03374	Tumor	BRCA
TCGA-D8-A27V-01A	1.89808	Tumor	BRCA
TCGA-EW-A3U0-01A	3.06378	Tumor	BRCA
TCGA-A2-A4S2-01A	3.22657	Tumor	BRCA
TCGA-D8-A1XV-01A	2.06113	Tumor	BRCA
TCGA-BH-A1F0-01A	2.98788	Tumor	BRCA
TCGA-AN-A0FT-01A	3.48222	Tumor	BRCA
TCGA-A7-A0D9-11A	0.366139	Normal	BRCA
TCGA-E2-A15K-01A	4.93775	Tumor	BRCA
TCGA-BH-A0DL-01A	3.73083	Tumor	BRCA
TCGA-A2-A0EY-01A	2.7357	Tumor	BRCA
TCGA-B6-A0IG-01A	4.10851	Tumor	BRCA
TCGA-BH-A0HI-01A	1.50029	Tumor	BRCA
TCGA-E2-A576-01A	3.29318	Tumor	BRCA
TCGA-BH-A201-01A	1.72929	Tumor	BRCA
TCGA-D8-A1JB-01A	1.68687	Tumor	BRCA
TCGA-A1-A0SN-01A	2.1263	Tumor	BRCA
TCGA-A8-A08A-01A	2.39802	Tumor	BRCA
TCGA-A2-A0YI-01A	1.43345	Tumor	BRCA
TCGA-AR-A1AN-01A	1.18272	Tumor	BRCA
TCGA-AR-A2LM-01A	1.78343	Tumor	BRCA
TCGA-AR-A5QQ-01A	2.70537	Tumor	BRCA
TCGA-AR-A0TR-01A	1.63106	Tumor	BRCA
TCGA-GM-A3XG-01A	1.64877	Tumor	BRCA
TCGA-BH-A1FC-01A	3.93439	Tumor	BRCA
TCGA-A2-A0D1-01A	3.10936	Tumor	BRCA
TCGA-EW-A1P7-01A	1.37915	Tumor	BRCA
TCGA-AR-A1AP-01A	2.48441	Tumor	BRCA
TCGA-E2-A150-01A	2.29523	Tumor	BRCA
TCGA-EW-A2FW-01A	4.03797	Tumor	BRCA
TCGA-AR-A1AV-01A	2.79596	Tumor	BRCA
TCGA-A2-A0T1-01A	3.28761	Tumor	BRCA
TCGA-BH-A0BM-11A	1.7287	Normal	BRCA
TCGA-BH-A0C0-11A	1.05029	Normal	BRCA
TCGA-AO-A0JF-01A	1.52649	Tumor	BRCA
TCGA-OL-A6VR-01A	1.8689	Tumor	BRCA
TCGA-A8-A090-01A	2.24302	Tumor	BRCA
TCGA-BH-A0BG-01A	3.0302	Tumor	BRCA
TCGA-AO-A1KP-01A	4.71904	Tumor	BRCA
TCGA-LL-A441-01A	2.52618	Tumor	BRCA
TCGA-C8-A133-01A	1.36393	Tumor	BRCA
TCGA-BH-A8FZ-01A	1.767	Tumor	BRCA
TCGA-E2-A1II-01A	2.80128	Tumor	BRCA
TCGA-EW-A6SC-01A	2.50738	Tumor	BRCA
TCGA-AN-A0XT-01A	1.86687	Tumor	BRCA
TCGA-BH-A0RX-01A	3.10212	Tumor	BRCA
TCGA-A8-A08X-01A	2.99934	Tumor	BRCA
TCGA-AO-A03V-01A	2.3042	Tumor	BRCA
TCGA-EW-A1PH-01A	4.59173	Tumor	BRCA
TCGA-A2-A0ST-01A	3.18864	Tumor	BRCA
TCGA-BH-A0BC-01A	2.86459	Tumor	BRCA
TCGA-E9-A1NH-01A	1.97313	Tumor	BRCA
TCGA-B6-A0X5-01A	4.45813	Tumor	BRCA
TCGA-AC-A4ZE-01A	2.31472	Tumor	BRCA
TCGA-A8-A07Z-01A	3.85924	Tumor	BRCA
TCGA-OL-A66P-01A	2.55279	Tumor	BRCA
TCGA-E2-A1LE-01A	1.84053	Tumor	BRCA
TCGA-C8-A8HR-01A	2.72852	Tumor	BRCA
TCGA-BH-A0H7-11A	1.40599	Normal	BRCA
TCGA-A8-A09T-01A	3.41581	Tumor	BRCA
TCGA-BH-A0HB-01A	3.05629	Tumor	BRCA
TCGA-A8-A08G-01A	2.66536	Tumor	BRCA
TCGA-A2-A0EQ-01A	2.51219	Tumor	BRCA
TCGA-A8-A081-01A	3.78489	Tumor	BRCA
TCGA-AO-A1KO-01A	0.928085	Tumor	BRCA
TCGA-BH-A0HW-01A	1.50597	Tumor	BRCA
TCGA-OL-A66H-01A	2.53858	Tumor	BRCA
TCGA-A2-A0T0-01A	2.67355	Tumor	BRCA
TCGA-A7-A0DB-11A	1.02833	Normal	BRCA
TCGA-AN-A04C-01A	4.38597	Tumor	BRCA
TCGA-E2-A573-01A	3.66058	Tumor	BRCA
TCGA-AN-A0XS-01A	2.97195	Tumor	BRCA
TCGA-D8-A3Z6-01A	2.10751	Tumor	BRCA
TCGA-EW-A3E8-01B	2.004	Tumor	BRCA
TCGA-C8-A137-01A	1.36545	Tumor	BRCA
TCGA-GM-A4E0-01A	2.00417	Tumor	BRCA
TCGA-E2-A1B4-01A	1.46096	Tumor	BRCA
TCGA-EW-A2FS-01A	3.50726	Tumor	BRCA
TCGA-S3-A6ZG-01A	3.66017	Tumor	BRCA
TCGA-BH-A209-11A	1.24613	Normal	BRCA
TCGA-GM-A3XN-01A	2.65778	Tumor	BRCA
TCGA-EW-A1P8-01A	3.95143	Tumor	BRCA
TCGA-E2-A156-01A	2.47047	Tumor	BRCA
TCGA-AC-A8OP-01A	1.23073	Tumor	BRCA
TCGA-AN-A0FS-01A	2.29487	Tumor	BRCA
TCGA-E2-A15M-11A	0.976137	Normal	BRCA
TCGA-B6-A0IM-01A	1.48036	Tumor	BRCA
TCGA-E9-A3HO-01A	4.96886	Tumor	BRCA
TCGA-E2-A1L7-11A	1.21002	Normal	BRCA
TCGA-D8-A27K-01A	2.27252	Tumor	BRCA
TCGA-E9-A2JT-01A	2.53448	Tumor	BRCA
TCGA-BH-A1EN-11A	0.706372	Normal	BRCA
TCGA-GM-A2DK-01A	2.29435	Tumor	BRCA
TCGA-AR-A1AK-01A	2.82105	Tumor	BRCA
TCGA-E2-A15R-01A	2.55087	Tumor	BRCA
TCGA-BH-A18Q-01A	4.03182	Tumor	BRCA
TCGA-BH-A0DV-11A	0.289341	Normal	BRCA
TCGA-E2-A153-01A	1.62172	Tumor	BRCA
TCGA-BH-A0BT-01A	3.73605	Tumor	BRCA
TCGA-E9-A54Y-01A	3.22254	Tumor	BRCA
TCGA-E2-A14Q-01A	3.06395	Tumor	BRCA
TCGA-BH-A0HN-01A	2.73945	Tumor	BRCA
TCGA-E2-A1IK-01A	1.76393	Tumor	BRCA
TCGA-E2-A10C-01A	3.92192	Tumor	BRCA
TCGA-A8-A095-01A	4.47177	Tumor	BRCA
TCGA-BH-A0DH-11A	0.943595	Normal	BRCA
TCGA-A7-A0DB-01A	2.15619	Tumor	BRCA
TCGA-BH-A18J-01A	2.18355	Tumor	BRCA
TCGA-BH-A28O-01A	1.39595	Tumor	BRCA
TCGA-AC-A3TN-01A	2.12569	Tumor	BRCA
TCGA-A7-A13E-01A	2.15748	Tumor	BRCA
TCGA-BH-A0W5-01A	2.27311	Tumor	BRCA
TCGA-GM-A2DD-01A	2.98709	Tumor	BRCA
TCGA-AN-A0XV-01A	2.47514	Tumor	BRCA
TCGA-E2-A1IL-01A	1.846	Tumor	BRCA
TCGA-EW-A2FR-01A	2.38718	Tumor	BRCA
TCGA-3C-AAAU-01A	2.02126	Tumor	BRCA
TCGA-AR-A24W-01A	1.35191	Tumor	BRCA
TCGA-OL-A5RZ-01A	3.22676	Tumor	BRCA
TCGA-E9-A1RB-01A	5.15015	Tumor	BRCA
TCGA-AN-A0AJ-01A	4.12862	Tumor	BRCA
TCGA-AR-A1AT-01A	2.37155	Tumor	BRCA
TCGA-BH-A1FD-11B	0.841773	Normal	BRCA
TCGA-A8-A09Q-01A	2.51971	Tumor	BRCA
TCGA-A8-A083-01A	2.01224	Tumor	BRCA
TCGA-AN-A0XL-01A	3.127	Tumor	BRCA
TCGA-E9-A1RC-01A	3.37988	Tumor	BRCA
TCGA-D8-A27I-01A	1.95635	Tumor	BRCA
TCGA-A2-A04Y-01A	2.30885	Tumor	BRCA
TCGA-PE-A5DC-01A	2.60526	Tumor	BRCA
TCGA-OL-A5D8-01A	3.28774	Tumor	BRCA
TCGA-A7-A26E-01A	1.73888	Tumor	BRCA
TCGA-AN-A0FL-01A	3.03527	Tumor	BRCA
TCGA-A8-A0A1-01A	2.39444	Tumor	BRCA
TCGA-AN-A0FN-01A	1.97607	Tumor	BRCA
TCGA-D8-A1J9-01A	2.87641	Tumor	BRCA
TCGA-BH-A1EO-01A	1.9693	Tumor	BRCA
TCGA-B6-A0I2-01A	3.62158	Tumor	BRCA
TCGA-E9-A5UP-01A	2.10148	Tumor	BRCA
TCGA-A2-A0T5-01A	2.85191	Tumor	BRCA
TCGA-A7-A0DA-01A	2.28151	Tumor	BRCA
TCGA-BH-A1FJ-11B	1.24903	Normal	BRCA
TCGA-B6-A0IC-01A	1.96539	Tumor	BRCA
TCGA-BH-A1FH-11B	0.932833	Normal	BRCA
TCGA-BH-A5J0-01A	2.60682	Tumor	BRCA
TCGA-A2-A0CY-01A	3.28308	Tumor	BRCA
TCGA-E9-A245-01A	1.4796	Tumor	BRCA
TCGA-GM-A3NW-01A	1.53464	Tumor	BRCA
TCGA-A1-A0SB-01A	1.87747	Tumor	BRCA
TCGA-BH-A0B8-11A	0.265352	Normal	BRCA
TCGA-OL-A66N-01A	1.94839	Tumor	BRCA
TCGA-A2-A0CQ-01A	3.04806	Tumor	BRCA
TCGA-C8-A1HG-01A	2.36449	Tumor	BRCA
TCGA-AC-A2BK-01A	2.32909	Tumor	BRCA
TCGA-A8-A08J-01A	3.11207	Tumor	BRCA
TCGA-A8-A09V-01A	2.94641	Tumor	BRCA
TCGA-A2-A0T3-01A	3.75678	Tumor	BRCA
TCGA-AC-A2FM-11B	1.16964	Normal	BRCA
TCGA-C8-A1HK-01A	2.53989	Tumor	BRCA
TCGA-AN-A04A-01A	2.96286	Tumor	BRCA
TCGA-E9-A1RG-01A	4.32902	Tumor	BRCA
TCGA-JL-A3YW-01A	2.49765	Tumor	BRCA
TCGA-E2-A154-01A	3.59761	Tumor	BRCA
TCGA-A2-A04U-01A	1.58155	Tumor	BRCA
TCGA-BH-A0EE-01A	4.89561	Tumor	BRCA
TCGA-BH-A0H5-01A	2.11925	Tumor	BRCA
TCGA-EW-A1IW-01A	3.43328	Tumor	BRCA
TCGA-AO-A0J4-01A	2.47274	Tumor	BRCA
TCGA-A7-A3J1-01A	2.59611	Tumor	BRCA
TCGA-E9-A243-01A	3.36963	Tumor	BRCA
TCGA-C8-A134-01A	3.55555	Tumor	BRCA
TCGA-BH-A1FC-11A	0.962608	Normal	BRCA
TCGA-D8-A1Y1-01A	3.56025	Tumor	BRCA
TCGA-AO-A12A-01A	2.51208	Tumor	BRCA
TCGA-E2-A108-01A	2.6418	Tumor	BRCA
TCGA-BH-A1F8-11B	1.25249	Normal	BRCA
TCGA-BH-A0E1-01A	2.14252	Tumor	BRCA
TCGA-BH-A204-11A	0.668777	Normal	BRCA
TCGA-E2-A14U-01A	1.39452	Tumor	BRCA
TCGA-BH-A0HL-01A	2.45729	Tumor	BRCA
TCGA-E9-A229-01A	2.21247	Tumor	BRCA
TCGA-A8-A08T-01A	2.0744	Tumor	BRCA
TCGA-E9-A1RF-01A	2.29269	Tumor	BRCA
TCGA-A2-A04T-01A	3.43567	Tumor	BRCA
TCGA-E2-A15P-01A	2.52924	Tumor	BRCA
TCGA-C8-A3M8-01A	2.39636	Tumor	BRCA
TCGA-LL-A5YO-01A	3.589	Tumor	BRCA
TCGA-OL-A66L-01A	2.48833	Tumor	BRCA
TCGA-OL-A66K-01A	2.65888	Tumor	BRCA
TCGA-E2-A1LG-01A	4.71295	Tumor	BRCA
TCGA-E2-A1LS-01A	1.42973	Tumor	BRCA
TCGA-BH-A0H5-11A	0.693039	Normal	BRCA
TCGA-A7-A426-01A	2.78662	Tumor	BRCA
TCGA-BH-A0B7-01A	2.20323	Tumor	BRCA
TCGA-AC-A2FO-01A	1.72817	Tumor	BRCA
TCGA-D8-A27L-01A	2.33977	Tumor	BRCA
TCGA-AC-A2FF-01A	1.87427	Tumor	BRCA
TCGA-GM-A2D9-01A	2.03934	Tumor	BRCA
TCGA-A2-A0D3-01A	1.6285	Tumor	BRCA
TCGA-A7-A0CH-11A	1.05825	Normal	BRCA
TCGA-A2-A0EO-01A	1.92188	Tumor	BRCA
TCGA-E9-A1NA-11A	0.691416	Normal	BRCA
TCGA-A2-A0T7-01A	2.3149	Tumor	BRCA
TCGA-OL-A6VO-01A	5.09048	Tumor	BRCA
TCGA-BH-A0EI-01A	1.15718	Tumor	BRCA
TCGA-A8-A094-01A	2.54204	Tumor	BRCA
TCGA-A8-A092-01A	4.01264	Tumor	BRCA
TCGA-AC-A3W6-01A	1.77439	Tumor	BRCA
TCGA-BH-A0BA-01A	3.66483	Tumor	BRCA
TCGA-EW-A1OX-01A	2.78888	Tumor	BRCA
TCGA-A2-A0CR-01A	2.75644	Tumor	BRCA
TCGA-D8-A1JD-01A	2.38768	Tumor	BRCA
TCGA-C8-A26X-01A	2.55111	Tumor	BRCA
TCGA-E9-A1RC-11A	0.472718	Normal	BRCA
TCGA-A1-A0SE-01A	2.81265	Tumor	BRCA
TCGA-A7-A4SF-01A	4.17924	Tumor	BRCA
TCGA-OL-A66O-01A	3.25417	Tumor	BRCA
TCGA-C8-A26W-01A	3.32732	Tumor	BRCA
TCGA-E2-A9RU-01A	4.01516	Tumor	BRCA
TCGA-AN-A0FW-01A	2.52982	Tumor	BRCA
TCGA-D8-A1JC-01A	3.69762	Tumor	BRCA
TCGA-C8-A12V-01A	2.84944	Tumor	BRCA
TCGA-A2-A04P-01A	3.70017	Tumor	BRCA
TCGA-BH-A0W3-01A	3.67912	Tumor	BRCA
TCGA-BH-A0B5-01A	3.94291	Tumor	BRCA
TCGA-S3-AA10-01A	2.14281	Tumor	BRCA
TCGA-BH-A0B0-01A	2.54381	Tumor	BRCA
TCGA-E2-A574-01A	2.50637	Tumor	BRCA
TCGA-AN-A0XN-01A	1.78902	Tumor	BRCA
TCGA-AN-A0XW-01A	2.56174	Tumor	BRCA
TCGA-BH-A0DK-11A	1.04939	Normal	BRCA
TCGA-C8-A1HF-01A	3.80352	Tumor	BRCA
TCGA-BH-A0AU-11A	1.24611	Normal	BRCA
TCGA-AR-A2LO-01A	3.05932	Tumor	BRCA
TCGA-D8-A1XA-01A	2.59291	Tumor	BRCA
TCGA-BH-A0BL-01A	3.74472	Tumor	BRCA
TCGA-EW-A1J2-01A	1.37014	Tumor	BRCA
TCGA-BH-A0AZ-01A	1.45252	Tumor	BRCA
TCGA-E9-A227-01A	1.78236	Tumor	BRCA
TCGA-A2-A0D2-01A	2.75911	Tumor	BRCA
TCGA-D8-A1XM-01A	2.17948	Tumor	BRCA
TCGA-D8-A1Y3-01A	4.04391	Tumor	BRCA
TCGA-C8-A275-01A	3.21613	Tumor	BRCA
TCGA-E2-A3DX-01A	1.0731	Tumor	BRCA
TCGA-C8-A1HM-01A	4.68721	Tumor	BRCA
TCGA-E2-A158-01A	2.06997	Tumor	BRCA
TCGA-AR-A0TP-01A	2.89283	Tumor	BRCA
TCGA-A7-A26F-01B	1.06469	Tumor	BRCA
TCGA-A2-A1FW-01A	2.41184	Tumor	BRCA
TCGA-E2-A15A-06A	2.31304	Tumor	BRCA
TCGA-BH-A0C7-01B	3.85123	Tumor	BRCA
TCGA-AR-A1AJ-01A	3.34036	Tumor	BRCA
TCGA-E9-A1R5-01A	2.37484	Tumor	BRCA
TCGA-A8-A09A-01A	1.73445	Tumor	BRCA
TCGA-GM-A2DC-01A	1.43179	Tumor	BRCA
TCGA-A2-A3KC-01A	2.57592	Tumor	BRCA
TCGA-AO-A0J9-01A	4.0374	Tumor	BRCA
TCGA-E2-A14Y-01A	2.93987	Tumor	BRCA
TCGA-D8-A4Z1-01A	1.40875	Tumor	BRCA
TCGA-3C-AALI-01A	3.30369	Tumor	BRCA
TCGA-E2-A159-01A	2.50633	Tumor	BRCA
TCGA-E2-A155-01A	2.26772	Tumor	BRCA
TCGA-A8-A082-01A	2.46046	Tumor	BRCA
TCGA-E2-A14R-01A	3.17924	Tumor	BRCA
TCGA-D8-A141-01A	1.93634	Tumor	BRCA
TCGA-BH-A204-01A	3.80088	Tumor	BRCA
TCGA-E2-A109-01A	2.28995	Tumor	BRCA
TCGA-C8-A1HJ-01A	4.86427	Tumor	BRCA
TCGA-BH-A0C1-01B	2.83991	Tumor	BRCA
TCGA-E9-A1RI-11A	0.1606	Normal	BRCA
TCGA-D8-A1Y2-01A	3.24433	Tumor	BRCA
TCGA-E2-A1LH-11A	0.953345	Normal	BRCA
TCGA-AR-A2LJ-01A	2.17368	Tumor	BRCA
TCGA-AC-A2QH-01B	1.93031	Tumor	BRCA
TCGA-A2-A0YK-01A	1.92195	Tumor	BRCA
TCGA-E9-A22H-01A	3.87126	Tumor	BRCA
TCGA-E2-A1L8-01A	3.23296	Tumor	BRCA
TCGA-BH-A0B8-01A	2.77485	Tumor	BRCA
TCGA-BH-A18G-01A	1.99876	Tumor	BRCA
TCGA-JL-A3YX-01A	2.38047	Tumor	BRCA
TCGA-S3-AA17-01A	2.9264	Tumor	BRCA
TCGA-BH-A0B5-11A	0.279095	Normal	BRCA
TCGA-E2-A15M-01A	2.4427	Tumor	BRCA
TCGA-E2-A56Z-01A	3.30167	Tumor	BRCA
TCGA-A7-A0CH-01A	1.96624	Tumor	BRCA
TCGA-AR-A0TZ-01A	2.61923	Tumor	BRCA
TCGA-E2-A15I-01A	2.09089	Tumor	BRCA
TCGA-BH-A0B4-01A	2.42949	Tumor	BRCA
TCGA-E2-A15K-06A	4.28354	Tumor	BRCA
TCGA-BH-A0WA-01A	3.90527	Tumor	BRCA
TCGA-A2-A0ET-01A	2.8483	Tumor	BRCA
TCGA-OL-A5RW-01A	3.66309	Tumor	BRCA
TCGA-A7-A13D-01B	1.80926	Tumor	BRCA
TCGA-AN-A0FD-01A	3.0423	Tumor	BRCA
TCGA-BH-A0H7-01A	1.52403	Tumor	BRCA
TCGA-LL-A5YL-01A	4.12219	Tumor	BRCA
TCGA-A2-A0D0-01A	3.43577	Tumor	BRCA
TCGA-AO-A129-01A	2.47715	Tumor	BRCA
TCGA-BH-A1EW-01A	2.19834	Tumor	BRCA
TCGA-AO-A03M-01B	2.89684	Tumor	BRCA
TCGA-B6-A0RP-01A	2.65457	Tumor	BRCA
TCGA-E2-A15T-01A	1.73296	Tumor	BRCA
TCGA-A2-A4RW-01A	2.06614	Tumor	BRCA
TCGA-AC-A2FF-11A	1.8515	Normal	BRCA
TCGA-BH-A0B7-11A	1.86114	Normal	BRCA
TCGA-A8-A08O-01A	1.3348	Tumor	BRCA
TCGA-BH-A18I-01A	2.8205	Tumor	BRCA
TCGA-BH-A0BM-01A	1.29652	Tumor	BRCA
TCGA-E2-A14N-01A	2.84171	Tumor	BRCA
TCGA-5L-AAT0-01A	1.95335	Tumor	BRCA
TCGA-E9-A1NG-11A	0.764819	Normal	BRCA
TCGA-BH-A6R9-01A	1.5269	Tumor	BRCA
TCGA-EW-A1PG-01A	1.08887	Tumor	BRCA
TCGA-AN-A03Y-01A	2.66812	Tumor	BRCA
TCGA-BH-A0DL-11A	1.51941	Normal	BRCA
TCGA-B6-A0RT-01A	3.31216	Tumor	BRCA
TCGA-A2-A25D-01A	2.79382	Tumor	BRCA
TCGA-A7-A56D-01A	3.17588	Tumor	BRCA
TCGA-D8-A73W-01A	2.26387	Tumor	BRCA
TCGA-AO-A0J5-01A	1.97256	Tumor	BRCA
TCGA-E9-A1R7-11A	0.660013	Normal	BRCA
TCGA-A2-A1G6-01A	0.886206	Tumor	BRCA
TCGA-AC-A3OD-01B	1.79937	Tumor	BRCA
TCGA-BH-A0H9-11A	0.195024	Normal	BRCA
TCGA-A7-A0CJ-01A	3.30222	Tumor	BRCA
TCGA-A8-A07U-01A	3.14395	Tumor	BRCA
TCGA-D8-A1XS-01A	2.81478	Tumor	BRCA
TCGA-B6-A0I8-01A	2.24356	Tumor	BRCA
TCGA-LL-A5YM-01A	3.70189	Tumor	BRCA
TCGA-E2-A15E-01A	2.72804	Tumor	BRCA
TCGA-D8-A27G-01A	2.50995	Tumor	BRCA
TCGA-BH-A1EX-01A	2.45054	Tumor	BRCA
TCGA-A8-A076-01A	2.92616	Tumor	BRCA
TCGA-EW-A1OV-01A	3.044	Tumor	BRCA
TCGA-B6-A0X7-01A	1.44908	Tumor	BRCA
TCGA-B6-A0WT-01A	2.13612	Tumor	BRCA
TCGA-A2-A4S3-01A	3.99388	Tumor	BRCA
TCGA-BH-A0BZ-01A	3.04736	Tumor	BRCA
TCGA-OL-A5RU-01A	1.79171	Tumor	BRCA
TCGA-D8-A73U-01A	2.16899	Tumor	BRCA
TCGA-A2-A0YT-01A	3.50379	Tumor	BRCA
TCGA-A1-A0SK-01A	3.44043	Tumor	BRCA
TCGA-E9-A295-01A	2.83131	Tumor	BRCA
TCGA-AR-A1AR-01A	2.44786	Tumor	BRCA
TCGA-D8-A1XY-01A	1.99424	Tumor	BRCA
TCGA-LL-A8F5-01A	4.39619	Tumor	BRCA
TCGA-E9-A1R6-01A	3.4019	Tumor	BRCA
TCGA-BH-A1FL-01A	2.83271	Tumor	BRCA
TCGA-BH-A18S-11A	0.668852	Normal	BRCA
TCGA-E9-A1RE-01A	2.08968	Tumor	BRCA
TCGA-BH-A0BC-11A	1.14674	Normal	BRCA
TCGA-D8-A1JN-01A	1.67654	Tumor	BRCA
TCGA-D8-A145-01A	1.52283	Tumor	BRCA
TCGA-B6-A0IK-01A	2.79443	Tumor	BRCA
TCGA-C8-A1HE-01A	1.72652	Tumor	BRCA
TCGA-A8-A0AB-01A	3.76238	Tumor	BRCA
TCGA-EW-A1J3-01A	3.40103	Tumor	BRCA
TCGA-GI-A2C8-01A	1.19899	Tumor	BRCA
TCGA-A2-A0YJ-01A	2.38645	Tumor	BRCA
TCGA-A8-A0A7-01A	2.56802	Tumor	BRCA
TCGA-A8-A08L-01A	4.476	Tumor	BRCA
TCGA-BH-A0H6-01A	2.52396	Tumor	BRCA
TCGA-D8-A1XL-01A	4.27157	Tumor	BRCA
TCGA-E2-A10B-01A	3.7554	Tumor	BRCA
TCGA-E9-A228-01A	3.73596	Tumor	BRCA
TCGA-A2-A3KD-01A	1.18987	Tumor	BRCA
TCGA-AQ-A7U7-01A	2.31522	Tumor	BRCA
TCGA-AO-A1KS-01A	3.2709	Tumor	BRCA
TCGA-A7-A0DC-01B	0.984805	Tumor	BRCA
TCGA-BH-A0EB-01A	2.76304	Tumor	BRCA
TCGA-E2-A1LB-11A	1.5045	Normal	BRCA
TCGA-C8-A12W-01A	3.07273	Tumor	BRCA
TCGA-AR-A24L-01A	2.74058	Tumor	BRCA
TCGA-EW-A1PB-01A	2.95737	Tumor	BRCA
TCGA-D8-A1JJ-01A	3.25653	Tumor	BRCA
TCGA-C8-A12Z-01A	2.32478	Tumor	BRCA
TCGA-A8-A09X-01A	2.39705	Tumor	BRCA
TCGA-AC-A62Y-01A	3.4145	Tumor	BRCA
TCGA-AC-A3YJ-01A	1.36497	Tumor	BRCA
TCGA-E9-A22G-01A	3.00907	Tumor	BRCA
TCGA-GM-A5PX-01A	1.13402	Tumor	BRCA
TCGA-A2-A4RX-01A	2.97696	Tumor	BRCA
TCGA-BH-A0HK-11A	0.839892	Normal	BRCA
TCGA-B6-A0WW-01A	2.41183	Tumor	BRCA
TCGA-A2-A0SV-01A	3.48062	Tumor	BRCA
TCGA-AR-A24U-01A	1.89267	Tumor	BRCA
TCGA-B6-A0X0-01A	2.65862	Tumor	BRCA
TCGA-BH-A0EA-01A	1.47766	Tumor	BRCA
TCGA-LL-A440-01A	1.77247	Tumor	BRCA
TCGA-A1-A0SQ-01A	1.55062	Tumor	BRCA
TCGA-A8-A09N-01A	2.81437	Tumor	BRCA
TCGA-AC-A3QQ-01B	2.56144	Tumor	BRCA
TCGA-E2-A1BC-11A	0.383777	Normal	BRCA
TCGA-BH-A18V-06A	3.65265	Tumor	BRCA
TCGA-BH-A18H-01A	2.45727	Tumor	BRCA
TCGA-E2-A1LH-01A	2.46554	Tumor	BRCA
TCGA-C8-A27A-01A	4.30354	Tumor	BRCA
TCGA-E9-A1R4-01A	3.5828	Tumor	BRCA
TCGA-A2-A3XU-01A	2.60669	Tumor	BRCA
TCGA-HN-A2NL-01A	3.44171	Tumor	BRCA
TCGA-BH-A0BO-01A	0.434667	Tumor	BRCA
TCGA-D8-A1Y0-01A	2.19191	Tumor	BRCA
TCGA-B6-A40B-01A	4.17228	Tumor	BRCA
TCGA-PL-A8LX-01A	1.60947	Tumor	BRCA
TCGA-B6-A1KF-01A	3.66856	Tumor	BRCA
TCGA-AO-A0J7-01A	4.34677	Tumor	BRCA
TCGA-EW-A2FV-01A	3.12576	Tumor	BRCA
TCGA-AR-A252-01A	2.74118	Tumor	BRCA
TCGA-AN-A0XR-01A	4.11635	Tumor	BRCA
TCGA-A2-A0YC-01A	2.39935	Tumor	BRCA
TCGA-A8-A07P-01A	2.22736	Tumor	BRCA
TCGA-BH-A1FR-11B	1.02428	Normal	BRCA
TCGA-E9-A3X8-01A	2.42913	Tumor	BRCA
TCGA-AC-A2B8-01A	2.65809	Tumor	BRCA
TCGA-AO-A0JL-01A	5.8459	Tumor	BRCA
TCGA-BH-A1FB-11A	0.637633	Normal	BRCA
TCGA-D8-A27W-01A	2.52729	Tumor	BRCA
TCGA-B6-A0RO-01A	1.90315	Tumor	BRCA
TCGA-BH-A0DE-01A	2.56166	Tumor	BRCA
TCGA-D8-A147-01A	3.36818	Tumor	BRCA
TCGA-BH-A202-01A	3.65953	Tumor	BRCA
TCGA-BH-A18R-01A	3.51842	Tumor	BRCA
TCGA-BH-A0HA-11A	1.73693	Normal	BRCA
TCGA-B6-A0RV-01A	1.9108	Tumor	BRCA
TCGA-D8-A27P-01A	1.10769	Tumor	BRCA
TCGA-BH-A0W7-01A	2.69774	Tumor	BRCA
TCGA-BH-A0E1-11A	1.06276	Normal	BRCA
TCGA-AC-A7VB-01A	2.84067	Tumor	BRCA
TCGA-AN-A046-01A	2.10252	Tumor	BRCA
TCGA-A2-A0SX-01A	2.90972	Tumor	BRCA
TCGA-A8-A06N-01A	2.34251	Tumor	BRCA
TCGA-BH-A8G0-01A	1.26962	Tumor	BRCA
TCGA-BH-A0HP-01A	1.63517	Tumor	BRCA
TCGA-BH-A18U-01A	4.29166	Tumor	BRCA
TCGA-AN-A0AS-01A	1.25159	Tumor	BRCA
TCGA-AO-A0JC-01A	2.93009	Tumor	BRCA
TCGA-BH-A1F2-01A	3.34129	Tumor	BRCA
TCGA-BH-A18M-01A	2.70104	Tumor	BRCA
TCGA-C8-A12L-01A	3.1492	Tumor	BRCA
TCGA-E9-A1R7-01A	2.28665	Tumor	BRCA
TCGA-BH-A1FH-01A	1.25576	Tumor	BRCA
TCGA-AR-A24V-01A	2.24086	Tumor	BRCA
TCGA-AC-A6IX-01A	2.15014	Tumor	BRCA
TCGA-D8-A1JH-01A	1.48221	Tumor	BRCA
TCGA-BH-A1FE-01A	2.88653	Tumor	BRCA
TCGA-A2-A25C-01A	2.87205	Tumor	BRCA
TCGA-B6-A0IQ-01A	4.74013	Tumor	BRCA
TCGA-AO-A0JI-01A	2.34726	Tumor	BRCA
TCGA-AC-A2FB-11A	0.950577	Normal	BRCA
TCGA-B6-A0IA-01A	3.1487	Tumor	BRCA
TCGA-E2-A1L7-01A	3.33602	Tumor	BRCA
TCGA-BH-A18F-01A	3.43261	Tumor	BRCA
TCGA-C8-A1HI-01A	2.37756	Tumor	BRCA
TCGA-A2-A0YD-01A	1.98994	Tumor	BRCA
TCGA-A8-A06U-01A	3.16221	Tumor	BRCA
TCGA-BH-A18S-01A	1.12883	Tumor	BRCA
TCGA-A8-A08S-01A	3.36016	Tumor	BRCA
TCGA-A8-A08C-01A	2.21418	Tumor	BRCA
TCGA-C8-A1HO-01A	2.29031	Tumor	BRCA
TCGA-AO-A0JG-01A	1.98556	Tumor	BRCA
TCGA-E9-A1NF-01A	2.57389	Tumor	BRCA
TCGA-AO-A0J6-01A	3.48172	Tumor	BRCA
TCGA-LL-A5YP-01A	3.70601	Tumor	BRCA
TCGA-BH-A0DI-01A	1.51631	Tumor	BRCA
TCGA-BH-A1FJ-01A	3.34585	Tumor	BRCA
TCGA-UU-A93S-01A	3.96722	Tumor	BRCA
TCGA-A2-A0YE-01A	4.12422	Tumor	BRCA
TCGA-BH-A209-01A	2.76243	Tumor	BRCA
TCGA-OL-A5RX-01A	2.36673	Tumor	BRCA
TCGA-E2-A15D-01A	2.24159	Tumor	BRCA
TCGA-D8-A27H-01A	1.71851	Tumor	BRCA
TCGA-BH-A1F6-01A	3.17725	Tumor	BRCA
TCGA-A1-A0SD-01A	2.02883	Tumor	BRCA
TCGA-A7-A26J-01B	2.67362	Tumor	BRCA
TCGA-D8-A1XC-01A	1.76085	Tumor	BRCA
TCGA-A2-A04R-01A	3.10765	Tumor	BRCA
TCGA-LD-A66U-01A	2.73822	Tumor	BRCA
TCGA-E2-A15O-01A	3.80672	Tumor	BRCA
TCGA-AR-A24T-01A	2.14934	Tumor	BRCA
TCGA-BH-A0HO-01A	1.6017	Tumor	BRCA
TCGA-A7-A6VW-01A	3.60046	Tumor	BRCA
TCGA-E2-A153-11A	0.903401	Normal	BRCA
TCGA-BH-A0HY-01A	2.70612	Tumor	BRCA
TCGA-3C-AALJ-01A	2.24727	Tumor	BRCA
TCGA-BH-AB28-01A	2.93257	Tumor	BRCA
TCGA-A7-A0CG-01A	1.79596	Tumor	BRCA
TCGA-A8-A08H-01A	1.76239	Tumor	BRCA
TCGA-B6-A0WV-01A	2.53662	Tumor	BRCA
TCGA-D8-A1XF-01A	3.37492	Tumor	BRCA
TCGA-BH-A0BQ-01A	2.59562	Tumor	BRCA
TCGA-E9-A1RF-11A	0.272634	Normal	BRCA
TCGA-EW-A1PC-01B	3.90441	Tumor	BRCA
TCGA-A8-A08I-01A	4.53334	Tumor	BRCA
TCGA-B6-A0X4-01A	1.14791	Tumor	BRCA
TCGA-E9-A2JS-01A	3.50882	Tumor	BRCA
TCGA-A8-A096-01A	2.24757	Tumor	BRCA
TCGA-BH-A1F6-11B	0.81918	Normal	BRCA
TCGA-B6-A0WY-01A	2.23209	Tumor	BRCA
TCGA-BH-A18V-11A	1.31772	Normal	BRCA
TCGA-A8-A09E-01A	3.54215	Tumor	BRCA
TCGA-BH-A1ES-06A	0.86416	Tumor	BRCA
TCGA-EW-A1OW-01A	3.44836	Tumor	BRCA
TCGA-D8-A1XD-01A	1.98507	Tumor	BRCA
TCGA-E9-A54X-01A	2.36255	Tumor	BRCA
TCGA-B6-A0RG-01A	2.5651	Tumor	BRCA
TCGA-A8-A097-01A	3.77913	Tumor	BRCA
TCGA-A2-A0CX-01A	4.06217	Tumor	BRCA
TCGA-E9-A5FK-01A	2.14176	Tumor	BRCA
TCGA-BH-A1FG-11B	1.37389	Normal	BRCA
TCGA-C8-A8HQ-01A	2.67731	Tumor	BRCA
TCGA-BH-A0BP-01A	1.81083	Tumor	BRCA
TCGA-B6-A0RL-01A	4.46167	Tumor	BRCA
TCGA-A8-A08F-01A	3.00502	Tumor	BRCA
TCGA-A2-A0CK-01A	2.35359	Tumor	BRCA
TCGA-E9-A1N4-01A	1.44598	Tumor	BRCA
TCGA-D8-A1XZ-01A	3.32361	Tumor	BRCA
TCGA-AR-A1AS-01A	4.32868	Tumor	BRCA
TCGA-BH-A18N-11A	0.372356	Normal	BRCA
TCGA-EW-A424-01A	2.06368	Tumor	BRCA
TCGA-A7-A3RF-01A	1.1161	Tumor	BRCA
TCGA-AR-A24H-01A	4.68066	Tumor	BRCA
TCGA-A8-A06T-01A	3.03558	Tumor	BRCA
TCGA-C8-A1HL-01A	2.61227	Tumor	BRCA
TCGA-D8-A1X8-01A	1.92192	Tumor	BRCA
TCGA-AO-A1KT-01A	2.66806	Tumor	BRCA
TCGA-E2-A15K-11A	1.38738	Normal	BRCA
TCGA-B6-A0RQ-01A	1.49968	Tumor	BRCA
TCGA-AR-A1AQ-01A	2.73115	Tumor	BRCA
TCGA-OL-A5D6-01A	1.52584	Tumor	BRCA
TCGA-A8-A091-01A	2.64743	Tumor	BRCA
TCGA-A7-A4SE-01A	2.94837	Tumor	BRCA
TCGA-AC-A2FE-01A	2.0698	Tumor	BRCA
TCGA-BH-A1F2-11A	0.811704	Normal	BRCA
TCGA-E9-A1ND-11A	1.42123	Normal	BRCA
TCGA-C8-A26Z-01A	1.73817	Tumor	BRCA
TCGA-C8-A12Y-01A	4.10135	Tumor	BRCA
TCGA-A7-A13F-01A	2.73369	Tumor	BRCA
TCGA-BH-A28Q-01A	1.89353	Tumor	BRCA
TCGA-GM-A5PV-01A	1.7771	Tumor	BRCA
TCGA-A7-A4SC-01A	2.07331	Tumor	BRCA
TCGA-A8-A09G-01A	2.88731	Tumor	BRCA
TCGA-A7-A13E-11A	0.381278	Normal	BRCA
TCGA-E2-A15H-01A	3.32479	Tumor	BRCA
TCGA-A7-A13E-01B	2.25264	Tumor	BRCA
TCGA-B6-A0IH-01A	1.87426	Tumor	BRCA
TCGA-A2-A1G4-01A	2.82799	Tumor	BRCA
TCGA-A8-A093-01A	2.14742	Tumor	BRCA
TCGA-C8-A12O-01A	2.646	Tumor	BRCA
TCGA-AO-A1KQ-01A	4.21519	Tumor	BRCA
TCGA-AR-A256-01A	2.63519	Tumor	BRCA
TCGA-OL-A66I-01A	2.89789	Tumor	BRCA
TCGA-C8-A3M7-01A	2.0671	Tumor	BRCA
TCGA-A2-A04W-01A	2.21789	Tumor	BRCA
TCGA-OL-A97C-01A	1.4291	Tumor	BRCA
TCGA-AR-A1AM-01A	1.58614	Tumor	BRCA
TCGA-AR-A2LR-01A	2.05525	Tumor	BRCA
TCGA-EW-A1OZ-01A	3.47412	Tumor	BRCA
TCGA-A1-A0SF-01A	2.75847	Tumor	BRCA
TCGA-A1-A0SJ-01A	2.3484	Tumor	BRCA
TCGA-A7-A13G-11A	0.462743	Normal	BRCA
TCGA-D8-A1JU-01A	0.93213	Tumor	BRCA
TCGA-A8-A07F-01A	2.66065	Tumor	BRCA
TCGA-A7-A6VY-01A	3.82924	Tumor	BRCA
TCGA-BH-A1FU-11A	1.05805	Normal	BRCA
TCGA-BH-A0BZ-11A	0.563757	Normal	BRCA
TCGA-A2-A0CU-01A	2.20039	Tumor	BRCA
TCGA-BH-A18L-11A	0.874256	Normal	BRCA
TCGA-E9-A1NE-01A	2.32963	Tumor	BRCA
TCGA-A7-A0D9-01A	1.491	Tumor	BRCA
TCGA-C8-A12K-01A	3.55055	Tumor	BRCA
TCGA-A8-A07O-01A	2.56473	Tumor	BRCA
TCGA-C8-A12U-01A	3.09404	Tumor	BRCA
TCGA-C8-A8HP-01A	3.71556	Tumor	BRCA
TCGA-A2-A3XV-01A	2.76142	Tumor	BRCA
TCGA-BH-A0AW-01A	3.56196	Tumor	BRCA
TCGA-AN-A0FF-01A	3.25013	Tumor	BRCA
TCGA-AR-A24M-01A	2.76738	Tumor	BRCA
TCGA-BH-A0DP-11A	0.905574	Normal	BRCA
TCGA-E2-A2P6-01A	3.02994	Tumor	BRCA
TCGA-C8-A130-01A	3.69212	Tumor	BRCA
TCGA-C8-A274-01A	2.91174	Tumor	BRCA
TCGA-E9-A1RD-11A	0.482481	Normal	BRCA
TCGA-D8-A73X-01A	2.12656	Tumor	BRCA
TCGA-AO-A0JA-01A	2.54112	Tumor	BRCA
TCGA-LL-A5YN-01A	3.15872	Tumor	BRCA
TCGA-D8-A1XB-01A	2.14634	Tumor	BRCA
TCGA-LL-A6FP-01A	3.25846	Tumor	BRCA
TCGA-A7-A26E-01B	1.79001	Tumor	BRCA
TCGA-A7-A6VX-01A	3.66111	Tumor	BRCA
TCGA-AC-A6IW-01A	2.20584	Tumor	BRCA
TCGA-BH-A0C3-01A	2.39254	Tumor	BRCA
TCGA-E9-A1NF-11A	0.277089	Normal	BRCA
TCGA-E2-A1L9-01A	2.49334	Tumor	BRCA
TCGA-BH-A1EV-01A	2.93043	Tumor	BRCA
TCGA-A2-A3XX-01A	3.90153	Tumor	BRCA
TCGA-E9-A1NA-01A	2.47932	Tumor	BRCA
TCGA-EW-A1OY-01A	3.2063	Tumor	BRCA
TCGA-BH-A0AU-01A	1.93802	Tumor	BRCA
TCGA-B6-A0WS-01A	2.92843	Tumor	BRCA
TCGA-B6-A0I5-01A	2.64959	Tumor	BRCA
TCGA-E2-A14P-01A	3.70789	Tumor	BRCA
TCGA-GM-A2DF-01A	3.07444	Tumor	BRCA
TCGA-AQ-A04H-01B	2.81703	Tumor	BRCA
TCGA-AC-A6NO-01A	3.04292	Tumor	BRCA
TCGA-BH-A0E9-01B	2.16838	Tumor	BRCA
TCGA-E9-A1N4-11A	1.2904	Normal	BRCA
TCGA-BH-A0B1-01A	2.97694	Tumor	BRCA
TCGA-AR-A0TW-01A	2.27952	Tumor	BRCA
TCGA-AN-A0FX-01A	2.21199	Tumor	BRCA
TCGA-BH-A0BD-01A	2.64361	Tumor	BRCA
TCGA-D8-A1JA-01A	2.48607	Tumor	BRCA
TCGA-S3-AA11-01A	2.40311	Tumor	BRCA
TCGA-AO-A03T-01A	3.13583	Tumor	BRCA
TCGA-AC-A3YI-01A	1.21179	Tumor	BRCA
TCGA-BH-A0B2-01A	2.20993	Tumor	BRCA
TCGA-LL-A7T0-01A	4.03474	Tumor	BRCA
TCGA-BH-A0DH-01A	3.98412	Tumor	BRCA
TCGA-AC-A8OQ-01A	2.76678	Tumor	BRCA
TCGA-C8-A12N-01A	2.1758	Tumor	BRCA
TCGA-AO-A03U-01B	1.43127	Tumor	BRCA
TCGA-C8-A12T-01A	2.10965	Tumor	BRCA
TCGA-AO-A0J2-01A	3.76588	Tumor	BRCA
TCGA-D8-A27R-01A	2.26006	Tumor	BRCA
TCGA-A2-A0EU-01A	3.15862	Tumor	BRCA
TCGA-AO-A12D-01A	2.07686	Tumor	BRCA
TCGA-D8-A1XT-01A	2.21494	Tumor	BRCA
TCGA-A2-A0CW-01A	3.53649	Tumor	BRCA
TCGA-E2-A10F-01A	2.57469	Tumor	BRCA
TCGA-BH-A0E7-01A	1.81639	Tumor	BRCA
TCGA-D8-A1XG-01A	1.43516	Tumor	BRCA
TCGA-BH-A0AY-11A	1.02015	Normal	BRCA
TCGA-E9-A1N8-01A	2.78169	Tumor	BRCA
TCGA-E2-A2P5-01A	3.82368	Tumor	BRCA
TCGA-BH-A18P-11A	0.288492	Normal	BRCA
TCGA-C8-A278-01A	3.31827	Tumor	BRCA
TCGA-A8-A08R-01A	4.17269	Tumor	BRCA
TCGA-E2-A15A-01A	2.4177	Tumor	BRCA
TCGA-BH-A1FE-11B	1.78771	Normal	BRCA
TCGA-BH-A1EO-11A	0.919838	Normal	BRCA
TCGA-D8-A1JT-01A	4.01345	Tumor	BRCA
TCGA-D8-A142-01A	2.95213	Tumor	BRCA
TCGA-A2-A3Y0-01A	3.5822	Tumor	BRCA
TCGA-AQ-A0Y5-01A	2.0506	Tumor	BRCA
TCGA-A8-A07W-01A	2.47506	Tumor	BRCA
TCGA-A1-A0SM-01A	2.21646	Tumor	BRCA
TCGA-AC-A3EH-01A	2.01447	Tumor	BRCA
TCGA-MS-A51U-01A	1.7631	Tumor	BRCA
TCGA-AR-A24K-01A	2.84389	Tumor	BRCA
TCGA-AC-A2BM-01A	2.09226	Tumor	BRCA
TCGA-A2-A3XY-01A	2.4028	Tumor	BRCA
TCGA-E2-A14W-01A	2.28207	Tumor	BRCA
TCGA-BH-A1F8-01A	3.4137	Tumor	BRCA
TCGA-E9-A1RA-01A	2.40069	Tumor	BRCA
TCGA-A8-A0A6-01A	1.4405	Tumor	BRCA
TCGA-AC-A7VC-01A	3.34308	Tumor	BRCA
TCGA-C8-A27B-01A	3.56169	Tumor	BRCA
TCGA-S3-AA15-01A	2.8068	Tumor	BRCA
TCGA-BH-A1ES-01A	2.1105	Tumor	BRCA
TCGA-E2-A1L6-01A	1.97873	Tumor	BRCA
TCGA-BH-A0DT-11A	1.37199	Normal	BRCA
TCGA-E9-A1R0-01A	2.87287	Tumor	BRCA
TCGA-BH-A0B6-01A	1.46506	Tumor	BRCA
TCGA-B6-A0RN-01A	2.4481	Tumor	BRCA
TCGA-A8-A09W-01A	3.37835	Tumor	BRCA
TCGA-EW-A1P3-01A	2.8228	Tumor	BRCA
TCGA-A7-A13F-11A	0.920684	Normal	BRCA
TCGA-A2-A0T6-01A	1.36321	Tumor	BRCA
TCGA-A7-A5ZW-01A	1.79675	Tumor	BRCA
TCGA-BH-A203-01A	2.52114	Tumor	BRCA
TCGA-DS-A7WI-01A	4.35119	Tumor	CESC
TCGA-EX-A449-01A	4.50354	Tumor	CESC
TCGA-VS-A958-01A	4.13172	Tumor	CESC
TCGA-MY-A5BE-01A	4.72704	Tumor	CESC
TCGA-C5-A905-01A	5.02994	Tumor	CESC
TCGA-Q1-A73Q-01A	4.61281	Tumor	CESC
TCGA-BI-A0VR-01A	4.19835	Tumor	CESC
TCGA-EK-A2PK-01A	3.41775	Tumor	CESC
TCGA-FU-A3WB-01A	5.87687	Tumor	CESC
TCGA-MA-AA41-01A	4.25937	Tumor	CESC
TCGA-IR-A3LK-01A	4.4284	Tumor	CESC
TCGA-VS-A952-01A	5.50827	Tumor	CESC
TCGA-C5-A8YT-01A	3.35909	Tumor	CESC
TCGA-EA-A5ZD-01A	4.35505	Tumor	CESC
TCGA-C5-A1MI-01A	4.77671	Tumor	CESC
TCGA-EK-A2RO-01A	4.64622	Tumor	CESC
TCGA-FU-A3YQ-01A	5.14172	Tumor	CESC
TCGA-C5-A7CL-01A	4.11056	Tumor	CESC
TCGA-VS-A9UB-01A	4.53605	Tumor	CESC
TCGA-C5-A1BM-01A	2.83223	Tumor	CESC
TCGA-C5-A2LY-01A	5.29573	Tumor	CESC
TCGA-EA-A50E-01A	3.72673	Tumor	CESC
TCGA-ZJ-AAXU-01A	4.33209	Tumor	CESC
TCGA-HM-A6W2-01A	2.45909	Tumor	CESC
TCGA-C5-A1MQ-01A	4.66363	Tumor	CESC
TCGA-C5-A1BE-01B	3.61412	Tumor	CESC
TCGA-C5-A1MN-01A	4.08162	Tumor	CESC
TCGA-VS-A9U7-01A	4.95067	Tumor	CESC
TCGA-ZJ-AB0I-01A	4.82243	Tumor	CESC
TCGA-LP-A4AX-01A	3.90258	Tumor	CESC
TCGA-JW-A5VH-01A	3.30616	Tumor	CESC
TCGA-C5-A902-01A	4.24714	Tumor	CESC
TCGA-FU-A23L-01A	4.89891	Tumor	CESC
TCGA-FU-A3NI-01A	5.04897	Tumor	CESC
TCGA-VS-A9UT-01A	2.43376	Tumor	CESC
TCGA-C5-A8YR-01A	4.31209	Tumor	CESC
TCGA-VS-A94X-01A	2.99271	Tumor	CESC
TCGA-VS-A8EK-01A	4.07875	Tumor	CESC
TCGA-FU-A3HZ-01A	2.71009	Tumor	CESC
TCGA-ZJ-AAXT-01A	2.24951	Tumor	CESC
TCGA-C5-A2LT-01A	3.20299	Tumor	CESC
TCGA-WL-A834-01A	2.35669	Tumor	CESC
TCGA-FU-A40J-01A	5.20044	Tumor	CESC
TCGA-MU-A5YI-01A	4.67579	Tumor	CESC
TCGA-MA-AA3W-01A	4.45914	Tumor	CESC
TCGA-EK-A2PG-01A	3.53311	Tumor	CESC
TCGA-UC-A7PG-06A	4.22549	Tumor	CESC
TCGA-EA-A5ZE-01A	4.6748	Tumor	CESC
TCGA-4J-AA1J-01A	3.74501	Tumor	CESC
TCGA-C5-A7CH-01A	4.31921	Tumor	CESC
TCGA-C5-A8XH-01A	4.44871	Tumor	CESC
TCGA-JW-A69B-01A	3.98135	Tumor	CESC
TCGA-ZX-AA5X-01A	3.43467	Tumor	CESC
TCGA-VS-A9V0-01A	3.92156	Tumor	CESC
TCGA-EA-A97N-01A	5.0775	Tumor	CESC
TCGA-Q1-A73S-01A	4.28189	Tumor	CESC
TCGA-ZJ-AAXA-01A	5.1794	Tumor	CESC
TCGA-DS-A0VL-01A	4.77287	Tumor	CESC
TCGA-C5-A1BN-01B	3.83623	Tumor	CESC
TCGA-EK-A2IR-01A	4.57978	Tumor	CESC
TCGA-C5-A2M1-01A	4.20712	Tumor	CESC
TCGA-C5-A7CJ-01A	3.99052	Tumor	CESC
TCGA-EA-A1QT-01A	5.73038	Tumor	CESC
TCGA-VS-A957-01A	4.5579	Tumor	CESC
TCGA-JW-A5VK-01A	5.23861	Tumor	CESC
TCGA-EK-A2R7-01A	4.92825	Tumor	CESC
TCGA-EA-A4BA-01A	3.87802	Tumor	CESC
TCGA-EA-A411-01A	4.53934	Tumor	CESC
TCGA-HM-A6W2-06A	3.25094	Tumor	CESC
TCGA-C5-A7UE-01A	4.32324	Tumor	CESC
TCGA-JW-A5VI-01A	4.44918	Tumor	CESC
TCGA-VS-A9UD-01A	4.41072	Tumor	CESC
TCGA-DS-A0VN-01A	3.40825	Tumor	CESC
TCGA-HM-A3JK-01A	4.99499	Tumor	CESC
TCGA-LP-A5U3-01A	5.05164	Tumor	CESC
TCGA-DG-A2KH-01A	7.04284	Tumor	CESC
TCGA-C5-A2LS-01A	5.74045	Tumor	CESC
TCGA-IR-A3LH-01A	4.22421	Tumor	CESC
TCGA-Q1-A5R3-01A	4.85495	Tumor	CESC
TCGA-MA-AA3X-01A	4.86734	Tumor	CESC
TCGA-VS-A954-01A	3.0378	Tumor	CESC
TCGA-EA-A3HS-01A	4.5491	Tumor	CESC
TCGA-EA-A3HR-01A	4.36548	Tumor	CESC
TCGA-ZJ-AB0H-01A	3.98263	Tumor	CESC
TCGA-JX-A3Q0-01A	4.86252	Tumor	CESC
TCGA-DS-A3LQ-01A	4.86334	Tumor	CESC
TCGA-EK-A2R8-01A	4.36623	Tumor	CESC
TCGA-FU-A3TX-01A	4.49232	Tumor	CESC
TCGA-EA-A556-01A	4.10437	Tumor	CESC
TCGA-VS-A9UO-01A	4.61989	Tumor	CESC
TCGA-EX-A3L1-01A	3.86573	Tumor	CESC
TCGA-C5-A7CM-01A	3.6583	Tumor	CESC
TCGA-ZJ-AAXF-01A	4.59708	Tumor	CESC
TCGA-2W-A8YY-01A	2.87232	Tumor	CESC
TCGA-VS-A9UR-01A	4.06562	Tumor	CESC
TCGA-C5-A7X3-01A	4.01885	Tumor	CESC
TCGA-HM-A4S6-01A	4.1651	Tumor	CESC
TCGA-FU-A770-01A	4.44709	Tumor	CESC
TCGA-VS-A9UC-01A	3.91256	Tumor	CESC
TCGA-DS-A1OC-01A	3.90324	Tumor	CESC
TCGA-EX-A69M-01A	4.30209	Tumor	CESC
TCGA-C5-A1MK-01A	3.6192	Tumor	CESC
TCGA-JW-A5VJ-01A	3.25645	Tumor	CESC
TCGA-EX-A1H6-01B	4.61986	Tumor	CESC
TCGA-EA-A3Y4-01A	3.73271	Tumor	CESC
TCGA-JW-A5VL-01A	5.58265	Tumor	CESC
TCGA-EA-A1QS-01A	3.11941	Tumor	CESC
TCGA-EK-A2PM-01A	3.2445	Tumor	CESC
TCGA-JX-A3PZ-01A	4.15118	Tumor	CESC
TCGA-DG-A2KK-01A	4.97414	Tumor	CESC
TCGA-VS-A8QM-01A	3.69934	Tumor	CESC
TCGA-C5-A7CO-01A	4.22303	Tumor	CESC
TCGA-VS-A9UH-01A	3.59054	Tumor	CESC
TCGA-EA-A439-01A	4.26707	Tumor	CESC
TCGA-EK-A3GJ-01A	4.97596	Tumor	CESC
TCGA-EA-A3HQ-01A	5.04077	Tumor	CESC
TCGA-EA-A6QX-01A	4.95417	Tumor	CESC
TCGA-C5-A7UI-01A	4.54809	Tumor	CESC
TCGA-ZJ-AAXD-01A	5.60648	Tumor	CESC
TCGA-LP-A4AV-01A	3.42532	Tumor	CESC
TCGA-VS-A950-01A	4.87457	Tumor	CESC
TCGA-C5-A3HD-01B	4.60116	Tumor	CESC
TCGA-DS-A5RQ-01A	4.641	Tumor	CESC
TCGA-VS-A9UP-01A	5.25679	Tumor	CESC
TCGA-C5-A7CG-01A	4.55512	Tumor	CESC
TCGA-MY-A5BD-01A	6.06886	Tumor	CESC
TCGA-C5-A1M6-01A	7.65907	Tumor	CESC
TCGA-VS-A8QF-01A	4.20227	Tumor	CESC
TCGA-EK-A2RE-01A	3.56208	Tumor	CESC
TCGA-UC-A7PG-01A	3.22715	Tumor	CESC
TCGA-VS-AA62-01A	3.90288	Tumor	CESC
TCGA-C5-A2M2-01A	5.00546	Tumor	CESC
TCGA-MA-AA3Y-01A	2.55053	Tumor	CESC
TCGA-MY-A913-01A	4.69854	Tumor	CESC
TCGA-C5-A7CK-01A	3.77048	Tumor	CESC
TCGA-UC-A7PI-01A	4.57805	Tumor	CESC
TCGA-C5-A7X5-01A	3.36457	Tumor	CESC
TCGA-DG-A2KJ-01A	5.36059	Tumor	CESC
TCGA-VS-A9V3-01A	3.54099	Tumor	CESC
TCGA-DS-A7WF-01A	4.76695	Tumor	CESC
TCGA-C5-A8XK-01A	4.40848	Tumor	CESC
TCGA-EA-A5FO-01A	4.48782	Tumor	CESC
TCGA-VS-A9UZ-01A	4.09222	Tumor	CESC
TCGA-EK-A2IP-01A	4.73926	Tumor	CESC
TCGA-VS-A94W-01A	4.34797	Tumor	CESC
TCGA-DS-A1OB-01A	3.42786	Tumor	CESC
TCGA-EA-A410-01A	3.24651	Tumor	CESC
TCGA-EX-A8YF-01A	4.00475	Tumor	CESC
TCGA-EK-A2H0-01A	4.44458	Tumor	CESC
TCGA-VS-A9UV-01A	3.16226	Tumor	CESC
TCGA-LP-A7HU-01A	3.06506	Tumor	CESC
TCGA-VS-A8EI-01A	3.86218	Tumor	CESC
TCGA-BI-A0VS-01A	4.1778	Tumor	CESC
TCGA-DS-A0VM-01A	5.17649	Tumor	CESC
TCGA-IR-A3LB-01A	2.0804	Tumor	CESC
TCGA-VS-A8EC-01A	4.93531	Tumor	CESC
TCGA-VS-A9V2-01A	3.7678	Tumor	CESC
TCGA-EK-A3GN-01A	4.45858	Tumor	CESC
TCGA-IR-A3LA-01A	3.66928	Tumor	CESC
TCGA-C5-A7X8-01A	4.45118	Tumor	CESC
TCGA-EK-A2RL-01A	6.31728	Tumor	CESC
TCGA-C5-A0TN-01A	4.67697	Tumor	CESC
TCGA-FU-A57G-01A	2.45912	Tumor	CESC
TCGA-EK-A2PI-01A	5.82606	Tumor	CESC
TCGA-Q1-A73P-01A	4.31825	Tumor	CESC
TCGA-C5-A1MP-01A	4.61662	Tumor	CESC
TCGA-VS-A8EL-01A	3.94518	Tumor	CESC
TCGA-C5-A1BQ-01C	4.09451	Tumor	CESC
TCGA-ZJ-AAXI-01A	4.21783	Tumor	CESC
TCGA-FU-A23K-01A	3.96437	Tumor	CESC
TCGA-Q1-A6DT-01A	4.5	Tumor	CESC
TCGA-EK-A2H1-01A	4.65422	Tumor	CESC
TCGA-C5-A1M5-01A	5.14419	Tumor	CESC
TCGA-EA-A44S-01A	4.90081	Tumor	CESC
TCGA-EA-A78R-01A	3.80284	Tumor	CESC
TCGA-C5-A7XC-01A	3.18078	Tumor	CESC
TCGA-VS-A9V4-01A	3.45953	Tumor	CESC
TCGA-EK-A2RA-01A	4.85476	Tumor	CESC
TCGA-EX-A1H5-01A	5.7141	Tumor	CESC
TCGA-VS-A953-01A	2.89042	Tumor	CESC
TCGA-MA-AA3Z-01A	4.363	Tumor	CESC
TCGA-VS-A959-01A	3.30881	Tumor	CESC
TCGA-FU-A3EO-01A	4.68535	Tumor	CESC
TCGA-BI-A20A-01A	4.90511	Tumor	CESC
TCGA-DS-A1OD-01A	5.99737	Tumor	CESC
TCGA-C5-A1M9-01A	4.53032	Tumor	CESC
TCGA-MY-A5BF-11A	1.34921	Normal	CESC
TCGA-Q1-A6DW-01A	3.14559	Tumor	CESC
TCGA-C5-A3HF-01A	3.75917	Tumor	CESC
TCGA-VS-A8Q9-01A	4.65424	Tumor	CESC
TCGA-Q1-A5R2-01A	5.20591	Tumor	CESC
TCGA-VS-A8Q8-01A	4.69179	Tumor	CESC
TCGA-C5-A1BJ-01A	4.29786	Tumor	CESC
TCGA-Q1-A6DV-01A	4.12144	Tumor	CESC
TCGA-EK-A3GK-01A	4.11097	Tumor	CESC
TCGA-IR-A3LF-01A	4.25434	Tumor	CESC
TCGA-C5-A1M7-01A	4.12562	Tumor	CESC
TCGA-EK-A2PL-01A	4.36519	Tumor	CESC
TCGA-LP-A4AU-01A	2.2963	Tumor	CESC
TCGA-ZJ-AAXJ-01A	5.47531	Tumor	CESC
TCGA-VS-A94Z-01A	4.66509	Tumor	CESC
TCGA-EK-A2GZ-01A	4.2543	Tumor	CESC
TCGA-JW-A852-01A	4.08505	Tumor	CESC
TCGA-VS-A9V5-01A	4.19455	Tumor	CESC
TCGA-ZJ-AAXB-01A	3.48863	Tumor	CESC
TCGA-EK-A2R9-01A	4.85294	Tumor	CESC
TCGA-C5-A3HE-01A	2.91041	Tumor	CESC
TCGA-ZJ-A8QR-01A	3.81198	Tumor	CESC
TCGA-EK-A2RC-01A	5.89098	Tumor	CESC
TCGA-C5-A1ML-01A	3.78446	Tumor	CESC
TCGA-FU-A5XV-01A	3.93278	Tumor	CESC
TCGA-EA-A43B-01A	4.17496	Tumor	CESC
TCGA-MA-AA42-01A	3.22182	Tumor	CESC
TCGA-VS-A9UJ-01A	2.66936	Tumor	CESC
TCGA-VS-A9V1-01A	4.21174	Tumor	CESC
TCGA-JW-AAVH-01A	4.64834	Tumor	CESC
TCGA-VS-A8EJ-01A	4.22471	Tumor	CESC
TCGA-Q1-A73O-01A	3.55579	Tumor	CESC
TCGA-FU-A2QG-01A	4.34195	Tumor	CESC
TCGA-DS-A1O9-01A	4.38285	Tumor	CESC
TCGA-VS-A8QA-01A	6.31419	Tumor	CESC
TCGA-C5-A1MH-01A	4.6687	Tumor	CESC
TCGA-XS-A8TJ-01A	4.77056	Tumor	CESC
TCGA-C5-A1ME-01A	4.30738	Tumor	CESC
TCGA-C5-A2LZ-01A	4.7881	Tumor	CESC
TCGA-HM-A3JJ-11A	1.36005	Normal	CESC
TCGA-GH-A9DA-01A	3.924	Tumor	CESC
TCGA-VS-A8QH-01A	3.3827	Tumor	CESC
TCGA-VS-A9U6-01A	4.59495	Tumor	CESC
TCGA-C5-A8YQ-01A	3.1489	Tumor	CESC
TCGA-DS-A1OA-01A	4.02316	Tumor	CESC
TCGA-HG-A2PA-01A	4.25935	Tumor	CESC
TCGA-EA-A3QD-01A	4.80018	Tumor	CESC
TCGA-C5-A7UC-01A	3.18901	Tumor	CESC
TCGA-MA-AA43-01A	3.15305	Tumor	CESC
TCGA-Q1-A73R-01A	4.06387	Tumor	CESC
TCGA-PN-A8MA-01A	5.66172	Tumor	CESC
TCGA-C5-A2LV-01A	4.72497	Tumor	CESC
TCGA-VS-A9UQ-01A	4.44997	Tumor	CESC
TCGA-MY-A5BF-01A	4.77087	Tumor	CESC
TCGA-JX-A3Q8-01A	4.89317	Tumor	CESC
TCGA-VS-A9UM-01A	3.85883	Tumor	CESC
TCGA-VS-A8EH-01A	3.84012	Tumor	CESC
TCGA-LP-A4AW-01A	3.0288	Tumor	CESC
TCGA-C5-A1MJ-01A	5.80853	Tumor	CESC
TCGA-UC-A7PD-01A	3.99866	Tumor	CESC
TCGA-EK-A2RK-01A	4.53439	Tumor	CESC
TCGA-Q1-A5R1-01A	4.4445	Tumor	CESC
TCGA-VS-A9U5-01A	6.07746	Tumor	CESC
TCGA-EA-A3QE-01A	3.79623	Tumor	CESC
TCGA-EK-A3GM-01A	3.8648	Tumor	CESC
TCGA-EA-A3HT-01A	3.90448	Tumor	CESC
TCGA-IR-A3L7-01A	5.09484	Tumor	CESC
TCGA-C5-A2LX-01A	5.7973	Tumor	CESC
TCGA-MU-A51Y-01A	4.43978	Tumor	CESC
TCGA-JX-A5QV-01A	5.55707	Tumor	CESC
TCGA-FU-A3HY-01A	4.51967	Tumor	CESC
TCGA-MU-A8JM-01A	4.75235	Tumor	CESC
TCGA-RA-A741-01A	4.16134	Tumor	CESC
TCGA-C5-A1BF-01B	3.48926	Tumor	CESC
TCGA-C5-A3HL-01A	4.42205	Tumor	CESC
TCGA-EK-A2RN-01A	3.65671	Tumor	CESC
TCGA-C5-A901-01A	3.32696	Tumor	CESC
TCGA-VS-A9UI-01A	4.86864	Tumor	CESC
TCGA-VS-A9UY-01A	4.24251	Tumor	CESC
TCGA-C5-A1MF-01A	4.52465	Tumor	CESC
TCGA-VS-A9UL-01A	4.61125	Tumor	CESC
TCGA-ZJ-AAXN-01A	4.07047	Tumor	CESC
TCGA-ZJ-A8QQ-01A	4.33457	Tumor	CESC
TCGA-C5-A8XI-01A	4.61756	Tumor	CESC
TCGA-C5-A8XJ-01A	3.30481	Tumor	CESC
TCGA-EA-A5ZF-01A	5.16023	Tumor	CESC
[truncated: 9,059 more rows]
