# Supplementary material for: RecQ mediated genome instability 2 (RMI2): a potential prognostic and immunological biomarker for pan-cancers
Source: Aging (Albany NY). 2022 May 12;14(9):4107–36. doi: 10.18632/aging.204076 (PMC9134953; doi:10.18632/aging.204076)
Supplement: Supplementary Table 6 [file aging-14-204076-s004.xls]

## Sheet: Table 6
Supplementary Table 6. Results of correlation analysis of RMI2 expression with specific immune cell infiltration in various types of cancer.
CancerType	Gene	B cells naive	B cells memory	Plasma cells	T cells CD8	T cells CD4 naive	T cells CD4 memory resting	T cells CD4 memory activated	T cells follicular helper	T cells regulatory (Tregs)	T cells gamma delta	NK cells resting	NK cells activated	Monocytes	Macrophages M0	Macrophages M1	Macrophages M2	Dendritic cells resting	Dendritic cells activated	Mast cells resting	Mast cells activated	Eosinophils	Neutrophils
ACC	RMI2	0.169322	0.852174	0.865452	0.0231472	1	0.269957	1	0.246523	0.99422	0.00903652	0.187453	0.163957	0.914435	0.0102731	0.58961	0.385006	0.0780163	0.398081	0.000401195	0.248446	0.00649785	0.985846
BLCA	RMI2	0.551115	0.063682	0.535104	0.0087003	1	7.22618e-05	0.0800584	0.0195526	0.0695836	0.956136	0.155244	0.132492	0.573644	0.0148376	0.0796977	0.174551	0.00462922	0.602304	0.0806998	0.213728	0.414117	0.214842
BRCA	RMI2	0.00098194	0.374231	0.546465	0.00734996	1	8.02669e-12	3.32506e-15	2.52519e-06	0.000383013	0.0588187	1	0.000775254	0.000182795	2.78656e-12	9.90569e-12	0.00120238	0.00375684	3.0616e-06	1.1049e-11	1	1	0.0295529
CESC	RMI2	0.0853561	0.0957008	0.686862	0.0501608	1	0.233383	0.142538	0.587671	0.203469	0.654654	0.072694	0.853572	0.743459	0.00056765	0.82212	0.508354	1.59317e-05	0.414232	0.00893767	0.00190443	1	0.000207538
CHOL	RMI2	0.576833	0.110896	0.376876	0.525015	1	0.973631	0.743384	0.217273	0.0355601	1	1	0.165511	0.0475619	0.213569	0.380704	0.547617	0.291259	0.366974	0.136638	0.23885	1	0.834081
COAD	RMI2	0.209954	0.380839	0.071116	0.00023768	1	0.00284568	0.00178834	0.00157049	0.750457	1	0.0426314	3.80228e-05	0.92621	0.405831	0.000675897	0.235769	0.623149	0.190117	0.00293514	1.26754e-05	0.152593	0.0574797
DLBC	RMI2	0.821688	0.129943	1	0.574104	1	0.9282	0.384006	0.0638658	0.534761	0.065933	1	0.512773	0.978383	0.877585	0.527763	0.714957	0.97847	0.264095	0.54936	1	1	1
ESCA	RMI2	0.64578	0.861203	0.873316	0.241328	1	0.274437	0.00624095	0.00924731	0.348862	1	0.184288	0.0352307	0.371122	0.568696	0.84269	0.896275	0.848142	0.169228	0.0504653	0.520861	1	0.0425236
GBM	RMI2	0.300047	0.826559	0.459314	0.961164	1	0.191174	0.879752	0.529092	1	0.112895	0.60814	0.16727	0.244065	0.530195	0.208735	0.00314816	0.974376	1	0.273689	0.403464	0.000806854	0.382473
HNSC	RMI2	0.0259017	0.560598	0.000482017	4.26735e-09	1	2.22917e-06	1.28551e-06	4.42966e-07	5.96951e-07	1	0.0802993	0.0818186	0.320003	0.00034536	0.692887	0.762978	4.25337e-07	0.0964455	0.687334	0.00698533	1	1.06017e-10
KICH	RMI2	0.723694	1	0.482493	0.265785	1	0.346444	1	0.229928	0.786745	0.759017	0.396386	0.271996	0.3934	0.985658	0.971919	0.191159	0.697269	0.199162	0.140996	1	0.655155	0.561062
KIRC	RMI2	0.199012	0.0905368	0.326716	0.00138281	1	0.000130429	0.0116179	0.00044596	0.00077109	0.00264915	4.7944e-07	0.000591341	0.00222123	0.987831	0.00963646	0.0251799	0.0445645	0.129234	0.0146909	1	1	0.181859
KIRP	RMI2	0.390634	0.731829	0.0540884	0.240475	1	0.811758	0.544553	0.0194887	0.182973	1	0.871215	0.0348107	0.138187	0.00138228	0.102231	4.321e-05	0.837954	0.000893451	1.17492e-07	1	1	0.0913579
LAML	RMI2	0.624953	0.0876979	0.0480502	0.0480775	0.761588	0.990347	0.285093	1	1	0.470523	0.0270809	0.936636	0.798042	1	1	0.0711274	1	1	0.994917	1	0.808735	0.858361
LGG	RMI2	0.698899	0.730511	1	0.00602035	1	5.12094e-05	1	0.000748146	1	1	0.836625	0.134603	6.04175e-06	1.10609e-06	1.0914e-09	0.384276	0.00164384	1	0.0625708	2.6211e-06	0.219792	0.190877
LIHC	RMI2	0.0063381	1	0.273255	0.30511	1	0.0751405	3.89784e-05	2.62948e-06	0.112904	0.984003	8.95682e-05	0.77311	0.106658	0.292134	0.180365	3.08568e-06	0.0105384	0.310234	0.134351	1	1	0.837936
LUAD	RMI2	0.565336	0.947986	0.199034	8.0643e-05	1	5.64673e-08	2.60344e-11	0.000454496	0.845451	0.105517	1	0.0583196	0.035615	7.49848e-06	1.30537e-20	0.0109281	2.28154e-08	0.101239	5.63813e-11	1	0.95415	0.00402159
LUSC	RMI2	5.16883e-05	0.0284971	0.961266	0.00213883	1	7.07298e-07	0.184658	0.00128367	0.732469	1	0.157718	0.00418252	0.00156037	0.624716	0.000776894	0.0591696	0.202804	0.261628	0.752081	0.00804527	0.286685	4.70849e-08
MESO	RMI2	0.0166675	0.664619	0.0899571	0.160028	1	0.91889	0.929252	0.395791	0.0194528	1	1	0.351368	0.96921	0.632442	0.0593997	0.114895	0.0978446	0.383443	0.534496	1	1	0.0384523
OV	RMI2	0.376201	0.648173	0.689035	0.0408198	1	0.000444519	0.000198741	0.000167223	0.726572	0.575865	1	0.879475	0.112279	0.0262603	0.0204204	0.116978	0.147788	0.514198	0.777035	0.168118	1	0.650284
PAAD	RMI2	0.176313	0.0091153	0.32001	0.0670525	1	0.939255	0.576536	0.0268541	0.629843	1	0.207669	0.155127	0.00475055	0.0129631	0.0107154	0.691527	0.239976	0.0788545	0.00826636	1	1	0.746684
PCPG	RMI2	0.952748	0.429462	0.12845	0.96302	1	0.0872003	0.41419	0.408275	0.726482	1	0.241766	0.349792	0.618574	0.23292	0.637419	0.138331	0.467693	0.42224	0.104497	0.0408522	0.472925	0.614403
PRAD	RMI2	0.262738	0.0336663	0.322598	0.227145	1	0.0799484	0.214225	0.738516	1.92756e-06	1	1	0.747802	0.324235	0.191751	0.146696	0.139538	0.189006	0.0990309	0.000228502	1	1	1
READ	RMI2	0.423627	0.967222	0.0826635	0.775499	1	0.0297917	0.0663566	0.0772252	0.70451	1	0.113566	0.339276	0.302705	0.676194	0.819143	0.00215385	0.149606	0.404313	0.888601	0.049516	0.0249561	0.00166457
SARC	RMI2	0.105266	1	0.0837714	0.434098	1	0.715352	0.506549	0.131022	0.00216859	0.667524	1	0.428595	0.493127	0.609979	0.0823897	0.66399	0.287908	0.746422	0.584859	0.450236	1	1
SKCM	RMI2	0.333722	0.306321	0.261125	0.00155975	1	0.00646504	2.3815e-05	0.027458	0.676127	0.125927	0.843592	0.0232416	0.997868	0.613607	0.445877	0.000334039	0.198777	0.366401	0.0979469	0.00415757	1	0.202538
STAD	RMI2	0.098083	0.447021	0.00586466	0.00682262	1	0.000133691	1.29878e-12	1.23386e-08	0.87557	1	0.794177	0.0104355	0.00089373	0.0385751	0.00010318	0.239416	0.703711	0.241144	2.75344e-05	0.150158	0.0110883	0.553613
TGCT	RMI2	0.746757	0.998555	0.786424	0.774602	1	0.237353	0.319839	0.501127	0.00845457	1	1	0.9284	0.806543	0.0607426	0.122849	0.518422	0.276651	0.808661	0.872628	1	1	1
THCA	RMI2	0.0659898	0.0165349	0.000556746	0.42511	1	0.00746876	0.379585	0.0212716	0.150958	0.0282579	0.0220325	0.0222962	0.317578	0.231967	0.674411	0.656793	0.219389	0.986584	0.118229	1	1	1
THYM	RMI2	0.29654	0.0139662	0.313524	0.15803	0.000133928	0.867791	0.0910342	0.0275281	0.0225686	0.00653983	5.06993e-05	7.89102e-07	0.00364171	0.000320184	9.79604e-08	2.21377e-06	3.5109e-06	0.167492	3.39759e-11	1	1	1
UCEC	RMI2	0.58385	0.00964125	0.271843	0.230037	1	0.00295264	0.00014466	0.000271243	2.26977e-07	0.189069	0.071254	0.1784	0.938592	0.0787233	8.7755e-06	0.259468	0.00674975	0.0358863	0.0288452	0.163323	1	0.00282068
UCS	RMI2	0.0723856	0.154361	0.0254838	0.224004	1	0.504745	0.479067	0.206434	0.0762482	0.852571	0.437504	0.851379	0.0348543	0.858047	0.300101	0.10946	0.356678	0.973528	0.465398	0.805504	1	0.166583
UVM	RMI2	0.996242	1	0.87923	0.421712	1	0.552646	0.447175	0.208082	0.534895	0.246292	0.92227	0.823645	0.837945	0.655471	0.948794	0.137601	0.728283	1	0.083528	1	1	1
