# Supplementary material for: RecQ mediated genome instability 2 (RMI2): a potential prognostic and immunological biomarker for pan-cancers
Source: Aging (Albany NY). 2022 May 12;14(9):4107–36. doi: 10.18632/aging.204076 (PMC9134953; doi:10.18632/aging.204076)
Supplement: Supplementary Table 7 [file aging-14-204076-s005.xls]

## Sheet: Table 7
Supplementary Table 7. Results of correlation analysis and P values for the association between RMI2 and immune checkpoint- -related genes.
CancerType	BTLA	CD200	TNFRSF14	NRP1	LAIR1	TNFSF4	CD244	LAG3	ICOS	CD40LG	CTLA4	CD48	CD28	CD200R1	HAVCR2	ADORA2A	CD276	KIR3DL1	CD80	PDCD1	LGALS9	CD160	TNFSF14	IDO2	ICOSLG	TMIGD2	VTCN1	IDO1	PDCD1LG2	HHLA2	TNFSF18	BTNL2	CD70	TNFSF9	TNFRSF8	CD27	TNFRSF25	VSIR	TNFRSF4	CD40	TNFRSF18	TNFSF15	TIGIT	CD274	CD86	CD44	TNFRSF9
ACC	0.254279	0.498772	0.0877905	0.0819017	0.00271244	0.138943	0.0613431	0.527852	0.563811	0.00125383	0.223503	0.00301727	0.115547	0.00146815	0.058675	0.10176	0.0017337	0.120805	0.885729	0.441689	0.0605848	0.90509	0.00874116	0.251333	0.454675	0.0819831	0.178266	0.698638	0.107286	0.0881523	0.158525	0.952372	0.467734	0.723973	0.527023	0.0257408	0.88104	0.0128893	0.872754	0.247871	0.401523	0.731473	0.371959	0.390459	0.0260372	0.0548141	0.195278
BLCA	0.841522	0.0882207	0.0830407	0.0527948	0.419696	0.217892	0.927193	0.0255941	0.850594	0.153074	0.526242	0.927275	0.0796269	0.0119474	0.603479	0.596286	0.829604	0.869019	0.870043	0.200816	0.0961014	0.368624	0.228968	0.763874	0.0212422	0.0726227	1.669e-05	0.350466	0.763909	0.0830309	0.0385308	0.347327	0.596644	0.169967	0.984925	0.76538	0.87796	0.090207	0.990427	0.00910036	0.019803	0.0920243	0.290832	0.0920426	0.776894	0.000771237	0.648297
BRCA	0.238121	5.30006e-12	6.69263e-07	5.16135e-26	0.656223	0.04737	0.527323	4.70368e-23	3.47689e-07	0.429768	2.02854e-07	0.265518	0.0556903	0.000579342	0.910409	0.0416673	0.349753	0.0745411	0.000133851	5.46263e-06	3.11214e-08	2.53905e-07	0.434905	0.236389	0.0465555	0.0639374	0.00059578	2.4978e-12	0.299354	0.471307	0.188406	0.255873	0.000135967	0.00710965	0.41762	0.0502852	0.0558212	1.9105e-07	0.0221891	0.955252	0.0171562	0.0379539	1.75415e-05	0.00365822	0.157213	8.25582e-11	0.000948302
CESC	0.602462	0.101023	0.0526218	0.000215972	0.28481	0.0849942	0.102695	0.876171	0.560763	0.251044	0.86684	0.744409	0.623701	0.548448	0.515476	0.138894	0.135589	0.16724	0.32121	0.662108	7.1504e-06	0.335779	0.160663	0.807208	0.555521	0.586389	0.00137264	0.255058	0.0467629	0.533352	0.845604	0.712139	0.834529	0.1124	0.197969	0.657717	0.274165	0.3843	0.458249	0.331972	0.0360001	0.0923962	0.760067	0.356643	0.83705	0.0532565	0.487116
CHOL	0.882966	0.781887	0.5244	0.594849	0.700225	0.95302	0.829127	0.0842229	0.546252	0.865891	0.582238	0.855938	0.699306	0.799438	0.472511	0.483853	0.44183	0.385397	0.478664	0.815789	0.448405	0.948059	0.5199	0.89659	0.673177	0.866939	0.519026	0.609597	0.648833	0.265669	0.85687	0.856856	0.272097	0.111505	0.907853	0.680005	0.235509	0.284752	0.90614	0.953702	0.955012	0.697196	0.566085	0.478771	0.584694	0.754842	0.782261
COAD	0.789302	0.00936331	0.255487	0.00332002	0.138196	0.0303318	0.251684	0.00106597	0.77209	0.143767	0.5216	0.78636	0.0419991	0.13528	0.87933	0.050252	7.58845e-05	0.869557	0.242135	0.040673	0.0215737	0.0265187	0.000745688	0.203252	0.817379	0.383774	0.485791	0.00064856	0.180703	0.0285695	0.121776	0.585078	0.71831	0.328183	0.892258	0.706501	0.559794	0.0205663	0.611049	0.0139477	0.0207268	0.00367234	0.614505	0.931302	0.57363	0.0495854	0.848631
DLBC	0.10601	0.50621	0.295672	0.636278	0.307998	0.312704	0.178443	0.35669	0.722336	0.340971	0.775321	0.23006	0.278871	0.759621	0.378481	0.0528404	0.651021	0.894285	0.752882	0.261872	0.0348351	0.414838	0.28174	0.339168	0.227002	0.785158	0.996674	0.132365	0.850595	0.384768	0.530834	0.570528	0.746909	0.281926	0.468983	0.637355	0.317796	0.246911	0.969969	0.0728881	0.887339	0.995748	0.0822035	0.626032	0.0390248	0.496833	0.564013
ESCA	0.588328	0.857706	0.0310345	0.321425	0.301231	0.700005	0.0659596	0.25973	0.619878	0.0131332	0.799688	0.195609	0.0613837	0.85959	0.64633	0.458318	0.0269739	0.846567	0.217823	0.984512	0.373061	0.212373	0.276375	0.455481	0.66744	0.953669	0.763566	0.874816	0.985814	0.214275	0.0684039	0.046257	0.0943181	0.244763	0.619796	0.423612	0.0269242	0.162658	0.688201	0.00150709	0.00935461	0.232162	0.838041	0.0705962	0.722057	0.589706	0.833988
GBM	0.0620026	0.943956	0.0487649	0.556508	0.00125235	0.358692	0.0025291	0.000712463	0.584874	0.180736	0.797719	0.35318	0.127077	0.0694264	0.00102011	0.0664558	0.052563	0.142146	0.632311	0.689511	0.103522	0.839046	0.160143	0.0531028	0.184159	0.00284732	0.000955901	0.0504879	0.249036	0.331896	0.820157	0.00431329	0.963937	0.0743108	0.0239134	0.609705	0.906142	0.00117251	0.690018	0.0625085	0.894375	0.876354	0.884495	0.166016	0.00277967	0.0974522	0.352597
HNSC	1.35408e-07	1.65892e-08	5.2069e-16	6.55208e-10	0.108886	0.0169205	0.189507	6.6648e-09	0.0263929	3.5636e-07	5.07749e-06	1.72502e-06	0.0159461	0.00142585	0.00456299	4.59346e-19	5.14906e-06	0.000393214	0.967735	3.9628e-12	3.83946e-21	1.88202e-05	0.889389	8.59755e-10	1.24753e-12	3.56565e-10	4.76508e-05	1.73765e-07	0.000379025	0.00417509	0.0735654	0.000303505	4.76717e-06	0.0259973	0.0166655	1.04411e-08	2.1796e-06	0.203145	1.86176e-06	7.80389e-16	2.86511e-13	5.29811e-17	6.35574e-07	0.412384	0.641706	5.67106e-15	1.50886e-05
KICH	0.327672	0.00940812	0.629997	0.404658	0.436433	0.573622	0.101791	0.965485	0.723988	0.393124	0.84328	0.126242	0.850927	0.49424	0.325983	0.64297	0.338557	0.149157	0.12051	0.955695	0.176803	0.730394	0.465842	0.48734	0.977403	0.130474	0.36148	0.379351	0.959444	0.00372535	0.226482	0.959759	0.399278	0.520448	0.355944	0.227803	0.496436	0.117581	0.0100315	0.792434	0.14886	0.633024	0.640141	0.245377	0.180237	0.286231	0.423668
KIRC	8.73392e-07	3.60438e-09	5.39592e-06	5.24325e-11	0.0777708	4.96254e-08	0.00690944	1.69638e-11	1.59256e-06	0.983106	3.77275e-07	0.26531	0.0082203	9.51364e-05	0.148974	0.000212977	0.0359497	0.0744263	3.66822e-08	5.42017e-09	0.216009	0.861551	0.0742485	0.0598431	0.535967	0.00462562	2.73398e-05	0.0596359	0.000204207	8.66338e-07	0.0176849	0.950874	0.153943	0.801976	0.000995586	1.5596e-06	0.0161731	1.88623e-05	2.0425e-08	0.887286	0.0068083	0.00828744	3.17863e-09	0.000701503	0.0120109	7.97421e-13	7.24577e-11
KIRP	0.0178326	0.384737	2.07908e-18	0.425818	2.84058e-06	0.00145333	0.000963663	0.102218	0.728529	0.0510361	0.27787	0.000757617	0.100745	0.241861	5.32767e-09	0.00182636	1.84236e-08	0.01034	0.442191	0.231968	0.00215952	0.835227	0.529038	0.501922	0.487135	0.0747801	0.0111679	0.00420406	0.869572	0.0123503	0.243332	0.753699	0.617714	0.749463	0.947484	0.66488	0.651094	0.000934258	0.113982	0.831959	0.139785	0.741329	0.137689	0.893471	1.79323e-05	0.00860905	0.450758
LAML	0.432366	0.737453	5.31313e-07	0.153992	0.210844	0.00368176	0.165386	0.291433	8.55401e-05	0.0013964	7.22936e-05	0.000173599	1.25432e-05	0.405512	0.0248236	0.4427	0.87675	0.0173858	0.777933	0.171098	0.226495	0.0289612	0.18039	0.29705	0.710228	0.129909	0.636024	0.947425	0.0440029	0.453308	0.897527	0.45074	0.688007	0.131668	0.0349128	0.000331518	0.00544857	0.816672	0.0277489	0.000483327	0.0534051	0.767728	0.00302238	0.20669	0.593908	0.000650852	0.330034
LGG	0.0646263	0.41463	1.58377e-06	3.69795e-10	0.264106	0.0192305	0.241035	7.35947e-12	0.00209577	0.00179634	0.00370074	7.32937e-06	0.0513962	0.63956	0.215755	0.162344	1.65964e-28	0.334589	0.00013869	0.035596	0.436375	0.400111	0.0086912	0.234137	0.224576	0.512254	2.72479e-05	7.25924e-07	0.252445	1.48815e-08	2.72091e-05	0.622548	0.0121264	0.572718	0.185971	0.00179107	0.989446	8.08683e-15	1.84949e-13	0.145629	8.28996e-08	0.0991907	0.234483	0.750132	0.00542078	0.00228294	0.456163
LIHC	0.00990659	0.202029	9.35069e-05	0.104073	1.39024e-06	2.16913e-05	0.0129076	1.8936e-10	3.03789e-07	0.445919	4.17116e-10	0.00676362	0.000121666	0.00287279	2.13207e-05	0.00631767	9.87258e-13	0.454639	0.00233974	2.25327e-08	3.91276e-06	0.134722	0.66299	0.425091	0.270245	0.584337	0.0079829	0.000181618	0.0238407	0.0361274	0.0525077	0.636945	0.00445916	0.0039871	3.1451e-05	6.29636e-07	0.000254667	0.00118279	2.09666e-08	1.57736e-06	7.48478e-09	0.000429126	9.1761e-07	0.0012019	5.09977e-06	0.286333	0.0262364
LUAD	0.546848	0.788673	0.289376	0.00723548	0.834044	1.62149e-05	0.499023	2.2445e-16	0.0663449	1.20453e-05	0.00164805	0.541193	0.0512608	0.0367873	0.241504	0.64517	0.00506956	0.422886	0.920253	7.92391e-07	0.328694	0.942859	0.00212212	0.0171897	0.850537	0.148758	3.03567e-06	5.87002e-14	0.000915181	0.17221	0.464681	0.0092738	2.66574e-06	0.26354	0.0568217	0.832976	3.90789e-10	0.0800365	0.0273235	0.0172675	0.00016169	1.1828e-05	0.000362947	0.000222376	0.165439	0.000600197	7.38745e-06
LUSC	0.0154811	0.907848	0.0137448	2.95622e-13	9.97412e-09	0.0186289	0.0323657	0.127743	0.00191239	0.000654758	0.0592374	0.00304901	6.98579e-08	0.0695318	2.07262e-07	0.101038	0.0207555	0.148008	0.000186588	0.273551	0.124547	0.311385	1.52298e-06	0.3696	0.864842	0.0330622	0.0319236	0.397825	0.0696129	0.0282963	0.0481483	0.000211683	0.956556	0.268969	0.00092205	0.00485755	0.36476	7.62983e-12	0.00159345	0.922509	0.383896	0.542366	0.365166	0.910758	7.56866e-08	1.11528e-06	0.0264714
MESO	0.606917	0.00311546	0.961215	0.0424206	0.739168	0.0584298	0.960135	0.099324	0.178996	0.076639	0.199433	0.870761	0.242147	0.242144	0.925382	0.486438	0.00629018	0.380469	0.215439	0.0159094	0.16319	0.00446167	0.0216599	0.618543	0.832121	0.864914	0.453403	0.0261169	0.241733	0.0191625	0.0930612	0.542816	0.00571091	0.0804425	0.224255	0.194568	0.00196787	0.000934443	0.0126177	0.750362	0.0014497	0.79383	0.0956317	0.797027	0.607223	0.679377	0.057226
OV	0.475492	0.148616	0.00667964	0.536265	0.236495	0.0753478	0.906118	0.00936621	0.0284346	0.960571	0.0229694	0.637221	0.416426	0.313961	0.607691	0.117836	0.277327	0.990073	0.0399574	0.0280082	0.619893	0.0083714	0.0157134	0.345719	0.554874	0.826301	0.242242	0.514387	0.378036	0.789459	0.555251	0.51858	0.87377	0.015032	0.24475	0.703295	0.178355	0.00249599	0.10947	0.337874	0.85257	0.0945572	0.0588303	0.0914988	0.99521	0.615172	0.3597
PAAD	0.572401	1.44885e-07	3.35382e-05	0.0059494	0.485369	0.109833	0.87026	0.00579022	0.234073	0.729925	0.0505906	0.813738	0.675401	0.816362	0.207781	0.00464192	2.68981e-05	0.524477	0.0437467	0.0760321	2.6857e-12	0.0592413	0.942489	0.442404	0.444644	0.192231	0.408194	0.00509258	0.0898582	0.176568	0.0655065	0.524102	2.55405e-08	2.86568e-05	0.759294	0.146127	0.00969207	0.000215437	0.253944	0.000243802	1.51456e-05	0.000732467	0.292216	0.0609513	0.286133	0.000123981	0.00528161
PCPG	0.466128	0.00762985	0.936359	0.992091	0.96128	0.0908882	0.429778	0.913126	0.711754	0.149716	0.531961	0.392642	0.34151	0.103826	0.596772	0.979605	0.0412408	0.115693	0.657854	0.891567	0.949792	0.0478406	0.653482	0.872575	0.349109	0.121114	0.449156	0.50681	0.463469	0.424209	0.001434	0.647803	0.00101793	0.0587341	0.627109	0.520384	0.227833	0.585967	0.30087	0.192572	0.532632	0.0741179	0.758539	0.128428	0.45986	0.363339	0.333044
PRAD	1.19154e-14	0.230364	0.218701	0.000846314	2.44959e-08	0.161719	5.35442e-07	3.68041e-10	5.35986e-09	7.78343e-06	1.30678e-10	4.20558e-10	0.000139834	1.14789e-05	3.39034e-12	0.00244918	6.02931e-07	0.0377483	1.11716e-10	1.55798e-14	5.60009e-12	0.956265	0.000162419	0.93243	0.0801758	2.61596e-05	0.382764	3.67155e-08	0.000119565	0.000131448	2.12984e-05	0.102002	2.79104e-18	0.923665	3.42428e-11	4.2592e-15	1.19565e-06	0.252113	1.50842e-11	0.3178	2.12945e-14	0.0258473	3.26901e-14	0.0350458	1.4657e-10	7.83637e-06	5.26253e-14
READ	0.358888	0.467119	0.308959	0.00428102	0.000865346	0.0349113	0.113147	0.881468	0.464524	0.5684	0.0401701	0.0101805	0.0203062	0.0244931	0.0141849	0.00147865	0.0228545	0.664195	0.0355421	0.044419	0.0820157	0.0668926	0.000734079	0.271864	0.00317839	0.460579	0.023186	0.63781	0.0565691	4.3996e-05	0.0163251	0.537739	0.27295	0.333368	0.199627	0.212618	0.966975	8.81153e-05	0.00988878	0.332307	0.0971031	0.70763	0.305606	0.675829	0.0269881	0.00399528	0.125322
SARC	0.901751	0.682868	0.4046	0.136772	0.118203	0.389666	0.332407	0.0100745	0.285045	0.178291	0.140206	0.293472	0.154912	0.444908	0.158336	0.232445	0.697285	0.195277	0.460465	0.322427	0.556723	0.381667	0.746786	0.720003	0.619928	0.0719411	3.88713e-05	0.565442	0.11063	0.364972	0.246773	0.0866525	0.00587968	0.367021	0.118495	0.298385	0.456866	0.174858	0.145566	0.574506	0.709924	0.593555	0.276005	0.00481178	0.245806	0.508301	0.993569
SKCM	0.000248701	0.330969	0.274749	0.311408	0.0129279	0.00800425	0.000298572	3.37113e-06	2.58495e-05	0.0212358	0.000229752	0.000223092	0.00845813	0.0671378	0.000371846	0.000320433	0.0378669	0.0614322	0.000721863	9.86293e-06	0.0151901	0.164957	0.0630954	0.00592266	0.0397474	0.0074724	0.294458	6.38985e-05	0.00305514	0.106991	0.864697	0.317007	0.504149	0.772608	0.677838	0.000334836	0.486483	0.947942	0.253377	0.00989663	0.0791714	0.0137691	7.02003e-06	0.00432129	0.00174848	0.00234561	1.3904e-05
STAD	0.0500838	1.62566e-06	0.00156058	1.28478e-06	0.446954	0.416703	0.014354	2.40642e-06	0.073779	0.177097	0.0046502	0.167654	0.00666142	0.14902	0.308592	0.0284905	0.454977	0.0814626	0.0189092	0.000430517	7.94137e-05	0.734031	0.0270045	0.832792	0.823846	0.061958	0.968189	1.35937e-06	0.519388	0.274699	0.213096	0.324858	0.000400561	0.00325061	0.0341008	0.602914	0.000132781	6.52685e-05	0.000533112	0.0422443	2.78061e-07	0.343638	0.0739015	0.00625816	0.953674	0.0935697	0.153683
TGCT	0.56484	0.890667	0.0989512	0.0732738	0.267642	0.370669	0.594834	0.351827	0.706897	0.692619	0.657668	0.817497	0.413556	0.336859	0.226647	0.568029	0.650741	0.172166	0.569165	0.844709	0.322861	0.809096	0.136075	0.192271	0.5189	0.169699	0.313078	0.928342	0.164744	0.332965	0.340564	0.19736	0.635242	0.341383	0.0971073	0.851047	0.437304	0.0372981	0.173836	0.340008	0.992329	0.103023	0.875791	0.223715	0.438833	0.0286355	0.436957
THCA	0.00202575	0.00383549	0.00128364	0.0897318	1.37656e-05	0.00115688	0.00132004	0.000179748	0.000368113	0.00025898	4.09852e-06	3.92912e-05	0.000298664	0.00146176	7.09663e-07	0.552214	1.20988e-23	0.867682	0.0321641	0.000595782	2.13603e-10	0.44749	3.36972e-07	0.000636032	0.000226147	0.000161868	2.96009e-09	0.684105	3.51857e-05	0.971402	1.1143e-05	0.942978	2.19951e-07	3.28263e-07	2.28953e-18	0.429336	3.84138e-08	0.525184	0.000246155	5.25955e-15	2.58999e-18	1.32101e-10	2.05795e-05	1.57268e-05	1.46177e-07	1.60772e-05	7.67817e-05
THYM	0.478798	4.85433e-05	0.117298	1.88836e-18	2.44478e-19	5.4021e-05	1.36059e-05	0.395267	2.78331e-17	0.0371196	0.0742809	6.38325e-10	9.48689e-11	0.00957207	0.00615151	1.78388e-12	1.23225e-10	0.0144571	0.076288	4.12623e-20	6.98406e-12	4.59703e-05	0.00125615	0.578872	0.605526	1.10182e-20	0.954829	0.574695	0.694043	0.0344497	0.375699	0.000337732	0.810323	0.0214159	0.0411805	9.15351e-07	0.131569	0.00402347	0.235725	1.84961e-07	0.848033	0.686304	0.0298415	0.0016416	9.28886e-05	0.636324	0.147202
UCEC	0.589691	0.138908	6.35135e-05	0.00975788	0.0271436	0.139229	0.847495	2.37356e-05	0.444954	1.27992e-06	0.0354738	0.523225	0.132743	0.873455	0.885076	0.623468	0.0115994	0.735414	0.0283658	0.937081	0.00179446	0.794564	1.8348e-16	0.387683	1.32753e-08	0.78058	0.683018	0.992909	0.0181602	0.000165922	0.760641	0.00102563	0.331994	0.0799912	0.0293774	0.0607135	0.521163	0.0155952	0.152331	1.38664e-09	0.984689	0.00129751	0.286037	0.0283584	0.742795	2.35396e-05	0.909805
UCS	0.687957	0.447618	0.380586	0.0807967	0.526503	0.904365	0.532221	0.0787977	0.91437	0.949924	0.228659	0.160267	0.16353	0.604752	0.385295	0.281314	0.420577	0.550583	0.353679	0.0549261	0.836298	0.980752	0.413606	0.470598	0.469898	0.140074	0.917338	0.814171	0.303415	0.0432333	0.606778	0.00171698	0.758866	0.863569	0.686746	0.234869	0.00867249	0.604868	0.198127	0.0470097	0.498079	0.497414	0.801266	0.311765	0.225032	0.216049	0.55586
UVM	0.403717	0.446797	0.771556	0.993683	0.490129	0.688445	0.080593	0.66163	0.556054	0.501844	0.703193	0.338529	0.596384	0.599302	0.628175	0.858823	0.806952	0.448708	0.0622613	0.976386	0.330988	0.396033	0.403475	0.417364	0.175424	0.647224	0.359262	0.696733	0.811025	1	0.259145	0.180205	0.874273	0.59977	0.346299	0.75772	0.805246	0.323396	0.921049	0.493572	0.849784	0.826445	0.608635	0.740683	0.734765	0.0152549	0.606968
