# Supplementary material for: RecQ mediated genome instability 2 (RMI2): a potential prognostic and immunological biomarker for pan-cancers
Source: Aging (Albany NY). 2022 May 12;14(9):4107–36. doi: 10.18632/aging.204076 (PMC9134953; doi:10.18632/aging.204076)
Supplement: Supplementary Table 9 [file aging-14-204076-s007.xls]

## Sheet: Table 9
Supplementary Table 9. Results of correlation analysis and P values for the association between RMI2 and m6a-related genes.
correlation analysis
CancerType	ALKBH5	FTO	HNRNPC	YTHDF2	YTHDF1	YTHDC2	YTHDC1	ZC3H13	RBM15	WTAP	METTL14	METTL3
ACC	0.155958	-0.00431045	0.654416	0.481079	0.201912	0.184983	0.37868	0.157335	0.597242	0.347222	0.0269671	0.410279
BLCA	0.136792	-0.0586939	0.222963	0.196558	0.221033	-0.146907	0.111644	-0.0766603	0.25433	0.132856	0.143814	0.0735831
BRCA	0.00938715	-0.259675	0.235727	0.00453643	0.270099	-0.172912	-0.033085	-0.242735	0.206038	0.116796	-0.158483	0.0449906
CESC	0.0838718	0.100108	0.0798822	-0.108707	-0.0792904	-0.0392619	0.145571	-0.0436183	0.147523	0.127445	0.0837713	0.068827
CHOL	0.353631	0.141423	0.315843	-0.0676671	0.0840971	-0.0979095	0.42884	0.071722	0.172601	0.039071	0.0883455	0.230133
COAD	0.0705681	0.0763443	0.211374	0.111997	0.172901	0.00853978	0.127404	-0.0377279	0.0589652	0.237918	0.113728	0.195378
DLBC	0.102038	-0.0876042	0.145392	-0.0642125	-0.155244	-0.109434	-0.109352	-0.159702	0.00295119	-0.0113421	-0.229526	-0.319103
ESCA	0.260511	0.271287	0.591331	0.245634	0.249294	-0.22897	0.139567	-0.00379007	0.181495	0.305181	0.120874	0.200296
GBM	0.268386	0.129537	0.222388	0.422135	0.110396	0.121772	0.317085	0.0903454	0.527195	-0.14941	0.180782	0.2057
HNSC	0.215393	-0.0833983	0.390692	0.176309	0.125342	0.159656	0.380802	-0.0703482	0.500714	0.375457	0.344133	0.316059
KICH	0.344111	0.289401	0.350113	0.388097	0.280864	0.333721	0.226378	0.194528	0.211669	-0.0254212	0.226011	0.397543
KIRC	-0.075922	-0.118503	0.043546	-0.0803359	0.100036	-0.100356	-0.0677293	-0.0109827	0.0096517	-0.0594445	-0.0745866	0.0252864
KIRP	-0.0943662	0.169482	0.230348	-0.0580389	0.0233752	0.0703285	0.138868	0.104556	0.0280213	0.0374781	-0.0276458	-0.0319757
LAML	0.227155	0.193497	0.38813	0.204364	0.156211	-0.0924292	-0.015229	0.269504	0.0947207	-0.00798161	0.292961	-0.114821
LGG	0.179296	-0.237512	0.125201	0.345466	0.286683	0.261464	-0.0832843	-0.0784542	0.322406	0.291644	-0.0298172	0.00694527
LIHC	0.106142	0.0278273	0.442134	0.288031	0.462805	0.108398	0.368505	-0.113267	0.472999	0.461669	0.0870722	0.303621
LUAD	0.0653252	-0.130133	0.290517	0.0630761	0.260939	-0.128242	0.0766185	-0.00948973	0.247798	0.249511	-0.0537772	0.173587
LUSC	0.106676	-0.101392	0.371828	0.107006	0.155436	0.109046	0.287194	0.0231436	0.28067	0.0872141	0.156294	0.222239
MESO	0.149145	-0.0743231	0.159181	-0.0284463	0.0272368	-0.161483	-0.145043	-0.0432041	0.0958178	0.0347695	-0.193309	-0.0381242
OV	0.157254	-0.0154389	0.265476	0.0340277	0.133738	-0.117539	0.143591	-0.142675	0.181916	0.196241	0.0854446	0.105071
PAAD	-0.305925	-0.255598	0.387636	0.243376	0.126556	-0.169866	-0.0930117	-0.12051	0.377294	0.0367035	-0.363924	0.0165789
PCPG	0.0699688	0.0242512	0.0848629	-0.0450073	0.0642594	-0.0367034	0.108244	0.00970312	-0.0303784	0.0378822	0.0965793	0.000211566
PRAD	0.0363344	-0.0664405	0.28243	0.137817	0.194041	-0.0140823	0.122667	-0.0559266	0.173262	-0.0963167	-0.0233124	0.0628642
READ	0.0494534	0.0816147	0.218448	0.199465	0.163576	0.116963	0.18143	0.0837388	0.323686	0.26691	0.129845	0.157879
SARC	0.28926	-0.258206	0.167556	0.210614	0.0976096	0.00541711	0.153477	-0.0234125	0.538892	0.241267	0.167316	0.259429
SKCM	0.0424458	0.0210882	0.267188	0.0637321	0.107566	-0.0304133	0.109909	0.0307758	0.192631	0.117389	0.0654757	0.159452
STAD	-0.0409558	-0.211995	0.496194	0.269376	0.268347	-0.0715228	0.0748379	-0.0148967	0.273442	0.171439	-0.132808	0.227004
TGCT	0.0552812	-0.0117252	0.256368	0.187181	0.160306	-0.122611	0.0478354	-0.103687	0.0274276	0.0501541	0.030495	-0.0459597
THCA	-0.294542	-0.339239	0.33306	-0.00152983	-0.0790921	-0.183976	-0.0792269	-0.183416	-0.094052	0.0966776	-0.118322	-0.071801
THYM	0.0937495	-0.533905	0.292514	0.148476	-0.0872673	-0.379454	-0.249862	-0.322594	0.658178	0.318349	-0.265558	-0.0709359
UCEC	0.0733762	-0.127175	0.413404	0.183656	0.358062	0.01857	0.197991	0.0646791	0.312016	0.34021	0.189059	0.243864
UCS	-0.166243	-0.0740836	0.212436	-0.18629	0.221809	-0.135833	0.0369597	-0.0349307	0.17014	0.296407	-0.213861	0.156475
UVM	0.0501883	0.0589725	0.251441	0.115486	0.0342234	0.030467	0.075662	0.242751	0.155789	0.142001	0.0751823	0.0951625
P Value
CancerType	ALKBH5	FTO	HNRNPC	YTHDF2	YTHDF1	YTHDC2	YTHDC1	ZC3H13	RBM15	WTAP	METTL14	METTL3
ACC	0.169906	0.969926	6.1165e-11	7.19517e-06	0.0743489	0.102663	0.000579062	0.16612	6.24721e-09	0.00171769	0.813502	0.000173154
BLCA	0.00547252	0.235106	5.01946e-06	6.02278e-05	6.08384e-06	0.00283191	0.0236015	0.120735	1.72698e-07	0.00699293	0.00347914	0.136425
BRCA	0.755378	1.80004e-18	2.09495e-15	0.880323	6.56655e-20	7.36555e-09	0.27205	2.86919e-16	4.76323e-12	0.000100388	1.20087e-07	0.13519
CESC	0.143267	0.0803958	0.163355	0.0575051	0.166506	0.493813	0.0107841	0.447106	0.00976057	0.0257905	0.143749	0.229954
CHOL	0.034361	0.410657	0.0605822	0.694967	0.625804	0.569972	0.00906253	0.677643	0.314109	0.821016	0.608392	0.176928
COAD	0.126179	0.0979491	3.70028e-06	0.0150237	0.000162695	0.85335	0.00562395	0.413983	0.201459	1.74227e-07	0.0135249	1.95342e-05
DLBC	0.490123	0.553796	0.324132	0.66458	0.292058	0.459045	0.459381	0.27825	0.984117	0.939012	0.116574	0.0270575
ESCA	0.000813721	0.000479586	1.18333e-16	0.00162928	0.00137863	0.00338116	0.0765069	0.961823	0.0208111	7.85242e-05	0.125476	0.0106017
GBM	0.000435678	0.0942257	0.00376357	1.20296e-08	0.154283	0.115852	2.81682e-05	0.24416	2.11168e-13	0.0532383	0.019024	0.00747439
HNSC	1.10909e-06	0.0618787	9.39002e-20	7.14017e-05	0.00491678	0.000329049	9.05251e-19	0.115442	3.25087e-33	2.98464e-18	2.10778e-15	4.15442e-13
KICH	0.00500434	0.0193752	0.00424955	0.00140104	0.0234337	0.00659373	0.0697813	0.120477	0.0905206	0.840692	0.0702479	0.00104108
KIRC	0.0793437	0.00606485	0.314731	0.0633352	0.0206552	0.0202504	0.117649	0.799925	0.823748	0.169767	0.0847873	0.559488
KIRP	0.109411	0.00385692	7.7427e-05	0.325502	0.692319	0.233308	0.0181773	0.0759614	0.635221	0.525696	0.639762	0.588253
LAML	0.00503339	0.0172886	8.46929e-07	0.0118351	0.0554437	0.258995	0.852764	0.000818857	0.247322	0.922515	0.000261756	0.160358
LGG	3.35828e-05	3.21762e-08	0.00392439	2.83576e-16	1.82147e-11	1.02171e-09	0.0555774	0.0713948	2.92249e-14	7.85206e-12	0.49377	0.873381
LIHC	0.0402062	0.591643	2.48773e-19	1.40925e-08	2.99285e-21	0.036128	1.79246e-13	0.0285102	3.02085e-22	3.84576e-21	0.0926746	2.04501e-09
LUAD	0.134589	0.00278801	1.0896e-11	0.148563	1.23295e-09	0.00321522	0.079153	0.828106	8.42568e-09	6.59871e-09	0.218203	6.2776e-05
LUSC	0.0169129	0.0232288	7.14418e-18	0.0165743	0.000479976	0.0146075	5.72602e-11	0.605297	1.59982e-10	0.0510621	0.000446095	5.03622e-07
MESO	0.170513	0.496441	0.143212	0.794869	0.803412	0.137441	0.182711	0.692858	0.380162	0.750624	0.0745371	0.727463
OV	0.0021375	0.764492	1.55763e-07	0.508964	0.00914132	0.0221019	0.00509911	0.00539164	0.000371449	0.000120439	0.096719	0.0409124
PAAD	3.28431e-05	0.000574325	9.00335e-08	0.00106216	0.0923073	0.0234004	0.21688	0.109083	2.08698e-07	0.626684	5.93111e-07	0.826146
PCPG	0.346608	0.744527	0.253371	0.545191	0.387466	0.621816	0.144687	0.896278	0.683105	0.61066	0.193399	0.997732
PRAD	0.418008	0.138318	1.32362e-10	0.00203139	1.26989e-05	0.753672	0.00607551	0.212343	0.00010019	0.0314636	0.603395	0.160872
READ	0.525645	0.294398	0.0045667	0.00975724	0.034666	0.132244	0.0189513	0.281969	1.98146e-05	0.000488817	0.0944351	0.0415786
SARC	1.83266e-06	2.23949e-05	0.00645676	0.000586121	0.114292	0.930327	0.0127058	0.705483	3.27062e-21	7.7304e-05	0.00653434	2.04102e-05
SKCM	0.358018	0.648028	3.84601e-09	0.167317	0.0195416	0.510253	0.0170235	0.505222	2.56551e-05	0.010782	0.155976	0.00051358
STAD	0.429067	3.49293e-05	1.05676e-24	1.1755e-07	1.31852e-07	0.166917	0.14806	0.77371	7.43276e-08	0.0008575	0.0100342	9.02421e-06
TGCT	0.49307	0.884494	0.00123597	0.0192937	0.0456016	0.127296	0.553182	0.197708	0.733947	0.534088	0.705499	0.568867
THCA	1.14895e-11	3.35135e-15	1.12089e-14	0.972507	0.0743318	2.91112e-05	0.0738381	3.08152e-05	0.0337128	0.0290324	0.00747418	0.105317
THYM	0.310522	4.0336e-10	0.00124582	0.107064	0.345309	2.08154e-05	0.00613435	0.000346115	4.16527e-16	0.000418106	0.00351253	0.443309
UCEC	0.0861466	0.00285993	4.9236e-24	1.51621e-05	5.08923e-18	0.664465	3.00337e-06	0.130477	7.7292e-14	2.57947e-16	8.35409e-06	7.32921e-09
UCS	0.220752	0.587382	0.115981	0.169227	0.100389	0.318185	0.786825	0.798275	0.209965	0.0265419	0.113497	0.249465
UVM	0.658409	0.60333	0.0244591	0.307681	0.763129	0.788485	0.504742	0.0300352	0.167608	0.20894	0.507455	0.401093
