# Supplementary material for: RecQ mediated genome instability 2 (RMI2): a potential prognostic and immunological biomarker for pan-cancers
Source: Aging (Albany NY). 2022 May 12;14(9):4107–36. doi: 10.18632/aging.204076 (PMC9134953; doi:10.18632/aging.204076)
Supplement: Supplementary Table 11 [file aging-14-204076-s009.xls]

## Sheet: Table 11
Supplementary Table 11. Detailed information on GO analysis of various tumor types.
ACC
ID	Description	setSize	enrichmentScore	NES	pvalue	p.adjust	qvalues	rank	leading_edge	core_enrichment
GOBP_CELL_FATE_COMMITMENT	GOBP_CELL_FATE_COMMITMENT	249	0.510429	1.31642	0.0113636	1	1	11076	tags=31%, list=20%, signal=25%	MIR208A/MIR206/NEUROD1/ISL2/ISL1/WNT2/WNT1/LHX3/NKX2-1/BARHL2/TLX3/NEUROG1/WT1/MYOG/WNT10B/FEV/TRIM15/FGF8/TBX5/FOXN4/FOXA2/PTF1A/ONECUT1/TBX4/WNT7B/NKX6-2/PAX2/NTF4/WNT3A/TBXT/POU4F1/ATOH1/GBX1/NR2E1/DLX2/NODAL/ESRP1/FGF10/GSX2/SOX1/DMRTA2/TBX20/TBX1/LBX1/SIX2/WNT8B/TBR1/IL23R/GSC/DLX1/DMRT3/POU5F1/TBX18/IL6/BCL11B/GATA3/NKX2-2/ONECUT2/MNX1/GATA5/PITX1/OLIG2/GCM1/SOX2/HOXC10/DBX1/SPDEF/GLI2/TBX1…
GOBP_PATTERN_SPECIFICATION_PROCESS	GOBP_PATTERN_SPECIFICATION_PROCESS	426	0.476918	1.27224	0.0113636	1	1	13350	tags=29%, list=24%, signal=22%	HES3/NEUROD1/ALX3/ISL1/WNT2/DMRT2/WNT1/SP8/LHX3/NKX2-1/NEUROG1/HAND2/WT1/GBX2/ROBO2/IRX4/OTX1/FGF8/SEMA3A/DAW1/TBX5/FOXN4/FOXA2/FOXD1/LMX1B/WNT7B/PAX2/NTF4/BMP7/WNT3A/TBXT/PITX2/HES2/RAX/HOXD13/ZIC3/LRP2/MSGN1/DLX2/CDX1/NODAL/HES7/CDX2/FGF10/GSX2/CDX4/SOX1/HOXD12/DMRTA2/TBX20/TBX1/LHX1/LEFTY1/GDNF/MEIS3/LBX1/SIX2/ZIC1/GREM1/WNT8B/TBR1/STIL/HELT/NKX2-5/GSC/NKX3-2/EMX2/HOXC5/VAX2/DLX1/DMRT3/DLL3/FE…
GOBP_PROTEIN_DNA_COMPLEX_SUBUNIT_ORGANIZATION	GOBP_PROTEIN_DNA_COMPLEX_SUBUNIT_ORGANIZATION	276	0.543593	1.41628	0.0113636	1	1	13480	tags=27%, list=24%, signal=21%	H4C7/H1-1/TNP2/H4C13/TNP1/H2AB3/H3C15/WNT10B/H1-5/H2BC10/H3C11/H2BC7/H2BC17/H2BC14/CENPA/HJURP/KNL1/H3C7/H1-6/DLGAP5/H3C12/H3C8/CENPI/CDC45/RAD51/H1-4/H2BC3/H2BC8/H2BC11/CENPF/HELLS/DMC1/CENPM/CENPE/CDT1/PIWIL1/H2BC9/CENPK/CHD5/TAF7L/H3C1/H3C4/H2BC13/H2BC4/H1-3/H2BC6/H2BW2/CENPP/CENPL/H4C14/CHAF1B/CENPU/CENPN/H4C5/ASF1B/H4C3/H4C1/H4C8/H4C4/H3C10/CENPO/OIP5/BRDT/H2BS1/H2BC19P/H2BC15/MCM5/CENPH/H3C…
GOBP_NUCLEOSOME_ORGANIZATION	GOBP_NUCLEOSOME_ORGANIZATION	179	0.594099	1.44836	0.0116279	1	1	13480	tags=35%, list=24%, signal=26%	H4C7/H1-1/TNP2/H4C13/TNP1/H2AB3/H3C15/H1-5/H2BC10/H3C11/H2BC7/H2BC17/H2BC14/CENPA/HJURP/KNL1/H3C7/H1-6/H3C12/H3C8/CENPI/H1-4/H2BC3/H2BC8/H2BC11/CENPM/PIWIL1/H2BC9/CENPK/CHD5/H3C1/H3C4/H2BC13/H2BC4/H1-3/H2BC6/H2BW2/CENPP/CENPL/H4C14/CHAF1B/CENPU/CENPN/H4C5/ASF1B/H4C3/H4C1/H4C8/H4C4/H3C10/CENPO/OIP5/BRDT/H2BS1/H2BC19P/H2BC15/CENPH/H3C13/H2BC18/CENPW/MCM2/H4C9
GOBP_MITOTIC_NUCLEAR_DIVISION	GOBP_MITOTIC_NUCLEAR_DIVISION	296	0.505008	1.30864	0.0117647	1	1	13967	tags=29%, list=25%, signal=22%	EREG/INS/UBE2DNL/PTTG3P/NEUROG1/EPGN/SMC1B/FGF8/KIF14/EDN3/BMP7/SGO1/FBXO43/DLGAP5/HASPIN/CCNB2/KIF18B/MYBL2/KIF2C/MKI67/NUF2/NEK2/AURKB/CDC25C/NCAPG/CDC14C/KIF18A/PLK1/KIF4A/NCAPH/BUB1B/CDC20/SGO2/NDC80/PKMYT1/KIFC1/BUB1/TRIP13/CENPF/DRD3/KIF23/CDCA5/CDCA8/CENPE/CDT1/CENPK/ESPL1/KIF11/CDK1/ANLN/RAD21L1/KIF4B/CDC6/NEK6/TTK/USP44/UBE2C/CHEK1/PSRC1/SPAG5/SPHK1/PRC1/PTTG1/KIF20B/RACGAP1/ZWINT/TACC3/…
GOBP_NEGATIVE_REGULATION_OF_NITRIC_OXIDE_METABOLIC_PROCESS	GOBP_NEGATIVE_REGULATION_OF_NITRIC_OXIDE_METABOLIC_PROCESS	17	0.816262	1.50557	0.0144928	1	1	820	tags=6%, list=1%, signal=6%	MIR212
GOBP_REGULATION_OF_HEMATOPOIETIC_STEM_CELL_PROLIFERATION	GOBP_REGULATION_OF_HEMATOPOIETIC_STEM_CELL_PROLIFERATION	11	0.853311	1.48181	0.0144928	1	1	443	tags=9%, list=1%, signal=9%	MIR222
GOBP_MRNA_TRANSCRIPTION	GOBP_MRNA_TRANSCRIPTION	15	0.824749	1.48539	0.0151515	1	1	3895	tags=13%, list=7%, signal=12%	EREG/FOXE3
GOBP_NEGATIVE_REGULATION_OF_CELL_ADHESION_MOLECULE_PRODUCTION	GOBP_NEGATIVE_REGULATION_OF_CELL_ADHESION_MOLECULE_PRODUCTION	12	0.855735	1.4522	0.0151515	1	1	1083	tags=25%, list=2%, signal=25%	MIR374A/MIR222/MIR206
GOBP_MODULATION_BY_HOST_OF_VIRAL_GENOME_REPLICATION	GOBP_MODULATION_BY_HOST_OF_VIRAL_GENOME_REPLICATION	19	0.78576	1.44169	0.0153846	1	1	443	tags=5%, list=1%, signal=5%	MIR222
GOBP_PROTEIN_NITROSYLATION	GOBP_PROTEIN_NITROSYLATION	16	0.827765	1.48646	0.015625	1	1	820	tags=6%, list=1%, signal=6%	MIR212
GOCC_RNAI_EFFECTOR_COMPLEX	GOCC_RNAI_EFFECTOR_COMPLEX	16	0.788051	1.41515	0.015625	1	1	1083	tags=6%, list=2%, signal=6%	MIR206
GOBP_MEIOTIC_CELL_CYCLE	GOBP_MEIOTIC_CELL_CYCLE	246	0.503076	1.29216	0.0229885	1	1	13724	tags=35%, list=24%, signal=27%	MOS/FAM9A/EREG/ASZ1/SHCBP1L/TDRD1/HORMAD2/PTTG3P/PSMA8/SMC1B/MAPK15/SPATA22/FAM9B/SGO1/FBXO43/EXD1/EXO1/RAD54L/CCNB2/RAD51/BOLL/BRCA2/EME1/NUF2/NEK2/ZFP42/CDC25C/KIF18A/PLK1/BUB1B/CDC20/SGO2/PKMYT1/BUB1/TRIP13/TUBB8/DMC1/MOV10L1/PIWIL1/GPR3/ESPL1/XRCC2/SLC26A8/CCNE2/HUS1B/TOP2A/TEX15/TDRD12/NPPC/RAD51AP1/CDC25A/SYCE2/RAD21L1/OOEP/SYCP2/PSMC3IP/SYCE1/TTK/BRIP1/FANCD2/STRA8/NANOS2/RNF212B/MYBL1/MEI…
GOBP_CHROMATIN_ASSEMBLY_OR_DISASSEMBLY	GOBP_CHROMATIN_ASSEMBLY_OR_DISASSEMBLY	216	0.532554	1.33187	0.0232558	1	1	14166	tags=31%, list=25%, signal=23%	H4C7/H1-1/H4C13/TNP1/H2AB3/H3C15/HMGA2/H1-5/H2BC10/H3C11/H2BC7/H2BC17/H2BC14/CENPA/HJURP/KNL1/H3C7/H1-6/H3C12/H3C8/CENPI/H1-4/H2BC3/APOBEC1/H2BC8/H2BC11/HELLS/CENPM/H2BC9/CENPK/H3C1/H3C4/H2BC13/H2BC4/H1-3/H2BC6/H2BW2/CENPP/CENPL/H4C14/CHAF1B/CENPU/CENPN/H4C5/ASF1B/TET1/H4C3/H4C1/H4C8/H4C4/H3C10/CENPO/OIP5/H2BS1/H2BC19P/H2BC15/CENPH/H3C13/H2BC18/CENPW/MCM2/H4C9/DNMT3A/SETSIP/H3-4/SUV39H2
GOBP_NUCLEOSOME_ASSEMBLY	GOBP_NUCLEOSOME_ASSEMBLY	141	0.596559	1.44629	0.0240964	1	1	13480	tags=40%, list=24%, signal=31%	H4C7/H1-1/H4C13/H2AB3/H3C15/H1-5/H2BC10/H3C11/H2BC7/H2BC17/H2BC14/CENPA/HJURP/KNL1/H3C7/H1-6/H3C12/H3C8/CENPI/H1-4/H2BC3/H2BC8/H2BC11/CENPM/H2BC9/CENPK/H3C1/H3C4/H2BC13/H2BC4/H1-3/H2BC6/H2BW2/CENPP/CENPL/H4C14/CHAF1B/CENPU/CENPN/H4C5/ASF1B/H4C3/H4C1/H4C8/H4C4/H3C10/CENPO/OIP5/H2BS1/H2BC19P/H2BC15/CENPH/H3C13/H2BC18/CENPW/MCM2/H4C9
GOBP_G_PROTEIN_COUPLED_RECEPTOR_SIGNALING_PATHWAY_INVOLVED_IN_HEART_PROCESS	GOBP_G_PROTEIN_COUPLED_RECEPTOR_SIGNALING_PATHWAY_INVOLVED_IN_HEART_PROCESS	13	-0.80322	-1.45337	0.025641	1	1	191	tags=23%, list=0%, signal=23%	CHGA/PLN/MIR30E
GOBP_NEGATIVE_REGULATION_OF_GLUCOSE_IMPORT	GOBP_NEGATIVE_REGULATION_OF_GLUCOSE_IMPORT	13	-0.851782	-1.54124	0.025641	1	1	524	tags=46%, list=1%, signal=46%	ENPP1/LEP/TNF/OSTN/MIR107/MIR103A1
GOBP_POSITIVE_REGULATION_OF_NECROTIC_CELL_DEATH	GOBP_POSITIVE_REGULATION_OF_NECROTIC_CELL_DEATH	14	-0.871756	-1.62928	0.025641	1	1	524	tags=29%, list=1%, signal=28%	RIPK3/MTCO2P12/MIR107/MIR103A1
GOBP_URONIC_ACID_METABOLIC_PROCESS	GOBP_URONIC_ACID_METABOLIC_PROCESS	25	-0.879367	-1.87025	0.0263158	1	1	4626	tags=56%, list=8%, signal=51%	UGT2A1/UGT1A10/UGT2A3/UGT2B28/UGT2B7/UGT2B17/UGT1A9/UGT1A6/UGT1A7/UGT2B15/UGT1A8/UGT1A4/UGT1A1/UGT1A3
GOBP_NEGATIVE_REGULATION_OF_GENE_EXPRESSION_EPIGENETIC	GOBP_NEGATIVE_REGULATION_OF_GENE_EXPRESSION_EPIGENETIC	122	0.570872	1.32804	0.0266667	1	1	13682	tags=34%, list=24%, signal=26%	H1-1/H4C13/TNP1/H2AB3/H3C15/H2AC12/H2AC4/H1-5/H3C11/H3C7/H1-6/H3C12/H3C8/CDC45/H2AC16/H1-4/H2AC21/H2AC7/HOTAIR/H3C1/DYDC1/H2AC17/H3C4/H1-3/H2AC13/EZH2/H4C14/H4C5/H4C3/H4C1/H4C8/H4C4/H3C10/CDKN2B-AS1/DYDC2/H2AC11/ATAD2/MSL3P1/H3C13/H4C9/H2AC8/DNMT3A
GOBP_NEGATIVE_REGULATION_OF_INNATE_IMMUNE_RESPONSE	GOBP_NEGATIVE_REGULATION_OF_INNATE_IMMUNE_RESPONSE	64	0.673047	1.47896	0.0266667	1	1	3476	tags=9%, list=6%, signal=9%	MIR181B1/OTOP1/SERPINB4/MMP12/INS/ACOD1
GOBP_DEFENSE_RESPONSE_TO_FUNGUS	GOBP_DEFENSE_RESPONSE_TO_FUNGUS	39	-0.782503	-1.91957	0.027027	1	1	5141	tags=36%, list=9%, signal=33%	CLEC6A/DEFB119/RNASE8/HRG/DEFA4/DEFA3/DCD/LTF/DEFB114/HTN1/CTSG/IL17A/DEFA5/DEFA6
GOBP_NEGATIVE_REGULATION_OF_CELLULAR_RESPONSE_TO_INSULIN_STIMULUS	GOBP_NEGATIVE_REGULATION_OF_CELLULAR_RESPONSE_TO_INSULIN_STIMULUS	39	-0.658746	-1.61598	0.027027	1	1	524	tags=10%, list=1%, signal=10%	GRB14/TRIM72/MIR107/MIR103A1
GOBP_NEGATIVE_REGULATION_OF_INTERLEUKIN_1_BETA_PRODUCTION	GOBP_NEGATIVE_REGULATION_OF_INTERLEUKIN_1_BETA_PRODUCTION	40	-0.569549	-1.36281	0.027027	1	1	6610	tags=30%, list=12%, signal=27%	MIR27B/CD33/MIR181A2/FFAR4/IGF1/MIR98/NLRP3/CX3CR1/MIR877/PYDC2/MIR920/MIR488
GOBP_NEGATIVE_REGULATION_OF_VASCULAR_ENDOTHELIAL_GROWTH_FACTOR_PRODUCTION	GOBP_NEGATIVE_REGULATION_OF_VASCULAR_ENDOTHELIAL_GROWTH_FACTOR_PRODUCTION	19	-0.787676	-1.5439	0.027027	1	1	2881	tags=26%, list=5%, signal=25%	MIR147A/MIR302D/MIR361/MIR107/MIR373
GOMF_MHC_PROTEIN_BINDING	GOMF_MHC_PROTEIN_BINDING	39	-0.598798	-1.46892	0.027027	1	1	10930	tags=49%, list=19%, signal=39%	CD8A/LILRB1/MARCHF1/KLRD1/CD74/CD8B/LILRB2/FCRL6/CD4/TRBV7-9/CLEC7A/TRGV3/TRAV29DV5/TRGV9/TRAV8-4/KIR3DL2/TRBV12-3/CD244/CD8B2
HP_ABNORMALITY_OF_KREBS_CYCLE_METABOLISM	HP_ABNORMALITY_OF_KREBS_CYCLE_METABOLISM	19	-0.77719	-1.52334	0.027027	1	1	5614	tags=16%, list=10%, signal=14%	MT-TV/MT-TW/MT-TK
HP_EPISODIC_VOMITING	HP_EPISODIC_VOMITING	39	-0.664866	-1.63099	0.027027	1	1	7980	tags=18%, list=14%, signal=15%	MT-TS2/MT-TF/ARG1/MT-TV/MT-TW/MT-TQ/MT-TK
GOBP_CELLULAR_GLUCURONIDATION	GOBP_CELLULAR_GLUCURONIDATION	20	-0.895703	-1.76422	0.0277778	1	1	4626	tags=70%, list=8%, signal=64%	UGT2A1/UGT1A10/UGT2A3/UGT2B28/UGT2B7/UGT2B17/UGT1A9/UGT1A6/UGT1A7/UGT2B15/UGT1A8/UGT1A4/UGT1A1/UGT1A3
GOBP_ESTROGEN_METABOLIC_PROCESS	GOBP_ESTROGEN_METABOLIC_PROCESS	38	-0.621721	-1.52049	0.0277778	1	1	8232	tags=39%, list=15%, signal=34%	UGT2B11/CYP3A5/UGT2B4/CYP2C8/PDGFRA/AKR1B15/RDH8/CYP3A7/CYP3A4/UGT2B7/UGT2B17/UGT1A7/UGT2B15/UGT1A1/UGT1A3
GOBP_FLAVONOID_METABOLIC_PROCESS	GOBP_FLAVONOID_METABOLIC_PROCESS	15	-0.858915	-1.5888	0.0277778	1	1	4998	tags=67%, list=9%, signal=61%	SULT1A4/UGT1A10/PPARGC1A/UGT1A9/UGT1A6/UGT1A7/UGT1A8/UGT1A4/UGT1A1/UGT1A3
GOBP_LIPOPROTEIN_LOCALIZATION	GOBP_LIPOPROTEIN_LOCALIZATION	15	-0.796697	-1.47371	0.0277778	1	1	585	tags=20%, list=1%, signal=20%	LRP1/CD36/MIR128-1
GOBP_POSITIVE_REGULATION_OF_GLUCONEOGENESIS	GOBP_POSITIVE_REGULATION_OF_GLUCONEOGENESIS	15	-0.80176	-1.48308	0.0277778	1	1	3337	tags=20%, list=6%, signal=19%	PPARGC1A/MIR107/MIR103A1
GOBP_REGULATION_OF_GLUCONEOGENESIS	GOBP_REGULATION_OF_GLUCONEOGENESIS	47	-0.583712	-1.46249	0.0277778	1	1	3337	tags=9%, list=6%, signal=8%	PPARGC1A/ADIPOQ/MIR107/MIR103A1
GOMF_ISOPRENOID_BINDING	GOMF_ISOPRENOID_BINDING	38	-0.606944	-1.48436	0.0277778	1	1	7568	tags=29%, list=13%, signal=25%	CYP26A1/ALDH1A2/OPN4/PTGDS/RBP4/ADH4/UGT1A9/UGT1A7/UGT1A8/UGT1A1/UGT1A3
GOBP_POSITIVE_REGULATION_OF_CELLULAR_RESPONSE_TO_TRANSFORMING_GROWTH_FACTOR_BETA_STIMULUS	GOBP_POSITIVE_REGULATION_OF_CELLULAR_RESPONSE_TO_TRANSFORMING_GROWTH_FACTOR_BETA_STIMULUS	28	0.733338	1.45443	0.028169	1	1	60	tags=4%, list=0%, signal=4%	MIR30B
GOBP_NECROPTOTIC_PROCESS	GOBP_NECROPTOTIC_PROCESS	41	-0.68165	-1.63837	0.0285714	1	1	524	tags=24%, list=1%, signal=24%	BIRC3/FAS/RIPK3/FASLG/LY96/TLR4/CD14/TNF/MIR107/MIR103A1
GOBP_ORGAN_OR_TISSUE_SPECIFIC_IMMUNE_RESPONSE	GOBP_ORGAN_OR_TISSUE_SPECIFIC_IMMUNE_RESPONSE	41	-0.558943	-1.34344	0.0285714	1	1	7452	tags=32%, list=13%, signal=28%	UMOD/PIGR/APOA4/XCL1/DEFB1/DEFA4/DEFA3/CAMP/LTF/RAB17/C17orf99/DEFA5/DEFA6
GOBP_POSITIVE_REGULATION_OF_GLUCOSE_METABOLIC_PROCESS	GOBP_POSITIVE_REGULATION_OF_GLUCOSE_METABOLIC_PROCESS	41	-0.573908	-1.37941	0.0285714	1	1	5532	tags=12%, list=10%, signal=11%	IGF1/PTH/PPARGC1A/MIR107/MIR103A1
HP_BASAL_GANGLIA_CALCIFICATION	HP_BASAL_GANGLIA_CALCIFICATION	41	-0.580517	-1.39529	0.0285714	1	1	14852	tags=49%, list=26%, signal=36%	PSMB8/ACVR1/MT-CO3/MT-CO2/MT-ND4/MT-CO1/MT-ND1/MT-ND6/SAMHD1/MT-ND5/CYP2U1/TREM2/TYROBP/MT-TL1/MT-TH/MT-TS2/MT-TF/MT-TW/CASR/MT-TQ
GOBP_NEGATIVE_REGULATION_OF_PROTEIN_SUMOYLATION	GOBP_NEGATIVE_REGULATION_OF_PROTEIN_SUMOYLATION	11	0.838553	1.45618	0.0289855	1	1	3841	tags=27%, list=7%, signal=25%	MAGEA2/MAGEA2B/FSCB
GOBP_PROGRAMMED_NECROTIC_CELL_DEATH	GOBP_PROGRAMMED_NECROTIC_CELL_DEATH	49	-0.641827	-1.60709	0.0294118	1	1	524	tags=31%, list=1%, signal=30%	TLR3/ASAH1/SLC25A4/BIRC3/FAS/RIPK3/NUPR1/FASLG/CASP1/LY96/TLR4/CD14/TNF/MIR107/MIR103A1
HP_ABNORMAL_CIRCULATING_PYRUVATE_FAMILY_AMINO_ACID_CONCENTRATION	HP_ABNORMAL_CIRCULATING_PYRUVATE_FAMILY_AMINO_ACID_CONCENTRATION	42	-0.652783	-1.56749	0.0294118	1	1	5614	tags=10%, list=10%, signal=9%	CA5A/MT-TV/MT-TW/MT-TK
HP_FOCAL_T2_HYPERINTENSE_BASAL_GANGLIA_LESION	HP_FOCAL_T2_HYPERINTENSE_BASAL_GANGLIA_LESION	44	-0.702454	-1.72958	0.0294118	1	1	5614	tags=7%, list=10%, signal=6%	MT-TV/MT-TW/MT-TK
GOBP_ASPARTATE_FAMILY_AMINO_ACID_BIOSYNTHETIC_PROCESS	GOBP_ASPARTATE_FAMILY_AMINO_ACID_BIOSYNTHETIC_PROCESS	21	0.752516	1.39831	0.030303	1	1	1103	tags=5%, list=2%, signal=5%	GOT1L1
GOBP_NEGATIVE_REGULATION_OF_GLUCOSE_TRANSMEMBRANE_TRANSPORT	GOBP_NEGATIVE_REGULATION_OF_GLUCOSE_TRANSMEMBRANE_TRANSPORT	18	-0.828344	-1.57287	0.030303	1	1	524	tags=33%, list=1%, signal=33%	ENPP1/LEP/TNF/OSTN/MIR107/MIR103A1
GOBP_REGULATION_OF_NECROTIC_CELL_DEATH	GOBP_REGULATION_OF_NECROTIC_CELL_DEATH	37	-0.714081	-1.69539	0.030303	1	1	524	tags=27%, list=1%, signal=27%	SLC6A6/ASAH1/SLC25A4/BIRC3/HEBP2/RIPK3/MTCO2P12/NUPR1/MIR107/MIR103A1
GOBP_REGULATION_OF_PROGRAMMED_NECROTIC_CELL_DEATH	GOBP_REGULATION_OF_PROGRAMMED_NECROTIC_CELL_DEATH	26	-0.779965	-1.60967	0.030303	1	1	524	tags=15%, list=1%, signal=15%	RIPK3/NUPR1/MIR107/MIR103A1
GOBP_TRAIL_ACTIVATED_APOPTOTIC_SIGNALING_PATHWAY	GOBP_TRAIL_ACTIVATED_APOPTOTIC_SIGNALING_PATHWAY	12	0.829771	1.40814	0.030303	1	1	443	tags=8%, list=1%, signal=8%	MIR222
GOBP_XENOBIOTIC_GLUCURONIDATION	GOBP_XENOBIOTIC_GLUCURONIDATION	11	-0.914116	-1.58723	0.030303	1	1	4126	tags=82%, list=7%, signal=76%	UGT1A10/UGT2B28/UGT1A9/UGT1A6/UGT1A7/UGT1A8/UGT1A4/UGT1A1/UGT1A3
GOMF_FATTY_ACID_BINDING	GOMF_FATTY_ACID_BINDING	37	-0.643234	-1.52718	0.030303	1	1	9541	tags=38%, list=17%, signal=31%	OXER1/ACOX2/FABP3/FABP2/GSTA1/HNF4A/FFAR4/ALB/PTGDS/CYP4F11/GPR31/AFP/UGT1A8/AFM
HP_DEMYELINATING_PERIPHERAL_NEUROPATHY	HP_DEMYELINATING_PERIPHERAL_NEUROPATHY	45	-0.638278	-1.57326	0.030303	1	1	5632	tags=9%, list=10%, signal=8%	PLP1/MT-TV/MT-TW/MT-TK
HP_LACTICACIDURIA	HP_LACTICACIDURIA	18	-0.774308	-1.47027	0.030303	1	1	5614	tags=78%, list=10%, signal=70%	MT-ND4/MT-ND2/MT-ND3/MT-ATP6/MT-ND1/PDP1/MT-ND6/MT-ND5/GATM/LDHD/MT-TL1/MT-TV/MT-TW/MT-TK
GOBP_REGULATION_OF_PEPTIDYL_CYSTEINE_S_NITROSYLATION	GOBP_REGULATION_OF_PEPTIDYL_CYSTEINE_S_NITROSYLATION	10	0.855936	1.45535	0.0307692	1	1	820	tags=10%, list=1%, signal=10%	MIR212
GOMF_MAP_KINASE_KINASE_KINASE_ACTIVITY	GOMF_MAP_KINASE_KINASE_KINASE_ACTIVITY	25	0.741267	1.4049	0.03125	1	1	1222	tags=4%, list=2%, signal=4%	MOS
HP_INCREASED_SERUM_PYRUVATE	HP_INCREASED_SERUM_PYRUVATE	52	-0.680914	-1.71974	0.03125	1	1	4	tags=10%, list=0%, signal=10%	MT-TI/MT-TL1/MT-TF/COX6A2/MT-TK
HP_MITOCHONDRIAL_INHERITANCE	HP_MITOCHONDRIAL_INHERITANCE	30	-0.715214	-1.56478	0.03125	1	1	10730	tags=37%, list=19%, signal=30%	MT-TC/MT-TI/MT-TL1/MT-TT/MT-TS2/MT-TF/MT-TV/MT-TN/MT-TW/MT-TQ/MT-TK
GOBP_ORGANELLE_FISSION	GOBP_ORGANELLE_FISSION	481	0.45743	1.23216	0.0322581	1	1	13967	tags=28%, list=25%, signal=21%	MOS/EREG/ASZ1/SHCBP1L/INS/UBE2DNL/HORMAD2/PTTG3P/NEUROG1/EPGN/PSMA8/SMC1B/MAPK15/FGF8/SPATA22/KIF14/EDN3/BMP7/SGO1/FBXO43/DLGAP5/HASPIN/RAD54L/CCNB2/KIF18B/RAD51/BRCA2/EME1/MYBL2/KIF2C/MKI67/NUF2/NEK2/AURKB/CDC25C/NCAPG/CDC14C/KIF18A/PLK1/KIF4A/NCAPH/BUB1B/CDC20/SGO2/NDC80/PKMYT1/KIFC1/BUB1/TRIP13/CENPF/DRD3/KIF23/CDCA5/CDCA8/TUBB8/DMC1/CENPE/CDT1/MOV10L1/CENPK/DNM1/GPR3/ESPL1/MTFR2/CCNE2/TOP2A/T…
GOBP_REGULATION_OF_ANTIGEN_RECEPTOR_MEDIATED_SIGNALING_PATHWAY	GOBP_REGULATION_OF_ANTIGEN_RECEPTOR_MEDIATED_SIGNALING_PATHWAY	63	-0.589677	-1.53601	0.0322581	1	1	13745	tags=48%, list=24%, signal=36%	SLA2/ELF1/PAWR/LGALS3/PRKCH/CD300A/PTPRJ/LAPTM5/CD160/PRNP/UBASH3A/LYN/PTPN6/CD226/CCR7/CD19/LCK/LILRB4/PAX5/NFAM1/FCGR2B/TESPA1/BLK/SH2D1A/PTPRC/TRAT1/FCRL3/GCSAM/STAP1/GCSAML
HP_ABNORMAL_CIRCULATING_PROTEINOGENIC_AMINO_ACID_DERIVATIVE_CONCENTRATION	HP_ABNORMAL_CIRCULATING_PROTEINOGENIC_AMINO_ACID_DERIVATIVE_CONCENTRATION	51	-0.602714	-1.50446	0.0322581	1	1	5614	tags=8%, list=10%, signal=7%	CA5A/MT-TV/MT-TW/MT-TK
HP_PERIPHERAL_DEMYELINATION	HP_PERIPHERAL_DEMYELINATION	51	-0.577511	-1.44155	0.0322581	1	1	11665	tags=27%, list=21%, signal=22%	SUMF1/ABCA1/MAT1A/TYROBP/MOCS1/FGD4/FA2H/MT-TL1/MPZ/SH3TC2/PLP1/MT-TV/MT-TW/MT-TK
HP_PROGRESSIVE_EXTERNAL_OPHTHALMOPLEGIA	HP_PROGRESSIVE_EXTERNAL_OPHTHALMOPLEGIA	36	-0.647651	-1.48788	0.0322581	1	1	8950	tags=28%, list=16%, signal=23%	MT-TL1/MT-TH/MT-TT/MT-TS2/MT-TL2/MT-TF/MT-TN/MT-TW/MT-TQ/MT-TK
HP_BULBAR_SIGNS	HP_BULBAR_SIGNS	35	-0.668943	-1.52518	0.0333333	1	1	5614	tags=9%, list=10%, signal=8%	MT-TV/MT-TW/MT-TK
HP_VENTRICULAR_PREEXCITATION	HP_VENTRICULAR_PREEXCITATION	32	-0.667434	-1.46528	0.0333333	1	1	8950	tags=25%, list=16%, signal=21%	MT-TL1/MT-TH/MT-TS2/MT-TF/MT-TV/MT-TW/MT-TQ/MT-TK
GOBP_HEME_METABOLIC_PROCESS	GOBP_HEME_METABOLIC_PROCESS	33	-0.674103	-1.50218	0.0344828	1	1	4674	tags=9%, list=8%, signal=8%	AMBP/UGT1A4/UGT1A1
GOBP_REGULATION_OF_PHOSPHATIDYLINOSITOL_3_KINASE_ACTIVITY	GOBP_REGULATION_OF_PHOSPHATIDYLINOSITOL_3_KINASE_ACTIVITY	57	-0.59141	-1.4963	0.0344828	1	1	10980	tags=32%, list=19%, signal=25%	LYN/PIK3IP1/CCR7/TNFAIP8L3/PIK3R1/CD19/TEK/CCKBR/PIK3R5/CCL21/PDGFRA/CISH/MIR138-1/VAV3/FLT3/CCL19/P2RY12/P3R3URF
HP_RAGGED_RED_MUSCLE_FIBERS	HP_RAGGED_RED_MUSCLE_FIBERS	55	-0.618521	-1.54948	0.0344828	1	1	14423	tags=53%, list=26%, signal=39%	MT-CO2/MT-RNR1/MT-ND4/MT-ND2/MT-CYB/MT-ND3/MT-ATP6/MT-CO1/MT-ND1/MT-ATP8/MT-ND6/MT-TP/TK2/MT-ND5/SLC25A4/MIEF2/MT-TE/MT-TC/MT-TI/MT-TL1/MT-TH/MT-TS2/MT-TL2/MT-TF/MT-TV/MT-TN/MT-TW/MT-TQ/MT-TK
GOBP_DNA_PACKAGING	GOBP_DNA_PACKAGING	234	0.500654	1.2719	0.0348837	1	1	14071	tags=32%, list=25%, signal=24%	H4C7/H1-1/TNP2/H4C13/TNP1/H2AB3/H3C15/HMGA2/H1-5/H2BC10/H3C11/H2BC7/H2BC17/H2BC14/CENPA/HJURP/KNL1/H3C7/H1-6/H3C12/H3C8/CENPI/H1-4/NCAPG/H2BC3/APOBEC1/NCAPH/H2BC8/H2BC11/CDCA5/HELLS/CENPM/PIWIL1/H2BC9/CENPK/CHD5/H3C1/TOP2A/PRM3/H3C4/H2BC13/H2BC4/H1-3/H2BC6/H2BW2/CENPP/CENPL/H4C14/CHAF1B/CENPU/CENPN/H4C5/ASF1B/TET1/H4C3/H4C1/H4C8/H4C4/NCAPG2/H3C10/CENPO/OIP5/CCNB1/H2BS1/H2BC19P/H2BC15/CENPH/H3C13/…
GOBP_SISTER_CHROMATID_SEGREGATION	GOBP_SISTER_CHROMATID_SEGREGATION	199	0.529654	1.31225	0.0348837	1	1	13967	tags=33%, list=25%, signal=25%	MOS/UBE2DNL/HORMAD2/PTTG3P/SMC1B/MAPK15/KIF14/SGO1/DLGAP5/HASPIN/ESCO2/KIF18B/KIF2C/NUF2/NEK2/AURKB/NCAPG/KIF18A/PLK1/KIF4A/NCAPH/BUB1B/CDC20/SGO2/NDC80/KIFC1/BUB1/TRIP13/CENPF/KIF23/CDCA5/CDCA8/CENPE/CDT1/CENPK/ESPL1/TOP2A/RMI2/RAD21L1/KIF4B/CDC6/NEK6/TTK/USP44/UBE2C/PSRC1/SPAG5/PRC1/PTTG1/RACGAP1/ZWINT/TACC3/DDX11L8/NCAPG2/FBXO5/DSCC1/CCNB1/MAD2L1/STAG3/DDX12P/GEN1/REC8/KNSTRN/KNTC1/SPDL1/NCAPD3
GOBP_ANTIBACTERIAL_HUMORAL_RESPONSE	GOBP_ANTIBACTERIAL_HUMORAL_RESPONSE	61	-0.582006	-1.48446	0.0357143	1	1	5313	tags=30%, list=9%, signal=27%	DEFB1/WFDC12/SLPI/DEFA4/KLK3/DEFA3/SEMG1/CAMP/LTF/WFDC10A/SEMG2/CTSG/FGB/KLK5/FGA/WFDC9/DEFA5/DEFA6
GOBP_CARBOHYDRATE_TRANSMEMBRANE_TRANSPORT	GOBP_CARBOHYDRATE_TRANSMEMBRANE_TRANSPORT	114	-0.460769	-1.26772	0.0357143	1	1	7732	tags=15%, list=14%, signal=13%	SLC23A1/TNF/ITLN1/SLC2A7/C3/FFAR4/IGF1/OSTN/SLC5A9/PTH/TRARG1/SLC2A5/ADIPOQ/HNF1A/SLC2A2/MIR107/MIR103A1
GOBP_NECROTIC_CELL_DEATH	GOBP_NECROTIC_CELL_DEATH	61	-0.590764	-1.50679	0.0357143	1	1	524	tags=31%, list=1%, signal=31%	SLC6A6/TLR3/ASAH1/SLC25A4/BIRC3/HEBP2/GSDME/FAS/RIPK3/MTCO2P12/NUPR1/FASLG/CASP1/LY96/TLR4/CD14/TNF/MIR107/MIR103A1
GOBP_REGULATION_OF_COMPLEMENT_ACTIVATION	GOBP_REGULATION_OF_COMPLEMENT_ACTIVATION	114	-0.659723	-1.8151	0.0357143	1	1	11914	tags=61%, list=21%, signal=49%	VTN/CR1L/IGLC3/PROS1/SERPING1/IGKV3-15/C1R/CFH/IGLV2-14/C1QB/C1QC/C1QA/C1S/CD5L/C4B/IGHV3-11/IGHG1/CD19/IGLV2-11/IGKV1-5/C4BPA/IGKV4-1/IGHG3/IGKV1-16/C3AR1/IGLV3-19/C2/IGLV1-40/IGHV3-48/IGLC2/IGKV3-20/C7/IGHV3-23/VSIG4/IGKC/IGHV3-30/IGLV2-8/IGLV1-47/C4A/IGLV6-57/IGHV2-70/IGHG4/IGHG2/C3/IGKV2-28/IGKV1-12/C8B/IGHV4-59/IGHV3-33/IGKV5-2/IGHV3-53/IGLV3-27/IGHV4-34/IGKV3D-20/CFB/IGKV1-17/CR2/IGLV7-43/I…
GOBP_RESPONSE_TO_FUNGUS	GOBP_RESPONSE_TO_FUNGUS	53	-0.717975	-1.75523	0.0357143	1	1	8775	tags=42%, list=16%, signal=35%	CHGA/HAMP/TLR4/ARG1/BTK/SCIMP/CLEC7A/SYK/CLEC6A/DEFB119/RNASE8/HRG/DEFA4/DEFA3/DCD/LTF/DEFB114/HTN1/CTSG/IL17A/DEFA5/DEFA6
GOCC_IMMUNOGLOBULIN_COMPLEX_CIRCULATING	GOCC_IMMUNOGLOBULIN_COMPLEX_CIRCULATING	66	-0.684668	-1.73751	0.0357143	1	1	10508	tags=68%, list=19%, signal=56%	IGHV3-21/IGHV3-11/IGHG1/IGHV3-15/IGHV3-74/IGHV4-28/IGHG3/IGHV3-48/IGLL5/IGLC2/IGKV3-20/IGHV3-23/IGHV3-72/IGHV3-73/IGHV1-58/IGKC/IGHV3-30/IGHM/IGHV2-70/IGHG4/IGHA1/PIGR/IGHG2/IGHV5-51/TRBC1/TRBC2/IGHV1-69D/IGHV1-45/IGHV4-59/IGHA2/IGHV3-33/TRDC/IGHV3-53/IGHV4-34/IGHV3-66/IGHV3-38/IGHV6-1/IGHV3-13/IGHV4-4/IGHD/IGHV3-43/IGHV3-7/IGHV3-20/IGHE/IGHV1OR15-1
GOMF_IMMUNOGLOBULIN_RECEPTOR_BINDING	GOMF_IMMUNOGLOBULIN_RECEPTOR_BINDING	68	-0.677358	-1.73953	0.0357143	1	1	10508	tags=65%, list=19%, signal=53%	IGHV3-21/IGHV3-11/IGHG1/IGHV3-15/IGHV3-74/IGHV4-28/IGHG3/IGHV3-48/IGLL5/IGLC2/IGHV3-23/IGHV3-72/IGHV3-73/IGHV1-58/IGKC/IGHV3-30/IGHM/TARM1/IGHV2-70/IGHG4/IGHA1/IGHG2/IGHV5-51/TRBC1/TRBC2/IGHV1-69D/IGHV1-45/IGHV4-59/IGHA2/IGHV3-33/TRDC/IGHV3-53/IGHV4-34/IGHV3-66/IGHV3-38/IGHV6-1/IGHV3-13/IGHV4-4/IGHD/IGHV3-43/IGHV3-7/IGHV3-20/IGHE/IGHV1OR15-1
GOMF_MONOCARBOXYLIC_ACID_BINDING	GOMF_MONOCARBOXYLIC_ACID_BINDING	71	-0.620477	-1.59966	0.0357143	1	1	7568	tags=25%, list=13%, signal=22%	CYP26A1/FABP2/STARD5/AKR1C2/GSTA1/HNF4A/FFAR4/ALB/PTGDS/CYP4F11/GPR31/AFP/UGT1A9/UGT1A7/UGT1A8/AFM/UGT1A1/UGT1A3
HP_ABNORMAL_BASAL_GANGLIA_MRI_SIGNAL_INTENSITY	HP_ABNORMAL_BASAL_GANGLIA_MRI_SIGNAL_INTENSITY	54	-0.590277	-1.45257	0.0357143	1	1	5614	tags=6%, list=10%, signal=5%	MT-TV/MT-TW/MT-TK
HP_MIGRAINE	HP_MIGRAINE	114	-0.486093	-1.3374	0.0357143	1	1	10983	tags=23%, list=19%, signal=18%	IL10/MT-TC/GP9/FAS/TGFBR2/MT-TL1/STAT4/ADA2/MT-TH/KCNA1/TLR4/MT-TS2/C4A/TNF/MT-TF/CCR1/IL12B/GPR101/MT-TV/NLRP3/MT-TW/SLC6A19/GRIN2A/MT-TQ/HTR1A/MT-TK
HP_VENTRICULAR_HYPERTROPHY	HP_VENTRICULAR_HYPERTROPHY	127	-0.469217	-1.31229	0.0357143	1	1	11579	tags=21%, list=20%, signal=17%	ABCA1/SLC25A4/ABCC6/SVIL/MT-TC/GNPTAB/KCNJ5/MT-TL1/ENPP1/SCN5A/NEXN/TPK1/PLN/MT-TS2/DTNA/MT-TF/TNNC1/GPR101/TLL1/MT-TV/MT-TW/SFTPB/MYL2/MT-TQ/MYOZ2/TNNT2/MT-TK
GOBP_MYOFIBRIL_ASSEMBLY	GOBP_MYOFIBRIL_ASSEMBLY	59	-0.561258	-1.42408	0.037037	1	1	8849	tags=31%, list=16%, signal=26%	LMOD2/TMOD1/OBSCN/CAPN3/PDGFRA/MYLK3/ANKRD1/KRT8/LMOD3/LMOD1/CASQ1/BMP10/CSRP3/MYL2/SYNPO2L/KRT19/MYOZ2/TNNT2
GOBP_NEGATIVE_REGULATION_OF_ANION_TRANSMEMBRANE_TRANSPORT	GOBP_NEGATIVE_REGULATION_OF_ANION_TRANSMEMBRANE_TRANSPORT	34	-0.751235	-1.67223	0.037037	1	1	524	tags=21%, list=1%, signal=20%	ENPP1/RGS4/LEP/TNF/OSTN/MIR107/MIR103A1
GOBP_REGULATION_OF_LIPID_KINASE_ACTIVITY	GOBP_REGULATION_OF_LIPID_KINASE_ACTIVITY	69	-0.585888	-1.49249	0.037037	1	1	10980	tags=28%, list=19%, signal=22%	LYN/PIK3IP1/CCR7/TNFAIP8L3/PIK3R1/CD19/TEK/CCKBR/PIK3R5/CCL21/PDGFRA/CISH/MIR138-1/VAV3/FLT3/CCL19/P2RY12/F2/P3R3URF
GOBP_TRICARBOXYLIC_ACID_CYCLE	GOBP_TRICARBOXYLIC_ACID_CYCLE	34	-0.771768	-1.71793	0.037037	1	1	1012	tags=44%, list=2%, signal=43%	DHTKD1/SUCLG1/ACO1/IDH3A/SDHA/IDH3G/ACO2/OGDH/NNT/IDH2/SUCLG2/ME3/OGDHL/PDHA1/PDHA2
GOMF_GLUCURONOSYLTRANSFERASE_ACTIVITY	GOMF_GLUCURONOSYLTRANSFERASE_ACTIVITY	34	-0.813366	-1.81053	0.037037	1	1	4626	tags=44%, list=8%, signal=41%	UGT2A1/UGT1A10/UGT2A3/UGT2B28/UGT2B7/UGT3A1/UGT2B17/UGT1A9/UGT1A6/UGT1A7/UGT2B15/UGT1A8/UGT1A4/UGT1A1/UGT1A3
HP_ABNORMAL_CIRCULATING_CARBOHYDRATE_CONCENTRATION	HP_ABNORMAL_CIRCULATING_CARBOHYDRATE_CONCENTRATION	65	-0.622686	-1.59318	0.037037	1	1	2122	tags=6%, list=4%, signal=6%	MT-TF/COX6A2/HNF1A/MT-TK
HP_HYPOTHERMIA	HP_HYPOTHERMIA	34	-0.692154	-1.54071	0.037037	1	1	9853	tags=35%, list=17%, signal=29%	MT-TL1/HLA-DRB1/PAX8/DDC/BTNL2/SCN11A/GABRA2/SCN10A/MT-TV/DBH/MT-TW/MT-TK
HP_MENINGITIS	HP_MENINGITIS	73	-0.522592	-1.35691	0.037037	1	1	10983	tags=52%, list=19%, signal=42%	IL10/JAK3/IL7/FAS/C4B/CARD9/PIK3R1/RAG1/CD19/NCF2/CTLA4/CD79B/HLA-DRB1/STAT4/BLNK/HLA-DPB1/WAS/PRF1/NCF4/TLR4/IGHM/C4A/NCF1/HLA-DPA1/CCR1/BTK/CYBB/CIITA/C8B/SH2D1A/DNASE1L3/CD79A/NLRP3/RAG2/CFB/CD40LG/CR2/TNFRSF13B
HP_SENSORIMOTOR_NEUROPATHY	HP_SENSORIMOTOR_NEUROPATHY	80	-0.512992	-1.35307	0.037037	1	1	7980	tags=18%, list=14%, signal=15%	MME/CLCF1/MT-TL1/MT-TH/MT-TS2/PIK3R5/MT-TF/MT-TV/PPP2R2B/PDYN/MT-TW/MT-TQ/GJB1/MT-TK
HP_VENTRICULAR_ARRHYTHMIA	HP_VENTRICULAR_ARRHYTHMIA	115	-0.514307	-1.40009	0.037037	1	1	10730	tags=30%, list=19%, signal=24%	MT-TC/KCNJ5/SYNE1/MT-TL1/DSP/SCN5A/ANK2/GJA5/KCNH2/MT-TH/KCNQ1/CDH23/PLN/SCN1B/MT-TS2/DSC2/DSG2/DTNA/MT-TF/SCNN1A/TNNC1/NOS1AP/SCN10A/SLC12A3/MT-TV/TNNI3K/PKP2/MT-TW/SCN2B/MYL2/TRDN/DPP6/MT-TQ/MT-TK
GOBP_B_CELL_RECEPTOR_SIGNALING_PATHWAY	GOBP_B_CELL_RECEPTOR_SIGNALING_PATHWAY	120	-0.663233	-1.82121	0.0384615	1	1	10629	tags=59%, list=19%, signal=48%	MEF2C/PTPN6/IGHV3-21/LAT2/IGHV3-11/IGHG1/BMX/CD19/LCK/IGHV3-15/CTLA4/IGHV3-74/IGHV4-28/CD79B/IGHG3/BLNK/IGHV3-48/IGLL5/IGLC2/IGHV3-23/IGHV3-72/IGHV3-73/IGHV1-58/CD38/IGKC/PAX5/IGHV3-30/KLHL6/NFAM1/IGHM/FCGR2B/IGHV2-70/IGHG4/IGHA1/BTK/MNDA/IGHG2/IGHV5-51/NCKAP1L/TRBC1/TRBC2/SYK/IGHV1-69D/IGHV1-45/BLK/IGHV4-59/CD79A/IGHA2/PTPRC/IGHV3-33/ITK/TRDC/IGHV3-53/VAV3/IGHV4-34/FCRL3/IGHV3-66/IGHV3-38/IGHV6-…
HP_ABNORMAL_CSF_METABOLITE_LEVEL	HP_ABNORMAL_CSF_METABOLITE_LEVEL	118	-0.468741	-1.29346	0.0384615	1	1	8950	tags=8%, list=16%, signal=7%	MT-TH/COQ8A/DDC/MT-TS2/MT-TF/MT-TV/MT-TN/MT-TW/MT-TQ/MT-TK
HP_MUSCLE_ABNORMALITY_RELATED_TO_MITOCHONDRIAL_DYSFUNCTION	HP_MUSCLE_ABNORMALITY_RELATED_TO_MITOCHONDRIAL_DYSFUNCTION	81	-0.555623	-1.4591	0.0384615	1	1	7980	tags=37%, list=14%, signal=32%	MT-CO3/NDUFA1/NDUFAF3/MT-CO2/MT-ND4/MT-ND2/MT-CYB/MT-ND3/MT-ATP6/MT-CO1/MT-ND1/ISCU/MT-ND6/TK2/MT-ND5/SLC25A4/MIEF2/MT-TE/MT-TC/MT-TL1/MT-TT/MT-TS2/MT-TL2/MT-TF/COX6A2/MT-TV/MT-TN/MT-TW/MT-TQ/MT-TK
GOBP_REGULATION_OF_NUCLEAR_DIVISION	GOBP_REGULATION_OF_NUCLEAR_DIVISION	134	0.557693	1.32342	0.038961	1	1	13911	tags=36%, list=25%, signal=27%	MOS/EREG/INS/EPGN/PSMA8/FGF8/EDN3/BMP7/FBXO43/DLGAP5/MKI67/NEK2/AURKB/CDC25C/PLK1/BUB1B/CDC20/NDC80/PKMYT1/BUB1/TRIP13/CENPF/DRD3/CDT1/GPR3/ESPL1/RAD51AP1/OOEP/TTK/USP44/CHEK1/STRA8/NANOS2/SPHK1/WNT5A/KIF20B/ZWINT/FBXO5/AURKA/CCNB1/MAD2L1/PDE3A/PDXP/MTBP/GEN1/BORA/KNTC1/SPDL1
GOBP_HIPPOCAMPUS_DEVELOPMENT	GOBP_HIPPOCAMPUS_DEVELOPMENT	73	0.616186	1.38247	0.04	1	1	7969	tags=23%, list=14%, signal=20%	NEUROD6/NEUROD1/LMX1A/NKX2-1/EPHA5/SLC32A1/MAS1/HTR5A/KIF14/WNT3A/ALK/LHX5/NR2E1/DLX2/EMX2/DAB1/DLX1
GOBP_PHAGOCYTOSIS_RECOGNITION	GOBP_PHAGOCYTOSIS_RECOGNITION	87	-0.642522	-1.66459	0.04	1	1	10508	tags=57%, list=19%, signal=47%	IGHV3-21/C4B/IGHV3-11/IGHG1/IGHV3-15/C4BPA/IGHV3-74/IGHV4-28/IGHG3/IGHV3-48/IGLL5/IGLC2/IGHV3-23/IGHV3-72/IGHV3-73/IGHV1-58/IGKC/IGHV3-30/MBL2/IGHM/IGHV2-70/IGHG4/IGHA1/IGHG2/IGHV5-51/TRBC1/SFTPA1/CLEC7A/TRBC2/IGHV1-69D/IGHV1-45/IGHV4-59/IGHA2/IGHV3-33/COLEC12/TRDC/IGHV3-53/IGHV4-34/IGHV3-66/IGHV3-38/IGHV6-1/LBP/IGHV3-13/IGHV4-4/IGHD/IGHV3-43/IGHV3-7/IGHV3-20/IGHE/IGHV1OR15-1
GOBP_REGULATION_OF_CHROMOSOME_SEPARATION	GOBP_REGULATION_OF_CHROMOSOME_SEPARATION	71	0.634003	1.41739	0.0405405	1	1	13911	tags=42%, list=25%, signal=32%	MOS/UBE2DNL/PTTG3P/MAPK15/DLGAP5/AURKB/PLK1/BUB1B/CDC20/NDC80/BUB1/TRIP13/CENPF/CENPE/CDT1/ESPL1/CDC6/NEK6/TTK/USP44/UBE2C/PTTG1/ZWINT/TACC3/FBXO5/CCNB1/MAD2L1/GEN1/KNTC1/SPDL1
GOBP_AEROBIC_RESPIRATION	GOBP_AEROBIC_RESPIRATION	86	-0.494252	-1.27876	0.0416667	1	1	1012	tags=35%, list=2%, signal=34%	SUCLG1/ACO1/AFG1L/IDH3A/SDHA/COX6C/UQCRC1/NDUFS7/IDH3G/UQCRB/ACO2/OGDH/MTFR1/UQCRC2/MT-CO3/BLOC1S1/NNT/MT-CO2/COX7B/IDH2/MT-ND4/MT-CO1/MT-ND1/SUCLG2/ME3/OGDHL/PDHA1/MTCO2P12/COX6A2/PDHA2
GOBP_MEMBRANE_INVAGINATION	GOBP_MEMBRANE_INVAGINATION	132	-0.580752	-1.60556	0.0416667	1	1	11390	tags=45%, list=20%, signal=36%	TREM2/FCGR1A/MSR1/F2RL1/ALOX15/ELMO1/IGHV3-21/IGHV3-11/IGHG1/IGHV3-15/IGHV3-74/IGHV4-28/IGHG3/AIF1/HAVCR1/ITGB2/IGHV3-48/IGLL5/IGLC2/IGHV3-23/IGHV3-72/IGHV3-73/IGHV1-58/IGKC/IGHV3-30/IGHM/BIN2/FCGR2B/IGHV2-70/IGHG4/IGHA1/RAC2/IGHG2/IGHV5-51/NCKAP1L/TRBC1/C3/TRBC2/IGHV1-69D/IGHV1-45/IGHV4-59/ITGAM/IGHA2/IGHV3-33/TRDC/IGHV3-53/IGHV4-34/IGHV3-66/IGHV3-38/IGHV6-1/MARCO/IGHV3-13/IGHV4-4/STAP1/IGHD/IGH…
GOBP_RESPONSE_TO_XENOBIOTIC_STIMULUS	GOBP_RESPONSE_TO_XENOBIOTIC_STIMULUS	129	-0.542349	-1.4933	0.0416667	1	1	8694	tags=33%, list=15%, signal=28%	AKR1C1/GGT1/SULT1A2/AADAC/CYP2J2/UGT2B11/CYP2S1/CYP3A5/CYP26A1/CYP2A6/PTGS1/CYP2A7/GLYAT/CYP2C8/GSTM1/GSTA1/LPO/ACY3/HNF4A/GSTA5/SULT1A4/AOC1/GSTA2/FMO3/CYP2A13/UGT1A10/CYP3A7/FMO2/CES1/UGT2B28/CYP3A4/RORC/UGT1A9/UGT1A6/ACSM2B/UGT1A7/UGT2B15/UGT1A8/UGT1A4/UGT1A1/SULT1C3/UGT1A3
GOCC_T_CELL_RECEPTOR_COMPLEX	GOCC_T_CELL_RECEPTOR_COMPLEX	135	-0.571058	-1.59376	0.0416667	1	1	7954	tags=57%, list=14%, signal=49%	TRAV8-6/TRBV7-1/TRGV2/CD247/CD3D/CD4/TRAV12-2/TRAV4/TRBV3-1/TRBV5-3/TRBV5-4/APBB1IP/TRBV2/TRBV9/TRBC1/TRBV14/CD3E/TRBV30/TRAV5/TRAV1-1/TRBV7-9/TRBV29-1/TRBV4-2/TRBC2/TRBV28/SYK/TRAV6/TRGC2/TRGV3/TRAV22/TRBV20-1/TRBV4-1/TRAV38-1/TRAV26-1/TRAV25/TRAV8-3/TRAV23DV6/TRAV13-1/TRBV19/TRDC/TRAT1/TRAV29DV5/SKAP1/TRAV3/TRGV9/TRBJ2-3/TRBV6-1/TRAV21/TRGV10/TRBV5-1/TRBJ2-7/TRAV8-2/TRBV27/TRAV8-4/TRBV11-2/TRAV…
HP_LEFT_VENTRICULAR_HYPERTROPHY	HP_LEFT_VENTRICULAR_HYPERTROPHY	90	-0.508522	-1.30296	0.0416667	1	1	10892	tags=22%, list=19%, signal=18%	SVIL/MT-TC/GNPTAB/KCNJ5/MT-TL1/SCN5A/NEXN/TPK1/PLN/MT-TS2/DTNA/MT-TF/TLL1/MT-TV/MT-TW/MYL2/MT-TQ/MYOZ2/TNNT2/MT-TK
HP_UNUSUAL_INFECTION_BY_ANATOMICAL_SITE	HP_UNUSUAL_INFECTION_BY_ANATOMICAL_SITE	92	-0.486207	-1.27331	0.0416667	1	1	10983	tags=45%, list=19%, signal=36%	IL10/JAK3/IL7/FAS/C4B/CARD9/PIK3R1/RAG1/CD19/NCF2/CTLA4/CD79B/HLA-DRB1/STAT4/BLNK/HLA-DPB1/WAS/PRF1/IL2RG/NCF4/TLR4/IGHM/C4A/NCF1/HLA-DPA1/CCR1/BTK/CYBB/NCKAP1L/CIITA/C8B/SH2D1A/DNASE1L3/CD79A/NLRP3/RAG2/CFB/CD40LG/CR2/TNFRSF13B/SLC6A19
GOBP_SENSORY_PERCEPTION_OF_SMELL	GOBP_SENSORY_PERCEPTION_OF_SMELL	441	0.450864	1.2173	0.0421053	1	1	5694	tags=22%, list=10%, signal=20%	OR6C74/OR6C6/OR10G7/OR6C1/OR6B2/OR5M11/OR5AU1/OR9G1/OR14C36/OR52E6/OR6C2/OR10A7/OR5I1/OR4D6/OR1L1/OR52L1/OR51J1/OR9Q2/OR56A5/OR4N5/OR5K4/OR4K14/OR4K2/OR8B12/OR2A12/OR13C4/OR10A3/OR6S1/OR9G4/OR4K1/OR4L1/OR7C2/OR14A2/OR56B2P/OR2AJ1/OR52A1/OR7D4/OR4F15/OR5M3/OR5H2/OR12D1/OR13C6P/OR7G1/OR1L6/OR6C76/OR4D9/OR2G6/OR1E2/OR4F6/OR56A3/OR5AP2/OR8B8/OR4C45/OR1M1/OR2J3/OR6C75/OR10H5/OR5L1/OR4K5/OR5M9/OR8H3/OR…
GOBP_REGULATION_OF_HISTONE_DEACETYLATION	GOBP_REGULATION_OF_HISTONE_DEACETYLATION	28	0.710383	1.4089	0.0422535	1	1	3302	tags=7%, list=6%, signal=7%	MIR182/SDR16C5
GOBP_REGULATION_OF_HUMORAL_IMMUNE_RESPONSE	GOBP_REGULATION_OF_HUMORAL_IMMUNE_RESPONSE	137	-0.568046	-1.58389	0.0434783	1	1	11914	tags=56%, list=21%, signal=44%	VTN/CR1L/IGLC3/PROS1/SERPING1/IGKV3-15/C1R/CFH/IGLV2-14/C1QB/C1QC/C1QA/C1S/PTPN6/CD5L/C4B/CCR7/IGHV3-11/IGHG1/CD19/IGLV2-11/IGKV1-5/C4BPA/IGKV4-1/IGHG3/IGKV1-16/C3AR1/IGLV3-19/C2/IGLV1-40/IGHV3-48/IGLC2/IGKV3-20/C7/IGHV3-23/VSIG4/IGKC/IGHV3-30/IGLV2-8/IGLV1-47/C4A/IGLV6-57/TNF/FCGR2B/IGHV2-70/IGHG4/IGHG2/C3/IGKV2-28/IGKV1-12/C8B/IGHV4-59/PTPRC/IGHV3-33/IGKV5-2/IGHV3-53/IGLV3-27/IGHV4-34/IGKV3D-20…
HP_INCREASED_CSF_LACTATE	HP_INCREASED_CSF_LACTATE	99	-0.523988	-1.36927	0.0434783	1	1	8950	tags=9%, list=16%, signal=8%	MT-TH/COQ8A/MT-TS2/MT-TF/MT-TV/MT-TN/MT-TW/MT-TQ/MT-TK
GOBP_DNA_CONFORMATION_CHANGE	GOBP_DNA_CONFORMATION_CHANGE	346	0.468262	1.24253	0.0444444	1	1	14106	tags=27%, list=25%, signal=20%	H4C7/H1-1/TNP2/H4C13/TNP1/H2AB3/H3C15/HMGA2/H1-5/H2BC10/H3C11/H2BC7/PIF1/H2BC17/ERCC6L/H2BC14/CENPA/HJURP/KNL1/H3C7/H1-6/H3C12/H3C8/CENPI/POLQ/RAD54L/RAD51/H1-4/NCAPG/H2BC3/BLM/APOBEC1/NCAPH/H2BC8/H2BC11/CDCA5/HELLS/CENPM/PIWIL1/H2BC9/CENPK/CHD5/H3C1/DNA2/TOP2A/PRM3/H3C4/H2BC13/H2BC4/H1-3/H2BC6/RECQL4/BRIP1/H2BW2/CENPP/CENPL/H4C14/CHAF1B/CENPU/CENPN/H4C5/ASF1B/TET1/H4C3/H4C1/H4C8/DDX11L8/H4C4/NCA…
GOBP_MONOSACCHARIDE_BIOSYNTHETIC_PROCESS	GOBP_MONOSACCHARIDE_BIOSYNTHETIC_PROCESS	97	-0.49318	-1.29596	0.0454545	1	1	4426	tags=7%, list=8%, signal=7%	GPD1/RBP4/PPARGC1A/ADIPOQ/G6PC/MIR107/MIR103A1
GOBP_REGULATION_OF_DEACETYLASE_ACTIVITY	GOBP_REGULATION_OF_DEACETYLASE_ACTIVITY	12	0.82501	1.40006	0.0454545	1	1	980	tags=8%, list=2%, signal=8%	MIR182
GOBP_REGIONALIZATION	GOBP_REGIONALIZATION	326	0.477597	1.24976	0.045977	1	1	12422	tags=28%, list=22%, signal=22%	HES3/NEUROD1/ISL1/WNT2/DMRT2/WNT1/SP8/LHX3/NKX2-1/NEUROG1/WT1/GBX2/ROBO2/OTX1/FGF8/SEMA3A/FOXN4/FOXA2/FOXD1/LMX1B/WNT7B/PAX2/NTF4/WNT3A/TBXT/PITX2/HES2/HOXD13/ZIC3/LRP2/MSGN1/DLX2/CDX1/NODAL/HES7/CDX2/FGF10/GSX2/CDX4/SOX1/DMRTA2/TBX20/TBX1/LHX1/GDNF/SIX2/GREM1/WNT8B/TBR1/HELT/GSC/EMX2/HOXC5/VAX2/DLX1/DMRT3/DLL3/FEZF1/TBX18/XRCC2/FOXB1/CER1/ALX4/TP63/HOXB1/HOXC13/EN1/NKX2-2/GLI1/GATA5/HOXC9/EMX1/H…
GOBP_REGULATION_OF_HISTONE_DEACETYLASE_ACTIVITY	GOBP_REGULATION_OF_HISTONE_DEACETYLASE_ACTIVITY	10	0.843842	1.43479	0.0461538	1	1	980	tags=10%, list=2%, signal=10%	MIR182
GOCC_PROTEIN_DNA_COMPLEX	GOCC_PROTEIN_DNA_COMPLEX	204	0.51574	1.27817	0.0470588	1	1	14375	tags=36%, list=25%, signal=27%	H4C7/H1-1/TNP2/H4C13/TNP1/H2AB3/H3C15/H2AC12/MYOG/HMGA2/H2AC4/H1-5/H2BC10/TBX5/H3C11/PAX2/H2BC7/H2BC17/H2BC14/CENPA/H3C7/H1-6/H3C12/H3C8/CDC45/H2AC16/H1-4/H2AC21/H2BC3/H2AC7/H2BC8/H2BC11/NKX2-5/H2BC9/H3C1/GINS4/H2AC17/TERT/PRM3/H3C4/H2BC13/H2BC4/H1-3/H2AC13/H2BC6/GINS1/GINS2/H2BW2/H4C14/H4C5/H4C3/H4C1/HOXA11/H4C8/H4C4/TONSL/H3C10/H2AC11/H2BS1/H2BC19P/H2BC15/MCM5/H3C13/RPA4/H2BC18/MCM2/H4C9/H2AC8/…
GOBP_MITOTIC_SISTER_CHROMATID_SEGREGATION	GOBP_MITOTIC_SISTER_CHROMATID_SEGREGATION	164	0.546162	1.31536	0.047619	1	1	13967	tags=35%, list=25%, signal=26%	UBE2DNL/PTTG3P/SMC1B/KIF14/SGO1/DLGAP5/HASPIN/KIF18B/KIF2C/NUF2/NEK2/AURKB/NCAPG/KIF18A/PLK1/KIF4A/NCAPH/BUB1B/CDC20/SGO2/NDC80/KIFC1/BUB1/TRIP13/CENPF/KIF23/CDCA5/CDCA8/CENPE/CDT1/CENPK/ESPL1/RAD21L1/KIF4B/CDC6/NEK6/TTK/USP44/UBE2C/PSRC1/SPAG5/PRC1/PTTG1/RACGAP1/ZWINT/TACC3/NCAPG2/FBXO5/DSCC1/CCNB1/MAD2L1/GEN1/REC8/KNSTRN/KNTC1/SPDL1/NCAPD3
GOBP_POSITIVE_REGULATION_OF_B_CELL_ACTIVATION	GOBP_POSITIVE_REGULATION_OF_B_CELL_ACTIVATION	139	-0.476084	-1.32739	0.047619	1	1	10660	tags=46%, list=19%, signal=37%	TNFSF13/IL7/MEF2C/IGHV3-21/IGHV3-11/IGHG1/CLCF1/CD74/IGHV3-15/IGHV3-74/IGHV4-28/IGHG3/IGHV3-48/IGLL5/IGLC2/IGHV3-23/IGHV3-72/IGHV3-73/IGHV1-58/CD38/IGKC/CD27/CHRNB2/TBX21/INPP5D/IGHV3-30/CD28/TLR4/GPR183/IGHM/SASH3/IGHV2-70/IGHG4/IGHA1/BTK/IGHG2/IGHV5-51/NCKAP1L/TRBC1/IL2/TRBC2/SYK/IGHV1-69D/IGHV1-45/IGHV4-59/IGHA2/PTPRC/IGHV3-33/TRDC/IGHV3-53/VAV3/IGHV4-34/FCRL3/IGHV3-66/IGHV3-38/IGHV6-1/IGHV3-1…
BLCA
ID	Description	setSize	enrichmentScore	NES	pvalue	p.adjust	qvalues	rank	leading_edge	core_enrichment
GOBP_REGULATION_OF_CELLULAR_AMIDE_METABOLIC_PROCESS	GOBP_REGULATION_OF_CELLULAR_AMIDE_METABOLIC_PROCESS	478	-0.446216	-1.33442	0.0123457	1	1	5900	tags=6%, list=10%, signal=5%	MIR135B/MIR27A/DAZ1/MIR181A2/MIR31/MIR222/MIR299/MIR101-1/MIR16-1/DAZ2/MIR103A1/MIR361/MIR182/MIR107/MIR125B1/MIR28/MIR520E/MIR520C/MIR520B/MIR518B/MIR133B/MIR1-1/MIR346/MIR96/MIR15B/MIR206/MIR100
GOBP_REGULATION_OF_EPITHELIAL_CELL_MIGRATION	GOBP_REGULATION_OF_EPITHELIAL_CELL_MIGRATION	273	-0.494279	-1.41828	0.0125	1	1	7481	tags=7%, list=13%, signal=6%	MIR135B/MIR27A/MIR31/MIR150/MIR222/MIR101-1/MIR2355/MIR16-1/MIR487B/MIR26A1/MIR361/MIR495/MIR30A/MIR640/MIR505/MIR133B/MIR188/MIR15B/MIR206/MIR329-1
GOMF_MRNA_BINDING	GOMF_MRNA_BINDING	485	-0.534247	-1.58608	0.0126582	1	1	7525	tags=17%, list=13%, signal=15%	MIR3909/MIR135B/MIR374B/MIR27A/MIR302D/DAZ1/MIR181A2/MIR34B/MIR31/MIR150/MIR644A/MIR588/MIR147A/MIR194-1/MIR128-1/MIR222/MIR299/MIR1298/MIR185/MIR4686/MIR101-1/MIR2355/MIR582/MIR638/MIR16-1/MIR491/MIR572/MIR487B/MIR506/DAZ2/MIR520H/MIR32/MIR26A1/MIR519B/MIR103A1/MIR519D/MIR1207/MIR361/MIR182/MIR511/MIR30B/MIR876/MIR409/MIR495/MIR107/MIR548C/MIR125B1/MIR374A/MIR301A/MIR1277/MIR518A1/MIR920/MIR30A/…
GOBP_ENDOTHELIAL_CELL_MIGRATION	GOBP_ENDOTHELIAL_CELL_MIGRATION	257	-0.522538	-1.49569	0.0128205	1	1	5226	tags=7%, list=9%, signal=7%	MIR135B/MIR27A/MIR31/MIR150/MIR101-1/MIR2355/MIR16-1/MIR487B/MIR26A1/MIR361/MIR495/MIR30A/MIR640/MIR505/MIR133B/MIR188/MIR15B/MIR206/MIR329-1
GOMF_RNA_BINDING_INVOLVED_IN_POSTTRANSCRIPTIONAL_GENE_SILENCING	GOMF_RNA_BINDING_INVOLVED_IN_POSTTRANSCRIPTIONAL_GENE_SILENCING	192	-0.626106	-1.74753	0.012987	1	1	7654	tags=42%, list=14%, signal=36%	MIR302C/MIR3909/MIR135B/MIR374B/MIR27A/MIR302D/MIR181A2/MIR34B/MIR31/MIR150/MIR644A/MIR588/MIR147A/MIR194-1/MIR128-1/MIR222/MIR299/MIR1298/MIR185/MIR4686/MIR101-1/MIR2355/MIR582/MIR638/MIR16-1/MIR491/MIR572/MIR487B/MIR506/MIR520H/MIR32/MIR26A1/MIR519B/MIR103A1/MIR519D/MIR1207/MIR361/MIR182/MIR511/MIR30B/MIR876/MIR409/MIR495/MIR107/MIR548C/MIR125B1/MIR374A/MIR301A/MIR1277/MIR518A1/MIR920/MIR30A/MI…
GOBP_SPROUTING_ANGIOGENESIS	GOBP_SPROUTING_ANGIOGENESIS	166	-0.590276	-1.62965	0.0135135	1	1	10897	tags=19%, list=19%, signal=15%	SLC39A12/MIR221/MIR27B/MIRLET7F1/MIR132/FOXC2/MIR30C1/MIR10B/MIR483/MIR23A/AGTR1/MIR27A/MIR34B/MIR31/MIR150/MIR222/MIR377/MIR101-1/MIR2355/MIR16-1/MIR487B/MIR26A1/MIR361/MIR30B/MIR495/MIR30E/MIR1-1/MIR188/MIR15B/MIR206/MIR329-1
GOBP_BLOOD_VESSEL_ENDOTHELIAL_CELL_MIGRATION	GOBP_BLOOD_VESSEL_ENDOTHELIAL_CELL_MIGRATION	159	-0.620791	-1.71007	0.0136986	1	1	10624	tags=17%, list=19%, signal=14%	MIR221/MIR27B/MIRLET7F1/MIR132/FOXC2/MIR10B/MIR483/MIR23A/MIR135B/MIR27A/MIR31/MIR150/MIR101-1/MIR2355/MIR16-1/MIR487B/MIR26A1/MIR361/MIR495/MIR30A/MIR640/MIR505/MIR133B/MIR188/MIR15B/MIR206/MIR329-1
GOBP_NEGATIVE_REGULATION_OF_EPITHELIAL_CELL_PROLIFERATION	GOBP_NEGATIVE_REGULATION_OF_EPITHELIAL_CELL_PROLIFERATION	148	-0.557682	-1.53592	0.0138889	1	1	5900	tags=9%, list=10%, signal=8%	MIR222/MIR2355/MIR16-1/MIR487B/MIR26A1/MIR361/MIR30B/MIR495/MIR125B1/MIR30E/MIR133B/MIR15B/MIR329-1
GOBP_POSITIVE_REGULATION_OF_CELLULAR_AMIDE_METABOLIC_PROCESS	GOBP_POSITIVE_REGULATION_OF_CELLULAR_AMIDE_METABOLIC_PROCESS	163	-0.55374	-1.51826	0.0138889	1	1	281	tags=3%, list=0%, signal=3%	MIR16-1/DAZ2/MIR346/MIR15B/MIR206
GOBP_AMYLOID_PRECURSOR_PROTEIN_METABOLIC_PROCESS	GOBP_AMYLOID_PRECURSOR_PROTEIN_METABOLIC_PROCESS	86	-0.680013	-1.7824	0.0149254	1	1	6685	tags=12%, list=12%, signal=10%	MIR31/MIR644A/MIR147A/MIR101-1/MIR361/MIR107/MIR520C/MIR346/MIR15B/MIR206
GOBP_CELL_MIGRATION_INVOLVED_IN_SPROUTING_ANGIOGENESIS	GOBP_CELL_MIGRATION_INVOLVED_IN_SPROUTING_ANGIOGENESIS	83	-0.655557	-1.71956	0.0151515	1	1	10624	tags=25%, list=19%, signal=21%	MIR221/MIR27B/MIRLET7F1/MIR132/FOXC2/MIR10B/MIR483/MIR23A/MIR27A/MIR31/MIR150/MIR101-1/MIR2355/MIR16-1/MIR487B/MIR26A1/MIR361/MIR495/MIR188/MIR206/MIR329-1
GOBP_NEGATIVE_REGULATION_OF_EPITHELIAL_CELL_MIGRATION	GOBP_NEGATIVE_REGULATION_OF_EPITHELIAL_CELL_MIGRATION	100	-0.705719	-1.85243	0.0151515	1	1	5226	tags=13%, list=9%, signal=12%	MIR101-1/MIR2355/MIR16-1/MIR26A1/MIR361/MIR495/MIR640/MIR505/MIR133B/MIR188/MIR15B/MIR206/MIR329-1
GOBP_CARDIAC_MUSCLE_CELL_PROLIFERATION	GOBP_CARDIAC_MUSCLE_CELL_PROLIFERATION	57	-0.680587	-1.69264	0.0153846	1	1	2409	tags=7%, list=4%, signal=7%	MIR548C/MIR1-1/MIR509-1/MIR873
GOBP_POSITIVE_REGULATION_OF_GLYCOPROTEIN_METABOLIC_PROCESS	GOBP_POSITIVE_REGULATION_OF_GLYCOPROTEIN_METABOLIC_PROCESS	27	-0.787378	-1.71477	0.0153846	1	1	281	tags=7%, list=0%, signal=7%	IL33/MIR346
GOMF_MRNA_5_UTR_BINDING	GOMF_MRNA_5_UTR_BINDING	26	-0.796466	-1.72892	0.015625	1	1	281	tags=8%, list=0%, signal=8%	LARP6/MIR346
GOMF_TASTE_RECEPTOR_ACTIVITY	GOMF_TASTE_RECEPTOR_ACTIVITY	26	-0.734324	-1.59402	0.015625	1	1	12175	tags=65%, list=22%, signal=51%	TAS2R31/TAS2R5/TAS2R4/PKD1L3/TAS2R10/TAS2R43/TAS2R1/TAS2R40/TAS2R16/TAS2R46/TAS2R7/TAS2R9/TAS2R50/TAS2R30/TAS2R3/TAS2R13/TAS2R39
GOBP_NEGATIVE_REGULATION_OF_CARDIAC_MUSCLE_TISSUE_GROWTH	GOBP_NEGATIVE_REGULATION_OF_CARDIAC_MUSCLE_TISSUE_GROWTH	30	-0.768182	-1.71137	0.015873	1	1	389	tags=10%, list=1%, signal=10%	MIR199B/MIR1-1/MIR873
GOBP_NEGATIVE_REGULATION_OF_SMOOTH_MUSCLE_CELL_PROLIFERATION	GOBP_NEGATIVE_REGULATION_OF_SMOOTH_MUSCLE_CELL_PROLIFERATION	54	-0.634907	-1.56226	0.015873	1	1	5572	tags=11%, list=10%, signal=10%	MIR1298/MIR185/MIR638/MIR182/MIR1-1/MIR96
GOBP_NEGATIVE_REGULATION_OF_VASCULAR_ASSOCIATED_SMOOTH_MUSCLE_CELL_PROLIFERATION	GOBP_NEGATIVE_REGULATION_OF_VASCULAR_ASSOCIATED_SMOOTH_MUSCLE_CELL_PROLIFERATION	30	-0.743922	-1.65732	0.015873	1	1	5572	tags=20%, list=10%, signal=18%	MIR1298/MIR185/MIR638/MIR182/MIR1-1/MIR96
GOBP_REGULATION_OF_GLYCOPROTEIN_METABOLIC_PROCESS	GOBP_REGULATION_OF_GLYCOPROTEIN_METABOLIC_PROCESS	58	-0.627568	-1.55318	0.015873	1	1	6685	tags=10%, list=12%, signal=9%	MIR31/MIR644A/MIR147A/MIR101-1/MIR520C/MIR346
GOBP_REGULATION_OF_MYOTUBE_DIFFERENTIATION	GOBP_REGULATION_OF_MYOTUBE_DIFFERENTIATION	42	-0.695138	-1.61665	0.015873	1	1	439	tags=10%, list=1%, signal=9%	TRIM72/MIR133B/MIR1-1/MIR206
GOBP_REGULATION_OF_SMOOTH_MUSCLE_CELL_DIFFERENTIATION	GOBP_REGULATION_OF_SMOOTH_MUSCLE_CELL_DIFFERENTIATION	39	-0.758035	-1.74653	0.015873	1	1	4283	tags=15%, list=8%, signal=14%	SHH/MIR26A1/MIR125B1/MIR1-1/MIR15B/MIR100
GOBP_REGULATION_OF_SPROUTING_ANGIOGENESIS	GOBP_REGULATION_OF_SPROUTING_ANGIOGENESIS	54	-0.640098	-1.57503	0.015873	1	1	6824	tags=17%, list=12%, signal=15%	MIR34B/MIR31/MIR377/MIR487B/MIR30B/MIR495/MIR30E/MIR1-1/MIR329-1
GOBP_VASCULAR_ENDOTHELIAL_GROWTH_FACTOR_PRODUCTION	GOBP_VASCULAR_ENDOTHELIAL_GROWTH_FACTOR_PRODUCTION	53	-0.637665	-1.5549	0.015873	1	1	8218	tags=19%, list=15%, signal=16%	MIR134/MIR302D/MIR147A/MIR16-1/MIR520H/MIR361/MIR107/MIR373/MIR520G/MIR15B
GOBP_POSITIVE_REGULATION_OF_AMYLOID_PRECURSOR_PROTEIN_CATABOLIC_PROCESS	GOBP_POSITIVE_REGULATION_OF_AMYLOID_PRECURSOR_PROTEIN_CATABOLIC_PROCESS	25	-0.854124	-1.82345	0.016129	1	1	281	tags=12%, list=0%, signal=12%	LRRTM3/MIR346/MIR206
GOBP_REGULATION_OF_BICELLULAR_TIGHT_JUNCTION_ASSEMBLY	GOBP_REGULATION_OF_BICELLULAR_TIGHT_JUNCTION_ASSEMBLY	25	-0.74757	-1.59597	0.016129	1	1	179	tags=8%, list=0%, signal=8%	IL17A/MIR105-1
GOBP_REGULATION_OF_TRANSLATION_NCRNA_MEDIATED	GOBP_REGULATION_OF_TRANSLATION_NCRNA_MEDIATED	74	-0.633456	-1.60141	0.016129	1	1	7481	tags=31%, list=13%, signal=27%	MIR135B/MIR27A/MIR181A2/MIR31/MIR222/MIR299/MIR101-1/MIR16-1/MIR103A1/MIR182/MIR107/MIR125B1/MIR28/MIR520E/MIR520C/MIR520B/MIR518B/MIR133B/MIR1-1/MIR346/MIR96/MIR15B/MIR100
GOBP_AMYLOID_BETA_METABOLIC_PROCESS	GOBP_AMYLOID_BETA_METABOLIC_PROCESS	63	-0.71215	-1.72659	0.0163934	1	1	281	tags=6%, list=0%, signal=6%	MIR361/MIR346/MIR15B/MIR206
GOBP_AMYLOID_PRECURSOR_PROTEIN_CATABOLIC_PROCESS	GOBP_AMYLOID_PRECURSOR_PROTEIN_CATABOLIC_PROCESS	63	-0.741145	-1.79689	0.0163934	1	1	3924	tags=8%, list=7%, signal=7%	MIR361/MIR107/MIR346/MIR15B/MIR206
GOBP_CELL_ADHESION_MOLECULE_PRODUCTION	GOBP_CELL_ADHESION_MOLECULE_PRODUCTION	23	-0.743104	-1.54741	0.0163934	1	1	5900	tags=43%, list=10%, signal=39%	MIR154/MIR221/MIR27B/MIR222/MIR1298/MIR101-1/MIR506/MIR374A/MIR520C/MIR206
GOBP_NEGATIVE_REGULATION_OF_ENDOTHELIAL_CELL_PROLIFERATION	GOBP_NEGATIVE_REGULATION_OF_ENDOTHELIAL_CELL_PROLIFERATION	64	-0.689599	-1.69027	0.0163934	1	1	5900	tags=19%, list=10%, signal=17%	MIR222/MIR2355/MIR16-1/MIR487B/MIR26A1/MIR361/MIR30B/MIR495/MIR30E/MIR133B/MIR15B/MIR329-1
GOBP_NEGATIVE_REGULATION_OF_ORGAN_GROWTH	GOBP_NEGATIVE_REGULATION_OF_ORGAN_GROWTH	37	-0.739514	-1.69302	0.0163934	1	1	389	tags=8%, list=1%, signal=8%	MIR199B/MIR1-1/MIR873
GOBP_POSITIVE_REGULATION_OF_ALCOHOL_BIOSYNTHETIC_PROCESS	GOBP_POSITIVE_REGULATION_OF_ALCOHOL_BIOSYNTHETIC_PROCESS	23	-0.743421	-1.54807	0.0163934	1	1	3828	tags=17%, list=7%, signal=16%	MIR182/NTSR1/LHCGR/MIR96
GOBP_REGULATION_OF_AMYLOID_PRECURSOR_PROTEIN_CATABOLIC_PROCESS	GOBP_REGULATION_OF_AMYLOID_PRECURSOR_PROTEIN_CATABOLIC_PROCESS	51	-0.754958	-1.80933	0.0163934	1	1	3924	tags=10%, list=7%, signal=9%	MIR361/MIR107/MIR346/MIR15B/MIR206
GOBP_REGULATION_OF_CARDIAC_MUSCLE_CELL_PROLIFERATION	GOBP_REGULATION_OF_CARDIAC_MUSCLE_CELL_PROLIFERATION	48	-0.703828	-1.66499	0.0163934	1	1	2409	tags=8%, list=4%, signal=8%	MIR548C/MIR1-1/MIR509-1/MIR873
GOBP_REGULATION_OF_CHOLESTEROL_BIOSYNTHETIC_PROCESS	GOBP_REGULATION_OF_CHOLESTEROL_BIOSYNTHETIC_PROCESS	48	-0.657061	-1.55436	0.0163934	1	1	5409	tags=10%, list=10%, signal=9%	MIR548P/MIR30C1/MIR185/MIR182/MIR96
GOBP_REGULATION_OF_VASCULAR_ASSOCIATED_SMOOTH_MUSCLE_CELL_DIFFERENTIATION	GOBP_REGULATION_OF_VASCULAR_ASSOCIATED_SMOOTH_MUSCLE_CELL_DIFFERENTIATION	23	-0.831682	-1.73186	0.0163934	1	1	4283	tags=22%, list=8%, signal=20%	MIR26A1/MIR125B1/MIR1-1/MIR15B/MIR100
GOBP_VASCULAR_ENDOTHELIAL_CELL_PROLIFERATION	GOBP_VASCULAR_ENDOTHELIAL_CELL_PROLIFERATION	38	-0.731722	-1.66597	0.0163934	1	1	4627	tags=24%, list=8%, signal=22%	MIR135B/MIR27A/MIR487B/MIR30B/MIR495/MIR30E/MIR133B/MIR15B/MIR329-1
HP_INCREASED_SERUM_PYRUVATE	HP_INCREASED_SERUM_PYRUVATE	52	-0.711477	-1.71256	0.0163934	1	1	342	tags=6%, list=1%, signal=6%	MT-TL1/MT-TI/MT-TK
GOBP_AMYLOID_PRECURSOR_PROTEIN_BIOSYNTHETIC_PROCESS	GOBP_AMYLOID_PRECURSOR_PROTEIN_BIOSYNTHETIC_PROCESS	24	-0.770134	-1.61647	0.0166667	1	1	6685	tags=25%, list=12%, signal=22%	MIR31/MIR644A/MIR147A/MIR101-1/MIR520C/MIR346
GOBP_NEGATIVE_REGULATION_OF_BLOOD_VESSEL_ENDOTHELIAL_CELL_MIGRATION	GOBP_NEGATIVE_REGULATION_OF_BLOOD_VESSEL_ENDOTHELIAL_CELL_MIGRATION	65	-0.756053	-1.8533	0.0166667	1	1	5226	tags=20%, list=9%, signal=18%	MIR101-1/MIR2355/MIR16-1/MIR26A1/MIR361/MIR495/MIR640/MIR505/MIR133B/MIR188/MIR15B/MIR206/MIR329-1
GOBP_NEGATIVE_REGULATION_OF_CELL_MIGRATION_INVOLVED_IN_SPROUTING_ANGIOGENESIS	GOBP_NEGATIVE_REGULATION_OF_CELL_MIGRATION_INVOLVED_IN_SPROUTING_ANGIOGENESIS	34	-0.771494	-1.74103	0.0166667	1	1	5224	tags=24%, list=9%, signal=21%	MIR2355/MIR16-1/MIR26A1/MIR361/MIR495/MIR188/MIR206/MIR329-1
GOBP_REGULATION_OF_CELL_MIGRATION_INVOLVED_IN_SPROUTING_ANGIOGENESIS	GOBP_REGULATION_OF_CELL_MIGRATION_INVOLVED_IN_SPROUTING_ANGIOGENESIS	67	-0.675824	-1.68764	0.0166667	1	1	10624	tags=31%, list=19%, signal=25%	MIR221/MIR27B/MIRLET7F1/MIR132/FOXC2/MIR10B/MIR483/MIR23A/MIR27A/MIR31/MIR150/MIR101-1/MIR2355/MIR16-1/MIR487B/MIR26A1/MIR361/MIR495/MIR188/MIR206/MIR329-1
GOBP_SMOOTH_MUSCLE_CELL_DIFFERENTIATION	GOBP_SMOOTH_MUSCLE_CELL_DIFFERENTIATION	65	-0.676739	-1.65888	0.0166667	1	1	2143	tags=8%, list=4%, signal=7%	MIR26A1/MIR125B1/MIR1-1/MIR15B/MIR100
GOBP_VASCULAR_ASSOCIATED_SMOOTH_MUSCLE_CELL_DIFFERENTIATION	GOBP_VASCULAR_ASSOCIATED_SMOOTH_MUSCLE_CELL_DIFFERENTIATION	34	-0.791809	-1.78687	0.0166667	1	1	4283	tags=15%, list=8%, signal=14%	MIR26A1/MIR125B1/MIR1-1/MIR15B/MIR100
GOBP_POSITIVE_REGULATION_OF_AMYLOID_BETA_FORMATION	GOBP_POSITIVE_REGULATION_OF_AMYLOID_BETA_FORMATION	20	-0.874832	-1.77224	0.0169492	1	1	281	tags=15%, list=0%, signal=15%	LRRTM3/MIR346/MIR206
GOMF_BITTER_TASTE_RECEPTOR_ACTIVITY	GOMF_BITTER_TASTE_RECEPTOR_ACTIVITY	20	-0.763276	-1.54625	0.0169492	1	1	6980	tags=80%, list=12%, signal=70%	TAS2R31/TAS2R5/TAS2R4/TAS2R10/TAS2R43/TAS2R1/TAS2R40/TAS2R16/TAS2R46/TAS2R7/TAS2R9/TAS2R50/TAS2R30/TAS2R3/TAS2R13/TAS2R39
GOBP_NEGATIVE_REGULATION_OF_CARDIAC_MUSCLE_CELL_PROLIFERATION	GOBP_NEGATIVE_REGULATION_OF_CARDIAC_MUSCLE_CELL_PROLIFERATION	19	-0.815636	-1.63777	0.0172414	1	1	389	tags=16%, list=1%, signal=16%	MIR199B/MIR1-1/MIR873
GOBP_NEGATIVE_REGULATION_OF_VASCULAR_ENDOTHELIAL_CELL_PROLIFERATION	GOBP_NEGATIVE_REGULATION_OF_VASCULAR_ENDOTHELIAL_CELL_PROLIFERATION	19	-0.815919	-1.63834	0.0172414	1	1	4627	tags=37%, list=8%, signal=34%	MIR487B/MIR30B/MIR495/MIR30E/MIR133B/MIR15B/MIR329-1
GOBP_POSITIVE_REGULATION_OF_CELL_AGING	GOBP_POSITIVE_REGULATION_OF_CELL_AGING	17	-0.837819	-1.66973	0.0175439	1	1	918	tags=12%, list=2%, signal=12%	MIR217/MIR188
GOCC_RNAI_EFFECTOR_COMPLEX	GOCC_RNAI_EFFECTOR_COMPLEX	16	-0.848153	-1.66812	0.0175439	1	1	176	tags=12%, list=0%, signal=12%	MIR31/MIR206
GOBP_NEGATIVE_REGULATION_OF_SMOOTH_MUSCLE_CELL_DIFFERENTIATION	GOBP_NEGATIVE_REGULATION_OF_SMOOTH_MUSCLE_CELL_DIFFERENTIATION	21	-0.783426	-1.55513	0.0178571	1	1	185	tags=24%, list=0%, signal=24%	MIR199B/SHH/MIR26A1/MIR15B/MIR100
GOBP_LIPID_DIGESTION	GOBP_LIPID_DIGESTION	21	0.688535	1.58319	0.0217391	1	1	10382	tags=38%, list=18%, signal=31%	PNLIP/PNLIPRP2/APOA4/SOAT2/ABCG8/CLPS/CEL/APOA5
GOBP_REGULATION_OF_CELL_GROWTH_INVOLVED_IN_CARDIAC_MUSCLE_CELL_DEVELOPMENT	GOBP_REGULATION_OF_CELL_GROWTH_INVOLVED_IN_CARDIAC_MUSCLE_CELL_DEVELOPMENT	21	0.695121	1.59833	0.0217391	1	1	343	tags=5%, list=1%, signal=5%	MIR208A
GOBP_REGULATION_OF_CIRCADIAN_SLEEP_WAKE_CYCLE	GOBP_REGULATION_OF_CIRCADIAN_SLEEP_WAKE_CYCLE	21	0.741957	1.70603	0.0217391	1	1	5680	tags=29%, list=10%, signal=26%	NPS/GHRH/NPY2R/CHRNB2/DRD3/NMU
HP_STUTTERING	HP_STUTTERING	18	0.792153	1.79635	0.0217391	1	1	43	tags=6%, list=0%, signal=6%	MT-TQ
GOBP_CRANIOFACIAL_SUTURE_MORPHOGENESIS	GOBP_CRANIOFACIAL_SUTURE_MORPHOGENESIS	17	0.776821	1.71053	0.0222222	1	1	1319	tags=12%, list=2%, signal=11%	NEUROG1/FGF4
GOBP_POSITIVE_REGULATION_OF_CELL_GROWTH_INVOLVED_IN_CARDIAC_MUSCLE_CELL_DEVELOPMENT	GOBP_POSITIVE_REGULATION_OF_CELL_GROWTH_INVOLVED_IN_CARDIAC_MUSCLE_CELL_DEVELOPMENT	10	0.852474	1.70577	0.0222222	1	1	343	tags=10%, list=1%, signal=10%	MIR208A
GOBP_POSITIVE_REGULATION_OF_CIRCADIAN_RHYTHM	GOBP_POSITIVE_REGULATION_OF_CIRCADIAN_RHYTHM	17	0.772448	1.7009	0.0222222	1	1	4084	tags=18%, list=7%, signal=16%	NPS/GHRH/NPY2R
GOBP_VENTRAL_SPINAL_CORD_INTERNEURON_DIFFERENTIATION	GOBP_VENTRAL_SPINAL_CORD_INTERNEURON_DIFFERENTIATION	13	0.861617	1.81817	0.0222222	1	1	3359	tags=46%, list=6%, signal=43%	LHX3/SOX1/FOXN4/ASCL1/DBX1/NKX2-2
GOCC_KINOCILIUM	GOCC_KINOCILIUM	10	0.886113	1.77308	0.0222222	1	1	2664	tags=20%, list=5%, signal=19%	GRXCR1/KNCN
GOMF_OLIGOSACCHARIDE_BINDING	GOMF_OLIGOSACCHARIDE_BINDING	16	0.800878	1.73872	0.0222222	1	1	6417	tags=38%, list=11%, signal=33%	REG1B/LGALS16/REG3G/REG3A/ITLN1/REG1A
GOBP_DNA_METHYLATION_INVOLVED_IN_GAMETE_GENERATION	GOBP_DNA_METHYLATION_INVOLVED_IN_GAMETE_GENERATION	19	0.762486	1.7304	0.0227273	1	1	8673	tags=53%, list=15%, signal=45%	DNMT3L/CTCFL/TDRD1/MAEL/DDX4/ASZ1/TDRD9/PIWIL2/TDRD12/TDRKH
GOBP_DORSAL_SPINAL_CORD_DEVELOPMENT	GOBP_DORSAL_SPINAL_CORD_DEVELOPMENT	19	0.752432	1.70758	0.0227273	1	1	3280	tags=32%, list=6%, signal=30%	UNCX/LHX3/GSX2/ASCL1/DRGX/GSX1
GOBP_SNRNA_PROCESSING	GOBP_SNRNA_PROCESSING	36	0.633286	1.51283	0.0227273	1	1	8927	tags=14%, list=16%, signal=12%	CT45A9/SAGE2P/CT45A1/CT45A10/SAGE1
HP_DISTAL_PERIPHERAL_SENSORY_NEUROPATHY	HP_DISTAL_PERIPHERAL_SENSORY_NEUROPATHY	19	0.785271	1.78211	0.0227273	1	1	43	tags=5%, list=0%, signal=5%	MT-TQ
HP_WIDENED_CEREBRAL_SUBARACHNOID_SPACE	HP_WIDENED_CEREBRAL_SUBARACHNOID_SPACE	14	0.80415	1.72429	0.0227273	1	1	43	tags=7%, list=0%, signal=7%	MT-TQ
GOBP_BRAIN_MORPHOGENESIS	GOBP_BRAIN_MORPHOGENESIS	35	0.617197	1.48522	0.0232558	1	1	11484	tags=31%, list=20%, signal=25%	GSX2/PAX2/CTNNA2/SLC4A10/FGF8/OTX1/SLIT1/FANCC/SPEF2/HESX1/FANCD2
GOBP_POSITIVE_REGULATION_OF_HISTONE_METHYLATION	GOBP_POSITIVE_REGULATION_OF_HISTONE_METHYLATION	35	0.586231	1.41071	0.0232558	1	1	11308	tags=23%, list=20%, signal=18%	GCG/PRDM9/MYB/PHF19/PRDM12/BRCA1/TET1/DNMT3B
GOCC_ENDOSOME_LUMEN	GOCC_ENDOSOME_LUMEN	35	0.682045	1.64127	0.0232558	1	1	7791	tags=23%, list=14%, signal=20%	CSH1/SFTPC/PGA4/PRLR/INS/GH2/PRL/LRP2
GOMF_PROTEIN_DISULFIDE_OXIDOREDUCTASE_ACTIVITY	GOMF_PROTEIN_DISULFIDE_OXIDOREDUCTASE_ACTIVITY	20	0.759548	1.72373	0.0232558	1	1	684	tags=5%, list=1%, signal=5%	GRXCR1
HP_CLONIC_SEIZURE	HP_CLONIC_SEIZURE	35	0.636984	1.53284	0.0232558	1	1	9093	tags=29%, list=16%, signal=24%	GABRA1/GRIN2A/NEUROD2/KCNA1/SCN1A/KCNQ2/GRIA2/SCN8A/FRRS1L/SCN2A
HP_FLUCTUATIONS_IN_CONSCIOUSNESS	HP_FLUCTUATIONS_IN_CONSCIOUSNESS	22	0.758061	1.73431	0.0232558	1	1	43	tags=5%, list=0%, signal=5%	MT-TQ
HP_IMPAIRED_VISUOSPATIAL_CONSTRUCTIVE_COGNITION	HP_IMPAIRED_VISUOSPATIAL_CONSTRUCTIVE_COGNITION	35	0.702786	1.69118	0.0232558	1	1	1142	tags=6%, list=2%, signal=6%	MT-TQ/GABRA1
HP_NEONATAL_INSULIN_DEPENDENT_DIABETES_MELLITUS	HP_NEONATAL_INSULIN_DEPENDENT_DIABETES_MELLITUS	20	0.759791	1.72428	0.0232558	1	1	10762	tags=55%, list=19%, signal=45%	NEUROD1/PAX4/HNF1A/INS/KCNJ11/PTF1A/PDX1/ZFP57/HNF4A/CEL/ABCC8
GOBP_CELL_FATE_COMMITMENT_INVOLVED_IN_PATTERN_SPECIFICATION	GOBP_CELL_FATE_COMMITMENT_INVOLVED_IN_PATTERN_SPECIFICATION	11	0.870858	1.71159	0.0238095	1	1	3359	tags=55%, list=6%, signal=51%	LHX3/SOX1/FOXN4/ASCL1/DBX1/NKX2-2
GOBP_REGULATION_OF_BEHAVIOR	GOBP_REGULATION_OF_BEHAVIOR	65	0.576763	1.63765	0.0238095	1	1	9300	tags=25%, list=16%, signal=21%	NPS/GHRH/HTR1A/TRH/INS/NPY2R/CHRNB2/HTR1D/MC4R/DRD3/NMU/CNTNAP4/CNR1/GHSR/NLGN1/RELN
GOCC_REPLICATION_FORK	GOCC_REPLICATION_FORK	65	0.557375	1.5826	0.0238095	1	1	19443	tags=62%, list=34%, signal=40%	MCM10/XRCC2/PRIM1/PIF1/WDHD1/MMS22L/RFC4/UHRF1/RAD18/BLM/DONSON/PRIM2/RPA3/RAD51C/TIPIN/RFC3/POLA1/POLA2/XRCC3/TIMELESS/TONSL/POLD1/RFC5/POLD3/RAD51D/PCNA/RFC2/MCM3/H2AX/RFC1/HMCES/RPA1/RPA2/POLD2/PRIMPOL/CDC5L/RAD51B/MRE11/ZMIZ2/BCAS2
GOMF_CARBOXY_LYASE_ACTIVITY	GOMF_CARBOXY_LYASE_ACTIVITY	34	0.70159	1.63046	0.0238095	1	1	6729	tags=21%, list=12%, signal=18%	GAD2/DDC/PCK1/URAD/GADL1/GAD1/ACOD1
GOMF_LIPOPOLYSACCHARIDE_BINDING	GOMF_LIPOPOLYSACCHARIDE_BINDING	32	0.649479	1.55116	0.0238095	1	1	707	tags=6%, list=1%, signal=6%	DEFB114/DEFB106A
GOMF_MIRNA_BINDING	GOMF_MIRNA_BINDING	32	0.666436	1.59166	0.0238095	1	1	1791	tags=6%, list=3%, signal=6%	LIN28A/TRIM71
GOMF_TRANSLATION_INITIATION_FACTOR_BINDING	GOMF_TRANSLATION_INITIATION_FACTOR_BINDING	32	0.681214	1.62695	0.0238095	1	1	3005	tags=6%, list=5%, signal=6%	LIN28A/OTX2
HP_ABNORMAL_C_PEPTIDE_LEVEL	HP_ABNORMAL_C_PEPTIDE_LEVEL	24	0.712634	1.65681	0.0238095	1	1	10762	tags=38%, list=19%, signal=30%	NEUROD1/PAX4/HNF1A/INS/KCNJ11/PDX1/HNF4A/CEL/ABCC8
HP_ABNORMALITY_OF_ABDOMINAL_SITUS	HP_ABNORMALITY_OF_ABDOMINAL_SITUS	11	0.833509	1.63819	0.0238095	1	1	1932	tags=18%, list=3%, signal=18%	ZIC3/CFC1
HP_ABNORMALITY_OF_THE_PREPUTIUM	HP_ABNORMALITY_OF_THE_PREPUTIUM	32	0.613995	1.46641	0.0238095	1	1	14991	tags=59%, list=27%, signal=44%	BRIP1/FANCA/XRCC2/FANCB/FANCC/RAD51/BRCA1/FANCE/FANCI/FANCD2/UBE2T/BRCA2/RAD51C/FANCG/ERCC4/MAD2L2/PALB2/FANCM/RFWD3
HP_LATE_ONSET	HP_LATE_ONSET	32	0.625483	1.49385	0.0238095	1	1	11547	tags=31%, list=20%, signal=25%	NEUROD1/PAX4/HNF1A/KCNJ11/PDX1/PPP1R3A/HNF4A/ABCC8/IGF2BP2/SLC30A8
HP_RECURRENT_PAROXYSMAL_HEADACHE	HP_RECURRENT_PAROXYSMAL_HEADACHE	32	0.739911	1.76714	0.0238095	1	1	43	tags=3%, list=0%, signal=3%	MT-TQ
GOBP_CELL_AGGREGATION	GOBP_CELL_AGGREGATION	23	0.724437	1.64307	0.0243902	1	1	4987	tags=22%, list=9%, signal=20%	UNCX/FGF4/OTOR/COL2A1/MYF5
GOBP_CELL_CYCLE_DNA_REPLICATION	GOBP_CELL_CYCLE_DNA_REPLICATION	64	0.621489	1.74022	0.0243902	1	1	17004	tags=70%, list=30%, signal=49%	AICDA/E2F7/POLE2/PRIM1/CDT1/CDC7/GINS1/CDC45/MCM2/RAD51/FBXO5/RFC4/E2F8/DNA2/DONSON/GINS3/DBF4B/FEN1/POLE/PRIM2/RPA3/BRCA2/TIPIN/RFC3/POLA1/POLA2/MCM6/MCM5/DBF4/GMNN/POLD1/RFC5/POLD3/MCM4/PCNA/RFC2/MCM7/LIG1/MCM3/CHEK2/POLE3/SENP2/RFC1/RPA1/RPA2
GOBP_CELL_DIFFERENTIATION_IN_SPINAL_CORD	GOBP_CELL_DIFFERENTIATION_IN_SPINAL_CORD	49	0.613351	1.55862	0.0243902	1	1	7407	tags=27%, list=13%, signal=23%	LHX3/GSX2/OLIG3/SOX1/FOXN4/ASCL1/DBX1/GSX1/NKX2-2/GBX1/PHOX2A/DRAXIN/MNX1
GOBP_CHROMOSOME_ORGANIZATION_INVOLVED_IN_MEIOTIC_CELL_CYCLE	GOBP_CHROMOSOME_ORGANIZATION_INVOLVED_IN_MEIOTIC_CELL_CYCLE	64	0.574726	1.60928	0.0243902	1	1	13008	tags=48%, list=23%, signal=37%	SYCP1/MAEL/TEX15/DMC1/PRDM9/SPO11/HORMAD2/STAG3/CCNE2/SYCE2/BRIP1/SGO1/MEIKIN/SPATA22/SYCP2/MEI4/MAJIN/RAD21L1/MEIOC/TRIP13/RAD51/BUB1B/CCNE1/BUB1/SMC2/MEIOB/SGO2/FANCD2/RAD51C/INCENP/NCAPD3
GOBP_DNA_METHYLATION	GOBP_DNA_METHYLATION	72	0.607408	1.70882	0.0243902	1	1	14118	tags=42%, list=25%, signal=31%	DNMT3L/CTCFL/DPPA3/H1-8/TDRD1/MAEL/DDX4/TEX15/ASZ1/PRDM14/TDRD9/PIWIL2/TDRD12/TDRKH/EZH2/ZFP57/CYP1A1/BRCA1/HELLS/WT1/DNMT3B/FKBP6/STPG4/BEND3/METTL4/PLD6/DNMT1/PPM1D/PIWIL4/MIS18A
GOBP_DNA_TEMPLATED_TRANSCRIPTION_TERMINATION	GOBP_DNA_TEMPLATED_TRANSCRIPTION_TERMINATION	72	0.506093	1.42379	0.0243902	1	1	24092	tags=76%, list=43%, signal=44%	GTF2H4/POLR2F/TTF1/CSTF2/CPSF4/TTF2/MAZ/ZNF473/SLBP/NCBP1/CPSF3/POLR3K/SMN2/TAF1B/FIP1L1/CLP1/SNRPB/SNRPG/NUDT21/MNAT1/SSU72/PRMT5/POLR1E/POLR2H/POLR2K/CPSF1/CPSF2/SNRPF/SNRPE/ERCC3/CSTF3/CSTF1/TBP/SNRPD3/ERCC2/DHX9/CPSF7/GTF2H2/SCAF4/SMN1/GTF2H3/MTERF1/TAF1A/POLR1C/UBTF/MED18/WDR33/NCBP2/SETX/XRN2/PABPN1/PAPOLA/LSM10/POLR2L/ZMPSTE24
GOBP_METAPHASE_ANAPHASE_TRANSITION_OF_CELL_CYCLE	GOBP_METAPHASE_ANAPHASE_TRANSITION_OF_CELL_CYCLE	64	0.57099	1.59882	0.0243902	1	1	14509	tags=45%, list=26%, signal=34%	UBE2DNL/MOS/ESPL1/NDC80/CDT1/USP44/MAD2L1/TTK/PLK1/TRIP13/CDC6/FBXO5/KNTC1/CENPF/DLGAP5/BUB1B/AURKB/BUB1/CENPE/ZWINT/CDC20/UBE2C/XRCC3/CDK5RAP2/GEN1/MAD2L2/TACC3/CCNB1/SPDL1
GOBP_METAPHASE_PLATE_CONGRESSION	GOBP_METAPHASE_PLATE_CONGRESSION	64	0.548398	1.53556	0.0243902	1	1	16536	tags=42%, list=29%, signal=30%	KIF2B/KIF18A/NUF2/NDC80/CDT1/CDCA5/MEIOC/KIFC1/CENPF/PSRC1/KIF14/KIF2C/AURKB/CDCA8/SPAG5/CENPE/FAM83D/CENPQ/INCENP/KIF22/CCNB1/SPDL1/SPICE1/SEH1L/CHAMP1/ZW10/MAD1L1
GOBP_NCRNA_3_END_PROCESSING	GOBP_NCRNA_3_END_PROCESSING	50	0.563118	1.45184	0.0243902	1	1	19663	tags=46%, list=35%, signal=30%	CT45A9/SAGE2P/CT45A1/CT45A10/SAGE1/EXOSC2/EXOSC3/CT45A3/EXOSC9/ERI2/ELAC1/INTS7/POLR3K/TUT1/DKC1/EXOSC5/INTS2/ERI3/EXOSC10/EXOSC8/PARN/TOE1/INTS12
GOBP_NEGATIVE_REGULATION_OF_MAP_KINASE_ACTIVITY	GOBP_NEGATIVE_REGULATION_OF_MAP_KINASE_ACTIVITY	75	0.511161	1.44935	0.0243902	1	1	2250	tags=3%, list=4%, signal=3%	DEFB114/MIR218-1
GOBP_NEURAL_RETINA_DEVELOPMENT	GOBP_NEURAL_RETINA_DEVELOPMENT	70	0.51169	1.43348	0.0243902	1	1	11353	tags=26%, list=20%, signal=21%	NEUROD1/POU4F2/HCN1/FOXN4/NEUROD4/SLC17A8/PROM1/ATOH7/DSCAM/PTF1A/USH1C/CRB1/DLX2/SIX3/PTN/LHX1/RPGRIP1/IHH
GOBP_SEROTONIN_RECEPTOR_SIGNALING_PATHWAY	GOBP_SEROTONIN_RECEPTOR_SIGNALING_PATHWAY	38	0.671399	1.61393	0.0243902	1	1	6513	tags=39%, list=12%, signal=35%	OR10H3/OR10H4/HTR5A/OR10J5/HTR1A/HTR3B/HTR3A/HRH3/OR10H5/OR10J6P/HTR1D/OR10H2/CHRM4/HTR6/OR5T2
GOBP_VESICLE_CYTOSKELETAL_TRAFFICKING	GOBP_VESICLE_CYTOSKELETAL_TRAFFICKING	72	0.510402	1.43592	0.0243902	1	1	16575	tags=32%, list=29%, signal=23%	SYT4/KIF1A/CNIH2/MYO1A/MYO1H/F8A3/MYO5C/F8A2/MYO7A/HAP1/AP3B2/NDE1/F8A1/MYO15A/MYO19/MYO7B/MYO5B/BICDL1/TRIM46/BLOC1S5/DTNBP1/MAP2/KIFAP3
GOCC_TRANSCRIPTIONALLY_ACTIVE_CHROMATIN	GOCC_TRANSCRIPTIONALLY_ACTIVE_CHROMATIN	23	0.764468	1.73386	0.0243902	1	1	3060	tags=13%, list=5%, signal=12%	H2AB2/H2AB3/H2AB1
GOMF_CARBON_CARBON_LYASE_ACTIVITY	GOMF_CARBON_CARBON_LYASE_ACTIVITY	50	0.585614	1.50983	0.0243902	1	1	6729	tags=14%, list=12%, signal=12%	GAD2/DDC/PCK1/URAD/GADL1/GAD1/ACOD1
GOMF_DNA_DEPENDENT_ATPASE_ACTIVITY	GOMF_DNA_DEPENDENT_ATPASE_ACTIVITY	51	0.590089	1.52808	0.0243902	1	1	16545	tags=51%, list=29%, signal=36%	DMC1/SPO11/RAD54L/XRCC2/DSCC1/RAD51/ERCC6L/RFC4/BLM/MSH5/RAD51C/RFC3/TOP2A/XRCC3/MSH2/CHTF18/MSH6/RFC5/DDX11/MSH4/RAD51D/RFC2/RAD54B/HLTF/TTF2/RFC1
GOMF_G_PROTEIN_COUPLED_AMINE_RECEPTOR_ACTIVITY	GOMF_G_PROTEIN_COUPLED_AMINE_RECEPTOR_ACTIVITY	50	0.577408	1.48868	0.0243902	1	1	7496	tags=36%, list=13%, signal=31%	OR10H3/OR10H4/HTR5A/OR10J5/HTR1A/TAAR3P/TAAR6/HRH3/OR10H5/OR10J6P/HTR1D/OR10H2/CHRM4/TAAR1/HTR6/OR5T2/TAAR9/CHRM5
HP_ABNORMAL_BRAIN_LACTATE_LEVEL_BY_MRS	HP_ABNORMAL_BRAIN_LACTATE_LEVEL_BY_MRS	23	0.760343	1.72451	0.0243902	1	1	43	tags=4%, list=0%, signal=4%	MT-TQ
HP_ABNORMAL_CSF_PROTEIN_LEVEL	HP_ABNORMAL_CSF_PROTEIN_LEVEL	52	0.58769	1.5259	0.0243902	1	1	43	tags=2%, list=0%, signal=2%	MT-TQ
HP_ABNORMAL_METABOLIC_BRAIN_IMAGING_BY_MRS	HP_ABNORMAL_METABOLIC_BRAIN_IMAGING_BY_MRS	37	0.653649	1.52674	0.0243902	1	1	43	tags=3%, list=0%, signal=3%	MT-TQ
HP_FOCAL_SEGMENTAL_GLOMERULOSCLEROSIS	HP_FOCAL_SEGMENTAL_GLOMERULOSCLEROSIS	51	0.595468	1.54201	0.0243902	1	1	2004	tags=4%, list=4%, signal=4%	MT-TQ/PAX2
HP_GLOBAL_BRAIN_ATROPHY	HP_GLOBAL_BRAIN_ATROPHY	49	0.594106	1.50972	0.0243902	1	1	3998	tags=8%, list=7%, signal=8%	GABRA1/ACTL6B/UNC80/SCN1A
HP_INSULIN_RESISTANT_DIABETES_MELLITUS	HP_INSULIN_RESISTANT_DIABETES_MELLITUS	37	0.648692	1.51516	0.0243902	1	1	10762	tags=30%, list=19%, signal=24%	NEUROD1/PAX4/HNF1A/INS/KCNJ11/PTF1A/PDX1/ZFP57/HNF4A/CEL/ABCC8
HP_KETOSIS	HP_KETOSIS	51	0.592006	1.53305	0.0243902	1	1	10762	tags=22%, list=19%, signal=17%	SHOX/PAX4/HNF1A/INS/KCNJ11/CA5A/GHSR/ZFP57/HNF4A/OXCT1/ABCC8
HP_OPTIC_NERVE_HYPOPLASIA	HP_OPTIC_NERVE_HYPOPLASIA	70	0.553206	1.54979	0.0243902	1	1	16885	tags=46%, list=30%, signal=32%	LHX3/PROKR2/OTX2/FOXA2/PTF1A/PROP1/SCN8A/PAX6/ZIC1/FOXE3/SOX2/CENPF/WT1/KIF14/HESX1/FANCI/KNSTRN/WNT3/SOX3/NDE1/CDON/TUBB3/GRIA4/POMT1/RTTN/GPR161/TUBA8/POU1F1/DNMT3A/STAG2/LHX4/ATAD3A
HP_PERSONALITY_CHANGES	HP_PERSONALITY_CHANGES	50	0.625695	1.61317	0.0243902	1	1	43	tags=2%, list=0%, signal=2%	MT-TQ
HP_TYPE_I_DIABETES_MELLITUS	HP_TYPE_I_DIABETES_MELLITUS	52	0.628549	1.63199	0.0243902	1	1	4815	tags=12%, list=9%, signal=11%	MT-TQ/NEUROG3/HNF1A/AIRE/INS/KCNJ11
GOBP_REGULATION_OF_ENDOTHELIAL_CELL_MIGRATION	GOBP_REGULATION_OF_ENDOTHELIAL_CELL_MIGRATION	211	-0.550995	-1.55677	0.0246914	1	1	5226	tags=9%, list=9%, signal=8%	MIR135B/MIR27A/MIR31/MIR150/MIR101-1/MIR2355/MIR16-1/MIR487B/MIR26A1/MIR361/MIR495/MIR30A/MIR640/MIR505/MIR133B/MIR188/MIR15B/MIR206/MIR329-1
GOBP_ALTERNATIVE_MRNA_SPLICING_VIA_SPLICEOSOME	GOBP_ALTERNATIVE_MRNA_SPLICING_VIA_SPLICEOSOME	73	0.554127	1.55691	0.025	1	1	5445	tags=10%, list=10%, signal=9%	RBMY1F/CELF3/CELF4/KHDRBS2/RBMY1A1/SRRM4/RBFOX1
GOBP_CELLULAR_RESPONSE_TO_GROWTH_HORMONE_STIMULUS	GOBP_CELLULAR_RESPONSE_TO_GROWTH_HORMONE_STIMULUS	25	0.731126	1.67851	0.025	1	1	7414	tags=24%, list=13%, signal=21%	CSH1/CSH2/PRLR/CSHL1/GH2/PRL
GOBP_CENTROSOME_DUPLICATION	GOBP_CENTROSOME_DUPLICATION	71	0.507301	1.42039	0.025	1	1	21475	tags=66%, list=38%, signal=41%	CETN1/DEUP1/WDR62/NDC80/STIL/PLK4/BRCA1/C10orf90/CEP72/SASS6/CCNF/BRCA2/CEP76/CEP152/SAC3D1/XRCC3/CDK2/NDE1/CCP110/CENPJ/CDK5RAP2/CEP131/GEN1/RAB6C/RTTN/SPICE1/ALMS1/TRIM37/MDM1/NUBP1/BRSK1/CEP192/C2CD3/CEP295/CKAP5/NUP62/CETN2/CEP135/FBXW5/CNTROB/RBM14/CHMP5/KAT2B/CHMP1B/CHMP4B/CEP63/NAT10
GOBP_GENETIC_IMPRINTING	GOBP_GENETIC_IMPRINTING	25	0.714116	1.63946	0.025	1	1	1914	tags=12%, list=3%, signal=12%	DNMT3L/CTCFL/DPPA3
GOBP_HIPPOCAMPUS_DEVELOPMENT	GOBP_HIPPOCAMPUS_DEVELOPMENT	73	0.549172	1.54299	0.025	1	1	13188	tags=29%, list=23%, signal=22%	NEUROD6/NEUROD1/SLC32A1/HTR5A/FEZF2/KCNA1/NR2E1/CDK5R2/CDK5R1/ANXA3/EZH2/DLX2/RELN/NKX2-1/KIF14/PROX1/HSD3B1/HSD3B2/DAB1/SRD5A1/WNT3A
GOBP_NERVE_DEVELOPMENT	GOBP_NERVE_DEVELOPMENT	69	0.557448	1.55284	0.025	1	1	8096	tags=20%, list=14%, signal=17%	NEUROG1/GABRA5/PAX2/DRGX/GABRB2/NKX2-2/PHOX2B/ATOH7/CHRNB2/POU4F1/PHOX2A/RNF165/NRTN/POU4F3
GOBP_PANCREAS_DEVELOPMENT	GOBP_PANCREAS_DEVELOPMENT	73	0.535655	1.50501	0.025	1	1	11693	tags=30%, list=21%, signal=24%	ZIC3/NEUROD1/INSM1/PAX4/NEUROG3/NKX2-2/HNF1A/FOXA2/PTF1A/PDX1/ONECUT2/ILDR2/PAX6/MNX1/ISL1/HNF4A/DNAAF1/CELA1/PROX1/IHH/ONECUT1/NKX6-1
GOBP_POSITIVE_REGULATION_OF_INSULIN_SECRETION	GOBP_POSITIVE_REGULATION_OF_INSULIN_SECRETION	71	0.499775	1.39931	0.025	1	1	14191	tags=27%, list=25%, signal=20%	GCG/TRH/UCN3/NR0B2/FFAR1/PDX1/CASR/ADCY8/ISL1/CFTR/CLTRN/OXCT1/SLC30A8/NKX6-1/NR1H4/GIP/RFX6/GCK/RBP4
GOBP_REGULATION_OF_CHROMOSOME_SEPARATION	GOBP_REGULATION_OF_CHROMOSOME_SEPARATION	71	0.560905	1.57047	0.025	1	1	14509	tags=42%, list=26%, signal=31%	UBE2DNL/MOS/ESPL1/NDC80/CDT1/USP44/MAD2L1/TTK/PLK1/TRIP13/CDC6/FBXO5/KNTC1/CENPF/DLGAP5/BUB1B/AURKB/BUB1/CENPE/ZWINT/CDC20/UBE2C/XRCC3/PTTG1/CDK5RAP2/GEN1/MAD2L2/TACC3/CCNB1/SPDL1
GOBP_REGULATION_OF_LIPOPOLYSACCHARIDE_MEDIATED_SIGNALING_PATHWAY	GOBP_REGULATION_OF_LIPOPOLYSACCHARIDE_MEDIATED_SIGNALING_PATHWAY	25	0.703918	1.61605	0.025	1	1	218	tags=4%, list=0%, signal=4%	DEFB114
GOCC_HISTONE_METHYLTRANSFERASE_COMPLEX	GOCC_HISTONE_METHYLTRANSFERASE_COMPLEX	68	0.53776	1.49757	0.025	1	1	20372	tags=57%, list=36%, signal=37%	DNMT3L/DYDC1/DYDC2/EZH2/PHF19/HDAC9/PAGR1/CBX5/TRIM37/SUZ12/PAXIP1/RUVBL1/WDR5/RBBP7/WDR5B/DPY30/E2F6/MTF2/TAF6/PELP1/RBBP4/TAF4/KAT8/SENP3/HDAC2/TEX10/NCOA6/LAS1L/JARID2/HCFC1/CXXC1/EED/SETD1A/KDM6A/PRMT5/RBBP5/ASH2L/PHF20/INO80C
GOCC_SPINDLE_MICROTUBULE	GOCC_SPINDLE_MICROTUBULE	71	0.511257	1.43146	0.025	1	1	18201	tags=51%, list=32%, signal=34%	BOD1L2/BIRC8/FAM161A/KIF18A/KIF18B/SKA1/PLK1/SKA3/KIF4A/KNTC1/PSRC1/AURKB/BIRC5/PRC1/CAPN6/CENPE/AURKA/KIF11/HAUS5/HAUS7/CDK1/HAUS8/HAUS6/HAUS1/TUBGCP3/SKA2/CCSAP/HAUS4/ZW10/KIFAP3/TUBG1/POLB/CEP295/ARL3/KLHL22/HAUS2
GOMF_DNA_HELICASE_ACTIVITY	GOMF_DNA_HELICASE_ACTIVITY	74	0.526429	1.48539	0.025	1	1	15943	tags=43%, list=28%, signal=31%	DDX11L8/BRIP1/RAD54L/POLQ/PIF1/MCM2/DSCC1/RAD51/ERCC6L/RFC4/MCM8/BLM/DNA2/CHD5/DDX12P/RECQL4/RFC3/MCM6/CHTF18/NAV2/MCM5/HFM1/RFC5/MCM4/DDX11/RFC2/MCM7/SMC6/FANCM/MCM3/RAD54B/RUVBL1
GOMF_E_BOX_BINDING	GOMF_E_BOX_BINDING	47	0.692812	1.74517	0.025	1	1	5659	tags=21%, list=10%, signal=19%	NEUROG1/NEUROD1/NEUROG2/SCRT2/ASCL1/MYOG/NEUROD2/HES3/MYF5/PTF1A
HP_DILATION_OF_LATERAL_VENTRICLES	HP_DILATION_OF_LATERAL_VENTRICLES	73	0.544666	1.53033	0.025	1	1	10892	tags=18%, list=19%, signal=14%	DCX/CACNG2/MYT1L/KIF1A/CAMK2B/TUBB2B/BRSK2/TNFRSF11A/KCNQ5/ZIC1/EZH2/GRIN1/MED12L
HP_HYPOPLASIA_OF_THE_IRIS	HP_HYPOPLASIA_OF_THE_IRIS	31	0.720204	1.68651	0.025	1	1	20	tags=3%, list=0%, signal=3%	MIR184
HP_OVERWEIGHT	HP_OVERWEIGHT	25	0.727184	1.66946	0.025	1	1	10762	tags=36%, list=19%, signal=29%	NEUROD1/PAX4/HNF1A/INS/KCNJ11/PDX1/HNF4A/CEL/ABCC8
HP_PANCREATIC_HYPOPLASIA	HP_PANCREATIC_HYPOPLASIA	25	0.72607	1.6669	0.025	1	1	10762	tags=40%, list=19%, signal=32%	NEUROD1/PAX4/HNF1A/INS/KCNJ11/PTF1A/PDX1/HNF4A/CEL/ABCC8
HP_TRACHEOESOPHAGEAL_FISTULA	HP_TRACHEOESOPHAGEAL_FISTULA	74	0.522545	1.47443	0.025	1	1	15264	tags=42%, list=27%, signal=31%	ZIC3/PROKR2/OTX2/GREB1L/BRIP1/FANCA/TERT/XRCC2/FANCB/FANCC/SOX2/RAD51/BRCA1/HESX1/FANCE/FANCI/FANCD2/FBN2/UBE2T/BRCA2/RAD51C/FANCG/SOX3/MYCN/ERCC4/MAD2L2/RFC2/PALB2/FANCM/RFWD3/WRAP53
GOBP_HISTONE_H3_K4_METHYLATION	GOBP_HISTONE_H3_K4_METHYLATION	53	0.641795	1.67262	0.025641	1	1	4725	tags=13%, list=8%, signal=12%	GCG/CTCFL/DYDC1/DYDC2/PRDM7/PRDM9/MYB
GOBP_HOMOLOGOUS_CHROMOSOME_SEGREGATION	GOBP_HOMOLOGOUS_CHROMOSOME_SEGREGATION	58	0.60061	1.60363	0.025641	1	1	11484	tags=45%, list=20%, signal=36%	SYCP1/MAEL/TEX15/DMC1/PRDM9/FMN2/SPO11/STAG3/CCNE2/SYCE2/BRIP1/SGO1/ESPL1/MEIKIN/SPATA22/SYCP2/MEI4/MAJIN/RAD21L1/PLK1/MEIOC/TRIP13/CCNE1/MEIOB/SGO2/FANCD2
GOBP_HOMOLOGOUS_RECOMBINATION	GOBP_HOMOLOGOUS_RECOMBINATION	59	0.533933	1.42501	0.025641	1	1	15513	tags=51%, list=27%, signal=37%	SYCP1/PRDM7/DMC1/PRDM9/SPO11/TEX19/BRIP1/EME1/RAD54L/RAD51AP1/MND1/PSMC3IP/HSF2BP/TRIP13/RMI1/RAD51/MSH5/MEIOB/FANCD2/RAD51C/TOP2A/CORT/HFM1/ERCC4/CENPS/MSH4/RAD51D/FANCM/RAD54B/C11orf80
GOBP_LIPOPOLYSACCHARIDE_MEDIATED_SIGNALING_PATHWAY	GOBP_LIPOPOLYSACCHARIDE_MEDIATED_SIGNALING_PATHWAY	58	0.558602	1.49147	0.025641	1	1	218	tags=2%, list=0%, signal=2%	DEFB114
GOBP_MECHANORECEPTOR_DIFFERENTIATION	GOBP_MECHANORECEPTOR_DIFFERENTIATION	62	0.576486	1.56661	0.025641	1	1	8096	tags=19%, list=14%, signal=17%	GRXCR1/ATOH1/CLRN1/GABRA5/GABRB2/USH2A/LHFPL5/MCOLN3/GRXCR2/USH1C/USH1G/POU4F3
GOBP_NEURON_FATE_COMMITMENT	GOBP_NEURON_FATE_COMMITMENT	59	0.683275	1.8236	0.025641	1	1	9583	tags=41%, list=17%, signal=34%	LHX3/GSX2/ATOH1/OLIG3/SOX1/FEV/FOXN4/MYT1L/POU3F2/ASCL1/DBX1/GSX1/NKX2-2/FEZF2/GBX1/POU4F1/PTF1A/OLIG1/PAX6/MNX1/DLX2/ISL1/TLX3/DMRTA2
GOBP_SISTER_CHROMATID_COHESION	GOBP_SISTER_CHROMATID_COHESION	62	0.552952	1.50266	0.025641	1	1	21422	tags=71%, list=38%, signal=44%	SMC1B/HORMAD2/STAG3/DDX11L8/HASPIN/SGO1/ESPL1/MEIKIN/RAD21L1/PLK1/CDCA5/ESCO2/DSCC1/BUB1B/BUB1/DDX12P/SGO2/FEN1/RAD51C/CDC20/SLF1/KIF22/DDX11/HORMAD1/SMC1A/STAG2/SMC3/TENT4A/STAG1/RAD21/POGZ/SMC5/PDS5B/MRE11/NSMCE2/STAG3L4/HDAC8/NAA10/MCMBP/CHTF8/REC8/CTCF/NAA50/BOD1
GOCC_NEURON_PROJECTION_MEMBRANE	GOCC_NEURON_PROJECTION_MEMBRANE	59	0.599562	1.60017	0.025641	1	1	7670	tags=25%, list=14%, signal=22%	GABRA1/KCNC1/GABRA5/SHISA9/GABRA4/USH2A/KCNC2/SHISA8/GABRG3/CNTNAP2/GABRA6/KCNJ11/REG1A/MPP2/AKAP5
GOCC_STEREOCILIUM_BUNDLE	GOCC_STEREOCILIUM_BUNDLE	61	0.534911	1.44749	0.025641	1	1	5570	tags=13%, list=10%, signal=12%	GRXCR1/CLRN1/KNCN/MYO3A/USH2A/LHFPL5/PCDH15/GRXCR2
GOMF_L_AMINO_ACID_TRANSMEMBRANE_TRANSPORTER_ACTIVITY	GOMF_L_AMINO_ACID_TRANSMEMBRANE_TRANSPORTER_ACTIVITY	59	0.590127	1.57499	0.025641	1	1	5416	tags=15%, list=10%, signal=14%	SLC17A6/SLC32A1/SLC6A5/SLC17A8/SLC22A2/OCA2/SLC6A20/SLC1A2/SLC38A3
HP_ABNORMAL_HEMOGLOBIN	HP_ABNORMAL_HEMOGLOBIN	54	0.604836	1.56522	0.025641	1	1	10762	tags=20%, list=19%, signal=17%	NEUROD1/PAX4/HNF1A/INS/KCNJ11/KLF1/PDX1/HNF4A/HBG1/CEL/ABCC8
HP_CENTRAL_HYPOTHYROIDISM	HP_CENTRAL_HYPOTHYROIDISM	62	0.530686	1.44215	0.025641	1	1	9909	tags=24%, list=18%, signal=20%	LHX3/TRH/IRS4/OTX2/OCA2/FOXA2/POU3F4/PROP1/MAGEL2/FGF8/POMC/SIM1/TERT/ZIC2/SIX3
HP_EEG_WITH_ABNORMALLY_SLOW_FREQUENCIES	HP_EEG_WITH_ABNORMALLY_SLOW_FREQUENCIES	62	0.542707	1.47481	0.025641	1	1	6866	tags=15%, list=12%, signal=13%	ACTL6B/HCN1/GABRA5/CNKSR2/GABRB2/OCA2/GRIN2A/SLC1A2/SCN8A
HP_NEONATAL_ONSET	HP_NEONATAL_ONSET	54	0.539697	1.39665	0.025641	1	1	10340	tags=26%, list=18%, signal=21%	IRS4/NEUROG3/KCNQ2/AQP2/KCNJ11/CARMIL2/SLC1A2/AKR1D1/MCIDAS/GAD1/RYR1/IL36RN/ATP6V0A4/OXCT1
HP_PROXIMAL_TUBULOPATHY	HP_PROXIMAL_TUBULOPATHY	54	0.651441	1.68583	0.025641	1	1	43	tags=2%, list=0%, signal=2%	MT-TQ
GOBP_CIRCADIAN_SLEEP_WAKE_CYCLE	GOBP_CIRCADIAN_SLEEP_WAKE_CYCLE	26	0.705391	1.60787	0.0263158	1	1	5680	tags=23%, list=10%, signal=21%	NPS/GHRH/NPY2R/CHRNB2/DRD3/NMU
GOBP_DNA_MODIFICATION	GOBP_DNA_MODIFICATION	118	0.522595	1.51084	0.0263158	1	1	14118	tags=31%, list=25%, signal=24%	DNMT3L/CTCFL/DPPA3/H1-8/TDRD1/APOBEC1/MAEL/DDX4/TEX15/ASZ1/PRDM14/AICDA/TDRD9/PIWIL2/TDRD12/TDRKH/EZH2/ZFP57/CYP1A1/BRCA1/HELLS/TET1/APOBEC3B/WT1/DNMT3B/FKBP6/STPG4/BEND3/TOX/OGG1/METTL4/PLD6/DNMT1/PPM1D/PARP2/PIWIL4/MIS18A
GOBP_NEUROPEPTIDE_SIGNALING_PATHWAY	GOBP_NEUROPEPTIDE_SIGNALING_PATHWAY	106	0.546887	1.55518	0.0263158	1	1	9473	tags=34%, list=17%, signal=28%	NPS/PDYN/NPVF/PROKR2/PRLHR/OPRK1/GPR139/PROKR1/NXPH2/PPY/SORCS3/GPR149/NPPB/PTH2/GALP/GLRA2/NPY2R/MCHR2/NMU/NMS/GPR37/MCHR1/POMC/TAC1/GPR83/RXFP3/CALCA/HCRTR1/PYY/NPFFR1/NPB/NMUR2/ECEL1/NPFFR2/NPY5R/UTS2R
GOBP_NUCLEOTIDE_EXCISION_REPAIR	GOBP_NUCLEOTIDE_EXCISION_REPAIR	107	0.460677	1.3123	0.0263158	1	1	22797	tags=58%, list=40%, signal=35%	CETN1/BRIP1/FANCC/RFC4/POLE/RPA3/BRCA2/RFC3/OGG1/GTF2H4/POLR2F/POLD1/ERCC4/RFC5/POLD3/PCNA/RFC2/LIG1/ISY1/RFC1/RPA1/RPA2/NTHL1/LIG3/POLD2/POLR2I/POLR2D/XRCC1/PARP1/RAD23B/CETN2/USP7/MNAT1/ZNF830/COPS3/PPIE/POLR2G/CHD1L/GPS1/POLR2H/POLR2K/HMGN1/RAD23A/HUS1/ERCC3/PRPF19/COPS6/HMGB1/HUS1B/CUL4A/COPS7B/XAB2/KAT7/ERCC2/XPA/GTF2H2/GTF2H3/POLR2J/POLR2C/ATXN3/COPS4/COPS5
GOBP_REGULATION_OF_CIRCADIAN_RHYTHM	GOBP_REGULATION_OF_CIRCADIAN_RHYTHM	118	0.483862	1.39886	0.0263158	1	1	12811	tags=22%, list=23%, signal=17%	NPS/GHRH/SOX14/NPY2R/ATOH7/CHRNB2/DRD3/NMU/PIWIL2/MAGEL2/SPSB4/PASD1/OPN5/NLGN1/EZH2/HNF4A/DRD2/NKX2-1/PROX1/ADCY1/PRKAA2/TOP2A/SUV39H1/CDK1/SUV39H2/TIMELESS
GOBP_REGULATION_OF_HISTONE_METHYLATION	GOBP_REGULATION_OF_HISTONE_METHYLATION	60	0.556998	1.47249	0.0263158	1	1	13044	tags=23%, list=23%, signal=18%	GCG/CTCFL/PRDM9/MYB/EZHIP/PAX5/PHF19/PRDM12/BRCA1/TET1/KDM4D/DNMT3B/GFI1/DNMT1
GOBP_RESPONSE_TO_CATECHOLAMINE	GOBP_RESPONSE_TO_CATECHOLAMINE	107	0.540328	1.5392	0.0263158	1	1	8001	tags=21%, list=14%, signal=18%	OR10H3/OR10H4/HTR5A/OR10J5/HTR1A/HTR3B/HTR3A/HRH3/OR10H5/NSG2/OR10J6P/SULT1A4/HTR1D/PKLR/OR10H2/DRD3/CHRM4/HTR6/OR5T2/APLP1/CHRM5/CALY
GOBP_TRANSLATIONAL_TERMINATION	GOBP_TRANSLATIONAL_TERMINATION	105	0.470979	1.34147	0.0263158	1	1	25778	tags=82%, list=46%, signal=45%	MRPS17/MRPL9/MRPL11/GLE1/MRPS24/ERAL1/MRPS23/MRPL2/MRPL53/MRPL37/MRPL36/MRPL13/MRPL50/MRPL38/JMJD4/MRPS18C/MRPL48/MRPS2/MRPS18B/C12orf65/MRPL14/MRPL33/MRPL49/DAP3/MRPL58/MRPL47/GSPT1/MRPL51/MRPL55/MRPL3/MRPL12/MRPS14/MRPS7/MRPS22/MRPL16/MRPL46/MRPS10/MRPL45/MRPS5/MRPS26/MRPS33/MRPL39/MRPL52/MRPL4/MRPS12/MRPL17/MRPS18A/AURKAIP1/MRPS11/MRPL57/MRPL1/CHCHD1/MRPS25/MRPL20/MRPS16/MRPL23/MRPL10/MRPS28/M…
GOCC_INTRINSIC_COMPONENT_OF_POSTSYNAPTIC_MEMBRANE	GOCC_INTRINSIC_COMPONENT_OF_POSTSYNAPTIC_MEMBRANE	105	0.491939	1.40117	0.0263158	1	1	7199	tags=22%, list=13%, signal=19%	CACNG2/HTR5A/GABRA5/CDH9/SHISA9/SLITRK1/HTR3A/GABRA4/PCDH8/GABRB2/SORCS3/GRM3/DCC/GRIN2A/KCNA1/CSPG5/DRD3/ERBB4/CNIH2/GRID2/PTPRT/CACNG5/CACNG4
GOCC_INTRINSIC_COMPONENT_OF_SYNAPTIC_VESICLE_MEMBRANE	GOCC_INTRINSIC_COMPONENT_OF_SYNAPTIC_VESICLE_MEMBRANE	44	0.662	1.58796	0.0263158	1	1	7418	tags=18%, list=13%, signal=16%	SLC17A6/SLC32A1/SYNPR/SYT4/SLC17A8/SLC30A3/SYP/CPLX3
HP_APHASIA	HP_APHASIA	77	0.571283	1.59409	0.0263158	1	1	3797	tags=5%, list=7%, signal=5%	MT-TQ/ACTL6B/MYT1L/GRIN2A
HP_FOCAL_MOTOR_SEIZURE	HP_FOCAL_MOTOR_SEIZURE	77	0.500229	1.39582	0.0263158	1	1	9093	tags=17%, list=16%, signal=14%	GABRA1/CACNG2/MYT1L/KIF1A/GRIN2A/SCN1A/KCNQ2/CAMK2B/BRSK2/SCN8A/FRRS1L/KCNQ5/SCN2A
HP_GASTROINTESTINAL_DYSMOTILITY	HP_GASTROINTESTINAL_DYSMOTILITY	77	0.527361	1.47153	0.0263158	1	1	43	tags=1%, list=0%, signal=1%	MT-TQ
HP_KETOACIDOSIS	HP_KETOACIDOSIS	28	0.690108	1.65687	0.0263158	1	1	10762	tags=36%, list=19%, signal=29%	SHOX/PAX4/HNF1A/INS/KCNJ11/CA5A/ZFP57/HNF4A/OXCT1/ABCC8
GOBP_CHROMOSOME_LOCALIZATION	GOBP_CHROMOSOME_LOCALIZATION	80	0.546374	1.52875	0.027027	1	1	16536	tags=41%, list=29%, signal=29%	FMN2/SPO11/KIF2B/KIF18A/NUF2/NDC80/CDT1/MAJIN/RAD21L1/CDCA5/MEIOC/KIFC1/CENPF/DLGAP5/PSRC1/KIF14/KIF2C/AURKB/CDCA8/SPAG5/CENPE/FAM83D/CENPQ/INCENP/NDE1/KIF22/CCNB1/SPDL1/SPICE1/SEH1L/CHAMP1/ZW10/MAD1L1
GOBP_ENDOTHELIAL_CELL_PROLIFERATION	GOBP_ENDOTHELIAL_CELL_PROLIFERATION	177	-0.514352	-1.42173	0.027027	1	1	15627	tags=25%, list=28%, signal=18%	MEF2C/BMP2/FLT1/CDH13/VEGFD/ITGA4/PRKD1/MIR126/IGF2/WNT5A/MIR149/TNMD/TEK/HTR2B/BMPER/MIR152/PLXNB3/MIR494/ITGB3/ATOH8/MIR27B/ARG1/MIR132/MIR10B/MIR98/MIR483/MIR23A/AGTR1/PROK2/MIR135B/MIR27A/MIR222/MIR101-1/MIR2355/MIR16-1/MIR487B/MIR26A1/MIR361/MIR30B/MIR495/MIR30E/MIR133B/MIR15B/MIR329-1
GOBP_INTERSTRAND_CROSS_LINK_REPAIR	GOBP_INTERSTRAND_CROSS_LINK_REPAIR	57	0.583062	1.52576	0.027027	1	1	17761	tags=63%, list=31%, signal=43%	FANCA/NEIL3/EME1/FANCB/RAD51AP1/FANCC/SLX1B/HROB/RAD51/MCM8/FANCE/RAD51AP2/FANCI/FANCD2/UBE2T/RPA3/DCLRE1B/FANCG/XRCC3/USP1/FAAP24/MSH6/EXO5/ERCC4/CENPS/RAD51D/FANCM/RFWD3/RNF168/DCLRE1A/CENPX/RPA1/RPA2/FANCL/RNF8/DCLRE1C
GOBP_NEGATIVE_REGULATION_OF_RECEPTOR_SIGNALING_PATHWAY_VIA_JAK_STAT	GOBP_NEGATIVE_REGULATION_OF_RECEPTOR_SIGNALING_PATHWAY_VIA_JAK_STAT	27	0.700533	1.64667	0.027027	1	1	1733	tags=7%, list=3%, signal=7%	NEUROD1/MIR9-1
GOBP_NEURON_FATE_SPECIFICATION	GOBP_NEURON_FATE_SPECIFICATION	27	0.793946	1.86624	0.027027	1	1	3359	tags=41%, list=6%, signal=38%	LHX3/GSX2/ATOH1/OLIG3/SOX1/FEV/MYT1L/POU3F2/ASCL1/DBX1/NKX2-2
GOBP_OLIGOSACCHARIDE_METABOLIC_PROCESS	GOBP_OLIGOSACCHARIDE_METABOLIC_PROCESS	56	0.646305	1.67897	0.027027	1	1	5538	tags=20%, list=10%, signal=18%	ST8SIA3/GAL3ST3/LALBA/FUT5/AMY1B/GBA3/AMY1A/AMY1C/ST8SIA2/ST8SIA5/B3GALT1
GOBP_PEPTIDYL_LYSINE_METHYLATION	GOBP_PEPTIDYL_LYSINE_METHYLATION	121	0.479035	1.39428	0.027027	1	1	20551	tags=45%, list=36%, signal=29%	GCG/CTCFL/DYDC1/SMYD1/DYDC2/PRDM7/PRDM9/MYB/EZHIP/PRDM16/PAX5/EZH2/PHF19/PRDM12/BRCA1/CHD5/KDM4D/DNMT3B/BEND3/SUV39H1/GFI1/SUV39H2/NSD2/DNMT1/METTL22/PAGR1/KMT5C/SUZ12/PAXIP1/METTL21A/EHMT2/WDR5/ZNF274/WDR5B/SETDB1/DPY30/NELFE/MTF2/EHMT1/PYGO2/JARID2/CXXC1/EED/SETD6/SETD1A/RIF1/KDM6A/SETD3/RBBP5/EEF1AKMT2/ASH2L/DOT1L/TET3/PRMT6/EEF2KMT
GOCC_CONDENSED_CHROMOSOME_CENTROMERIC_REGION	GOCC_CONDENSED_CHROMOSOME_CENTROMERIC_REGION	117	0.581031	1.68053	0.027027	1	1	18795	tags=64%, list=33%, signal=43%	BOD1L2/KIF2B/SGO1/CENPA/NEK2/SPC25/MEIKIN/NUF2/NDC80/CDT1/CENPK/SKA1/KNL1/MAD2L1/PLK1/SPC24/SKA3/ERCC6L/KNTC1/CENPU/NCAPG/CENPF/BUB1B/KIF2C/AURKB/BUB1/HJURP/SPAG5/BIRC5/CENPO/DSN1/SGO2/CENPE/ZWINT/CENPN/CENPM/KNSTRN/ITGB3BP/CENPW/INCENP/CENPH/NDE1/NCAPD3/CENPS/SKA2/KMT5C/CCNB1/SPDL1/NCAPD2/NUP85/SEH1L/MIS18BP1/TEX14/SMC1A/CENPV/CHAMP1/ZW10/ZWILCH/CENPX/PMF1/SEPTIN6/MAD1L1/SPOUT1/NSL1/CENPT/SS18L1…
GOCC_SYNAPTIC_VESICLE_MEMBRANE	GOCC_SYNAPTIC_VESICLE_MEMBRANE	103	0.513406	1.45679	0.027027	1	1	9197	tags=18%, list=16%, signal=15%	GAD2/SLC17A6/SLC32A1/SYNPR/SYT4/SLC17A8/SYNGR4/SVOP/SYT6/SLC30A3/SH3GL2/DOC2A/SYP/BSN/CPLX3/SV2B/UNC13A/SYT12/SYN3
GOMF_OXIDOREDUCTASE_ACTIVITY_ACTING_ON_A_SULFUR_GROUP_OF_DONORS	GOMF_OXIDOREDUCTASE_ACTIVITY_ACTING_ON_A_SULFUR_GROUP_OF_DONORS	57	0.537944	1.40769	0.027027	1	1	684	tags=2%, list=1%, signal=2%	GRXCR1
GOMF_SINGLE_STRANDED_DNA_BINDING	GOMF_SINGLE_STRANDED_DNA_BINDING	116	0.496427	1.43219	0.027027	1	1	23183	tags=70%, list=41%, signal=41%	DMC1/POU4F1/MYEF2/NEIL3/MCM10/RAD51AP1/CDC45/MCM2/HROB/RAD51/SMC2/MCM8/RAD18/BLM/MEIOB/RAD51AP2/RPA3/BRCA2/POLA1/MCM6/MSH2/MCM5/HMGB2/ERCC4/SMC4/MCM4/DDX11/TOP3A/RAD51D/MCM7/TDP1/SMC6/RNF138/MCM3/HMCES/RPA1/SAMHD1/RPA2/REXO4/APTX/POT1/POLR2D/POLR3C/RBBP8/RAD51B/NABP2/FAM111A/MAPT/RAD23B/FUBP3/NUP35/SUB1/TSN/FUBP1/SSBP3/NUCKS1/WBP11/POLR2G/POLR2H/TDP2/NME1/RAD23A/TERF2/DHX36/HMGB1/PMS2/HNRNPA2B1/D…
HP_APLASIA_HYPOPLASIA_AFFECTING_THE_ANTERIOR_SEGMENT_OF_THE_EYE	HP_APLASIA_HYPOPLASIA_AFFECTING_THE_ANTERIOR_SEGMENT_OF_THE_EYE	121	0.533794	1.55366	0.027027	1	1	15502	tags=34%, list=27%, signal=25%	MIR184/COL2A1/FGF3/PAX6/BRIP1/LRP2/FANCA/DLX6/XRCC2/FANCB/FANCC/FOXE3/TRIP13/RAD51/BRCA1/WT1/SALL4/RPGRIP1/FANCE/FANCI/FANCD2/UBE2T/CEP55/BRCA2/RAD51C/FANCG/HMX1/NSD2/WNT10B/LMX1B/ERCC4/MAD2L2/DLX5/RFC2/TMEM107/PALB2/FANCM/RFWD3/PITX2/PAX3/TCTN2
HP_APLASIA_HYPOPLASIA_AFFECTING_THE_FUNDUS	HP_APLASIA_HYPOPLASIA_AFFECTING_THE_FUNDUS	120	0.466348	1.3538	0.027027	1	1	17013	tags=39%, list=30%, signal=27%	LHX3/SLC38A8/PROKR2/OTX2/OCA2/FOXA2/PROM1/PDE6H/PTF1A/PROP1/SCN8A/PAX6/ZIC1/FOXE3/ELOVL4/SOX2/CENPF/WT1/KIF14/SALL4/HESX1/FANCI/PRPH2/KNSTRN/WNT3/SOX3/HMX1/NDE1/SLC24A5/CDON/TUBB3/GRIA4/GPR143/POMT1/RTTN/FOXG1/GPR161/TUBA8/POU1F1/SLC45A2/DNMT3A/CNGA3/STAG2/LHX4/NEU1/ATAD3A/MC1R
HP_FOCAL_NON_MOTOR_SEIZURE	HP_FOCAL_NON_MOTOR_SEIZURE	57	0.543387	1.42193	0.027027	1	1	12404	tags=30%, list=22%, signal=23%	CACNG2/MYT1L/KIF1A/KCNA1/SCN1A/KCNQ2/CAMK2B/BRSK2/SCN8A/KCNQ5/RELN/PHGDH/GRIN1/MED12L/CACNA1A/NHLRC1/LGI1
HP_TONIC_SEIZURE	HP_TONIC_SEIZURE	82	0.574934	1.61954	0.027027	1	1	9093	tags=22%, list=16%, signal=18%	GABRA1/CACNG2/GABRA5/MYT1L/KIF1A/GRIN2A/NEUROD2/KCNA1/SCN1A/KCNQ2/GRIA2/CAMK2B/BRSK2/SCN8A/CUX2/DNM1/KCNQ5/SCN2A
GOBP_ANAPHASE_PROMOTING_COMPLEX_DEPENDENT_CATABOLIC_PROCESS	GOBP_ANAPHASE_PROMOTING_COMPLEX_DEPENDENT_CATABOLIC_PROCESS	83	0.535379	1.52043	0.0277778	1	1	22475	tags=70%, list=40%, signal=42%	UBE2DNL/PSMA8/CDC20B/MAD2L1/PLK1/FBXO5/PSMB11/BUB1B/AURKB/AURKA/CDC20/CDK1/UBE2C/CDK2/PTTG1/PSMB9/UBE2S/CCNB1/PSMD11/PSMA2/ANAPC2/PSMC1/ANAPC11/PSMD4/ANAPC10/PSMB2/PSMB7/PSMB4/PSMA6/PSMD9/PSMD10/PSMD3/PSMD2/PSMC3/CDC26/PSMD14/PSMA5/PSMC2/PSMB8/PSMD7/PSMA7/PSMC4/PSMD12/PSMB3/CDC23/PSMD13/PSMA1/PSMB6/PSMA4/BUB3/PSME2/PSMC5/PSMD8/PSMC6/PSMB5/PSMA3/PSMD5/PSMB1
GOBP_DIGESTIVE_SYSTEM_PROCESS	GOBP_DIGESTIVE_SYSTEM_PROCESS	99	0.508362	1.42862	0.0277778	1	1	10382	tags=26%, list=18%, signal=21%	NEUROG1/PNLIP/NEUROD1/CCKBR/OPRK1/APOA4/AQP5/VIL1/MUC6/DRD3/CRACD/NMU/FABP2/MUC4/CHRM5/TAC1/SOAT2/WNK4/GHSR/FABP1/SLC9A4/MUC13/ABCG8/OXTR/CEL/APOA5
GOBP_DNA_GEOMETRIC_CHANGE	GOBP_DNA_GEOMETRIC_CHANGE	114	0.489478	1.40319	0.0277778	1	1	22054	tags=57%, list=39%, signal=35%	DDX11L8/BRIP1/RAD54L/POLQ/PIF1/MCM2/DSCC1/RAD51/ERCC6L/RFC4/MCM8/BLM/DNA2/CHD5/DDX12P/RECQL4/RFC3/TOP2A/MCM6/CHTF18/NAV2/MCM5/GTF2H4/HMGB2/HFM1/RFC5/MCM4/DDX11/RFC2/MCM7/FANCM/MCM3/HMGB3/RAD54B/RUVBL1/RPA1/RECQL5/POT1/PARP1/RAD23B/WRNIP1/MRE11/CETN2/MNAT1/CHD1L/ERCC3/CHD7/CHTF8/DHX36/HMGB1/CUL4A/HMGA1/HNRNPA2B1/ERCC2/DHX9/XPA/ZRANB3/GTF2H2/GTF2H3/MTERF1/SSBP1/HELB/RUVBL2/ANXA1/SUPV3L1
GOBP_ENDOCRINE_SYSTEM_DEVELOPMENT	GOBP_ENDOCRINE_SYSTEM_DEVELOPMENT	122	0.469966	1.35879	0.0277778	1	1	11693	tags=26%, list=21%, signal=21%	NEUROD1/LHX3/INSM1/GHRH/PAX4/POU3F2/ASCL1/NEUROG3/GSX1/NKX2-2/NR5A1/FOXA2/PAX1/PDX1/ONECUT2/PROP1/FGF8/OTP/PAX6/MNX1/NOG/ISL1/HNF4A/SOX2/SIX3/DRD2/NKX2-1/WT1/WNT11/HESX1/ONECUT1/NKX6-1
GOBP_MRNA_EXPORT_FROM_NUCLEUS	GOBP_MRNA_EXPORT_FROM_NUCLEUS	113	0.456556	1.31004	0.0277778	1	1	24031	tags=72%, list=43%, signal=41%	NXF2B/NXF5/DDX25/NUP210/NXF2/NUP155/MAGOHB/THOC1/NUP188/NUP85/SEH1L/UPF3B/ALYREF/CPSF4/NDC1/NUP214/GLE1/SLBP/NUP205/NUP93/NCBP1/NUP160/EIF4A3/CPSF3/NUP107/POLR2D/FIP1L1/NXT1/NUP153/RBM8A/MAGOH/ENY2/NUP37/DDX39A/UPF2/NUP54/SMG5/THOC5/NUP62/RAE1/NUP35/SEC13/CHTOP/HHEX/RNPS1/PCID2/NSUN2/U2AF1L4/DDX19A/CPSF1/CASC3/CPSF2/NUP88/NUP133/NUP58/DHX38/SRSF3/HNRNPA2B1/NUP43/SRSF2/THOC3/DDX19B/SRSF9/SMG7/U2AF…
GOBP_REGULATION_OF_MITOTIC_NUCLEAR_DIVISION	GOBP_REGULATION_OF_MITOTIC_NUCLEAR_DIVISION	109	0.468854	1.32646	0.0277778	1	1	19769	tags=57%, list=35%, signal=37%	INS/DMRT1/DRD3/FBXO43/FGF8/CDC25C/NEK2/ESPL1/NDC80/CHEK1/PKMYT1/CDT1/USP44/MAD2L1/TTK/PLK1/TRIP13/PDXP/FBXO5/KNTC1/MTBP/CENPF/DLGAP5/BUB1B/AURKB/BUB1/NUSAP1/MKI67/ZWINT/AURKA/BORA/CDC20/XRCC3/EGF/CDK5RAP2/SMPD3/GEN1/KIF20B/MAD2L2/CCNB1/SPDL1/TEX14/SPHK1/ZW10/MAD1L1/TGFA/CCDC8/RCC1/ANAPC11/KLHL22/RAD21/PIN1/LCMT1/BTC/NUP62/NSMCE2/TOM1L1/MAD2L1BP/FBXW5/PCID2/PSMG2/PRMT5
GOBP_REGULATION_OF_MUSCLE_CELL_DIFFERENTIATION	GOBP_REGULATION_OF_MUSCLE_CELL_DIFFERENTIATION	151	-0.506119	-1.38541	0.0277778	1	1	439	tags=4%, list=1%, signal=4%	MIR125B1/MIR133B/MIR1-1/MIR15B/MIR206/MIR100
GOBP_REGULATION_OF_RECEPTOR_SIGNALING_PATHWAY_VIA_STAT	GOBP_REGULATION_OF_RECEPTOR_SIGNALING_PATHWAY_VIA_STAT	109	0.460437	1.30265	0.0277778	1	1	8579	tags=17%, list=15%, signal=15%	NEUROD1/CSH1/CSH2/IFNA6/MIR9-1/IFNA16/IFNA2/IFNA13/IFNA10/PRLR/CSHL1/ERBB4/PTPRT/GH2/IFNL1/PRL/IFNG/CDK5R1/IFNA5
GOBP_SPINAL_CORD_DEVELOPMENT	GOBP_SPINAL_CORD_DEVELOPMENT	99	0.569057	1.59919	0.0277778	1	1	4190	tags=16%, list=7%, signal=15%	UNCX/LHX3/GSX2/ACTL6B/OLIG3/SOX1/FOXN4/ASCL1/DRGX/NEUROG3/DBX1/GSX1/NKX2-2/DCC/GBX1/RFX4
GOCC_POSTSYNAPTIC_SPECIALIZATION_MEMBRANE	GOCC_POSTSYNAPTIC_SPECIALIZATION_MEMBRANE	109	0.464436	1.31396	0.0277778	1	1	7199	tags=21%, list=13%, signal=18%	CACNG2/HTR5A/GABRA5/SHISA9/SLITRK1/GABRA4/CNKSR2/GABRB2/GRM5/SORCS3/DCC/GRIN2A/GRIA2/ACTN2/DRD3/ATP2B2/ERBB4/CNIH2/GRID2/PTPRT/CACNG5/GRIN2C/CACNG4
GOMF_AMINO_ACID_TRANSMEMBRANE_TRANSPORTER_ACTIVITY	GOMF_AMINO_ACID_TRANSMEMBRANE_TRANSPORTER_ACTIVITY	81	0.495216	1.383	0.0277778	1	1	5416	tags=12%, list=10%, signal=11%	SLC17A6/SLC32A1/SLC38A8/SLC6A5/SLC17A8/SLC22A2/OCA2/SLC6A20/SLC1A2/SLC38A3
GOMF_HORMONE_ACTIVITY	GOMF_HORMONE_ACTIVITY	122	0.50326	1.45505	0.0277778	1	1	14831	tags=48%, list=26%, signal=35%	CSH1/GCG/CSH2/GHRH/TRH/GPHB5/CGB1/UCN3/PRLH/PPY/NPPB/CALCB/GALP/INS/FSHB/RLN2/RETNLB/PMCHL2/CSHL1/ENHO/RLN1/GAST/AMH/INHBC/GH2/POMC/PRL/CALCA/PYY/CGB3/KL/FNDC5/TSHB/PNOC/INSL4/AVP/TTR/CHGB/BMP10/CARTPT/INS-IGF2/CGB2/VIP/EDN2/CORT/CGA/GIP/VGF/EPO/NPPC/ADM2/GAL/QRFP/ERFE/GRP/NPY/RLN3/SCT
GOMF_ODORANT_BINDING	GOMF_ODORANT_BINDING	114	0.505409	1.44886	0.0277778	1	1	6780	tags=40%, list=12%, signal=36%	OR5D18/OR8J3/OR5AL1/OR5L2/OR8H3/OR5AR1/OR5M1/OR14C36/OR9G4/OR5M9/OR5H14/OR5M10/OR5B3/OR5K4/OR8K5/OR14I1/OR5AK3P/OR5D14/OR10J4/OR8H2/OR9Q2/OR4E2/OR10J1/OR5B12/OR5H2/OR5M3/OR5B17/OR5H8/OR10J3/OR5D16/OR5AU1/OR6K3/OR5AC1/OR8G3P/OR8G5/OR8D4/OR5H15/OR5W2/OR6B2/OR8G1/OR8A1/OR5AN1/OR10Q1/OR5A1/OR10K2/OR12D2
HP_ABNORMALITY_OF_CORNEAL_THICKNESS	HP_ABNORMALITY_OF_CORNEAL_THICKNESS	114	0.446132	1.27893	0.0277778	1	1	9370	tags=13%, list=17%, signal=11%	MIR184/CLRN1/USH2A/RLBP1/PROM1/RGR/RHO/AIPL1/CHST6/CRX/CRB1/FAM161A/NEK2/FOXE3/CA4
HP_EPILEPTIC_ENCEPHALOPATHY	HP_EPILEPTIC_ENCEPHALOPATHY	100	0.509806	1.43918	0.0277778	1	1	12840	tags=27%, list=23%, signal=21%	DCX/GABRA1/HCN1/GABRB2/NEUROD2/SCN1A/KCNQ2/CNTNAP2/CACNA1E/SLC1A2/NRXN1/GABRB1/SCN8A/CUX2/GABBR2/FRRS1L/DNM1/KCNQ5/SCN2A/ADAM22/GRIN1/KCNA2/GNAO1/CACNA1A/CLCN4/AP3B2/GABRB3
HP_GLOMERULAR_SCLEROSIS	HP_GLOMERULAR_SCLEROSIS	81	0.505666	1.41219	0.0277778	1	1	2004	tags=2%, list=4%, signal=2%	MT-TQ/PAX2
HP_MICROCORNEA	HP_MICROCORNEA	127	0.431332	1.26201	0.0277778	1	1	13380	tags=21%, list=24%, signal=16%	MIR184/GJA8/OTX2/ATOH7/CRYBA4/FGF3/PAX6/SLC16A12/FANCB/FOXE3/PLK4/PITX3/PRSS56/CENPF/SALL4/RPGRIP1/CRYBB2/RECQL4/KIF11/ANK1/CEP55/WNT3/PYCR1/HMX1/CRYGC/LMX1B/ADAMTS18
GOBP_CERAMIDE_METABOLIC_PROCESS	GOBP_CERAMIDE_METABOLIC_PROCESS	102	0.476588	1.33393	0.0285714	1	1	7380	tags=10%, list=13%, signal=9%	ST8SIA3/TLCD3B/FUT5/GAL3ST1/GBA3/ST8SIA2/B3GALT1/PNPLA1/CERS1/UGT8
GOBP_CYTOSKELETON_DEPENDENT_CYTOKINESIS	GOBP_CYTOSKELETON_DEPENDENT_CYTOKINESIS	98	0.483586	1.3482	0.0285714	1	1	12861	tags=26%, list=23%, signal=20%	SEPTIN14/SEPTIN3/FMN2/TRIM36/DCDC1/ROPN1B/CENPA/ESPL1/SEPTIN12/PLK1/KIF4B/CIT/KIF4A/AURKB/ECT2/KIF23/NUSAP1/STMN1/CEP55/RACGAP1/ANLN/SPIRE2/KIF20A/SHCBP1L/INCENP
GOBP_EAR_MORPHOGENESIS	GOBP_EAR_MORPHOGENESIS	110	0.45638	1.29224	0.0285714	1	1	17099	tags=41%, list=30%, signal=29%	NEUROG1/ATOH1/CLRN1/PAX2/MYO3A/LHFPL5/COL2A1/HPN/POU3F4/GRXCR2/FGF8/USH1C/OTX1/USH1G/POU4F3/DLX6/NOG/ZIC1/GBX2/PROX1/HESX1/TCAP/MYO7A/FOXI1/FZD2/TWIST1/WNT3A/EPHB2/DLX5/SOX9/FOXG1/PLS1/SIX4/SLC9A3R1/PDZD7/WHRN/NKX3-2/NTN1/TMIE/MAPK3/DVL2/TPRN/TTC39C/INSIG1/CTHRC1
GOBP_FEEDING_BEHAVIOR	GOBP_FEEDING_BEHAVIOR	93	0.463415	1.2992	0.0285714	1	1	10285	tags=27%, list=18%, signal=22%	GCG/TRH/PRLHR/PRLH/PPY/INS/NPY2R/POU4F1/MC4R/NMU/BRS3/CNR1/MCHR1/DMBX1/CALCA/HCRTR1/PYY/NPB/NMUR2/GHSR/NPY5R/RMI1/ACE2/OXTR/DRD2
GOBP_LIMBIC_SYSTEM_DEVELOPMENT	GOBP_LIMBIC_SYSTEM_DEVELOPMENT	98	0.52392	1.46064	0.0285714	1	1	13188	tags=31%, list=23%, signal=24%	NEUROD6/NEUROD1/SLC32A1/HTR5A/POU3F2/GSX1/FEZF2/RAX/KCNA1/CNTNAP2/NR2E1/OTP/CDK5R2/CDK5R1/ANXA3/EZH2/DLX2/RELN/DRD2/NKX2-1/KIF14/PROX1/HSD3B1/HSD3B2/DAB1/SOX3/HAP1/NKX2-6/SRD5A1/WNT3A
GOBP_MEIOSIS_I_CELL_CYCLE_PROCESS	GOBP_MEIOSIS_I_CELL_CYCLE_PROCESS	123	0.581524	1.68015	0.0285714	1	1	13818	tags=50%, list=24%, signal=38%	DNMT3L/SYCP1/PSMA8/BRDT/MAEL/DDX4/TEX15/PRDM7/DMC1/PRDM9/FMN2/SPO11/TEX19/DMRT1/STAG3/CCNE2/SYCE2/TDRD9/PIWIL2/BRIP1/CDC25C/EME1/SGO1/RAD54L/ESPL1/RAD51AP1/MEIKIN/SPATA22/MND1/SYCP2/MYBL1/PSMC3IP/MEI4/MAJIN/RAD21L1/CDC25A/PLK1/MEIOC/HSF2BP/TRIP13/RMI1/RAD51/FBXO5/CCNE1/CCNB2/MSH5/MEI1/MEIOB/SGO2/FANCD2/AURKA/BRCA2/RAD51C/TOP2A/CORT/MSH6/PTTG1/HFM1/ERCC4/CENPS/WEE2/CDC25B
GOBP_REGULATION_OF_DOUBLE_STRAND_BREAK_REPAIR	GOBP_REGULATION_OF_DOUBLE_STRAND_BREAK_REPAIR	86	0.492303	1.38542	0.0285714	1	1	19858	tags=49%, list=35%, signal=32%	KHDC3L/TEX15/FMN2/OOEP/RMI2/FANCB/RAD51AP1/CHEK1/POLQ/AUNIP/RAD51/FOXM1/FIGNL1/KDM4D/SPIRE2/OGG1/PARPBP/NSD2/TIMELESS/USP51/SLF1/TWIST1/DEK/CGAS/MAD2L2/DDX11/KMT5C/WRAP53/SHLD1/SMCHD1/RPA2/MAGEF1/RECQL5/POT1/PARP1/PARP9/UBQLN4/RIF1/PPP4C/FUS/NUDT16/DTX3L
GOCC_BRUSH_BORDER	GOCC_BRUSH_BORDER	101	0.491737	1.38448	0.0285714	1	1	12337	tags=27%, list=22%, signal=21%	SI/ANKS4B/SLC17A3/SLC26A3/VIL1/CDHR2/PDZK1/SLC28A1/ITLN1/SLC28A2/MYO1A/USH1C/LRP2/SOAT2/SLC34A2/FOLR1/SLC28A3/ATP6V0A4/CA4/ACE2/SLC9A3/SLC3A1/SLC34A3/SLC5A1/MME/DAB1/AMN
GOCC_CONDENSED_NUCLEAR_CHROMOSOME	GOCC_CONDENSED_NUCLEAR_CHROMOSOME	86	0.536694	1.51034	0.0285714	1	1	17296	tags=57%, list=31%, signal=40%	SYCP1/FAM9A/FAM9B/SMC1B/DMC1/HORMAD2/STAG3/FAM9C/SYCE2/RAD9B/CENPA/NEK2/NUF2/NDC80/CHEK1/CENPK/SYCP2/MEI4/RAD21L1/PLK1/RAD51/BRCA1/BUB1B/BUB1/BLM/CENPO/DSN1/FKBP6/BRCA2/SUV39H1/INCENP/TOPBP1/RSPH1/MSH4/RAD1/CCNB1/SYN1/H2AX/HORMAD1/MIS18BP1/SMC1A/PMF1/KIFAP3/SYCE1L/TUBG1/RCC1/SMC3/CENPT/RAD9A
GOCC_POSTSYNAPTIC_DENSITY_MEMBRANE	GOCC_POSTSYNAPTIC_DENSITY_MEMBRANE	86	0.48338	1.36031	0.0285714	1	1	7199	tags=22%, list=13%, signal=19%	CACNG2/SHISA9/SLITRK1/CNKSR2/GRM5/SORCS3/DCC/GRIN2A/GRIA2/ACTN2/DRD3/ATP2B2/ERBB4/CNIH2/GRID2/PTPRT/CACNG5/GRIN2C/CACNG4
GOMF_MRNA_3_UTR_BINDING	GOMF_MRNA_3_UTR_BINDING	138	-0.520774	-1.42218	0.0285714	1	1	7393	tags=16%, list=13%, signal=14%	MIR374B/MIR27A/DAZ1/MIR181A2/MIR31/MIR644A/MIR147A/MIR1298/MIR101-1/MIR16-1/MIR506/DAZ2/MIR103A1/MIR361/MIR374A/MIR30A/MIR28/MIR520C/MIR133B/MIR15B/MIR105-1/MIR206
GOMF_NEUROTRANSMITTER_RECEPTOR_ACTIVITY	GOMF_NEUROTRANSMITTER_RECEPTOR_ACTIVITY	110	0.538309	1.52423	0.0285714	1	1	6513	tags=26%, list=12%, signal=23%	OR10H3/GABRA1/OR10H4/HTR5A/OR10J5/HTR1A/HTR3B/GABRA5/HTR3A/GABRA4/GABRB2/GRM5/HRH3/OR10H5/GRIN2A/GABRG3/GLRA2/GRIA2/GABRA6/OR10J6P/CHRNB2/HTR1D/OR10H2/DRD3/CHRM4/GABRB1/GRID2/HTR6/OR5T2
HP_APLASIA_HYPOPLASIA_OF_THE_OPTIC_NERVE	HP_APLASIA_HYPOPLASIA_OF_THE_OPTIC_NERVE	84	0.498484	1.40148	0.0285714	1	1	16885	tags=40%, list=30%, signal=28%	LHX3/PROKR2/OTX2/FOXA2/PTF1A/PROP1/SCN8A/PAX6/ZIC1/FOXE3/SOX2/CENPF/WT1/KIF14/SALL4/HESX1/FANCI/KNSTRN/WNT3/SOX3/NDE1/CDON/TUBB3/GRIA4/POMT1/RTTN/FOXG1/GPR161/TUBA8/POU1F1/DNMT3A/STAG2/LHX4/ATAD3A
HP_ATONIC_SEIZURE	HP_ATONIC_SEIZURE	85	0.540248	1.52434	0.0285714	1	1	10892	tags=24%, list=19%, signal=19%	GABRA1/CACNG2/HCN1/MYT1L/KIF1A/GRIN2A/NEUROD2/KCNA1/SCN1A/CAMK2B/BRSK2/CUX2/FRRS1L/DNM1/KCNQ5/SCN2A/STX1B/PHGDH/GRIN1/MED12L
HP_NEPHROPATHY	HP_NEPHROPATHY	102	0.511395	1.43136	0.0285714	1	1	4815	tags=7%, list=9%, signal=6%	MT-TQ/NEUROD1/PAX4/HNF1A/CLDN19/INS/KCNJ11
GOBP_NEGATIVE_REGULATION_OF_VASCULATURE_DEVELOPMENT	GOBP_NEGATIVE_REGULATION_OF_VASCULATURE_DEVELOPMENT	129	-0.565209	-1.54729	0.0289855	1	1	5900	tags=12%, list=10%, signal=11%	MIR222/MIR377/MIR1298/MIR185/MIR16-1/MIR487B/MIR361/MIR30B/MIR495/MIR125B1/MIR640/MIR30E/MIR505/MIR217/MIR15B/MIR329-1
GOBP_DNA_METHYLATION_OR_DEMETHYLATION	GOBP_DNA_METHYLATION_OR_DEMETHYLATION	96	0.581425	1.62328	0.0294118	1	1	14118	tags=36%, list=25%, signal=27%	DNMT3L/CTCFL/DPPA3/H1-8/TDRD1/APOBEC1/MAEL/DDX4/TEX15/ASZ1/PRDM14/AICDA/TDRD9/PIWIL2/TDRD12/TDRKH/EZH2/ZFP57/CYP1A1/BRCA1/HELLS/TET1/APOBEC3B/WT1/DNMT3B/FKBP6/STPG4/BEND3/TOX/METTL4/PLD6/DNMT1/PPM1D/PIWIL4/MIS18A
GOBP_FEMALE_GAMETE_GENERATION	GOBP_FEMALE_GAMETE_GENERATION	128	0.424157	1.22975	0.0294118	1	1	14438	tags=37%, list=26%, signal=27%	SOHLH1/YBX2/GPR149/STRA8/FSHB/DMC1/PRDM9/FMN2/SPO11/NOBOX/DMRT1/AMH/PIWIL2/NANOS1/CGB3/MEIKIN/TUBB8/SYCP2/MEI4/TTK/PLK1/MEIOC/HROB/TRIP13/FBXO5/PTN/MCM8/CCNB2/NANOS3/MEIOB/IHH/AURKA/BRCA2/RAD51C/GDF9/TOP2A/SPIRE2/ZP3/NANOS2/PLD6/NPPC/ZGLP1/WEE2/CDC25B/MSH4/CCNB1/TAF4B
GOBP_LIPOSACCHARIDE_METABOLIC_PROCESS	GOBP_LIPOSACCHARIDE_METABOLIC_PROCESS	112	0.452264	1.28235	0.0294118	1	1	7380	tags=9%, list=13%, signal=8%	ST8SIA3/PNLIPRP2/GAL3ST3/GAL3ST1/GBA3/ST8SIA2/ST8SIA5/B3GALT1/ESYT3/UGT8
GOBP_MEIOTIC_CHROMOSOME_SEGREGATION	GOBP_MEIOTIC_CHROMOSOME_SEGREGATION	87	0.597425	1.69576	0.0294118	1	1	14077	tags=51%, list=25%, signal=38%	SYCP1/MOS/MAEL/TEX15/DMC1/PRDM9/FMN2/SPO11/HORMAD2/STAG3/CCNE2/SYCE2/BRIP1/EME1/SGO1/ESPL1/MEIKIN/SPATA22/NUF2/SYCP2/MEI4/MAJIN/RAD21L1/TTK/PLK1/MEIOC/TRIP13/RMI1/BUB1B/CCNE1/BUB1/SMC2/MEIOB/SGO2/FANCD2/RAD51C/TOP2A/CORT/PTTG1/HFM1/ERCC4/CENPS/SMC4/MSH4
GOBP_MITOCHONDRIAL_TRANSLATIONAL_TERMINATION	GOBP_MITOCHONDRIAL_TRANSLATIONAL_TERMINATION	89	0.497328	1.40478	0.0294118	1	1	24513	tags=80%, list=43%, signal=45%	MRPS17/MRPL9/MRPL11/MRPS24/ERAL1/MRPS23/MRPL2/MRPL53/MRPL37/MRPL36/MRPL13/MRPL50/MRPL38/MRPS18C/MRPL48/MRPS2/MRPS18B/MRPL14/MRPL33/MRPL49/DAP3/MRPL58/MRPL47/MRPL51/MRPL55/MRPL3/MRPL12/MRPS14/MRPS7/MRPS22/MRPL16/MRPL46/MRPS10/MRPL45/MRPS5/MRPS26/MRPS33/MRPL39/MRPL52/MRPL4/MRPS12/MRPL17/MRPS18A/AURKAIP1/MRPS11/MRPL57/MRPL1/CHCHD1/MRPS25/MRPL20/MRPS16/MRPL23/MRPL10/MRPS28/MRPS6/MRPL15/MRPS15/MRPL22/…
GOBP_POSITIVE_REGULATION_OF_NEURON_DIFFERENTIATION	GOBP_POSITIVE_REGULATION_OF_NEURON_DIFFERENTIATION	92	0.49632	1.38947	0.0294118	1	1	3878	tags=12%, list=7%, signal=11%	NEUROG1/NEUROD1/LIN28A/ATOH1/MMD2/ASCL1/NEUROG3/NKX2-2/PHOX2B/FEZF2/NEUROD2
GOBP_RESPONSE_TO_DOPAMINE	GOBP_RESPONSE_TO_DOPAMINE	89	0.568253	1.60511	0.0294118	1	1	6513	tags=20%, list=12%, signal=18%	OR10H3/OR10H4/HTR5A/OR10J5/HTR1A/HTR3B/HTR3A/HRH3/OR10H5/NSG2/OR10J6P/SULT1A4/HTR1D/OR10H2/DRD3/CHRM4/HTR6/OR5T2
GOBP_SYNAPTIC_TRANSMISSION_GLUTAMATERGIC	GOBP_SYNAPTIC_TRANSMISSION_GLUTAMATERGIC	89	0.47365	1.33789	0.0294118	1	1	10285	tags=24%, list=18%, signal=19%	NPS/SLC17A6/CACNG2/SLC17A8/GRM5/GRM3/NPY2R/GRIA2/DRD3/NRXN1/CNIH2/GRID2/CACNG5/CNR1/CACNG4/UNC13A/NLGN1/RELN/GRID1/OXTR/DRD2
GOCC_METHYLTRANSFERASE_COMPLEX	GOCC_METHYLTRANSFERASE_COMPLEX	96	0.507464	1.41678	0.0294118	1	1	21436	tags=58%, list=38%, signal=36%	DNMT3L/DYDC1/DYDC2/EZH2/PHF19/HDAC9/PAGR1/CBX5/TRIM37/SNRPD1/SUZ12/PAXIP1/RUVBL1/RBM15/WDR5/RBBP7/WDR5B/DPY30/E2F6/TRMT61A/MTF2/TAF6/PELP1/RBBP4/TAF4/KAT8/SENP3/HDAC2/TEX10/NCOA6/LAS1L/JARID2/SNRPB/HCFC1/RNMT/SNRPG/CXXC1/EED/TRMT6/SETD1A/TRMT61B/KDM6A/RIOK1/PRMT5/RBBP5/METTL1/ASH2L/SNRPF/PHF20/INO80C/SNRPE/PRPF31/SNRPD3/CBLL1/MEN1/ERH
GOCC_ORGANELLAR_RIBOSOME	GOCC_ORGANELLAR_RIBOSOME	87	0.506406	1.43741	0.0294118	1	1	24513	tags=82%, list=43%, signal=46%	MRPS17/MRPL9/MRPL11/MRPS24/MRPL2/MRPL53/MRPL37/MRPL36/MRPL13/MRPL50/MRPL38/MALSU1/MRPS18C/MRPL48/MRPS2/MRPS18B/C12orf65/MRPL14/MRPL33/MRPL49/DAP3/MRPL58/MRPL47/NDUFAB1/MRPL51/MRPL55/MRPL3/MRPL12/MRPS14/MRPS7/MRPS22/MRPL16/MRPL46/MRPS10/MRPL45/MRPS5/MRPS26/MRPS33/MRPL39/MRPL52/MRPL4/MRPS12/MRPL17/MRPS18A/MTG2/MRPS11/MRPL57/CHCHD1/MRPL20/MRPS16/MPV17L2/NDUFA7/MRPL23/MRPL10/MRPS28/MRPS6/MRPL15/MRPS1…
GOCC_PEPTIDASE_COMPLEX	GOCC_PEPTIDASE_COMPLEX	92	0.457591	1.28105	0.0294118	1	1	23961	tags=77%, list=42%, signal=45%	PSMA8/PSMB11/SUPT20HL2/SEC11B/PSMB9/TADA1/PSMD11/PSMA2/USP14/HTRA2/PIGU/PSMC1/TAF6/SEC11C/PSMD4/PSMB2/PSMB7/PSMB4/ENY2/RAD23B/PSMA6/UCHL5/PSMD9/PSMD10/AFG3L2/PIGK/PSMD3/UBQLN4/PIGS/PSMD2/UBQLN1/PSMC3/PSMD14/PSMA5/TAF6L/GPAA1/PIGT/RAD23A/PSMC2/TAF12/PSMB8/PSMD7/PSMA7/PSMC4/PSMD12/PSMB3/ECPAS/PSMD13/PSMA1/PSMB6/PSMA4/PSME2/PSMC5/PSMD8/PSMC6/ADRM1/PSMB5/PSMA3/PSMD5/PSMB1/TXNL1/SPCS2/PAAF1/SGF29/PSMB…
HP_ABNORMAL_PANCREAS_MORPHOLOGY	HP_ABNORMAL_PANCREAS_MORPHOLOGY	89	0.477681	1.34928	0.0294118	1	1	14846	tags=30%, list=26%, signal=22%	NEUROD1/PAX4/HNF1A/INS/CPA1/KCNJ11/PTF1A/PDX1/CASR/PRDM16/CTRC/CFTR/HNF4A/CEL/LHX1/ABCC8/RPGRIP1/FANCD2/RECQL4/CEP55/MYCN/RFX6/DZIP1L/GCK/ABCC6/TMEM107/KLF11
HP_ABNORMAL_SUBARACHNOID_SPACE_MORPHOLOGY	HP_ABNORMAL_SUBARACHNOID_SPACE_MORPHOLOGY	128	0.44121	1.2792	0.0294118	1	1	7646	tags=9%, list=14%, signal=7%	MT-TQ/CACNG2/MYT1L/CNKSR2/KIF1A/CAMK2B/BRSK2/PAK3/ITGA2B/SYP/RAB39B
HP_ABNORMALITY_OF_LATERAL_VENTRICLE	HP_ABNORMALITY_OF_LATERAL_VENTRICLE	96	0.494727	1.38122	0.0294118	1	1	11434	tags=16%, list=20%, signal=12%	DCX/CACNG2/MYT1L/KIF1A/CAMK2B/TUBB2B/BRSK2/TNFRSF11A/KCNQ5/ZIC1/EZH2/NCAPG2/GRIN1/MED12L/FANCI
HP_FOCAL_IMPAIRED_AWARENESS_SEIZURE	HP_FOCAL_IMPAIRED_AWARENESS_SEIZURE	96	0.526121	1.46887	0.0294118	1	1	12404	tags=23%, list=22%, signal=18%	GABRA1/CACNG2/HCN1/MYT1L/KIF1A/GRIN2A/SCN1A/KCNQ2/FMN2/CAMK2B/BRSK2/SCN8A/FRRS1L/KCNQ5/SCN2A/RELN/STX1B/GRIN1/MED12L/CLCN4/NHLRC1/LGI1
GOBP_HISTONE_METHYLATION	GOBP_HISTONE_METHYLATION	129	0.512646	1.4785	0.030303	1	1	19799	tags=43%, list=35%, signal=28%	GCG/CTCFL/DYDC1/SMYD1/DYDC2/PRDM7/PRDM9/MYB/PRDM14/EZHIP/PRDM16/PAX5/EZH2/PHF19/PRDM12/BRCA1/TET1/CHD5/KDM4D/DNMT3B/BEND3/NR1H4/SUV39H1/GFI1/SUV39H2/NSD2/DNMT1/PAGR1/KMT5C/COPRS/SUZ12/PAXIP1/EHMT2/WDR5/ZNF274/NTMT1/WDR5B/SETDB1/DPY30/NELFE/MTF2/EHMT1/PYGO2/JARID2/CXXC1/EED/SETD6/RNF20/SETD1A/RIF1/CHTOP/KDM6A/SETD3/PRMT5/RBBP5
GOBP_INNER_EAR_MORPHOGENESIS	GOBP_INNER_EAR_MORPHOGENESIS	90	0.487928	1.36497	0.030303	1	1	8854	tags=19%, list=16%, signal=16%	NEUROG1/ATOH1/CLRN1/PAX2/MYO3A/LHFPL5/COL2A1/HPN/POU3F4/GRXCR2/FGF8/USH1C/OTX1/USH1G/POU4F3/DLX6/ZIC1
GOBP_NEGATIVE_REGULATION_OF_CHROMOSOME_ORGANIZATION	GOBP_NEGATIVE_REGULATION_OF_CHROMOSOME_ORGANIZATION	91	0.514337	1.43209	0.030303	1	1	20023	tags=55%, list=35%, signal=36%	APOBEC1/AICDA/ESPL1/NDC80/CDT1/SLX1B/USP44/MAD2L1/PIF1/TTK/PLK1/MCM2/TRIP13/FBXO5/KNTC1/CENPF/TET1/BUB1B/AURKB/BUB1/ZWINT/TOP2A/CDC20/XRCC3/PTTG1/CDK5RAP2/ERCC4/GEN1/MAD2L2/CCNB1/SPDL1/TEX14/ACD/ZW10/MAD1L1/POT1/KLHL22/XRCC1/PARP1/RAD21/LCMT1/H3-3A/MAD2L1BP/EXOSC10/MNAT1/PTTG3P/PCID2/PSMG2/DYNC1LI1/NAA10
GOBP_NEUROMUSCULAR_PROCESS	GOBP_NEUROMUSCULAR_PROCESS	90	0.476833	1.33393	0.030303	1	1	8590	tags=20%, list=15%, signal=17%	NEUROG1/POU4F2/CLRN1/CTNNA2/GBX1/GRIN2A/KCNA1/PCDH15/POU4F1/IGDCC3/DRD3/NRXN1/GRID2/GRIN2C/USH1C/USH1G/POU4F3/GPR88
GOBP_PROTEIN_LOCALIZATION_TO_CHROMOSOME	GOBP_PROTEIN_LOCALIZATION_TO_CHROMOSOME	91	0.479743	1.33577	0.030303	1	1	22326	tags=60%, list=40%, signal=37%	SPO11/HASPIN/CENPA/TERT/NDC80/CDT1/EZH2/KNL1/TTK/PLK1/CDCA5/ESCO2/MTBP/BUB1B/AURKB/MCM8/BRCA2/CDK1/MSH2/CENPQ/SLF1/SPDL1/WRAP53/ACD/CHAMP1/ZW10/ZWILCH/RPA1/RPA2/CENPT/LRWD1/POT1/RAD21/NABP2/SMC5/DKC1/CCT5/HDAC8/CCT6A/LEMD2/MIS12/TERF2/RCC2/CTCF/CCT4/BOD1/TERF1/BUB3/CCT3/PIH1D1/RUVBL2/SPIDR/TINF2/NIPBL/MACROH2A1
GOCC_MICROVILLUS	GOCC_MICROVILLUS	91	0.544161	1.51513	0.030303	1	1	8269	tags=15%, list=15%, signal=13%	GRXCR1/CLRN1/ANKS4B/CLCA1/AQP5/VIL1/PROM1/CDHR2/PDZK1/SPEF1/GRXCR2/MYO1A/USH1C/CRB1
GOBP_NEGATIVE_REGULATION_OF_CELL_CYCLE_G1_S_PHASE_TRANSITION	GOBP_NEGATIVE_REGULATION_OF_CELL_CYCLE_G1_S_PHASE_TRANSITION	115	-0.551612	-1.46339	0.0307692	1	1	5089	tags=5%, list=9%, signal=5%	MIR638/MIR16-1/MIR26A1/MIR133B/MIR15B/MIR873
HP_TINNITUS	HP_TINNITUS	56	-0.598378	-1.48758	0.0307692	1	1	2496	tags=4%, list=4%, signal=3%	DSPP/MIR96
GOBP_BLOOD_VESSEL_ENDOTHELIAL_CELL_PROLIFERATION_INVOLVED_IN_SPROUTING_ANGIOGENESIS	GOBP_BLOOD_VESSEL_ENDOTHELIAL_CELL_PROLIFERATION_INVOLVED_IN_SPROUTING_ANGIOGENESIS	45	-0.646974	-1.51583	0.03125	1	1	10498	tags=36%, list=19%, signal=29%	MIR27B/MIR132/MIR10B/MIR483/MIR23A/AGTR1/MIR27A/MIR222/MIR101-1/MIR2355/MIR16-1/MIR487B/MIR26A1/MIR361/MIR495/MIR15B
GOBP_CELL_FATE_SPECIFICATION	GOBP_CELL_FATE_SPECIFICATION	88	0.60134	1.68703	0.03125	1	1	5195	tags=20%, list=9%, signal=19%	LHX3/GSX2/ATOH1/OLIG3/SOX1/FEV/MYT1L/PAX2/POU3F2/ASCL1/DBX1/NKX2-2/MESP1/FOXA2/TBXT/TBX10/PRDM14/POU4F1
GOBP_CILIARY_BASAL_BODY_PLASMA_MEMBRANE_DOCKING	GOBP_CILIARY_BASAL_BODY_PLASMA_MEMBRANE_DOCKING	94	0.522196	1.44337	0.03125	1	1	21651	tags=64%, list=38%, signal=39%	TUBB4A/KIF24/NEK2/PLK1/PLK4/CEP78/CEP72/HAUS5/CEP76/CEP152/HAUS7/FBF1/CDK1/NINL/HAUS8/NDE1/CCP110/HAUS6/CENPJ/CDK5RAP2/CEP131/CNTRL/HAUS1/CEP89/RAB3IP/PRKAR2B/CEP70/CEP250/ALMS1/HAUS4/TCTN2/ODF2/SCLT1/IQCB1/MKS1/TUBG1/CEP97/CEP192/NPHP1/DCTN3/C2CD3/HAUS2/CEP57/RPGRIP1L/TUBB/CKAP5/CETN2/CEP135/B9D1/PCNT/CC2D2A/SSNA1/TUBB4B/NEDD1/TUBA1A/MAPRE1/CEP63/NPHP4/CEP83/DCTN1
GOBP_DIGESTION	GOBP_DIGESTION	138	0.516079	1.50724	0.03125	1	1	10382	tags=29%, list=18%, signal=24%	NEUROG1/PNLIP/NEUROD1/SI/PNLIPRP2/CCKBR/CTRB1/CTRB2/OPRK1/PGA4/UCN3/APOA4/AQP5/VIL1/CLPSL2/LCT/MUC6/DRD3/CRACD/NMU/AKR1D1/FABP2/MUC4/AMY2A/CHRM5/TAC1/SOAT2/WNK4/GHSR/PRSS3/FABP1/PGC/SLC9A4/MUC13/ABCG8/OXTR/CLPS/ALPI/CEL/APOA5
GOBP_HINDBRAIN_DEVELOPMENT	GOBP_HINDBRAIN_DEVELOPMENT	139	0.428382	1.25858	0.03125	1	1	10912	tags=18%, list=19%, signal=15%	NEUROD1/GSX2/KLHL1/ASCL1/NEUROG3/CTNNA2/SEZ6/PHOX2B/NEUROD2/POU4F1/PTF1A/PHOX2A/GRID2/OTX1/NANOS1/CDK5R2/CDK5R1/NOG/EZH2/PTN/KIF14/LHX1/GBX2/GPR37L1/PROX1
GOBP_MICROTUBULE_ORGANIZING_CENTER_ORGANIZATION	GOBP_MICROTUBULE_ORGANIZING_CENTER_ORGANIZATION	139	0.501558	1.47357	0.03125	1	1	15938	tags=42%, list=28%, signal=30%	CETN1/DEUP1/MCIDAS/WDR62/HEPACAM2/SGO1/NEK2/XRCC2/CNTLN/NDC80/STIL/CHEK1/PLK1/PLK4/BRCA1/C10orf90/PCLAF/CEP72/AURKA/SASS6/KIF11/CCNF/SSX2IP/BRCA2/HAUS5/PARD6A/CEP76/CEP152/HAUS7/SAC3D1/CDK1/XRCC3/HAUS8/CDK2/CEP85/NDE1/CCP110/HAUS6/CENPJ/CDK5RAP2/SLC16A1/CEP131/GEN1/FOXJ1/HAUS1/RAB6C/KIF25/RTTN/PARD6B/CEP250/SPICE1/ALMS1/TRIM37/HAUS4/ODF2/MDM1/NUBP1/RANBP1
GOBP_NUCLEOSOME_ASSEMBLY	GOBP_NUCLEOSOME_ASSEMBLY	141	0.46903	1.37613	0.03125	1	1	14889	tags=45%, list=26%, signal=34%	TSPY4/H2AB2/H2BC1/H4C7/H2AB3/TSPY10/H1-8/H2AB1/TSPY1/H4C14/H4C15/TSPY3/H2BC17/H1-6/H2BC11/H2BW2/H3C8/H2BW1/CHAF1B/H4C12/OIP5/CENPI/CENPA/SETSIP/H3C15/CENPK/KNL1/H2BC19P/MCM2/NAP1L6P/H3C10/CENPL/CENPU/H4C9/ASF1B/CENPP/HJURP/H4C8/CENPO/H2BC15/H3C12/CENPN/H2BS1/CENPM/H2BU1/ITGB3BP/CENPQ/HMGB2/H2BC21/H2BC4/CENPW/CENPH/NASP/TSPY26P/H2BC12/CENPS/CHAF1A/MIS18A/TSPYL6/H1-3/H3C4/H2BC8/H2BC5/SOX9
GOBP_RECOMBINATIONAL_REPAIR	GOBP_RECOMBINATIONAL_REPAIR	139	0.525425	1.54369	0.03125	1	1	19797	tags=60%, list=35%, signal=39%	TEX15/DMC1/OOEP/RMI2/RAD54L/XRCC2/FANCB/RAD51AP1/GINS2/CHEK1/CDC7/POLQ/SLX1B/GINS4/RAD21L1/CDC45/MCM2/HROB/AUNIP/RMI1/RAD51/BRCA1/MMS22L/FIGNL1/MCM8/BLM/KDM4D/MEIOB/RAD51AP2/RECQL4/FEN1/RPA3/BRCA2/RAD51C/MCM6/XRCC3/PARPBP/MCM5/TIMELESS/USP51/TONSL/ERCC4/CGAS/GEN1/MCM4/MAD2L2/RAD51D/MCM7/PALB2/SMC6/FANCM/RNF138/RFWD3/MCM3/H2AX/WRAP53/RAD54B/SWI5/RHNO1/SHLD1/SMCHD1/RPA1/SAMHD1/RPA2/MAGEF1/LIG3/RECQ…
GOBP_REGULATION_OF_CHROMOSOME_SEGREGATION	GOBP_REGULATION_OF_CHROMOSOME_SEGREGATION	88	0.567244	1.59137	0.03125	1	1	15596	tags=45%, list=28%, signal=33%	UBE2DNL/MOS/RMI2/KIF2B/ESPL1/NDC80/CDT1/USP44/MAD2L1/TTK/PLK1/TRIP13/CDC6/FBXO5/KNTC1/CENPF/DLGAP5/BUB1B/MAGEA10-MAGEA5/KIF2C/AURKB/BUB1/RAD18/MKI67/CENPE/ZWINT/MAGEA5/CDC20/UBE2C/XRCC3/PTTG1/CDK5RAP2/GEN1/MAD2L2/TACC3/CCNB1/SPDL1/SMC6/HORMAD1/TEX14
GOBP_RNA_EXPORT_FROM_NUCLEUS	GOBP_RNA_EXPORT_FROM_NUCLEUS	142	0.433963	1.27924	0.03125	1	1	24052	tags=69%, list=43%, signal=40%	NXF2B/NXF5/DDX25/POM121L12/NUP62CL/POM121L2/NUP210/NXF2/NUP155/MAGOHB/THOC1/NUP188/NUP85/SEH1L/UPF3B/ALYREF/CPSF4/NDC1/NUP214/GLE1/SLBP/XPO5/NUP205/NUP93/NCBP1/NUP160/EIF4A3/CPSF3/NUP107/POLR2D/FIP1L1/NXT1/NUP153/RBM8A/MAGOH/ENY2/NUP37/DDX39A/LSG1/UPF2/NUP54/SMG5/THOC5/NUP62/RAE1/NUP35/SEC13/CHTOP/HHEX/RNPS1/PCID2/TSC1/NSUN2/U2AF1L4/DDX19A/CPSF1/CASC3/CPSF2/NUP88/RAN/NUP133/XPOT/NUP58/KHDRBS1/DHX…
GOCC_CENTRIOLE	GOCC_CENTRIOLE	136	0.459957	1.3415	0.03125	1	1	17899	tags=42%, list=32%, signal=29%	CETN1/DEUP1/AGBL4/FTCD/WDR62/KIF24/CNTLN/TEDC2/STIL/PLK1/PLK4/CEP78/SAXO1/C10orf90/CEP128/POC1A/LRRCC1/CCHCR1/AURKA/SASS6/HYLS1/CEP55/CCNF/CEP76/CEP152/TOP2A/TEDC1/FBF1/HAP1/CCP110/CEP19/CENPJ/MPHOSPH9/DZIP1L/TCP10L/TUBD1/CEP89/TUBGCP3/WDR90/RTTN/CCSAP/CEP250/SPICE1/ALMS1/ODF2/SCLT1/MDM1/NUBP1/HSPA6/IQCB1/GLE1/CEP192/WRAP73/IFT52/C2CD3/CEP295/SAXO2
GOCC_INTRINSIC_COMPONENT_OF_SYNAPTIC_MEMBRANE	GOCC_INTRINSIC_COMPONENT_OF_SYNAPTIC_MEMBRANE	140	0.497036	1.46176	0.03125	1	1	11335	tags=31%, list=20%, signal=25%	CACNG2/HTR5A/SLC6A5/GABRA5/CDH9/SHISA9/SLITRK1/HTR3A/GABRA4/PCDH8/GABRB2/SORCS3/GRM3/DCC/GRIN2A/GABRG3/KCNA1/CSPG5/KCNJ3/SYT6/SLC1A2/DRD3/ERBB4/CNIH2/GRID2/PTPRT/CACNG5/CNR1/CACNG4/CPLX3/SLITRK2/ADCY8/GHSR/NLGN1/SCN2A/GRID1/CDH10/CNTN6/ADAM22/DRD2/CNTN5/NETO1/ADCY1/LRFN2
GOCC_KINETOCHORE	GOCC_KINETOCHORE	137	0.56398	1.64138	0.03125	1	1	18654	tags=58%, list=33%, signal=39%	BOD1L2/KIF2B/SGO1/CENPI/CENPA/NEK2/KIF18A/SPC25/MEIKIN/NUF2/NDC80/CDT1/CENPK/SKA1/KNL1/MAD2L1/TTK/PLK1/SPC24/SKA3/ERCC6L/KNTC1/CENPU/MTBP/CENPF/BUB1B/KIF2C/AURKB/BUB1/HJURP/SPAG5/BIRC5/CENPO/DSN1/SGO2/CENPE/ZWINT/CENPN/CENPM/KNSTRN/ITGB3BP/CENPQ/CENPW/INCENP/CENPH/NDE1/KIF22/CENPS/SKA2/CCNB1/SPDL1/CBX5/NUP85/SEH1L/MIS18BP1/TEX14/SMC1A/CENPV/CHAMP1/ZW10/ZWILCH/CENPX/PMF1/SEPTIN6/MAD1L1/SPOUT1/NSL1…
GOCC_PRESYNAPTIC_MEMBRANE	GOCC_PRESYNAPTIC_MEMBRANE	137	0.45659	1.32883	0.03125	1	1	11260	tags=26%, list=20%, signal=21%	GAD2/SLC6A5/KCNC1/GABRA5/CDH9/HTR3A/PCDH8/KCNC2/GRM3/GRIN2A/KCNA1/KCNJ3/SLC1A2/CNTNAP4/NRXN1/ERBB4/CNR1/RIMS1/SYP/CPLX3/STX19/UNC13A/ADCY8/SCN2A/CDH10/STX1B/SLC4A8/SNAP25/SNAP91/CNTN6/DRD2/CNTN5/RIMS3/KCTD8/KCNA2
HP_ABNORMALITY_OF_PANCREAS_PHYSIOLOGY	HP_ABNORMALITY_OF_PANCREAS_PHYSIOLOGY	142	0.441935	1.30274	0.03125	1	1	10762	tags=13%, list=19%, signal=10%	MT-TQ/NEUROD1/PAX4/HNF1A/INS/CDKN2A/CPA1/KCNJ11/PDX1/CASR/CDKN2B/CTRC/CFTR/HNF4A/BRCA1/CEL/CDKN2C/ABCC8
HP_FOCAL_T2_HYPERINTENSE_BASAL_GANGLIA_LESION	HP_FOCAL_T2_HYPERINTENSE_BASAL_GANGLIA_LESION	44	-0.646066	-1.50658	0.03125	1	1	5582	tags=7%, list=10%, signal=6%	MT-TV/MT-TW/MT-TK
HP_WIDENED_SUBARACHNOID_SPACE	HP_WIDENED_SUBARACHNOID_SPACE	94	0.509145	1.4073	0.03125	1	1	7646	tags=11%, list=14%, signal=9%	MT-TQ/CACNG2/MYT1L/CNKSR2/KIF1A/CAMK2B/BRSK2/PAK3/SYP/RAB39B
GOBP_NEGATIVE_REGULATION_OF_I_KAPPAB_KINASE_NF_KAPPAB_SIGNALING	GOBP_NEGATIVE_REGULATION_OF_I_KAPPAB_KINASE_NF_KAPPAB_SIGNALING	46	-0.630197	-1.4847	0.031746	1	1	5010	tags=11%, list=9%, signal=10%	PPM1N/TNIP3/NLRP12/MIR16-1/MIR15B
GOBP_MITOCHONDRIAL_TRANSLATION	GOBP_MITOCHONDRIAL_TRANSLATION	134	0.491814	1.42704	0.0322581	1	1	25193	tags=81%, list=45%, signal=45%	MRPS17/MRPL9/FASTKD3/MRPL11/TARS2/MRPS24/TRUB2/DARS2/ERAL1/MRPS23/TACO1/CDK5RAP1/MRPL2/QRSL1/MRPL53/MRPL37/MRPL36/MRPL13/UQCC2/MRPL50/AARS2/MRPL38/MALSU1/MRPS18C/MRPL48/MRPS2/MRPS18B/MRPL14/TSFM/ALKBH1/MRPL33/RPUSD3/MRPL49/DAP3/MRPL58/MRPL47/MRPL51/MRPL55/MRPL3/MRPL12/MRPS14/GATC/MRPS7/MRPS22/MRPL16/MRPL46/MRPS10/COA3/MRPL45/MRPS5/MRPS26/EARS2/RPUSD4/MRPS33/MRPL39/GFM1/MRPL52/MRPL4/MRPS12/MRPL17/…
GOBP_NEGATIVE_REGULATION_OF_AMYLOID_PRECURSOR_PROTEIN_CATABOLIC_PROCESS	GOBP_NEGATIVE_REGULATION_OF_AMYLOID_PRECURSOR_PROTEIN_CATABOLIC_PROCESS	29	-0.689798	-1.50896	0.0322581	1	1	3924	tags=10%, list=7%, signal=10%	MIR361/MIR107/MIR15B
GOBP_NEURON_MIGRATION	GOBP_NEURON_MIGRATION	145	0.503863	1.48566	0.0322581	1	1	11693	tags=23%, list=21%, signal=19%	DCX/ATOH1/OLIG3/SOX1/BARHL1/SCRT2/SOX14/ASCL1/DRGX/CTNNA2/SCRT1/PHOX2B/FEZF2/DCC/ASTN1/CAMK2B/NEXMIF/TUBB2B/ERBB4/KIAA0319/CDK5R2/CDK5R1/GFRA3/RELN/TLX3/DNER/FEZF1/DRD2/NKX2-1/LHX1/BARHL2/NRCAM/SRGAP2C/NKX6-1
GOBP_REGULATION_OF_NUCLEAR_DIVISION	GOBP_REGULATION_OF_NUCLEAR_DIVISION	134	0.505049	1.46544	0.0322581	1	1	14509	tags=40%, list=26%, signal=29%	MOS/PSMA8/STRA8/INS/PRDM7/PRDM9/DMRT1/DRD3/OOEP/FBXO43/PIWIL2/FGF8/CDC25C/NEK2/ESPL1/RAD51AP1/NDC80/CHEK1/PKMYT1/CDT1/USP44/MAD2L1/TTK/PLK1/TRIP13/PDXP/FBXO5/KNTC1/MTBP/CENPF/DLGAP5/BUB1B/AURKB/BUB1/NUSAP1/MKI67/ZWINT/AURKA/BORA/CDC20/XRCC3/EGF/NANOS2/CDK5RAP2/SMPD3/GEN1/KIF20B/GPR3/WEE2/MAD2L2/RAD1/CCNB1/SPDL1
GOBP_RETINA_DEVELOPMENT_IN_CAMERA_TYPE_EYE	GOBP_RETINA_DEVELOPMENT_IN_CAMERA_TYPE_EYE	145	0.458523	1.35197	0.0322581	1	1	11451	tags=19%, list=20%, signal=15%	NEUROD1/DCX/POU4F2/HCN1/FOXN4/PAX2/NEUROD4/SLC17A8/CELF4/PROM1/ATOH7/DSCAM/RHO/PTF1A/NR2E1/USH1C/CRB1/DLX2/GNAT1/SIX3/PTN/HPCA/LHX1/RPGRIP1/PROX1/LAMA1/IHH/PRPH2
GOBP_STRIATED_MUSCLE_CELL_PROLIFERATION	GOBP_STRIATED_MUSCLE_CELL_PROLIFERATION	71	-0.609671	-1.55324	0.0322581	1	1	2409	tags=13%, list=4%, signal=12%	MIR199B/MEGF10/MSTN/SHH/MIR222/MIR548C/MIR1-1/MIR509-1/MIR873
HP_DEVELOPMENTAL_CATARACT	HP_DEVELOPMENTAL_CATARACT	134	0.529264	1.53571	0.0322581	1	1	3986	tags=5%, list=7%, signal=5%	MIR184/MT-TQ/KCNA4/GJA8/CRYGB/CRYBA2/MIR204
GOBP_NEGATIVE_REGULATION_OF_MUSCLE_CELL_DIFFERENTIATION	GOBP_NEGATIVE_REGULATION_OF_MUSCLE_CELL_DIFFERENTIATION	63	-0.592268	-1.43594	0.0327869	1	1	185	tags=27%, list=0%, signal=27%	BMP2/MIR199A1/HEY2/IGF2/MIR590/PI16/MYOCD/ZBED6/PRDM6/MIR221/TRIM72/MIR199B/SHH/MIR222/MIR26A1/MIR15B/MIR100
GOBP_CALCIUM_ION_EXPORT	GOBP_CALCIUM_ION_EXPORT	11	-0.858248	-1.54552	0.0333333	1	1	389	tags=18%, list=1%, signal=18%	SLC8A2/MIR1-1
GOBP_CELLULAR_RESPONSE_TO_LIPOPROTEIN_PARTICLE_STIMULUS	GOBP_CELLULAR_RESPONSE_TO_LIPOPROTEIN_PARTICLE_STIMULUS	32	-0.680657	-1.5233	0.0333333	1	1	53	tags=9%, list=0%, signal=9%	CES1/MIR302A/MIR758
GOBP_CHROMOSOME_SEPARATION	GOBP_CHROMOSOME_SEPARATION	95	0.548318	1.494	0.0333333	1	1	18318	tags=55%, list=32%, signal=37%	UBE2DNL/MOS/EME1/ESPL1/NDC80/CDT1/USP44/MAD2L1/TTK/PLK1/TRIP13/RMI1/CDC6/FBXO5/KNTC1/CENPF/DLGAP5/BUB1B/AURKB/BUB1/MEIOB/CENPE/ZWINT/TOP2A/CDC20/UBE2C/XRCC3/CORT/PTTG1/CDK5RAP2/HFM1/ERCC4/GEN1/CENPS/MAD2L2/TOP3A/MSH4/TACC3/CCNB1/SPDL1/FANCM/TEX14/ZW10/CENPX/MAD1L1/NCAPH2/ANAPC11/RECQL5/KLHL22/PLSCR1/RAD21/LCMT1
GOBP_DNA_DEPENDENT_DNA_REPLICATION	GOBP_DNA_DEPENDENT_DNA_REPLICATION	157	0.532645	1.64212	0.0333333	1	1	17611	tags=55%, list=31%, signal=38%	KHDC3L/AICDA/OOEP/CCNE2/EME1/E2F7/MCM10/ORC1/POLE2/TICRR/PRIM1/GINS2/CDT1/CDC7/POLQ/GINS1/GINS4/CDC45/MCM2/WDHD1/DSCC1/TRAIP/RAD51/CDC6/ORC6/FBXO5/MMS22L/RFC4/E2F8/CCNE1/BLM/DNA2/DONSON/GINS3/SLFN11/DBF4B/RECQL4/ZGRF1/FEN1/POLE/PRIM2/RPA3/BRCA2/TIPIN/RFC3/POLA1/POLA2/MCM6/CHTF18/MCM5/METTL4/CORT/DBF4/TIMELESS/GMNN/TOPBP1/TONSL/POLD1/GEN1/RFC5/CENPS/POLD3/MCM4/DDX11/PCNA/RFC2/MCM7/LIG1/THOC1/FANCM…
GOBP_MITOTIC_CELL_CYCLE_CHECKPOINT	GOBP_MITOTIC_CELL_CYCLE_CHECKPOINT	158	0.443748	1.36927	0.0333333	1	1	20546	tags=54%, list=36%, signal=35%	STK33/RAD9B/CLSPN/CDC25C/EME1/E2F1/E2F7/ORC1/TICRR/NDC80/CHEK1/CDT1/USP44/MAD2L1/TTK/PLK1/TRIP13/CDC6/KNTC1/BRCA1/CENPF/BUB1B/E2F8/AURKB/BUB1/GTSE1/BLM/DONSON/MDC1/FANCD2/ZWINT/AURKA/DCLRE1B/TIPIN/CDC20/CDK1/XRCC3/MSH2/CDK2/TOPBP1/CDK5RAP2/GEN1/WEE2/MAD2L2/PCNA/CCNB1/SPDL1/RFWD3/PIDD1/TEX14/CHEK2/ZW10/CASP2/ZWILCH/BRSK1/MAD1L1/RPA2/TFDP1/ZFYVE19/RAD9A/TRIM39/CDKN1B/CNOT10/MUC1/TFDP2/KLHL22/WEE1/P…
GOBP_MITOTIC_SISTER_CHROMATID_SEGREGATION	GOBP_MITOTIC_SISTER_CHROMATID_SEGREGATION	164	0.515193	1.60807	0.0333333	1	1	18596	tags=52%, list=33%, signal=35%	UBE2DNL/SMC1B/HASPIN/SGO1/NEK2/ESPL1/KIF18A/NUF2/NDC80/CDT1/CENPK/KIF18B/USP44/RAD21L1/MAD2L1/TTK/PLK1/CDCA5/KIFC1/KIF4B/DSCC1/TRIP13/CDC6/KIF4A/FBXO5/KNTC1/NCAPG2/NCAPH/NCAPG/CENPF/DLGAP5/PSRC1/KIF14/BUB1B/KIF2C/AURKB/BUB1/CDCA8/SPAG5/SMC2/KIF23/PRC1/DSN1/NUSAP1/SGO2/CENPE/ZWINT/KNSTRN/RACGAP1/CDC20/UBE2C/XRCC3/INCENP/PTTG1/NCAPD3/SLF1/CDK5RAP2/KIF22/GEN1/SMC4/MAD2L2/KIF25/TACC3/CCNB1/SPDL1/NCAP…
GOBP_MRNA_TRANSPORT	GOBP_MRNA_TRANSPORT	151	0.432346	1.29376	0.0333333	1	1	24031	tags=68%, list=43%, signal=39%	NXF2B/LUZP4/NXF5/DDX25/IGF2BP3/NUP210/NXF2/IGF2BP2/KIF5C/RANBP17/IGF2BP1/NUP155/MAGOHB/THOC1/NUP188/NUP85/SEH1L/UPF3B/ALYREF/CPSF4/NDC1/NUP214/GLE1/SENP2/FMR1/NXT2/SLBP/NUP205/NUP93/NCBP1/NUP160/EIF4A3/CPSF3/NUP107/POLR2D/UPF3A/FIP1L1/NXT1/NUP153/RBM8A/MAGOH/ENY2/NUP37/DDX39A/UPF2/NUP54/SMG5/THOC5/NUP62/CETN2/RAE1/NUP35/SEC13/CHTOP/HHEX/NPIPA1/RNPS1/PCID2/NSUN2/U2AF1L4/DDX19A/CPSF1/CASC3/CPSF2/NU…
GOBP_POSITIVE_REGULATION_OF_PEPTIDE_HORMONE_SECRETION	GOBP_POSITIVE_REGULATION_OF_PEPTIDE_HORMONE_SECRETION	95	0.46296	1.26143	0.0333333	1	1	15061	tags=28%, list=27%, signal=21%	GCG/GHRH/TRH/UCN3/NR0B2/INS/NMU/FFAR1/PDX1/CASR/ADCY8/ISL1/CFTR/CLTRN/DRD2/OXCT1/SLC30A8/NKX6-1/NR1H4/GIP/RASL10B/RFX6/GCK/RBP4/GRP/SCT/UCN
GOCC_MITOTIC_SPINDLE	GOCC_MITOTIC_SPINDLE	157	0.428349	1.32058	0.0333333	1	1	18201	tags=44%, list=32%, signal=30%	NEXMIF/DCDC1/KIF2B/HEPACAM2/FAM161A/ESPL1/KIF18A/CDC7/KIF18B/CKAP2L/SKA1/IL17RB/MAD2L1/ASPM/PLK1/KIFC1/SKA3/CDC6/GPSM2/AURKB/ECT2/SPAG5/TPX2/KIF23/PRC1/NUSAP1/CENPE/AURKA/KIF11/HAUS5/KNSTRN/RACGAP1/HAUS7/CDK1/FAM83D/HAUS8/HAUS6/CDK5RAP2/KIF22/KIF20B/CNTRL/HAUS1/TACC3/OR2A4/CCSAP/SMC6/HAUS4/HNF4G/PHLPP2/SMC1A/PYCR3/AGBL5/IQCB1/STAG2/MAD1L1/TUBG1/SPOUT1/WRAP73/SMC3/EPB41/TFDP2/CEP295/STAG1/KATNA1/K…
GOCC_NON_MOTILE_CILIUM	GOCC_NON_MOTILE_CILIUM	157	0.408955	1.26079	0.0333333	1	1	14060	tags=25%, list=25%, signal=19%	GRXCR1/GRK1/CETN1/KNCN/USH2A/NPY2R/PROM1/PCDH15/TTLL6/RGR/PDE6H/RHO/RGS9BP/MCHR1/USH1C/GPR83/USH1G/CRB1/GUCA1A/FAM161A/GNAT1/DRD2/GNAT3/GRK7/RPGRIP1/PRPH2/IFT122/HYLS1/MYO7A/SSTR3/GUCY2F/C1orf115/RP1/PDE6A/CNGB1/KIAA1549/OPN3/CEP89/RRH/RD3
GOCC_SPINDLE_POLE	GOCC_SPINDLE_POLE	162	0.467338	1.46014	0.0333333	1	1	21783	tags=61%, list=39%, signal=38%	CETN1/BOD1L2/WDR62/SGO1/FAM161A/NEK2/CKAP2L/MAD2L1/ASPM/PLK1/AUNIP/PLK4/CDC6/KNTC1/CENPF/DLGAP5/PSRC1/GPSM2/AURKB/DNAAF1/CEP128/POC1A/SPAG5/TPX2/PRC1/AURKA/KIF11/KNSTRN/FBF1/UMOD/CDC20/FAM83D/HAUS8/CEP85/NDE1/TOPBP1/CEP19/CDK5RAP2/KIF20B/KATNAL2/CNTRL/HAUS1/CDC25B/CEP89/TUBGCP3/DDX11/TACC3/CCNB1/OR2A4/SPDL1/BRCC3/SMC6/TMEM201/ALMS1/ODF2/SMC1A/ZW10/TBCCD1/STAG2/MAD1L1/TUBG1/CKAP2/KATNAL1/SPOUT1/PL…
GOMF_HELICASE_ACTIVITY	GOMF_HELICASE_ACTIVITY	157	0.467073	1.43997	0.0333333	1	1	22054	tags=57%, list=39%, signal=35%	DDX4/DDX25/TDRD9/DDX11L8/BRIP1/TDRD12/RAD54L/POLQ/PIF1/MCM2/DSCC1/DDX53/RAD51/ERCC6L/HELLS/RFC4/MCM8/BLM/DNA2/CHD5/SLFN11/DDX12P/RECQL4/ZGRF1/DDX43/RFC3/MCM6/CHTF18/NAV2/MCM5/HFM1/RFC5/MCM4/DDX11/RFC2/MCM7/SMC6/FANCM/MCM3/RAD54B/HLTF/DDX31/RUVBL1/TTF2/MOV10/DDX58/RECQL5/DHX35/EIF4A3/DDX20/DDX39A/WRNIP1/MRE11/DHX16/DDX28/DDX55/IFIH1/CHD1L/DHX40/DDX10/DDX19A/DDX52/DDX49/DDX27/ERCC3/CHD7/DDX59/CHTF8…
HP_ASTIGMATISM	HP_ASTIGMATISM	158	0.48311	1.49073	0.0333333	1	1	15320	tags=27%, list=27%, signal=19%	MIR184/CLRN1/ACTL6B/MYT1L/CLDN19/NEUROD2/CHST6/BRIP1/FANCA/XRCC2/FANCB/FANCC/DOCK3/RAD51/CEP78/BRCA1/FANCE/FANCI/FANCD2/KIF11/UBE2T/BRCA2/RAD51C/FANCG/VSX1/TBC1D7/MAG/LMX1B/ERCC4/OVOL2/CCDC28B/GLRB/MAD2L2/GPR143/LOXL3/SLC39A8/PALB2/FANCM/RFWD3/TUB/TRIM37/PITX2
HP_INCOMPLETE_PENETRANCE	HP_INCOMPLETE_PENETRANCE	150	0.413333	1.23729	0.0333333	1	1	9909	tags=15%, list=18%, signal=12%	DCX/GJA8/HCN1/PROKR2/CFC1/PAX2/TM4SF20/NR5A1/DCC/GRIN2A/FGF23/NEXMIF/GREB1L/SCN4A/MNX1/ANO3/TERT/FOXE3/RELN/ELOVL4/RAD51/SIX3
GOBP_DNA_INTEGRITY_CHECKPOINT	GOBP_DNA_INTEGRITY_CHECKPOINT	155	0.423198	1.29361	0.0344828	1	1	21877	tags=54%, list=39%, signal=33%	STK33/RAD9B/BRIP1/CLSPN/CDC25C/EME1/E2F1/WDR76/E2F7/ORC1/DTL/TICRR/CHEK1/CDT1/CDC45/PLK1/CDC6/BRCA1/E2F8/GTSE1/BLM/DNA2/DONSON/MDC1/FANCD2/AURKA/TIPIN/CDK1/MSH2/CDK2/TIMELESS/TOPBP1/RAD1/PCNA/CCNB1/THOC1/BRCC3/RFWD3/H2AX/PIDD1/CHEK2/HINFP/CASP2/RHNO1/BRSK1/RPA2/TFDP1/INTS7/RAD9A/TRIM39/CDKN1B/CNOT10/MUC1/CDC5L/TFDP2/FBXO4/NEK11/PLAGL1/MRE11/THOC5/BABAM1/USP28/ZNF830/NAE1/BAX/DOT1L/FOXO4/PRKDC/SOX…
GOBP_MITOCHONDRIAL_GENE_EXPRESSION	GOBP_MITOCHONDRIAL_GENE_EXPRESSION	165	0.435355	1.34697	0.0344828	1	1	25193	tags=77%, list=45%, signal=43%	METTL4/MRPS17/MRPL9/TEFM/SLC25A33/FASTKD3/MRPL11/TARS2/MRPS24/TRUB2/DARS2/ERAL1/MRPS23/TACO1/CDK5RAP1/MRPL2/QRSL1/MRPL53/MRPL37/MRPL36/MRPL13/UQCC2/MRPL50/AARS2/MRPL38/MALSU1/MRPS18C/MRPL48/MRPS2/MRPS18B/MRPL14/TSFM/ALKBH1/MRPL33/TRMT61B/RPUSD3/MRPL49/DAP3/MRPL58/MRPL47/MRPL51/MRPL55/MRPL3/MRPL12/MRPS14/GATC/MRPS7/MRPS22/MRPL16/MRPL46/MRPS10/COA3/MRPL45/MRPS5/MRPS26/EARS2/RPUSD4/MRPS33/MRPL39/GFM…
GOBP_NEGATIVE_REGULATION_OF_VASCULAR_ENDOTHELIAL_GROWTH_FACTOR_PRODUCTION	GOBP_NEGATIVE_REGULATION_OF_VASCULAR_ENDOTHELIAL_GROWTH_FACTOR_PRODUCTION	19	-0.784237	-1.57472	0.0344828	1	1	8218	tags=53%, list=15%, signal=45%	MIR134/MIR302D/MIR147A/MIR16-1/MIR520H/MIR361/MIR107/MIR373/MIR520G/MIR15B
GOBP_PALLIUM_DEVELOPMENT	GOBP_PALLIUM_DEVELOPMENT	153	0.477905	1.43849	0.0344828	1	1	15890	tags=32%, list=28%, signal=23%	NEUROD6/NEUROD1/SLC32A1/ATOH1/HTR5A/POU3F2/ASCL1/FEZF2/KCNA1/CNTNAP2/HTR6/NR2E1/FGF8/WDR62/CDK5R2/POU3F3/CDK5R1/PAX5/ANXA3/EZH2/DLX2/RELN/DMRTA2/NKX2-1/KIF14/PROX1/HSD3B1/SRGAP2C/HSD3B2/DAB1/IGF2BP1/SRD5A1/NDE1/WNT3A/CDON/SYNE2/SRGAP2/TACC3/FGF13/FBXO45/NPY/SCT/H2AX/FOXG1/CCDC85C/PLXNA3/KIRREL3/TMEM14B/PHACTR1
GOBP_PROTEIN_METHYLATION	GOBP_PROTEIN_METHYLATION	167	0.459203	1.41597	0.0344828	1	1	22117	tags=53%, list=39%, signal=33%	GCG/CTCFL/DYDC1/SMYD1/DYDC2/PRDM7/PRDM9/MYB/PRDM14/EZHIP/PRDM16/PAX5/EZH2/PHF19/PRDM12/BRCA1/TET1/BHMT/CHD5/KDM4D/DNMT3B/BEND3/NR1H4/SUV39H1/GFI1/SUV39H2/NSD2/DNMT1/METTL18/METTL22/PAGR1/KMT5C/COPRS/SUZ12/PAXIP1/METTL21A/EHMT2/WDR5/ZNF274/NTMT1/METTL11B/WDR5B/SETDB1/DPY30/NELFE/MTF2/EHMT1/PYGO2/LCMT1/JARID2/SNRPB/CXXC1/EED/SETD6/RNF20/SETD1A/PCMT1/RIF1/CHTOP/KDM6A/GSPT1/SETD3/PRMT5/RBBP5/EEF1AKMT…
GOBP_RNA_3_END_PROCESSING	GOBP_RNA_3_END_PROCESSING	153	0.495616	1.49179	0.0344828	1	1	23946	tags=71%, list=42%, signal=41%	CT45A9/LIN28A/SAGE2P/CT45A1/LIN28B/CT45A10/CPSF4L/SAGE1/BARD1/EXOSC2/MAGOHB/CCNB1/THOC1/EXOSC3/CT45A3/CSTF2/EXOSC9/UPF3B/ALYREF/CPSF4/ERI2/ZNF473/ELAC1/INTS7/NELFE/SLBP/NCBP1/EIF4A3/CPSF3/TENT4A/POLR3K/POLR2D/FIP1L1/TUT1/RBM8A/MAGOH/CLP1/SNRPA/PABPC1L/DDX39A/DKC1/EXOSC5/INTS2/ERI3/RNF20/THOC5/RPRD1B/NUDT21/EXOSC10/EXOSC8/PARN/CHTOP/TOE1/MTPAP/SSU72/RNPS1/INTS12/RPRD2/U2AF1L4/PTCD1/CPSF1/CASC3/CPS…
GOBP_SPERMATID_DIFFERENTIATION	GOBP_SPERMATID_DIFFERENTIATION	161	0.461673	1.43144	0.0344828	1	1	13871	tags=35%, list=25%, signal=26%	SYCP1/H2BC1/FAM9A/ADAD1/FAM9B/BSPH1/SLC26A3/CFAP65/OCA2/ZPBP2/DDX25/DMC1/SPINK2/SPO11/CATSPERD/MEIG1/SPEM1/SEMG1/ROPN1/SPACA1/FAM9C/TOPAZ1/TXNDC8/TCP11/PDILT/BRIP1/CCDC63/SUN5/SOX30/ROPN1B/IQCF1/SPANXB1/DPY19L2P2/CFAP43/CFTR/KNL1/MEIOC/TRIP13/CFAP97D1/TCP11X1/SPEF2/STRBP/CHD5/ROPN1L/FANCG/CATSPERZ/HOOK1/HMGB2/GALNTL5/TTC26/PLD6/ZMYND15/CEP131/CFAP157/RSPH1/ACRBP
GOCC_CLUSTER_OF_ACTIN_BASED_CELL_PROJECTIONS	GOCC_CLUSTER_OF_ACTIN_BASED_CELL_PROJECTIONS	156	0.498856	1.52795	0.0344828	1	1	10428	tags=21%, list=18%, signal=17%	GRXCR1/SI/CLRN1/ANKS4B/SLC17A3/KNCN/MYO3A/USH2A/LHFPL5/SLC26A3/VIL1/PCDH15/CDHR2/PDZK1/SLC28A1/GRXCR2/ITLN1/SLC28A2/MYO1A/USH1C/LRP2/SOAT2/SLC34A2/FOLR1/SLC28A3/ATP6V0A4/CA4/TSPEAR/ACE2/SLC9A3/SLC3A1/TMC2/SLC34A3
GOCC_EXTRINSIC_COMPONENT_OF_PLASMA_MEMBRANE	GOCC_EXTRINSIC_COMPONENT_OF_PLASMA_MEMBRANE	168	0.403511	1.24222	0.0344828	1	1	12123	tags=17%, list=21%, signal=13%	CDH7/H2BC1/CDH9/CTNNA2/CDH18/CNKSR2/GNG4/CARMIL2/GRAMD2A/NLRP10/STAC2/ESYT3/CDH17/ALOX15/PCSK9/CDH22/GNG8/GNAT1/CDH10/SNAP25/SNAP91/GNG3/GNAT3/CDH24/GNAO1/GNAZ/RACGAP1/CDH19
HP_POSTNATAL_MICROCEPHALY	HP_POSTNATAL_MICROCEPHALY	156	0.432211	1.32382	0.0344828	1	1	5027	tags=6%, list=9%, signal=5%	DCX/GABRA5/CTNNA2/GABRB2/OCA2/GRIN2A/SCN1A/GRIA2/NEXMIF
HP_SLOPING_FOREHEAD	HP_SLOPING_FOREHEAD	160	0.439579	1.35452	0.0344828	1	1	20272	tags=51%, list=36%, signal=33%	NEUROD2/KCNA1/WDR62/BRIP1/FANCA/XRCC2/FANCB/STIL/FANCC/SCN2A/RELN/KNL1/ASPM/PLK4/TRIP13/ZIC2/RAD51/CIT/BRCA1/NCAPH/PHGDH/KIF14/BUB1B/BUB1/RPGRIP1/FANCE/FANCI/CENPE/FANCD2/SASS6/KIF11/UBE2T/GNAO1/CEP55/BRCA2/RAD51C/FANCG/CEP152/OCLN/NDE1/NCAPD3/SLC25A19/CENPJ/CDK5RAP2/ERCC4/MAD2L2/DDX11/PSAT1/RTTN/TMEM107/PALB2/NCAPD2/FANCM/RFWD3/TCTN2/TSEN54/PARS2/STAG2/PRUNE1/MKS1/FANCL/SMPD4/EMG1/C2CD3/NUP107/T…
GOBP_NEGATIVE_REGULATION_OF_VASCULAR_ASSOCIATED_SMOOTH_MUSCLE_CELL_DIFFERENTIATION	GOBP_NEGATIVE_REGULATION_OF_VASCULAR_ASSOCIATED_SMOOTH_MUSCLE_CELL_DIFFERENTIATION	12	-0.87132	-1.62003	0.0350877	1	1	185	tags=25%, list=0%, signal=25%	MIR26A1/MIR15B/MIR100
GOBP_TROPHOBLAST_CELL_MIGRATION	GOBP_TROPHOBLAST_CELL_MIGRATION	16	-0.822984	-1.61862	0.0350877	1	1	5010	tags=12%, list=9%, signal=11%	MIR16-1/MIR15B
GOBP_CENTRAL_NERVOUS_SYSTEM_NEURON_DIFFERENTIATION	GOBP_CENTRAL_NERVOUS_SYSTEM_NEURON_DIFFERENTIATION	177	0.47972	1.48826	0.0357143	1	1	7679	tags=16%, list=14%, signal=14%	UNCX/LHX3/GSX2/OLIG3/SOX1/FOXN4/ASCL1/DBX1/GSX1/NKX2-2/PHOX2B/FEZF2/DCC/GBX1/CHRNB2/AGBL4/POU4F1/ERBB4/GABRB1/PHOX2A/DRAXIN/GRID2/NR2E1/SLC4A10/FGF8/OTP/MNX1/NANOS1
GOBP_CYTOKINESIS	GOBP_CYTOKINESIS	171	0.424403	1.31014	0.0357143	1	1	13818	tags=26%, list=24%, signal=19%	OR1A2/SEPTIN14/SEPTIN3/FMN2/DRD3/TRIM36/DCDC1/FSD1/RXFP3/E2F7/ROPN1B/CENPA/ESPL1/SEPTIN12/PLK1/PLK4/KIF4B/CDC6/PDXP/CIT/KIF4A/DRD2/KIF14/E2F8/AURKB/ECT2/KIF23/PRC1/NUSAP1/STMN1/AURKA/CEP55/BRCA2/RACGAP1/ANLN/SPIRE2/KIF20A/SHCBP1L/INCENP/CCP110/MYO19/KIF20B/RAB11FIP4/CDC25B
GOBP_MEIOTIC_CELL_CYCLE_PROCESS	GOBP_MEIOTIC_CELL_CYCLE_PROCESS	186	0.578796	1.80361	0.0357143	1	1	14080	tags=49%, list=25%, signal=37%	DNMT3L/SYCP1/MOS/PSMA8/BRDT/MAEL/DDX4/TEX15/STRA8/ASZ1/PRDM7/DMC1/PRDM9/FMN2/SPO11/TEX19/HORMAD2/DMRT1/OOEP/STAG3/FBXO43/CCNE2/SYCE2/TDRD9/PIWIL2/TOPAZ1/BRIP1/TDRD12/CDC25C/FANCA/EME1/SGO1/RAD54L/ESPL1/TDRKH/RAD51AP1/KIF18A/MEIKIN/SPATA22/NUF2/MND1/TUBB8/SYCP2/MYBL1/PSMC3IP/MEI4/MAJIN/RAD21L1/CDC25A/TTK/PLK1/MEIOC/HSF2BP/TRIP13/RMI1/RAD51/FBXO5/FIGNL1/BUB1B/CCNE1/BUB1/SMC2/CCNB2/MSH5/MEI1/MEIOB/S…
GOBP_MEMBRANE_DOCKING	GOBP_MEMBRANE_DOCKING	180	0.398103	1.2466	0.0357143	1	1	21651	tags=49%, list=38%, signal=31%	GRAMD2A/ESYT3/TUBB4A/STX19/KIF24/UNC13A/NEK2/CFTR/PLK1/PLK4/STX1B/CEP78/SNAP25/BVES/CEP72/HAUS5/CEP76/CEP152/HAUS7/FBF1/CDK1/NINL/CPLX2/HAUS8/NDE1/CCP110/HAUS6/CENPJ/CDK5RAP2/CEP131/CNTRL/HAUS1/CEP89/RAB3IP/PRKAR2B/CEP70/CEP250/RAB3B/ALMS1/HAUS4/TCTN2/ODF2/SCLT1/IQCB1/MKS1/TUBG1/CEP97/CEP192/SYT1/NPHP1/VPS45/DCTN3/C2CD3/RAB3C/HAUS2/CEP57/RPGRIP1L/STX5/TUBB/CKAP5/CLN3/STX17/VAPB/CETN2/CEP135/B9D1/…
GOBP_NUCLEOSOME_ORGANIZATION	GOBP_NUCLEOSOME_ORGANIZATION	179	0.449121	1.40149	0.0357143	1	1	15963	tags=44%, list=28%, signal=32%	TSPY4/H2AB2/H2BC1/H4C7/H2AB3/TSPY10/H1-8/H2AB1/BRDT/TSPY1/H4C14/PRDM9/H4C15/TSPY3/H2BC17/H1-6/H2BC11/H2BW2/H3C8/H2BW1/CHAF1B/H4C12/OIP5/CENPI/CENPA/SETSIP/H3C15/CENPK/KNL1/H2BC19P/NFE2/MCM2/NAP1L6P/H3C10/CENPL/CENPU/H4C9/ASF1B/CENPP/HJURP/H4C8/CENPO/CHD5/H2BC15/H3C12/CENPN/H2BS1/CENPM/H2BU1/ITGB3BP/CENPQ/HMGB2/H2BC21/H2BC4/CENPW/CENPH/NASP/TSPY26P/H2BC12/CENPS/CHAF1A/MIS18A/TSPYL6/ANP32E/VPS72/H1…
GOBP_RECEPTOR_SIGNALING_PATHWAY_VIA_STAT	GOBP_RECEPTOR_SIGNALING_PATHWAY_VIA_STAT	172	0.406159	1.25591	0.0357143	1	1	8579	tags=14%, list=15%, signal=12%	NEUROD1/CSH1/CSH2/IFNA6/MIR9-1/IFNA16/IFNA2/IFNA13/IFNA10/PRLR/IFNL4/IFNL3/CSHL1/IL20/ERBB4/PTPRT/GH2/IFNL1/PRL/IL22RA2/IFNL2/IFNG/CDK5R1/IFNA5
GOBP_REGULATION_OF_VENTRICULAR_CARDIAC_MUSCLE_CELL_MEMBRANE_REPOLARIZATION	GOBP_REGULATION_OF_VENTRICULAR_CARDIAC_MUSCLE_CELL_MEMBRANE_REPOLARIZATION	21	-0.745333	-1.47951	0.0357143	1	1	389	tags=14%, list=1%, signal=14%	KCNQ1/SCN4B/MIR1-1
GOBP_SENSORY_PERCEPTION_OF_MECHANICAL_STIMULUS	GOBP_SENSORY_PERCEPTION_OF_MECHANICAL_STIMULUS	166	0.54572	1.67153	0.0357143	1	1	10500	tags=27%, list=19%, signal=22%	GRXCR1/CABP2/POU4F2/CLRN1/OTOG/GABRA5/BARHL1/OTOR/DRGX/SLC17A8/LHFPL4/GABRB2/MYO3A/USH2A/LHFPL5/LHFPL3/KCNA1/COL2A1/SCN1A/PCDH15/HPN/CHRNB2/SRRM4/POU3F4/GRXCR2/ATP2B2/COCH/OTOS/TMPRSS3/MYO1A/USH1C/LRP2/USH1G/POU4F3/COL4A3/PHF24/COL11A2/ASIC3/ATP6V0A4/TSPEAR/EPYC/TMC2/CLIC5/CNTN5
GOBP_SPINDLE_ORGANIZATION	GOBP_SPINDLE_ORGANIZATION	180	0.436427	1.3666	0.0357143	1	1	17116	tags=36%, list=30%, signal=25%	MOS/TRIM36/FSD1/WDR62/NEK2/ESPL1/SPC25/NUF2/NDC80/STIL/TUBB8/ASPM/TTK/PLK1/AUNIP/KIFC1/KIF4B/MYBL2/KIF4A/FBXO5/DLGAP5/PSRC1/GPSM2/AURKB/GOLGA2P5/SPAG5/TPX2/CCNB2/KIF23/PRC1/CEP72/CENPE/STMN1/AURKA/KIF11/BORA/HAUS5/KNSTRN/RACGAP1/HAUS7/CDC20/SAC3D1/HAUS8/INCENP/CENPH/HAUS6/CENPJ/HAUS1/TUBGCP3/TACC3/CCNB1/CCSAP/SPICE1/HAUS4/MZT1/CHEK2/SMC1A/STAG2/NTMT1/TUBG1/RCC1/CEP97/CEP192/WRAP73/SMC3
GOCC_MICROTUBULE_ASSOCIATED_COMPLEX	GOCC_MICROTUBULE_ASSOCIATED_COMPLEX	154	0.415569	1.25973	0.0357143	1	1	14741	tags=30%, list=26%, signal=22%	DCX/DNAI1/KIF1A/KIF2B/TTBK1/KIF6/KIF15/DNAH8/DRC1/KIF18A/KIF18B/KIFC1/ACTL7A/DNAH12/KIF14/KIF2C/AURKB/CDCA8/ACTL7B/BIRC5/KIF23/ACTA1/KIF5C/AURKA/KIF11/HAUS5/HAUS7/KIF20A/ACTL9/RP1/HAUS8/DNAH14/INCENP/NDE1/HAUS6/DNAH6/KIF22/KIF20B/KIF19/HAUS1/KLC3/KIF25/SHTN1/TRIM54/KIF27/CCDC114
GOMF_CALMODULIN_BINDING	GOMF_CALMODULIN_BINDING	198	0.403263	1.28544	0.0357143	1	1	13677	tags=23%, list=24%, signal=17%	IQCF5/CNGA2/CAMKV/ARPP21/MYO3A/KCNH5/NOS1/MYH7/KCNQ2/CAMK2B/ATP2B2/MYH6/ADD2/ENKUR/ITPKA/MYO1A/MYLK2/CFAP221/AKAP5/UNC13A/ADCY8/IQCF1/RYR1/IQGAP3/KCNQ5/DAPK2/ASPM/IQCF6/SMTNL1/GRIN1/MAP6D1/ADCY1/MYO5C/ATP2B3/MYO7A/NRGN/CAMK1/KCNN1/USP6/KCNN2/MYO15A/CDK5RAP2/TRPV5/CTH/CACNA1S
GOMF_HISTONE_BINDING	GOMF_HISTONE_BINDING	240	0.469265	1.53207	0.0357143	1	1	19877	tags=44%, list=35%, signal=29%	TSPY4/H2BC1/CTCFL/DPPA3/RAG2/TSPY10/BRDT/TSPY1/AIRE/SAMD7/SCML2/TSPY3/DPF1/L3MBTL4/CHAF1B/CBX2/SETSIP/SPIN4/PHF19/MCM2/NCAPG2/ASF1B/UHRF1/HJURP/CHD5/ATAD2/STPG4/CKS1B/ANP32C/VRK1/MSH6/USP51/MORC4/NCAPD3/DEK/NASP/TONSL/TSPY26P/TAF1L/ING1/TSPYL6/ANP32E/VPS72/KMT5C/FAM156A/APBB1/CBX5/NCAPD2/KDM1B/SCML1/CKS2/USP49/H2AX/RNF168/WRAP53/FAM156B/COPRS/BRD3/BRPF3/SPIN2B/SUZ12/CBX8/IPO9/PKN1/HINFP/WDR5/TRIM…
HP_MYOCLONIC_SEIZURE	HP_MYOCLONIC_SEIZURE	177	0.398521	1.23635	0.0357143	1	1	10892	tags=15%, list=19%, signal=12%	MT-TQ/GABRA1/CACNG2/HCN1/GABRA5/MYT1L/KIF1A/SCN1A/INS/CAMK2B/KCNJ11/NEXMIF/BRSK2/GAD1/PDX1/CUX2/GABBR2/DNM1/KCNQ5/SCN2A/ELOVL4/STX1B/PHGDH/BUB1B/GRIN1/ABCC8/MED12L
HP_RIGIDITY	HP_RIGIDITY	180	0.386205	1.20934	0.0357143	1	1	13949	tags=19%, list=25%, signal=15%	KCNA4/GABRA1/ACTL6B/HCN1/SLC6A5/GABRA5/CNKSR2/GABRB2/SCN1A/SLC1A2/SCN8A/TUBB4A/ATXN8OS/RAB39B/FRRS1L/DNM1/RYR1/SCN2A/DNAJC6/JPH3/KCNA2/ACTA1/MME/KIF11/GABRA2/CACNA1A/DAB1/AP3B2/RNASEH2A/REEP2/ADH1C/NDUFAF6/UCHL1/GABRG2/GLRB
HP_STATUS_EPILEPTICUS	HP_STATUS_EPILEPTICUS	171	0.461825	1.42566	0.0357143	1	1	12538	tags=19%, list=22%, signal=15%	GABRA1/CACNG2/ACTL6B/HCN1/GABRA5/MYT1L/CNKSR2/GABRB2/KIF1A/SCN1A/KCNQ2/CACNA1E/CAMK2B/NEXMIF/SLC1A2/BRSK2/SCN8A/CDKN2B/DNM1/KCNQ5/SCN2A/STX1B/CDKN2C/GRIN1/MED12L/KCNA2/KIF11/GABRA2/CACNA1A/GRM7/NHLRC1/GRIA3/AP3B2
GOBP_ESTABLISHMENT_OF_RNA_LOCALIZATION	GOBP_ESTABLISHMENT_OF_RNA_LOCALIZATION	200	0.386843	1.21959	0.037037	1	1	24475	tags=67%, list=43%, signal=38%	NXF2B/LUZP4/NXF5/DDX25/POM121L12/RBFOX1/NUP62CL/POM121L2/IGF2BP3/NUP210/NXF2/IGF2BP2/KIF5C/RANBP17/IGF2BP1/NUP155/MAGOHB/THOC1/NUP188/NUP85/SEH1L/UPF3B/ALYREF/CPSF4/NDC1/NUP214/GLE1/SENP2/FMR1/NXT2/SLBP/XPO5/NUP205/NUP93/NCBP1/NUP160/EIF4A3/CPSF3/NUP107/POLR2D/UPF3A/FIP1L1/NXT1/NUP153/RBM8A/MAGOH/ENY2/NUP37/DDX39A/LSG1/CKAP5/UPF2/NUP54/SMG5/THOC5/NUP62/CETN2/RAE1/NUP35/SEC13/CHTOP/HHEX/NPIPA1/RNP…
GOBP_REGULATION_OF_GENE_EXPRESSION_EPIGENETIC	GOBP_REGULATION_OF_GENE_EXPRESSION_EPIGENETIC	199	0.380324	1.20494	0.037037	1	1	11324	tags=17%, list=20%, signal=13%	H2AB2/DNMT3L/CTCFL/H2AB3/DYDC1/H1-8/DYDC2/H2AB1/CDKN2B-AS1/H4C14/H4C15/PRDM14/H1-6/H3C8/H4C12/H2AC11/H3C15/CHEK1/PADI2/EZH2/ZFP57/H2AC17/CDC45/PHF19/H2AC1/H3C10/BRCA1/H4C9/H4C8/H2AC19/ATAD2/DNMT3B/H3C12
GOBP_SENSORY_ORGAN_MORPHOGENESIS	GOBP_SENSORY_ORGAN_MORPHOGENESIS	244	0.394975	1.27663	0.037037	1	1	16667	tags=32%, list=29%, signal=23%	NEUROG1/ATOH1/CLRN1/HCN1/SOX1/FOXN4/PAX2/MYO3A/CRYGB/AQP5/LHFPL5/COL2A1/PROM1/HPN/DSCAM/POU3F4/GRXCR2/PTF1A/FGF8/PAX6/USH1C/OTX1/USH1G/POU4F3/CRB1/DLX6/NOG/ZIC1/FOXE3/GNAT1/SIX3/PITX3/PTN/LHX1/GBX2/FASLG/RPGRIP1/PROX1/HESX1/SOX11/IHH/TCAP/IFT122/FBN2/MYO7A/FOXI1/VSX1/RP1/FZD2/TWIST1/WNT3A/CDON/EPHB2/MFAP2/RBP4/DLX5/WNT16/TULP1/SOX9/FOXG1/PITX2/NRL/PLS1/SIX4/CABP4/CYP26B1/SLC9A3R1/PDZD7/AGTPBP1/FS…
GOBP_SISTER_CHROMATID_SEGREGATION	GOBP_SISTER_CHROMATID_SEGREGATION	199	0.527506	1.67124	0.037037	1	1	19749	tags=56%, list=35%, signal=36%	UBE2DNL/MOS/SMC1B/HORMAD2/STAG3/RMI2/DDX11L8/HASPIN/SGO1/NEK2/ESPL1/KIF18A/MEIKIN/NUF2/NDC80/CDT1/CENPK/KIF18B/USP44/RAD21L1/MAD2L1/TTK/PLK1/CDCA5/KIFC1/ESCO2/KIF4B/DSCC1/TRIP13/CDC6/KIF4A/FBXO5/KNTC1/NCAPG2/NCAPH/NCAPG/CENPF/DLGAP5/PSRC1/KIF14/BUB1B/KIF2C/AURKB/BUB1/CDCA8/SPAG5/SMC2/KIF23/PRC1/DDX12P/DSN1/NUSAP1/SGO2/CENPE/ZWINT/FEN1/RAD51C/KNSTRN/RACGAP1/TOP2A/CDC20/UBE2C/XRCC3/INCENP/PTTG1/NCA…
GOBP_TELENCEPHALON_DEVELOPMENT	GOBP_TELENCEPHALON_DEVELOPMENT	228	0.427665	1.38625	0.037037	1	1	10431	tags=17%, list=18%, signal=14%	NEUROD6/UNCX/NEUROD1/GSX2/SLC32A1/ATOH1/HTR5A/POU3F2/ASCL1/FEZF2/KCNA1/RFX4/CNTNAP2/SLITRK5/ERBB4/DRAXIN/HTR6/NR2E1/EFNA2/RTN4RL1/FGF8/WDR62/CDK5R2/POU3F3/CDK5R1/PAX5/ANXA3/EZH2/RTN4R/DLX2/RELN/DMRTA2/FEZF1/SIX3/OXTR/DRD2/NKX2-1/KIF14/LHX1
GOMF_CATALYTIC_ACTIVITY_ACTING_ON_DNA	GOMF_CATALYTIC_ACTIVITY_ACTING_ON_DNA	199	0.416575	1.31979	0.037037	1	1	19048	tags=49%, list=34%, signal=32%	VRTN/DMC1/SPO11/DDX11L8/BRIP1/NEIL3/RAD54L/EXO1/TERT/PGBD5/POLE2/ATAD5/POLQ/SLX1B/PIF1/MCM2/DSCC1/RAD51/ERCC6L/RFC4/MCM8/BLM/DNA2/CHD5/DDX12P/MEIOB/DNMT3B/RECQL4/ZGRF1/FEN1/POLE/DCLRE1B/RAD51C/RFC3/POLA1/TOP2A/MCM6/XRCC3/TREX2/OGG1/CHTF18/NAV2/MCM5/METTL4/DNMT1/EXO5/HFM1/POLD1/ERCC4/GEN1/RFC5/THAP9/POLD3/MCM4/DDX11/TOP3A/RAD1/DNASE1L2/PCNA/RFC2/MCM7/LIG1/TDP1/SMC6/FANCM/MCM3/RAD54B/DCLRE1A/RUVBL1…
GOMF_VOLTAGE_GATED_ION_CHANNEL_ACTIVITY	GOMF_VOLTAGE_GATED_ION_CHANNEL_ACTIVITY	197	0.392162	1.24275	0.037037	1	1	10801	tags=25%, list=19%, signal=21%	KCNA4/KCNK16/CACNG2/HCN1/KCNC1/KCNG4/KCNH6/KCNV1/KCNA10/SLC17A3/KCNC2/KCNG3/KCNH5/GRIN2A/KCNA1/SCN1A/KCNB2/LRRC26/KCNQ2/CACNA1E/KCNJ11/KCNJ3/KCNJ6/CACNG6/KCNH3/CACNG5/KCNK2/SCN8A/CNR1/GRIN2C/CACNG4/SCN4A/KCNF1/HCN4/KCNK12/KCNK13/RYR1/CACNG1/KCNQ5/SCN2A/TRPM5/KCNG1/KCNH8/SNAP25/TMC2/CLIC5/GRIN1/KCNJ4/ABCC8/GPR89A
HP_HYPSARRHYTHMIA	HP_HYPSARRHYTHMIA	170	0.49668	1.52719	0.037037	1	1	12699	tags=21%, list=22%, signal=16%	DCX/ACTL6B/HCN1/GABRA5/CNKSR2/GABRB2/KIF1A/NEUROD2/KCNA1/KCNQ2/CNTNAP2/FMN2/CACNA1E/KCNJ11/NEXMIF/SLC1A2/NRXN1/GABRB1/GAD1/SCN8A/CUX2/GABBR2/FRRS1L/DNM1/SCN2A/PHGDH/ABCC8/KCNA2/GNAO1/GABRA2/CACNA1A/NHLRC1/SLC1A4/AP3B2/TUBB2A
HP_NON_MOTOR_SEIZURE	HP_NON_MOTOR_SEIZURE	169	0.429751	1.31941	0.037037	1	1	12947	tags=22%, list=23%, signal=17%	GABRA1/CACNG2/HCN1/MYT1L/CNKSR2/KIF1A/GRIN2A/NEUROD2/KCNA1/SCN1A/KCNQ2/CAMK2B/NEXMIF/BRSK2/PAK3/SCN8A/SYP/CUX2/RAB39B/FRRS1L/DNM1/KCNQ5/SCN2A/RELN/STX1B/PHGDH/GRIN1/MED12L/DHFR/GNAO1/CACNA1A/CLCN4/NHLRC1/LGI1/GABRB3/SLC9A7/ZNF711
GOBP_KERATINOCYTE_DIFFERENTIATION	GOBP_KERATINOCYTE_DIFFERENTIATION	299	-0.460537	-1.32518	0.0379747	1	1	9082	tags=19%, list=16%, signal=16%	DSG4/KRTAP5-10/KRTAP19-8/LCE1C/KRTAP5-7/KRT24/KRTAP9-2/KRTAP5-8/KRT26/KRTAP1-3/KRTAP9-6/LCE2C/KRTAP16-1/KRTAP3-3/KRTAP13-2/KRTAP5-11/LCE3B/KRT85/KRTAP1-5/KRTAP6-3/KRTAP4-6/KRTAP4-4/KRTAP21-1/LCE6A/KRT25/KRTAP20-2/KRTAP4-2/KRTAP1-4/KRTAP21-2/LCE2D/KRTAP19-4/KRTAP4-9/KRTAP9-4/LCE2B/MIR125B1/KRTAP4-11/KRTAP24-1/KRTAP9-9/KRTAP4-3/KRTAP9-3/KRTAP11-1/KRTAP9-8/KRTAP26-1/KRTAP21-3/KRTAP2-4/KRTAP19-3/KRTA…
GOBP_NEGATIVE_REGULATION_OF_CELLULAR_AMIDE_METABOLIC_PROCESS	GOBP_NEGATIVE_REGULATION_OF_CELLULAR_AMIDE_METABOLIC_PROCESS	218	-0.497562	-1.40763	0.0379747	1	1	7481	tags=11%, list=13%, signal=9%	MIR135B/MIR27A/MIR181A2/MIR31/MIR222/MIR299/MIR101-1/MIR16-1/MIR103A1/MIR361/MIR182/MIR107/MIR125B1/MIR28/MIR520E/MIR520C/MIR520B/MIR518B/MIR133B/MIR1-1/MIR96/MIR15B/MIR100
GOBP_NEGATIVE_REGULATION_OF_CYTOKINE_PRODUCTION	GOBP_NEGATIVE_REGULATION_OF_CYTOKINE_PRODUCTION	345	-0.457345	-1.33377	0.0379747	1	1	10997	tags=12%, list=19%, signal=10%	IRAK3/CR1/MIR221/MIR27B/MIRLET7F1/ARG1/MIR411/NLRP12/IL33/MIR132/MIR26B/IL23R/MIR98/ELANE/HGF/MIR134/MIR302C/IL1RL1/MIR302D/MIR181A2/MIR31/MIR147A/MIR194-1/MIR222/MIR101-1/MIR16-1/MIR506/MIR520H/MIR26A1/MIR361/MIR107/MIR125B1/MIR920/MIR28/MIR520C/MIR217/MIR520B/MIR373/MIR520G/MIR15B/MIR105-1/MIR206/MIR100
GOBP_TISSUE_MIGRATION	GOBP_TISSUE_MIGRATION	344	-0.447236	-1.30419	0.0379747	1	1	7481	tags=6%, list=13%, signal=5%	MIR135B/MIR27A/MIR31/MIR150/MIR222/MIR101-1/MIR2355/MIR16-1/MIR487B/MIR26A1/MIR361/MIR495/MIR30A/MIR640/MIR505/MIR133B/MIR188/MIR15B/MIR206/MIR329-1
GOBP_CHROMOSOME_SEGREGATION	GOBP_CHROMOSOME_SEGREGATION	335	0.528976	1.74929	0.0384615	1	1	16666	tags=44%, list=29%, signal=31%	UBE2DNL/SYCP1/MOS/BANF2/MAEL/TEX15/SMC1B/DMC1/PRDM9/FMN2/SPO11/HORMAD2/STAG3/RMI2/KIF2B/CCNE2/SYCE2/DDX11L8/BRIP1/HASPIN/EME1/SGO1/OIP5/NEK2/ESPL1/KIF18A/SPC25/MEIKIN/SPATA22/NUF2/NDC80/CDT1/CENPK/SYCP2/KIF18B/SKA1/MEI4/USP44/MAJIN/RAD21L1/KNL1/MAD2L1/TTK/PLK1/CDCA5/MEIOC/KIFC1/ESCO2/KIF4B/DSCC1/TRIP13/RMI1/SKA3/CDC6/KIF4A/FBXO5/KNTC1/BRCA1/NCAPG2/NCAPH/NCAPG/CENPF/DLGAP5/PSRC1/KIF14/BUB1B/MAGEA1…
GOBP_EAR_DEVELOPMENT	GOBP_EAR_DEVELOPMENT	202	0.484396	1.5309	0.0384615	1	1	9115	tags=16%, list=16%, signal=13%	GRXCR1/NEUROG1/OC90/NEUROD1/LHX3/ATOH1/CLRN1/NOX3/GABRA5/PAX2/SLC17A8/GABRB2/MYO3A/USH2A/LHFPL5/PHOX2B/COL2A1/PCDH15/HPN/POU3F4/MCOLN3/GRXCR2/KCNK2/FGF8/USH1C/OTX1/USH1G/POU4F3/DLX6/NOG/ZIC1/LIN7A
GOBP_KERATINIZATION	GOBP_KERATINIZATION	222	-0.495053	-1.40243	0.0384615	1	1	9082	tags=26%, list=16%, signal=22%	DSG4/KRTAP5-10/KRTAP19-8/LCE1C/KRTAP5-7/KRT24/KRTAP9-2/KRTAP5-8/KRT26/KRTAP1-3/KRTAP9-6/LCE2C/KRTAP16-1/KRTAP3-3/KRTAP13-2/KRTAP5-11/LCE3B/KRT85/KRTAP1-5/KRTAP6-3/KRTAP4-6/KRTAP4-4/KRTAP21-1/LCE6A/KRT25/KRTAP20-2/KRTAP4-2/KRTAP1-4/KRTAP21-2/LCE2D/KRTAP19-4/KRTAP4-9/KRTAP9-4/LCE2B/KRTAP4-11/KRTAP24-1/KRTAP9-9/KRTAP4-3/KRTAP9-3/KRTAP11-1/KRTAP9-8/KRTAP26-1/KRTAP21-3/KRTAP2-4/KRTAP19-3/KRTAP23-1/KRT…
GOBP_REGULATION_OF_NEURON_DIFFERENTIATION	GOBP_REGULATION_OF_NEURON_DIFFERENTIATION	188	0.387751	1.20821	0.0384615	1	1	14168	tags=27%, list=25%, signal=20%	NEUROG1/NEUROD1/LIN28A/POU4F2/ATOH1/MMD2/ASCL1/NEUROG3/NKX2-2/PHOX2B/FEZF2/NEUROD2/HES3/NR2E1/DISP3/TP73/CDK5R1/NLGN1/ADRA2B/DLX2/ISL1/TLX3/SOX2/FEZF1/BEND6/SIX3/ZNF536/ECT2/GPR37L1/PROX1/LTK/SOX11/DNMT3B/NRCAM/NKX6-1/RAC3/DAB1/SOX3/MAG/OLIG2/EPO/WNT3A/SLC6A4/CDK5RAP2/MMD/SH3GL3/CDON/EFNA3/ZC4H2/DTX1
GOBP_REGULATION_OF_VASCULATURE_DEVELOPMENT	GOBP_REGULATION_OF_VASCULATURE_DEVELOPMENT	316	-0.422736	-1.22248	0.0384615	1	1	15285	tags=19%, list=27%, signal=14%	FLT1/VEGFD/MIR199A1/PRKD1/MIR126/RAPGEF3/WNT5A/ADAMTS1/TNMD/ENPP2/TEK/ANGPT2/SEMA6A/ADAMTS9/HYAL1/PF4/BMPER/ADGRB1/CX3CR1/MIR494/PROK1/MIR378A/ADGRB3/KLK3/ANGPTL3/SLC39A12/MIR221/MIR27B/ANGPTL7/MIR132/FOXC2/MIR30C1/CMA1/MIR199B/MIRLET7G/HGF/PROK2/IL17F/MIR99B/MIR34B/MIR31/MIR222/MIR377/MIR1298/MIR185/MIR16-1/MIR487B/MIR361/MIR30B/MIR495/MIR125B1/MIR30A/MIR640/MIR30E/MIR505/MIR217/MIR1-1/MIR15B/MI…
GOCC_CHROMOSOME_CENTROMERIC_REGION	GOCC_CHROMOSOME_CENTROMERIC_REGION	196	0.558843	1.76375	0.0384615	1	1	18654	tags=57%, list=33%, signal=38%	SYCP1/SMC1B/BOD1L2/STAG3/KIF2B/SGO1/OIP5/CENPI/CENPA/NEK2/KIF18A/SPC25/MEIKIN/NUF2/NDC80/CDT1/CENPK/SKA1/KNL1/MAD2L1/TTK/PLK1/CDCA5/SPC24/ESCO2/DSCC1/SKA3/ERCC6L/KNTC1/CENPL/CENPU/HELLS/NCAPG/MTBP/CENPF/BUB1B/CENPP/KIF2C/AURKB/BUB1/CDCA8/HJURP/SPAG5/BIRC5/CENPO/KDM4D/DSN1/SGO2/CENPE/ZWINT/CENPN/CENPM/KNSTRN/TOP2A/SUV39H1/SUV39H2/ITGB3BP/CENPQ/CENPW/INCENP/CENPH/NDE1/NCAPD3/KIF22/CENPS/SMC4/SKA2/M…
GOCC_INTERMEDIATE_FILAMENT	GOCC_INTERMEDIATE_FILAMENT	203	-0.517574	-1.45265	0.0384615	1	1	8476	tags=26%, list=15%, signal=22%	KRTAP5-7/KRT24/KRTAP9-2/KRTAP5-8/KRT26/KRTAP1-3/LMNTD1/KRTAP9-6/KRTAP16-1/KRTAP3-3/KRTAP13-2/KRTAP5-11/KRT85/KRTAP22-2/KRTAP1-5/KRTAP6-3/KRTAP4-6/KRTAP4-4/KRTAP21-1/KRT25/KRTAP20-2/KRTAP4-2/KRTAP1-4/KRTAP4-12/KRTAP21-2/KRTAP19-4/KRTAP4-9/KRTAP9-4/KRTAP4-11/KRTAP24-1/KRTAP9-9/KRTAP4-3/KRTAP9-3/KRTAP7-1/KRTAP11-1/KRTAP9-8/KRTAP26-1/KRTAP21-3/KRTAP2-4/KRTAP19-3/KRTAP23-1/KRTAP27-1/KRTAP13-3/KRTAP4-5…
HP_GENERALIZED_ONSET_MOTOR_SEIZURE	HP_GENERALIZED_ONSET_MOTOR_SEIZURE	191	0.426915	1.34027	0.0384615	1	1	10892	tags=17%, list=19%, signal=14%	MT-TQ/GABRA1/CACNG2/HCN1/GABRA5/MYT1L/KIF1A/GRIN2A/NEUROD2/KCNA1/SCN1A/INS/KCNQ2/CAMK2B/KCNJ11/NEXMIF/BRSK2/GAD1/PDX1/SCN8A/CUX2/GABBR2/DNM1/KCNQ5/SCN2A/ELOVL4/STX1B/PHGDH/BUB1B/GRIN1/ABCC8/MED12L
HP_RETINAL_DEGENERATION	HP_RETINAL_DEGENERATION	226	0.402728	1.29627	0.0384615	1	1	11883	tags=15%, list=21%, signal=12%	ACTL6B/GRK1/HCN1/GABRA5/MYT1L/PAX2/CNKSR2/GABRB2/RLBP1/MIR204/COL2A1/PROM1/PDE6H/RHO/POU3F4/SLC1A2/AIPL1/SCN8A/CRX/MAB21L1/GUCA1A/DNM1/DOCK3/ELOVL4/PLK4/CEP78/SLC7A14/RPGRIP1/LAMA1/KCNA2/PITPNM3/PRPH2/FBN2/GABRA2/CACNA1A
GOBP_SKIN_DEVELOPMENT	GOBP_SKIN_DEVELOPMENT	412	-0.424622	-1.24358	0.038961	1	1	6740	tags=12%, list=12%, signal=10%	LCE2C/KRTAP16-1/SHH/KRTAP3-3/KRTAP13-2/KRTAP5-11/LCE3B/KRT85/KRTAP1-5/KRTAP6-3/KRTAP4-6/KRTAP4-4/KRTAP21-1/LCE6A/KRT25/KRTAP20-2/KRTAP4-2/KRTAP1-4/KRTAP21-2/LCE2D/KRTAP19-4/KRTAP4-9/KRTAP9-4/LCE2B/MIR125B1/KRTAP4-11/KRTAP24-1/KRTAP9-9/KRTAP4-3/KRTAP9-3/KRTAP11-1/KRTAP9-8/KRTAP26-1/KRTAP21-3/KRTAP2-4/KRTAP19-3/KRTAP23-1/KRTAP27-1/KRTAP13-3/KRTAP4-5/KRTAP8-1/KRTAP20-1/KRTAP6-1/KRTAP19-6/KRTAP13-4/K…
GOBP_CELL_FATE_COMMITMENT	GOBP_CELL_FATE_COMMITMENT	249	0.426855	1.36969	0.04	1	1	7407	tags=16%, list=13%, signal=14%	MIR208A/NEUROG1/NEUROD1/LHX3/GSX2/ATOH1/NKX6-3/OLIG3/SOX1/FEV/FOXN4/MYT1L/PAX2/POU3F2/ASCL1/RAG2/MYOG/DBX1/GSX1/NKX2-2/FEZF2/GBX1/MESP1/FOXA2/TBXT/TBX10/MYF5/PRDM14/POU4F1/PTF1A/WNT8A/ERBB4/ONECUT2/NR2E1/OLIG1/GCM1/FGF8/PAX6/MNX1
GOBP_MEIOTIC_CELL_CYCLE	GOBP_MEIOTIC_CELL_CYCLE	246	0.571689	1.83771	0.04	1	1	14080	tags=47%, list=25%, signal=36%	DNMT3L/SYCP1/FAM9A/MOS/FAM9B/PSMA8/H1-8/TDRD1/BRDT/MAEL/DDX4/TEX15/SMC1B/STRA8/ASZ1/PRDM7/DMC1/PRDM9/FMN2/SPO11/TEX19/HORMAD2/DMRT1/OOEP/STAG3/DUSP13/FBXO43/CCNE2/FAM9C/SYCE2/TDRD9/PIWIL2/TOPAZ1/MNS1/BRIP1/TDRD12/PIWIL3/CDC25C/FANCA/EME1/SGO1/RAD54L/EXO1/NEK2/XRCC2/ESPL1/TDRKH/RAD51AP1/KIF18A/ZFP42/MEIKIN/SPATA22/NUF2/PKMYT1/MND1/TUBB8/SYCP2/MYBL1/PSMC3IP/MEI4/MAJIN/RAD21L1/CDC25A/TTK/PLK1/CCNB3/…
GOBP_REGULATION_OF_CELL_CYCLE_G1_S_PHASE_TRANSITION	GOBP_REGULATION_OF_CELL_CYCLE_G1_S_PHASE_TRANSITION	185	-0.505567	-1.39729	0.04	1	1	6724	tags=8%, list=12%, signal=7%	CRNN/TFDP3/MIR222/MIR638/MIR16-1/MIR520H/MIR26A1/MIR519D/MIR495/MIR520A/MIR133B/MIR15B/MIR873/MIR515-1
GOBP_RESPONSE_TO_MONOSACCHARIDE	GOBP_RESPONSE_TO_MONOSACCHARIDE	194	0.409264	1.28724	0.04	1	1	9796	tags=13%, list=17%, signal=11%	NEUROD1/LIN28A/GCG/TRH/PAX2/PCK1/UCN3/PRLH/NR0B2/NKX2-2/FOXA2/KCNJ11/PKLR/BRSK2/PDX1/FGF21/ILDR2/CASR/COL4A3/GATA4/ADCY8/KHK/CFTR/CLTRN/HNF4A/RMI1
GOBP_VESICLE_MEDIATED_TRANSPORT_IN_SYNAPSE	GOBP_VESICLE_MEDIATED_TRANSPORT_IN_SYNAPSE	193	0.39112	1.22466	0.04	1	1	11108	tags=20%, list=20%, signal=16%	SLC17A6/SLC32A1/DDC/SLC17A8/RIMS4/CSPG5/SYT6/DRD3/BRSK2/SH3GL2/CNR1/RIMS1/DOC2A/SYP/BSN/CPLX3/STX19/CALY/UNC13A/CDK5R1/DNM1/NLGN1/SYT12/SYN3/STX1B/SLC4A8/CADPS/SNAP25/SNAP91/CEL/HPCA/DRD2/PACSIN1/DNAJC6/CHRNA5/RIMS3/PCLO/SYN2/ADCY1
GOCC_INTERMEDIATE_FILAMENT_CYTOSKELETON	GOCC_INTERMEDIATE_FILAMENT_CYTOSKELETON	244	-0.496776	-1.40702	0.04	1	1	8476	tags=21%, list=15%, signal=18%	KRTAP5-7/KRT24/KRTAP9-2/KRTAP5-8/KRT26/KRTAP1-3/LMNTD1/KRTAP9-6/KRTAP16-1/KRTAP3-3/KRTAP13-2/KRTAP5-11/KRT85/KRTAP22-2/KRTAP1-5/KRTAP6-3/KRTAP4-6/KRTAP4-4/KRTAP21-1/KRT25/KRTAP20-2/KRTAP4-2/KRTAP1-4/KRTAP4-12/KRTAP21-2/KRTAP19-4/KRTAP4-9/KRTAP9-4/KRTAP4-11/KRTAP24-1/KRTAP9-9/KRTAP4-3/KRTAP9-3/KRTAP7-1/KRTAP11-1/KRTAP9-8/KRTAP26-1/KRTAP21-3/KRTAP2-4/KRTAP19-3/KRTAP23-1/KRTAP27-1/KRTAP13-3/KRTAP4-5…
GOCC_NUCLEAR_CHROMOSOME	GOCC_NUCLEAR_CHROMOSOME	246	0.429157	1.37953	0.04	1	1	18812	tags=50%, list=33%, signal=33%	SYCP1/FAM9A/FAM9B/SMC1B/H4C14/DMC1/SPO11/H4C15/HORMAD2/STAG3/FAM9C/SYCE2/RAD9B/H3C8/MCM10/H4C12/CENPA/ORC1/NEK2/NUF2/POLE2/NDC80/PRIM1/GINS2/CHEK1/CENPK/SLX1B/SYCP2/GINS1/GINS4/MEI4/RAD21L1/PLK1/MCM2/WDHD1/RAD51/ORC6/H3C10/BRCA1/MMS22L/H4C9/FIGNL1/BUB1B/BUB1/H4C8/BIRC5/SMC2/BLM/MSH5/CENPO/GINS3/DSN1/H3C12/FKBP6/POLE/PRIM2/RPA3/BRCA2/TIPIN/POLA1/POLA2/TOP2A/MCM6/SUV39H1/MCM5/TIMELESS/INCENP/TOPBP1…
GOMF_LYASE_ACTIVITY	GOMF_LYASE_ACTIVITY	192	0.398958	1.24735	0.04	1	1	17391	tags=29%, list=31%, signal=20%	CENPVL1/GAD2/DDC/PCK1/URAD/CYP1A2/CA6/CBSL/CA5A/GADL1/CENPVL3/FTCD/UROC1/GAD1/ACOD1/NEIL3/ADCY8/POLQ/CA4/SHMT1/CYP1A1/HAL/ADCY1/ENO3/CA7/GUCY2F/OGG1/ECHDC3/CA14/CTH/ALDOB/CHAC2/CA8/ACMSD/CA13/RNASE2/ENO2/CENPV/FAHD2A/GGCT/CBS/APIP/KYAT1/ME1/UMPS/FAHD2B/DERA/HACD2/GLO1/PAICS/HACL1/HACD1/MGST3/EHHADH/PCK2/NTHL1
HP_DIALEPTIC_SEIZURE	HP_DIALEPTIC_SEIZURE	193	0.411255	1.28771	0.04	1	1	12947	tags=19%, list=23%, signal=15%	GABRA1/CACNG2/HCN1/MYT1L/CNKSR2/KIF1A/GRIN2A/NEUROD2/KCNA1/SCN1A/KCNQ2/FMN2/CAMK2B/NEXMIF/BRSK2/PAK3/SCN8A/SYP/CUX2/RAB39B/FRRS1L/DNM1/KCNQ5/SCN2A/RELN/STX1B/PHGDH/GRIN1/MED12L/DHFR/GNAO1/CLCN4/NHLRC1/LGI1/GABRB3/SLC9A7/ZNF711
HP_FOCAL_ONSET_SEIZURE	HP_FOCAL_ONSET_SEIZURE	259	0.461184	1.48964	0.04	1	1	9300	tags=12%, list=16%, signal=10%	MT-TQ/DCX/GABRA1/CACNG2/HCN1/GABRA5/MYT1L/KIF1A/GRIN2A/NEUROD2/KCNA1/SCN1A/KCNQ2/GRIA2/CNTNAP2/FMN2/CAMK2B/KCNJ11/TUBB2B/BRSK2/CTNND2/SCN8A/CUX2/FRRS1L/TERT/DNM1/KCNQ5/ADRA2B/SCN2A/RELN
HP_INTERICTAL_EEG_ABNORMALITY	HP_INTERICTAL_EEG_ABNORMALITY	256	0.40957	1.31906	0.04	1	1	12840	tags=17%, list=23%, signal=13%	DCX/GABRA1/ACTL6B/HCN1/GABRA5/CNKSR2/GABRB2/KIF1A/GRIN2A/NEUROD2/KCNA1/SCN1A/KCNQ2/CNTNAP2/FMN2/CACNA1E/KCNJ11/NEXMIF/SLC1A2/NRXN1/GABRB1/GAD1/SCN8A/CUX2/GABBR2/FRRS1L/DNM1/SCN2A/STX1B/SNAP25/PHGDH/ABCC8/KCNA2/GNAO1/GABRA2/CACNA1A/CLCN4/GRM7/NHLRC1/SLC1A4/AP3B2/TUBB2A/GABRB3
GOBP_NIK_NF_KAPPAB_SIGNALING	GOBP_NIK_NF_KAPPAB_SIGNALING	181	-0.449263	-1.24509	0.0405405	1	1	3828	tags=2%, list=7%, signal=2%	MIR182/MIR125B1/MIR15B/MIR329-1
GOBP_INTERLEUKIN_6_PRODUCTION	GOBP_INTERLEUKIN_6_PRODUCTION	153	-0.46475	-1.28079	0.0410959	1	1	10997	tags=11%, list=19%, signal=9%	IRAK3/IL17A/TSLP/NLRP12/IL33/MIR132/ADCYAP1/MIR98/HGF/IL17F/MIR181A2/MIR101-1/MIR26A1/MIR361/MIR217/MIR105-1/MIR206
GOBP_ANTERIOR_POSTERIOR_PATTERN_SPECIFICATION	GOBP_ANTERIOR_POSTERIOR_PATTERN_SPECIFICATION	203	0.404927	1.27514	0.0416667	1	1	9006	tags=13%, list=16%, signal=11%	NEUROG1/ZIC3/NEUROD1/HELT/CFC1/PCDH8/MESP2/OTX2/FEZF2/MESP1/FOXA2/TBXT/HES3/MYF5/TDGF1P3/PAX1/WNT8A/CFC1B/COBL/RIPPLY1/MSGN1/FGF8/OTX1/GATA4/XRCC2/NOG/DLL3
GOBP_DNA_CONFORMATION_CHANGE	GOBP_DNA_CONFORMATION_CHANGE	346	0.455287	1.4881	0.0416667	1	1	15414	tags=36%, list=27%, signal=26%	TSPY4/H2AB2/SYCP1/H2BC1/H4C7/H2AB3/BANF2/TSPY10/H1-8/PRM3/H2AB1/APOBEC1/TSPY1/H4C14/CDKN2A/PRDM9/H4C15/AICDA/TSPY3/H2BC17/H1-6/DDX11L8/H2BC11/H2BW2/PRM1/BRIP1/H3C8/H2BW1/CHAF1B/RAD54L/H4C12/OIP5/CENPI/CENPA/SETSIP/H3C15/CENPK/POLQ/KNL1/PIF1/H2BC19P/CDCA5/MCM2/DSCC1/RAD51/NAP1L6P/ERCC6L/H3C10/CENPL/CENPU/HELLS/NCAPG2/NCAPH/RFC4/NCAPG/H4C9/TET1/ASF1B/CENPP/HJURP/H4C8/SMC2/MCM8/BLM/CENPO/DNA2/CHD5/H…
GOBP_DNA_RECOMBINATION	GOBP_DNA_RECOMBINATION	290	0.43177	1.41122	0.0416667	1	1	18579	tags=48%, list=33%, signal=32%	SYCP1/RAG2/H1-8/TEX15/VRTN/PRDM7/DMC1/PRDM9/SPO11/TEX19/OOEP/RMI2/H1-6/BRIP1/EME1/RAD54L/EXO1/PGBD5/XRCC2/FANCB/RAD51AP1/GINS2/CHEK1/CDC7/MND1/POLQ/SLX1B/PSMC3IP/GINS4/MEI4/RAD21L1/CDC45/PIF1/MCM2/HROB/AUNIP/HSF2BP/TRIP13/RMI1/RAD51/BRCA1/MMS22L/FIGNL1/MCM8/BLM/MSH5/KDM4D/MEIOB/RAD51AP2/FANCD2/RECQL4/FEN1/RPA3/BRCA2/RAD51C/TOP2A/MCM6/XRCC3/MSH2/TBX21/PARPBP/MCM5/CORT/HMGB2/NSD2/TIMELESS/MSH6/USP5…
GOBP_GERM_CELL_DEVELOPMENT	GOBP_GERM_CELL_DEVELOPMENT	257	0.473837	1.52432	0.0416667	1	1	13871	tags=35%, list=25%, signal=27%	LIN28A/SYCP1/H2BC1/FAM9A/ADAD1/SOHLH1/FAM9B/TDRD1/CELF4/YBX2/BSPH1/SLC26A3/CFAP65/OCA2/GPR149/ZPBP2/DDX25/STRA8/DMC1/SPINK2/FMN2/SPO11/CATSPERD/MEIG1/SPEM1/NOBOX/SEMG1/ROPN1/PRDM14/DAZL/DMRT1/AMH/GMCL2/SPACA1/FAM9C/PIWIL2/TOPAZ1/TXNDC8/TCP11/PDILT/BRIP1/NANOS1/CCDC63/DMRTC2/SUN5/SOX30/ROPN1B/IQCF1/SPANXB1/DPY19L2P2/FANCC/TUBB8/MEI4/CFAP43/CFTR/KNL1/MEIOC/TRIP13/FBXO5/CFAP97D1/PTN/WT1/TCP11X1/SPEF…
GOBP_INSULIN_SECRETION	GOBP_INSULIN_SECRETION	207	0.368667	1.17514	0.0416667	1	1	14695	tags=24%, list=26%, signal=18%	NEUROD1/GCG/TRH/UCN3/NR0B2/KCNC2/HNF1A/FOXA2/CACNA1E/ENHO/GPR119/KCNJ11/FFAR1/BRSK2/PDX1/CNR1/ILDR2/CPLX3/CASR/ADCY8/IFNG/GHSR/CHGA/ISL1/CFTR/CLTRN/HNF4A/GLP1R/SNAP25/DRD2/OXCT1/ABCC8/PCLO/SLC30A8/NKX6-1/CACNA1A/CARTPT/NR1H4/GIP/VGF/RFX6/RIMS2/SLC16A1/CACNA2D2/GCK/RBP4/GAL/PTPRN/DPP4/CCL5
GOCC_CATION_CHANNEL_COMPLEX	GOCC_CATION_CHANNEL_COMPLEX	222	0.382391	1.21799	0.0416667	1	1	10762	tags=24%, list=19%, signal=19%	KCNA4/CACNG2/HCN1/KCNC1/HTR3B/SHISA9/HTR3A/KCNG4/KCNV1/KCNA10/UNC80/KCNC2/KCNG3/SHISA8/NOS1/GRIN2A/KCNA1/SCN1A/KCNB2/LRRC26/KCNQ2/DPP6/GRIA2/CNTNAP2/CACNA1E/CATSPERD/KCNJ11/KCNJ3/KCNJ6/CACNG6/CNIH2/CACNG5/KCNK2/SCN8A/GRIN2C/CACNG4/SCN4A/KCNF1/HCN4/RYR1/CACNG1/KCNQ5/CATSPERG/NLGN1/SCN2A/KCNG1/TRPC3/SNAP25/ATP2A1/GRIN1/KCNJ4/MCUB/ABCC8
GOCC_PROTEIN_DNA_COMPLEX	GOCC_PROTEIN_DNA_COMPLEX	204	0.416261	1.31762	0.0416667	1	1	15839	tags=39%, list=28%, signal=28%	H2AB2/H2BC1/H4C7/H2AB3/PAX2/RAG2/MYOG/H1-8/PRM3/H2AB1/H4C14/H4C15/ST18/H2BC17/H1-6/H2BC11/H2BW2/PRM1/H3C8/H2BW1/H4C12/CENPA/H2AC11/TERT/PRIM1/GINS2/H3C15/GINS1/GINS4/H2AC17/CDC45/H2BC19P/NFE2/H2AC1/MCM2/H3C10/H4C9/H4C8/H2AC19/DONSON/H2BC15/GINS3/H3C12/H2BS1/PRIM2/RPA3/POLA1/POLA2/MCM6/H2BU1/H2AC13/MCM5/H2BC21/H2BC4/SLF1/TONSL/POLD1/H2BC12/POLD3/MCM4/H2AC8/PCNA/MCM7/H1-3/H3C4/H2BC8/H2BC5/KDM1B/H2A…
GOCC_TRANSPORT_VESICLE_MEMBRANE	GOCC_TRANSPORT_VESICLE_MEMBRANE	203	0.444717	1.40044	0.0416667	1	1	9370	tags=13%, list=17%, signal=11%	GAD2/SLC17A6/SLC32A1/SCGN/SYNPR/SCG3/SYT4/SLC17A8/SYNGR4/SVOP/AQP2/SYT6/SYT10/CNIH2/SYCN/SLC30A3/SH3GL2/DOC2A/SYP/BSN/CPLX3/SV2B/UNC13A/FOLR1/SYT12/SYN3/CA4
HP_AGENESIS_OF_CORPUS_CALLOSUM	HP_AGENESIS_OF_CORPUS_CALLOSUM	288	0.386702	1.25826	0.0416667	1	1	15946	tags=24%, list=28%, signal=18%	MT-TQ/DCX/PDYN/PROKR2/OTX2/DCC/FOXA2/ALX3/TUBB2B/PROP1/FGF8/WDR62/LRP2/KIF15/PRDM16/STIL/ZIC1/RELN/KNL1/ASPM/SOX2/ZIC2/RAD51/CIT/SIX3/CENPF/NKX2-1/PHGDH/KIF14/BUB1B/GPSM2/MED12L/HESX1/SOX11/FANCI/CENPE/FANCD2/RECQL4/SASS6/HYLS1/CEP152/RAC3/WNT3/SOX3/PYCR1/NSD2/L1CAM/NDE1/NCAPD3/SLC25A19/CENPJ/CDK5RAP2/ALX1/CDON/FLVCR2/TUBB3/POMT1/RTTN/GAS1/EOMES/TMEM237/FOXG1/NODAL/GCSH/SUZ12/SMC1A/TUBA8/AMER1/PO…
GOBP_CELL_CYCLE_CHECKPOINT	GOBP_CELL_CYCLE_CHECKPOINT	208	0.442754	1.41692	0.0434783	1	1	21877	tags=60%, list=39%, signal=37%	STK33/RAD9B/BRIP1/CLSPN/CDC25C/EME1/E2F1/WDR76/E2F7/ORC1/DTL/TICRR/NDC80/CHEK1/CDT1/USP44/CDC45/MAD2L1/TTK/PLK1/TRIP13/CDC6/KNTC1/BRCA1/CENPF/BUB1B/E2F8/AURKB/BUB1/GTSE1/PROX1/BLM/DNA2/DONSON/SOX11/MDC1/FANCD2/ZWINT/AURKA/DCLRE1B/TIPIN/CDC20/CDK1/XRCC3/MSH2/CDK2/TIMELESS/TOPBP1/CDK5RAP2/GEN1/WEE2/MAD2L2/RAD1/PCNA/CCNB1/SPDL1/THOC1/BRCC3/RFWD3/H2AX/PIDD1/HORMAD1/TEX14/CHEK2/ZW10/HINFP/CASP2/ZWILCH…
GOBP_CHROMATIN_ASSEMBLY_OR_DISASSEMBLY	GOBP_CHROMATIN_ASSEMBLY_OR_DISASSEMBLY	216	0.451077	1.42733	0.0434783	1	1	15963	tags=40%, list=28%, signal=29%	TSPY4/H2AB2/H2BC1/H4C7/H2AB3/TSPY10/H1-8/H2AB1/APOBEC1/TSPY1/H4C14/CDKN2A/PRDM9/H4C15/AICDA/TSPY3/H2BC17/H1-6/H2BC11/H2BW2/H3C8/H2BW1/CHAF1B/H4C12/OIP5/CENPI/CENPA/SETSIP/H3C15/CENPK/PADI2/KNL1/H2BC19P/NFE2/MCM2/NAP1L6P/H3C10/CENPL/CENPU/HELLS/H4C9/TET1/ASF1B/CENPP/HJURP/H4C8/CENPO/H2BC15/H3C12/CENPN/H2BS1/CENPM/BEND3/SUV39H1/H2BU1/SUV39H2/ITGB3BP/CENPQ/HMGB2/HIRIP3/H2BC21/H2BC4/CENPW/CENPH/DNMT1…
GOBP_DNA_PACKAGING	GOBP_DNA_PACKAGING	234	0.46148	1.47769	0.0434783	1	1	14889	tags=38%, list=26%, signal=28%	TSPY4/H2AB2/SYCP1/H2BC1/H4C7/H2AB3/BANF2/TSPY10/H1-8/PRM3/H2AB1/APOBEC1/TSPY1/H4C14/CDKN2A/PRDM9/H4C15/AICDA/TSPY3/H2BC17/H1-6/H2BC11/H2BW2/PRM1/H3C8/H2BW1/CHAF1B/H4C12/OIP5/CENPI/CENPA/SETSIP/H3C15/CENPK/KNL1/H2BC19P/CDCA5/MCM2/NAP1L6P/H3C10/CENPL/CENPU/HELLS/NCAPG2/NCAPH/NCAPG/H4C9/TET1/ASF1B/CENPP/HJURP/H4C8/SMC2/CENPO/CHD5/H2BC15/H3C12/NUSAP1/CENPN/H2BS1/CENPM/BEND3/TOP2A/SUV39H1/H2BU1/ITGB3B…
GOBP_EPITHELIAL_CELL_FATE_COMMITMENT	GOBP_EPITHELIAL_CELL_FATE_COMMITMENT	15	0.797045	1.72775	0.0434783	1	1	3359	tags=20%, list=6%, signal=19%	NEUROD1/ATOH1/NKX2-2
GOBP_MACROMOLECULE_METHYLATION	GOBP_MACROMOLECULE_METHYLATION	299	0.453234	1.50235	0.0434783	1	1	21555	tags=47%, list=38%, signal=30%	GCG/DNMT3L/CTCFL/DYDC1/DPPA3/SMYD1/H1-8/TDRD1/DYDC2/MAEL/DDX4/TEX15/ASZ1/PRDM7/PRDM9/MYB/PRDM14/TDRD9/PIWIL2/EZHIP/TDRD12/PRDM16/TDRKH/PAX5/EZH2/ZFP57/PHF19/PRDM12/CYP1A1/BRCA1/HELLS/TET1/WT1/BHMT/CHD5/KDM4D/DNMT3B/FKBP6/STPG4/BEND3/NR1H4/SUV39H1/GFI1/METTL4/SUV39H2/NSD2/PLD6/DNMT1/METTL18/HENMT1/PPM1D/METTL22/PAGR1/PIWIL4/MIS18A/KMT5C/KDM1B/METTL6/COPRS/SUZ12/PAXIP1/TRMT2B/GTPBP3/METTL21A/EHMT2/…
GOBP_NEUROTRANSMITTER_TRANSPORT	GOBP_NEUROTRANSMITTER_TRANSPORT	208	0.393029	1.25779	0.0434783	1	1	11170	tags=21%, list=20%, signal=17%	GAD2/SLC17A6/SLC32A1/DDC/SLC6A5/SYT4/SLC17A8/SLC22A2/HRH3/RIMS4/NOS1/CSPG5/SYT6/DRD3/NRXN1/GAD1/CNR1/RIMS1/SLC28A2/DOC2A/SYP/CPLX3/SV2B/STX19/UNC13A/GABRQ/NLGN1/SYT12/LIN7A/SYN3/STX1B/SLC4A8/CADPS/SNAP25/SLC6A16/DRD2/SLC29A4/SLC1A3/CHRNA5/RIMS3/PCLO/SYN2/ADCY1/SLC29A2
GOBP_ORGANELLE_FISSION	GOBP_ORGANELLE_FISSION	481	0.47912	1.61245	0.0434783	1	1	16047	tags=38%, list=28%, signal=27%	NEUROG1/UBE2DNL/DNMT3L/SYCP1/MOS/PSMA8/BRDT/MAEL/DDX4/TEX15/SMC1B/STRA8/INS/ASZ1/PRDM7/DMC1/PRDM9/FMN2/SPO11/TEX19/HORMAD2/DMRT1/DRD3/OOEP/STAG3/FBXO43/CCNE2/SYCE2/TDRD9/PIWIL2/FGF8/BRIP1/TDRD12/HASPIN/CDC25C/FANCA/EME1/SGO1/RAD54L/NEK2/DNM1/ESPL1/TDRKH/RAD51AP1/KIF18A/MEIKIN/SPATA22/NUF2/NDC80/CHEK1/PKMYT1/CDT1/MND1/CENPK/TUBB8/SYCP2/KIF18B/MYBL1/PSMC3IP/MEI4/USP44/MAJIN/RAD21L1/MAD2L1/TTK/PLK1/…
GOBP_PATTERN_SPECIFICATION_PROCESS	GOBP_PATTERN_SPECIFICATION_PROCESS	426	0.399105	1.34933	0.0434783	1	1	10816	tags=16%, list=19%, signal=13%	NEUROG1/UNCX/ZIC3/NEUROD1/LHX3/GSX2/SOX1/HELT/FOXN4/CFC1/PAX2/PCDH8/ASCL1/DNAI1/DAND5/DBX1/IRX1/MESP2/OTX2/NKX2-2/FEZF2/RAX/MESP1/FOXA2/RFX4/TBXT/ALX3/HES3/MYF5/TDGF1P3/PAX1/WNT8A/OOEP/ERBB4/CFC1B/HOXD12/ENKUR/COBL/RIPPLY1/MSGN1/FGF8/MNS1/OTX1/LRP2/GATA4/DRC1/CITED1/XRCC2/FOLR1/STIL/NOG/ZIC1/SP8/DLL3/SHROOM3/DLX2/ISL1/RELN/DMRTA2/FEZF1/SIX3/RIPPLY3/HOXA9/NKX2-1/WT1/LHX1/LEFTY1/DNAAF1/GBX2/WNT11
GOBP_REGULATION_OF_CELL_CYCLE_G2_M_PHASE_TRANSITION	GOBP_REGULATION_OF_CELL_CYCLE_G2_M_PHASE_TRANSITION	215	0.479102	1.51834	0.0434783	1	1	22475	tags=63%, list=40%, signal=38%	PSMA8/PHOX2B/KCNH5/STOX1/TUBB4A/CLSPN/CDC25C/ORC1/NEK2/DTL/ATAD5/TICRR/CHEK1/CDC7/CDC25A/PLK1/CCNB3/PLK4/CDC6/FBXO5/CEP78/BRCA1/CENPF/PSMB11/KIF14/AURKB/GTSE1/HMMR/BLM/TPX2/DONSON/CEP72/DBF4B/AURKA/RAD51C/HAUS5/CEP76/CEP152/HAUS7/CDK1/NINL/HAUS8/CDK2/NDE1/CCP110/WNT10B/TOPBP1/HAUS6/CENPJ/CDK5RAP2/CEP131/CNTRL/HAUS1/CDC25B/PSMB9/PRKAR2B/CCNB1/CEP70/BRCC3/CEP250/ALMS1/HAUS4/ODF2/PAXIP1/PSMD11/PSMA2…
GOBP_RESPONSE_TO_CARBOHYDRATE	GOBP_RESPONSE_TO_CARBOHYDRATE	219	0.388553	1.23774	0.0434783	1	1	9796	tags=12%, list=17%, signal=10%	NEUROD1/LIN28A/GCG/TRH/PAX2/PCK1/UCN3/PRLH/NR0B2/NKX2-2/FOXA2/KCNJ11/PKLR/BRSK2/PDX1/FGF21/ILDR2/CASR/COL4A3/GATA4/ADCY8/CDT1/KHK/CFTR/CLTRN/HNF4A/RMI1
GOBP_RNA_LOCALIZATION	GOBP_RNA_LOCALIZATION	233	0.396264	1.26483	0.0434783	1	1	24074	tags=67%, list=43%, signal=39%	NXF2B/LUZP4/NXF5/DDX25/POM121L12/RBFOX1/NUP62CL/POM121L2/IGF2BP3/NUP210/NXF2/IGF2BP2/KIF5C/RANBP17/IGF2BP1/NUP155/EXOSC2/MAGOHB/THOC1/NUP188/EXOSC3/NUP85/SEH1L/WRAP53/UPF3B/ZNHIT3/ALYREF/CPSF4/RUVBL1/NDC1/NUP214/GLE1/SENP2/FMR1/NXT2/PRPF18/SLBP/XPO5/NUP205/NUP93/NCBP1/NUP160/EIF4A3/CPSF3/NUP107/POLR2D/UPF3A/FIP1L1/NXT1/NUP153/RBM8A/MAGOH/ZNHIT6/ENY2/NUP37/DDX39A/LSG1/CKAP5/MEX3D/DKC1/UPF2/NUP54/S…
GOBP_SENSORY_PERCEPTION_OF_LIGHT_STIMULUS	GOBP_SENSORY_PERCEPTION_OF_LIGHT_STIMULUS	217	0.392409	1.24584	0.0434783	1	1	12779	tags=26%, list=23%, signal=20%	CABP2/CLRN1/GRK1/CRYGA/PAX2/SOX14/GJA10/MYO3A/USH2A/CRYGB/CLDN19/RLBP1/RAX/CRYBA2/COL2A1/PCDH15/CHRNB2/RGR/PDE6H/RHO/CRYBA4/AIPL1/NYX/RGS9BP/NR2E1/SLC4A10/SFRP5/RIMS1/PAX6/CPLX3/CRX/USH1C/USH1G/POU4F3/CRB1/GUCA1A/FAM161A/OPN5/GNAT1/ZIC2/SIX3/TULP2/CLIC5/SEMA5B/GRK7/RPGRIP1/CRYBB2/GJC1/PRPH2/MYO7A/GRM8/GUCY2F/VSX1/RP1/PDE6A/CNGB1
GOCC_ACTIN_BASED_CELL_PROJECTION	GOCC_ACTIN_BASED_CELL_PROJECTION	214	0.398706	1.26992	0.0434783	1	1	10228	tags=12%, list=18%, signal=10%	GRXCR1/CLRN1/ANKS4B/CLCA1/MYO3A/USH2A/AQP5/LHFPL5/VIL1/PROM1/PCDH15/CDHR2/ACTN2/PDZK1/SPEF1/GRXCR2/LY6G6D/MYO1A/USH1C/CRB1/NLGN1/MYO1H/TSPEAR/OXTR/TMC2
GOCC_CHROMOSOMAL_REGION	GOCC_CHROMOSOMAL_REGION	344	0.442186	1.44487	0.0434783	1	1	18795	tags=50%, list=33%, signal=33%	SYCP1/H2BC1/DYDC1/DYDC2/SMC1B/BOD1L2/H4C14/DMC1/SPO11/H4C15/STAG3/KIF2B/SGO1/H4C12/OIP5/CENPI/CENPA/ORC1/TERT/NEK2/RAD51AP1/KIF18A/SPC25/MEIKIN/NUF2/NDC80/CHEK1/CDT1/CENPK/SKA1/EZH2/MAJIN/KNL1/MAD2L1/PIF1/TTK/PLK1/CDCA5/SPC24/H2AC1/MCM2/ESCO2/DSCC1/SKA3/RAD51/ERCC6L/KNTC1/CENPL/CENPU/HELLS/NCAPG/H4C9/MTBP/CENPF/BUB1B/CENPP/KIF2C/AURKB/BUB1/CDCA8/HJURP/SPAG5/H4C8/BIRC5/BLM/CENPO/DNA2/KDM4D/DSN1/SG…
GOCC_CONDENSED_CHROMOSOME	GOCC_CONDENSED_CHROMOSOME	216	0.504873	1.59756	0.0434783	1	1	18812	tags=56%, list=33%, signal=38%	SYCP1/FAM9A/FAM9B/SMC1B/BOD1L2/DMC1/HORMAD2/STAG3/KIF2B/FAM9C/SYCE2/RAD9B/SGO1/CENPA/NEK2/SPC25/MEIKIN/NUF2/NDC80/CHEK1/CDT1/CENPK/SYCP2/SKA1/MEI4/RAD21L1/KNL1/MAD2L1/PLK1/SPC24/SKA3/RAD51/ERCC6L/KNTC1/CENPU/BRCA1/NCAPG/CENPF/BUB1B/KIF2C/AURKB/BUB1/HJURP/SPAG5/BIRC5/SMC2/BLM/CENPO/DSN1/SGO2/MKI67/FKBP6/CENPE/FANCD2/ZWINT/CENPN/CENPM/BRCA2/KNSTRN/TOP2A/SUV39H1/ITGB3BP/HMGB2/CENPW/INCENP/CENPH/NDE1…
GOCC_EXOCYTIC_VESICLE	GOCC_EXOCYTIC_VESICLE	216	0.420566	1.33079	0.0434783	1	1	11362	tags=16%, list=20%, signal=13%	GAD2/SLC17A6/SLC32A1/DDC/SYNPR/SYT4/SYT13/SLC17A8/SYNGR4/SVOP/KIF1A/GRIN2A/SYT6/SYT10/SLC30A3/SH3GL2/DOC2A/SYP/BSN/CPLX3/CTTNBP2/SV2B/STX19/UNC13A/SYT12/SYN3/STX1B/SLC4A8/SNAP25/SNAP91/DRD2/GRIN1/SYN2/MME/SYNGR3
GOCC_SPINDLE	GOCC_SPINDLE	377	0.425044	1.39604	0.0434783	1	1	21834	tags=54%, list=39%, signal=33%	CETN1/BOD1L2/NEXMIF/BIRC8/DCDC1/KIF2B/WDR62/HASPIN/HEPACAM2/KIF15/SGO1/FAM161A/NEK2/ESPL1/KIF18A/SEPTIN12/CDC7/TUBB8/KIF18B/CKAP2L/SKA1/IL17RB/SPAG8/MAD2L1/ASPM/TTK/PLK1/AUNIP/KIFC1/PLK4/STX1B/SKA3/CDC6/KIF4A/FBXO5/KNTC1/CENPF/DLGAP5/PSRC1/KIF14/BUB1B/GPSM2/KIF2C/AURKB/DNAAF1/ECT2/CDCA8/CEP128/POC1A/SPAG5/BIRC5/TPX2/KIF23/PRC1/CAPN6/SHCBP1/NUSAP1/CENPE/AURKA/KIF11/HAUS5/KNSTRN/RACGAP1/HAUS7/FBF1/…
GOMF_PEPTIDOGLYCAN_BINDING	GOMF_PEPTIDOGLYCAN_BINDING	18	0.741144	1.68068	0.0434783	1	1	7077	tags=39%, list=13%, signal=34%	REG1B/REG3G/REG3A/ZG16/PGLYRP2/REG1A/PGLYRP4
HP_MIXED_DEMYELINATING_AND_AXONAL_POLYNEUROPATHY	HP_MIXED_DEMYELINATING_AND_AXONAL_POLYNEUROPATHY	15	0.800256	1.73471	0.0434783	1	1	43	tags=7%, list=0%, signal=7%	MT-TQ
HP_OCULAR_ANTERIOR_SEGMENT_DYSGENESIS	HP_OCULAR_ANTERIOR_SEGMENT_DYSGENESIS	293	0.389775	1.27391	0.0434783	1	1	14991	tags=21%, list=27%, signal=16%	MIR184/MT-TQ/KCNA4/GJA8/SLC38A8/CRYGB/CRYBA2/MIR204/COL2A1/ATOH7/FGF3/PAX6/BRIP1/LRP2/FANCA/MAB21L1/DLX6/XRCC2/FANCB/FANCC/FOXE3/TRIP13/RAD51/BRCA1/NCAPG2/PITX3/CENPF/WT1/PHGDH/SALL4/RPGRIP1/CRYBB2/FANCE/FANCI/FANCD2/RECQL4/UBE2T/CEP55/BRCA2/RAD51C/FANCG/PYCR1/VSX1/HMX1/NSD2/RNASEH2A/WNT10B/TWIST1/CRYGC/LMX1B/ERCC4/CRYBB3/MAD2L2/RBP4/POMT1/DLX5/RFC2/TMEM107/NUP188/PALB2/FANCM/RFWD3
GOBP_DENSE_CORE_GRANULE_TRANSPORT	GOBP_DENSE_CORE_GRANULE_TRANSPORT	10	0.787676	1.57611	0.0444444	1	1	3482	tags=20%, list=6%, signal=19%	SYT4/KIF1A
GOBP_GANGLION_DEVELOPMENT	GOBP_GANGLION_DEVELOPMENT	16	0.78755	1.70978	0.0444444	1	1	3478	tags=25%, list=6%, signal=23%	POU4F2/INSM1/ASCL1/PHOX2B
GOBP_MIRNA_CATABOLIC_PROCESS	GOBP_MIRNA_CATABOLIC_PROCESS	10	0.786592	1.57394	0.0444444	1	1	6409	tags=20%, list=11%, signal=18%	LIN28A/LIN28B
HP_CONCENTRIC_HYPERTROPHIC_CARDIOMYOPATHY	HP_CONCENTRIC_HYPERTROPHIC_CARDIOMYOPATHY	16	0.789562	1.71415	0.0444444	1	1	43	tags=6%, list=0%, signal=6%	MT-TQ
HP_HEPATOCELLULAR_ADENOMA	HP_HEPATOCELLULAR_ADENOMA	17	0.753018	1.65811	0.0444444	1	1	10762	tags=53%, list=19%, signal=43%	NEUROD1/PAX4/HNF1A/INS/KCNJ11/PDX1/HNF4A/CEL/ABCC8
HP_TRANSIENT_NEONATAL_DIABETES_MELLITUS	HP_TRANSIENT_NEONATAL_DIABETES_MELLITUS	16	0.761155	1.65248	0.0444444	1	1	10762	tags=62%, list=19%, signal=51%	NEUROD1/PAX4/HNF1A/INS/KCNJ11/PDX1/ZFP57/HNF4A/CEL/ABCC8
GOBP_INTERLEUKIN_8_PRODUCTION	GOBP_INTERLEUKIN_8_PRODUCTION	101	-0.529835	-1.39901	0.0447761	1	1	9871	tags=12%, list=17%, signal=10%	MIR132/MIR98/ELANE/IL17F/MIR302C/MIR302D/MIR181A2/MIR506/MIR920/MIR520C/MIR520B/MIR100
GOBP_CELL_CYCLE_G2_M_PHASE_TRANSITION	GOBP_CELL_CYCLE_G2_M_PHASE_TRANSITION	272	0.39593	1.25302	0.0454545	1	1	22078	tags=56%, list=39%, signal=34%	PSMA8/PHOX2B/KCNH5/BRSK2/STOX1/TUBB4A/USH1C/CLSPN/CDC25C/CDKN2B/ORC1/NEK2/DTL/ATAD5/TICRR/CHEK1/PKMYT1/CDC7/MELK/CDC25A/PLK1/CCNB3/PLK4/CDC6/FBXO5/CEP78/BRCA1/FOXM1/CENPF/PSMB11/KIF14/AURKB/GTSE1/HMMR/BLM/TPX2/CCNB2/CCNA2/DONSON/CEP72/DBF4B/AURKA/BORA/RAD51C/HAUS5/CEP76/CEP152/HAUS7/CDK1/NINL/HAUS8/CDK2/SKP2/NDE1/CCP110/WNT10B/TOPBP1/HAUS6/MASTL/CENPJ/CDK5RAP2/CEP131/PPM1D/CNTRL/HAUS1/CDC25B/PSMB…
GOBP_CIRCADIAN_RHYTHM	GOBP_CIRCADIAN_RHYTHM	212	0.399006	1.26908	0.0454545	1	1	13240	tags=18%, list=23%, signal=14%	NPS/DDC/GHRH/PROKR2/SOX14/NR0B2/ZPBP2/NPY2R/ATOH7/CHRNB2/DRD3/NMU/NMS/PIWIL2/MAGEL2/SPSB4/TNFRSF11A/PASD1/OPN5/NLGN1/EZH2/HNF4A/TYMS/CIART/DRD2/NKX2-1/C3orf70/PROX1/ADCY1/PRKAA2/CARTPT/TOP2A/SUV39H1/CDK1/SUV39H2/TIMELESS/SRD5A1/DBP/SLC6A4
GOBP_COVALENT_CHROMATIN_MODIFICATION	GOBP_COVALENT_CHROMATIN_MODIFICATION	457	0.372839	1.25995	0.0454545	1	1	21419	tags=43%, list=38%, signal=27%	GCG/CTCFL/ACTL6B/DYDC1/SMYD1/DYDC2/APOBEC1/NOS1/PRDM7/PRDM9/CDY2A/MYB/PRDM14/AICDA/ZNF541/PIWIL2/EZHIP/HASPIN/PRDM16/UBE2U/PAX5/CHEK1/PADI2/EZH2/ISL1/PHF19/PADI6/PRDM12/BRCA1/HELLS/KDM4E/TET1/UHRF1/AURKB/CHD5/KDM4D/CCNA2/PRKAA2/DNMT3B/HDAC9/AURKA/RCOR2/BRCA2/BEND3/CPA4/NR1H4/SUV39H1/CDK1/GFI1/VRK1/SUV39H2/CDK2/NSD2/INCENP/USP51/DNMT1/MT3/TWIST1/TAF1L/TAF5/MSL3P1/PAGR1/JADE1/JADE3/KMT5C/CCNB1/APBB…
GOBP_DETECTION_OF_CHEMICAL_STIMULUS	GOBP_DETECTION_OF_CHEMICAL_STIMULUS	495	0.397009	1.35144	0.0454545	1	1	5260	tags=25%, list=9%, signal=23%	OR4K17/OR10H3/OR5D18/OR10G4/OR8J3/OR4K5/OR2T12/OR1S1/OR51A2/OR5AL1/OR51L1/OR4C13/OR5L2/OR6Q1/OR8H3/OR5AR1/OR5M1/OR51G1/OR4C46/OR51H1/OR1A2/OR14C36/OR7D4/OR9G4/OR2T6/OR4C15/OR7E24/OR52M1/OR2T34/OR5M9/OR52A1/OR10H4/OR4K15/OR1E2/OR5H14/OR2AT4/OR5M10/OR2V1/OR4A5/OR52A4P/OR51S1/OR4B1/OR5B3/OR51T1/OR5K4/OR10J5/OR4C6/OR8K5/OR52Z1/OR1I1/OR2Z1/OR4X2/OR10G6/OR5T1/OR14I1/OR4L1/OR5AK3P/OR5D14/RTP1/OR4D11/OR2…
GOBP_DNA_REPLICATION	GOBP_DNA_REPLICATION	280	0.478455	1.52601	0.0454545	1	1	19002	tags=51%, list=34%, signal=34%	KHDC3L/STRA8/AICDA/MCIDAS/OOEP/RMI2/CCNE2/RAD9B/FAM111B/NT5M/BRIP1/CLSPN/EME1/CHAF1B/E2F7/MCM10/ORC1/EXO1/DTL/POLE2/ATAD5/TICRR/PRIM1/GINS2/CHEK1/CDT1/CDC7/POLQ/GINS1/GINS4/CDC45/PIF1/MCM2/ESCO2/WDHD1/DSCC1/TRAIP/RMI1/RAD51/CDC6/ORC6/FBXO5/BRCA1/BARD1/MMS22L/RFC4/E2F8/CCNE1/PCLAF/MCM8/BLM/DNA2/CCNA2/DONSON/GINS3/SLFN11/DBF4B/RECQL4/ZGRF1/FEN1/POLE/PRIM2/RPA3/RRM2/BRCA2/TIPIN/RFC3/POLA1/POLA2/MCM6…
GOBP_EMBRYONIC_AXIS_SPECIFICATION	GOBP_EMBRYONIC_AXIS_SPECIFICATION	36	0.608632	1.45394	0.0454545	1	1	10431	tags=28%, list=18%, signal=23%	NEUROG1/MESP2/MESP1/TBXT/COBL/RIPPLY1/CITED1/STIL/WT1/LHX1
GOBP_GLIAL_CELL_DIFFERENTIATION	GOBP_GLIAL_CELL_DIFFERENTIATION	209	0.365987	1.17325	0.0454545	1	1	10758	tags=15%, list=19%, signal=12%	LIN28A/GSX2/SOX1/PAX2/POU3F2/ASCL1/OPALIN/NKX2-2/PHOX2B/MIR181C/CSPG5/MOBP/DRD3/TTBK1/NR2E1/OLIG1/GCM1/CRB1/IFNG/TP73/NOG/DLX2/RELN/MMP24/SOX2/DNER/PTN/ADAM22/NKX2-1/PHGDH/CDKN2C/GPR37L1
GOBP_MITOTIC_NUCLEAR_DIVISION	GOBP_MITOTIC_NUCLEAR_DIVISION	296	0.467329	1.52945	0.0454545	1	1	17116	tags=39%, list=30%, signal=27%	NEUROG1/UBE2DNL/SMC1B/INS/DMRT1/DRD3/FBXO43/FGF8/HASPIN/CDC25C/SGO1/NEK2/ESPL1/KIF18A/NUF2/NDC80/CHEK1/PKMYT1/CDT1/CENPK/KIF18B/USP44/RAD21L1/MAD2L1/TTK/PLK1/CDCA5/KIFC1/KIF4B/DSCC1/TRIP13/MYBL2/CDC6/PDXP/KIF4A/FBXO5/KNTC1/NCAPG2/NCAPH/NCAPG/MTBP/CENPF/DLGAP5/PSRC1/KIF14/BUB1B/KIF2C/AURKB/BUB1/CDCA8/SPAG5/SMC2/TPX2/CCNB2/KIF23/PRC1/DSN1/NUSAP1/SGO2/MKI67/CENPE/ZWINT/AURKA/KIF11/BORA/KNSTRN/RACGAP…
GOBP_N_GLYCAN_PROCESSING	GOBP_N_GLYCAN_PROCESSING	19	0.73932	1.67783	0.0454545	1	1	5141	tags=16%, list=9%, signal=14%	ST8SIA3/ST8SIA2/ST8SIA5
GOBP_NCRNA_METABOLIC_PROCESS	GOBP_NCRNA_METABOLIC_PROCESS	490	0.397145	1.34425	0.0454545	1	1	24058	tags=60%, list=43%, signal=35%	CT45A9/LIN28A/TRIM71/SAGE2P/TDRD1/MAEL/DDX4/CT45A1/ASZ1/SLFN13/LIN28B/TDRD9/PIWIL2/CT45A10/TDRD12/TDRKH/GPAT2/SAGE1/MYBL1/CDKAL1/FKBP6/SUV39H1/METTL4/PIH1D2/EXOSC2/PLD6/EXD1/HENMT1/PIWIL4/DUS4L/LAGE3/RCL1/EXOSC3/CT45A3/CSTF2/EXOSC9/METTL6/ZNHIT3/TSEN54/TRMT2B/CPSF4/PIN4/GTPBP3/PARS2/LSM6/METTL2A/EEF1E1/TARS2/ERI2/DROSHA/C9orf64/RPP21/MRM2/ELAC1/RC3H2/POP4/DARS2/ISG20/TRDMT1/INTS7/XPO5/REXO4/CDK5R…
GOBP_PROTEIN_DNA_COMPLEX_SUBUNIT_ORGANIZATION	GOBP_PROTEIN_DNA_COMPLEX_SUBUNIT_ORGANIZATION	276	0.428011	1.35761	0.0454545	1	1	15963	tags=36%, list=28%, signal=26%	TSPY4/H2AB2/H2BC1/H4C7/H2AB3/TSPY10/H1-8/H2AB1/BRDT/TSPY1/H4C14/DMC1/PRDM9/H4C15/TSPY3/H2BC17/H1-6/H2BC11/H2BW2/H3C8/H2BW1/CHAF1B/H4C12/OIP5/CENPI/CENPA/SETSIP/H3C15/CDT1/CENPK/CDC45/KNL1/H2BC19P/NFE2/MCM2/RAD51/NAP1L6P/H3C10/CENPL/CENPU/HELLS/H4C9/CENPF/DLGAP5/ASF1B/TAF7L/CENPP/HJURP/H4C8/CENPO/CHD5/H2BC15/H3C12/CENPE/CENPN/H2BS1/CENPM/RPA3/RAD51C/MCM6/H2BU1/MCM5/ITGB3BP/GTF2H4/CENPQ/HMGB2/H2BC2…
GOBP_REGULATION_OF_CHROMOSOME_ORGANIZATION	GOBP_REGULATION_OF_CHROMOSOME_ORGANIZATION	272	0.452337	1.43153	0.0454545	1	1	22073	tags=51%, list=39%, signal=31%	GCG/UBE2DNL/MOS/APOBEC1/NOS1/PRDM9/MYB/AICDA/RMI2/PIWIL2/NEK2/ESPL1/NDC80/CDT1/SLX1B/ISL1/USP44/MAD2L1/PHF19/PIF1/TTK/PLK1/CDCA5/MCM2/TRIP13/CDC6/PRDM12/FBXO5/KNTC1/BRCA1/CENPF/TET1/DLGAP5/BUB1B/AURKB/PKIB/BUB1/DNMT3B/CENPE/ZWINT/FEN1/TOP2A/CDC20/UBE2C/XRCC3/SHCBP1L/PTTG1/SLF1/DNMT1/CDK5RAP2/ERCC4/GEN1/MAD2L2/DDX11/TACC3/CCNB1/SPDL1/ARRB1/RPS6KA5/TEX14/PAXIP1/ACD/CENPV/ZW10/WDR5/MAPK3/FMR1/MAD1L1…
GOBP_REGULATION_OF_PEPTIDE_HORMONE_SECRETION	GOBP_REGULATION_OF_PEPTIDE_HORMONE_SECRETION	209	0.363585	1.16555	0.0454545	1	1	12090	tags=18%, list=21%, signal=14%	NEUROD1/GCG/GHRH/TRH/UCN3/NR0B2/KCNC2/FOXA2/INS/CACNA1E/ENHO/KCNJ11/NMU/FFAR1/BRSK2/PDX1/CNR1/CASR/ADCY8/IFNG/GHSR/CHGA/ISL1/CFTR/CLTRN/HNF4A/FFAR2/GLP1R/SNAP25/DRD2/OXCT1/ABCC8/KALRN/SLC30A8/NKX6-1/CACNA1A/CARTPT/NR1H4
GOBP_SENSORY_PERCEPTION_OF_SMELL	GOBP_SENSORY_PERCEPTION_OF_SMELL	441	0.426686	1.4266	0.0454545	1	1	5260	tags=28%, list=9%, signal=26%	OR4K17/OR10H3/OR5D18/OR10G4/OR8J3/OR4K5/OR2T12/OR1S1/OR51A2/OR5AL1/OR51L1/OR4C13/OR5L2/OR6Q1/OR8H3/OR5AR1/OR5M1/OR51G1/OR4C46/OR51H1/OR1A2/OR14C36/OR7D4/OR9G4/OR2T6/OR4C15/CNGA2/OR7E24/OR52M1/OR2T34/OR5M9/OR52A1/OR10H4/OR4K15/OR1E2/OR5H14/OR2AT4/OR5M10/OR2V1/OR4A5/OR52A4P/OR51S1/OR4B1/OR5B3/OR51T1/OR5K4/OR10J5/OR4C6/OR8K5/OR52Z1/OR1I1/OR2Z1/OR4X2/OR10G6/OR5T1/OR14I1/OR4L1/OR5AK3P/OR5D14/OR4D11/OR…
GOBP_SIGNAL_RELEASE	GOBP_SIGNAL_RELEASE	474	0.35748	1.20439	0.0454545	1	1	12090	tags=19%, list=21%, signal=15%	NEUROD1/GAD2/GCG/SLC32A1/GHRH/HTR1A/NPVF/TRH/SYT4/SYT13/UCN3/SLC22A2/HRH3/RIMS4/NR0B2/KCNC2/HNF1A/FOXA2/INS/NPY2R/CSPG5/CACNA1E/MYB/ENHO/GPR119/KCNJ11/CHRNB2/FGF23/SYT6/DRD3/NMU/FFAR1/BRSK2/SYT10/NRXN1/GAD1/PDX1/CNR1/RIMS1/ILDR2/DOC2A/SYP/POMC/CPLX3/TAC1/CASR/STX19/TNFRSF11A/UNC13A/ADCY8/IFNG/GHSR/CHGA/NLGN1/SYT12/ADRA2B/LIN7A/SYN3/ISL1/CFTR/CLTRN/SLC16A10/HNF4A/STX1B/FFAR2/SLC4A8/OXTR/CADPS/GLP1…
GOBP_SPINAL_CORD_PATTERNING	GOBP_SPINAL_CORD_PATTERNING	19	0.740829	1.68125	0.0454545	1	1	4190	tags=37%, list=7%, signal=34%	LHX3/SOX1/FOXN4/ASCL1/DBX1/NKX2-2/RFX4
GOCC_POSTSYNAPTIC_MEMBRANE	GOCC_POSTSYNAPTIC_MEMBRANE	264	0.397207	1.24908	0.0454545	1	1	11335	tags=23%, list=20%, signal=19%	GABRA1/CACNG2/HTR5A/HTR3B/GABRA5/CDH9/SHISA9/SLITRK1/HTR3A/GABRA4/PCDH8/LHFPL4/CNKSR2/GABRB2/GRM5/KCNC2/SORCS3/GRM3/SHISA8/DCC/GRIN2A/GABRG3/KCNA1/GLRA2/GRIA2/GABRA6/CSPG5/ACTN2/CHRNB2/DRD3/ATP2B2/CHRM4/ERBB4/CNIH2/GABRB1/GRID2/PTPRT/CACNG5/GRIN2C/CACNG4/CHRM5/GABBR2/SLITRK2/GABRP/DNM1/GABRQ/NLGN1/CHRNB3/LIN7A/GRID1/CDH10/ADAM22/DDN/DRD2/GRIN1/KCNJ4/CHRNA5/NETO1/ADCY1/KCTD8/LRFN2
GOCC_PRESYNAPSE	GOCC_PRESYNAPSE	487	0.403459	1.35879	0.0454545	1	1	11362	tags=18%, list=20%, signal=15%	GAD2/SLC17A6/SLC32A1/PDYN/DDC/SCGN/GHRH/SYNPR/SLC6A5/KCNC1/GABRA5/CDH9/HTR3A/PCDH8/SYT4/ATCAY/UCN3/SLC17A8/SLC22A2/SYNGR4/HRH3/RIMS4/USH2A/KCNC2/SVOP/KIF1A/GRM3/GRIN2A/KCNA1/SEPTIN3/KCNJ3/SYT6/SLC1A2/ATP2B2/C1QL1/NMU/SYT10/CNTNAP4/NRXN1/ERBB4/GAD1/SLC30A3/SH3GL2/KCNK2/SLC4A10/CNR1/RIMS1/DOC2A/SYP/BSN/CPLX3/CTTNBP2/SV2B/CASR/STX19/CALCA/UNC13A/ADCY8/CDK5R1/DNM1/NLGN1/SYT12/SCN2A/LIN7A/SYN3/ARHGAP4…
GOCC_TRANSPORT_VESICLE	GOCC_TRANSPORT_VESICLE	399	0.393115	1.30515	0.0454545	1	1	10285	tags=11%, list=18%, signal=9%	GAD2/SLC17A6/SLC32A1/NRSN1/CLRN1/DDC/DEFA5/SCGN/SYNPR/SCG3/SYT4/SYT13/SLC17A8/SYNGR4/SVOP/KIF1A/GRIN2A/INS/AQP2/SYT6/PCSK2/SYT10/CNIH2/SYCN/SLC30A3/SH3GL2/DOC2A/SYP/BSN/CPLX3/CTTNBP2/SV2B/STX19/UNC13A/CHGA/FOLR1/SYT12/SYN3/CA4/STX1B/SLC4A8/SNAP25/SNAP91/DRD2
GOMF_DELAYED_RECTIFIER_POTASSIUM_CHANNEL_ACTIVITY	GOMF_DELAYED_RECTIFIER_POTASSIUM_CHANNEL_ACTIVITY	33	0.679873	1.63243	0.0454545	1	1	4130	tags=27%, list=7%, signal=25%	KCNA4/KCNC1/KCNG4/KCNA10/KCNC2/KCNG3/KCNA1/KCNB2/KCNQ2
GOMF_OLFACTORY_RECEPTOR_ACTIVITY	GOMF_OLFACTORY_RECEPTOR_ACTIVITY	417	0.424776	1.4165	0.0454545	1	1	5260	tags=29%, list=9%, signal=26%	OR4K17/OR10H3/OR5D18/OR10G4/OR8J3/OR4K5/OR2T12/OR1S1/OR51A2/OR5AL1/OR51L1/OR4C13/OR5L2/OR6Q1/OR8H3/OR5AR1/OR5M1/OR51G1/OR4C46/OR51H1/OR1A2/OR14C36/OR7D4/OR9G4/OR2T6/OR4C15/OR7E24/OR52M1/OR2T34/OR5M9/OR52A1/OR10H4/OR4K15/OR1E2/OR5H14/OR2AT4/OR5M10/OR2V1/OR4A5/OR52A4P/OR51S1/OR4B1/OR5B3/OR51T1/OR5K4/OR10J5/OR4C6/OR8K5/OR52Z1/OR1I1/OR2Z1/OR4X2/OR10G6/OR5T1/OR14I1/OR4L1/OR5AK3P/OR5D14/OR4D11/OR2M7/OR…
GOMF_SEROTONIN_RECEPTOR_ACTIVITY	GOMF_SEROTONIN_RECEPTOR_ACTIVITY	33	0.671467	1.61225	0.0454545	1	1	7496	tags=42%, list=13%, signal=37%	OR10H3/OR10H4/HTR5A/OR10J5/HTR1A/HRH3/OR10H5/OR10J6P/HTR1D/OR10H2/CHRM4/HTR6/OR5T2/CHRM5
GOMF_UBIQUITIN_LIKE_PROTEIN_LIGASE_ACTIVITY	GOMF_UBIQUITIN_LIKE_PROTEIN_LIGASE_ACTIVITY	305	0.406639	1.33001	0.0454545	1	1	9338	tags=10%, list=17%, signal=9%	TRIM64/TRIM49D2/TRIM51/TRIM71/TRIM48/TRIM49C/ZSWIM2/RAG2/TRIM49B/ASB4/TRIM64B/TRIML1/SIAH3/TRIM75P/BIRC8/TRIM64C/RNF157/TRIM43/TRIM60/TRIM49/ZNRF4/DCST1/RNF165/MKRN3/NEURL3/TRIML2/TRIM15/RNFT2/TRIM43B/HERC5/RNF148/BSPRY
HP_ABNORMAL_LIGHT_AND_DARK_ADAPTED_ELECTRORETINOGRAM	HP_ABNORMAL_LIGHT_AND_DARK_ADAPTED_ELECTRORETINOGRAM	36	0.554711	1.32513	0.0454545	1	1	5572	tags=17%, list=10%, signal=15%	CLRN1/RLBP1/PROM1/RGR/RHO/AIPL1
HP_ABNORMALITY_OF_THE_CURVATURE_OF_THE_CORNEA	HP_ABNORMALITY_OF_THE_CURVATURE_OF_THE_CORNEA	267	0.403829	1.27115	0.0454545	1	1	15493	tags=25%, list=27%, signal=18%	MIR184/CLRN1/ACTL6B/MYT1L/USH2A/CLDN19/RLBP1/NEUROD2/PROM1/RGR/RHO/AIPL1/CHST6/CRX/BRIP1/FANCA/CRB1/FAM161A/NEK2/XRCC2/FANCB/FANCC/FOXE3/CA4/DOCK3/RAD51/CEP78/BRCA1/SLC7A14/RPGRIP1/FANCE/FANCI/PRPH2/FANCD2/KIF11/UBE2T/BRCA2/RAD51C/FANCG/VSX1/RP1/PDE6A/CNGB1/TBC1D7/MAG/LMX1B/KIAA1549/ERCC4/OVOL2/CCDC28B/GLRB/MAD2L2/RD3/GPR143/TULP1/RFC2/LOXL3/SLC39A8/PALB2/FANCM/RFWD3/TUB/TRIM37/PITX2/NRL/PRPF3
HP_FUNCTIONAL_ABNORMALITY_OF_MALE_INTERNAL_GENITALIA	HP_FUNCTIONAL_ABNORMALITY_OF_MALE_INTERNAL_GENITALIA	212	0.399056	1.26924	0.0454545	1	1	15123	tags=36%, list=27%, signal=27%	BPY2/PRY2/SOHLH1/PROKR2/DNAI1/BRDT/CFAP65/NR5A1/TEX15/TSPY1/AIRE/TTC29/ZMYND10/FSHB/SPINK2/CDY2A/RBMY1A1/MCIDAS/TDRD9/FGF8/CFAP221/BRIP1/NANOS1/FANCA/DNAH8/SUN5/GATA4/DRC1/DAZ3/XRCC2/FANCB/FANCC/SYCP2/ADGRG2/DNAAF3/CFTR/RAD51/BRCA1/WT1/DNAAF1/POC1A/SPEF2/MCM8/BLM/FANCE/KISS1/MEIOB/FANCI/FANCD2/UBE2T/ANK1/BRCA2/RAD51C/FANCG/HYDIN/POLA1/SOX3/HJV/CEP19/ZMYND15/ERCC4/FOXJ1/RSPH1/MAD2L2/CCDC40/RFC2/TA…
HP_HYPOINSULINEMIA	HP_HYPOINSULINEMIA	19	0.74183	1.68353	0.0454545	1	1	10762	tags=53%, list=19%, signal=43%	NEUROD1/PAX4/HNF1A/INS/KCNJ11/PDX1/ZFP57/HNF4A/CEL/ABCC8
HP_HYPOPLASIA_OF_THE_CORPUS_CALLOSUM	HP_HYPOPLASIA_OF_THE_CORPUS_CALLOSUM	475	0.357171	1.2068	0.0454545	1	1	20973	tags=35%, list=37%, signal=22%	MT-TQ/DCX/CACNG2/ACTL6B/GABRA5/MYT1L/CTNNA2/UNC80/OCA2/KIF1A/GRIN2A/NEUROD2/KCNA1/KCNQ2/FMN2/CAMK2B/NEXMIF/SLC1A2/TUBB2B/VWA3B/BRSK2/GABRB1/GAD1/PAX6/WDR62/POU3F3/FRRS1L/KCNQ5/SCN2A/RELN/ASPM/SOX2/WT1/PHGDH/BUB1B/GPSM2/GRIN1/MED12L/PCLO/SOX11/FANCD2/KIF5C/GNAO1/RAC3/CLCN4/GRM7/SOX3/SLC1A4/GRIA3/AP3B2/TUBB2A/RNASEH2A/HPDL/FA2H/GPT2/TUBB3/GRIA4/PRSS12/POMT1/PSAT1/RTTN/NUP188/EBP/KCNK4/ARSI/FOXG1/PI…
HP_MOTOR_SEIZURE	HP_MOTOR_SEIZURE	298	0.396566	1.30507	0.0454545	1	1	6251	tags=8%, list=11%, signal=7%	MT-TQ/DCX/GABRA1/CACNG2/ACTL6B/HCN1/GABRA5/MYT1L/KIF1A/GRIN2A/NEUROD2/KCNA1/SCN1A/INS/KCNQ2/GRIA2/FMN2/CAMK2B/KCNJ11/NEXMIF/BRSK2/GAD1/PDX1
HP_SIDEROBLASTIC_ANEMIA	HP_SIDEROBLASTIC_ANEMIA	33	0.59501	1.42867	0.0454545	1	1	14991	tags=58%, list=27%, signal=42%	BRIP1/FANCA/XRCC2/FANCB/FANCC/RAD51/BRCA1/FANCE/FANCI/FANCD2/UBE2T/BRCA2/RAD51C/FANCG/ERCC4/MAD2L2/PALB2/FANCM/RFWD3
GOBP_POSITIVE_REGULATION_OF_MEIOTIC_CELL_CYCLE	GOBP_POSITIVE_REGULATION_OF_MEIOTIC_CELL_CYCLE	22	0.684346	1.56566	0.0465116	1	1	9599	tags=50%, list=17%, signal=42%	STRA8/PRDM7/PRDM9/DMRT1/OOEP/PIWIL2/TOPAZ1/CDC25C/RAD51AP1/CDC25A/MEIOC
HP_MATURITY_ONSET_DIABETES_OF_THE_YOUNG	HP_MATURITY_ONSET_DIABETES_OF_THE_YOUNG	20	0.723721	1.64243	0.0465116	1	1	10762	tags=50%, list=19%, signal=40%	NEUROD1/PAX4/HNF1A/INS/KCNJ11/PDX1/ZFP57/HNF4A/CEL/ABCC8
HP_PSYCHOTIC_MENTATION	HP_PSYCHOTIC_MENTATION	20	0.714944	1.62251	0.0465116	1	1	3797	tags=10%, list=7%, signal=9%	MT-TQ/GRIN2A
GOBP_NEGATIVE_REGULATION_OF_INTERLEUKIN_6_PRODUCTION	GOBP_NEGATIVE_REGULATION_OF_INTERLEUKIN_6_PRODUCTION	60	-0.585038	-1.45569	0.046875	1	1	10002	tags=32%, list=18%, signal=26%	TLR4/CD200R1/MIR149/ORM1/MIR365A/MIR766/MIR708/BPI/IRAK3/NLRP12/MIR132/MIR98/HGF/MIR181A2/MIR101-1/MIR26A1/MIR217/MIR105-1/MIR206
GOBP_REGULATION_OF_CARDIAC_MUSCLE_CONTRACTION_BY_CALCIUM_ION_SIGNALING	GOBP_REGULATION_OF_CARDIAC_MUSCLE_CONTRACTION_BY_CALCIUM_ION_SIGNALING	26	-0.685897	-1.4889	0.046875	1	1	389	tags=27%, list=1%, signal=27%	FKBP1B/CACNA1C/GSTM2/RYR2/CASQ2/ATP1A2/MIR1-1
GOBP_REGULATION_OF_CELLULAR_RESPONSE_TO_VASCULAR_ENDOTHELIAL_GROWTH_FACTOR_STIMULUS	GOBP_REGULATION_OF_CELLULAR_RESPONSE_TO_VASCULAR_ENDOTHELIAL_GROWTH_FACTOR_STIMULUS	26	-0.695139	-1.50896	0.046875	1	1	5010	tags=8%, list=9%, signal=7%	MIR16-1/MIR329-1
GOBP_NUCLEAR_CHROMOSOME_SEGREGATION	GOBP_NUCLEAR_CHROMOSOME_SEGREGATION	271	0.532265	1.66454	0.047619	1	1	14509	tags=39%, list=26%, signal=29%	UBE2DNL/SYCP1/MOS/MAEL/TEX15/SMC1B/DMC1/PRDM9/FMN2/SPO11/HORMAD2/STAG3/RMI2/KIF2B/CCNE2/SYCE2/DDX11L8/BRIP1/HASPIN/EME1/SGO1/NEK2/ESPL1/KIF18A/MEIKIN/SPATA22/NUF2/NDC80/CDT1/CENPK/SYCP2/KIF18B/MEI4/USP44/MAJIN/RAD21L1/KNL1/MAD2L1/TTK/PLK1/CDCA5/MEIOC/KIFC1/ESCO2/KIF4B/DSCC1/TRIP13/RMI1/CDC6/KIF4A/FBXO5/KNTC1/NCAPG2/NCAPH/NCAPG/CENPF/DLGAP5/PSRC1/KIF14/BUB1B/KIF2C/AURKB/CCNE1/ECT2/BUB1/CDCA8/SPAG5…
GOBP_REGULATION_OF_CHOLESTEROL_EFFLUX	GOBP_REGULATION_OF_CHOLESTEROL_EFFLUX	41	-0.645516	-1.49652	0.047619	1	1	11264	tags=24%, list=20%, signal=20%	CES1/MIR27B/MIR301B/MIR302A/ABCA8/MIR27A/SHH/MIR128-1/MIR26A1/MIR758
GOBP_REGULATION_OF_ENDOTHELIAL_CELL_DIFFERENTIATION	GOBP_REGULATION_OF_ENDOTHELIAL_CELL_DIFFERENTIATION	42	-0.61909	-1.43979	0.047619	1	1	11421	tags=19%, list=20%, signal=15%	TMEM100/ATOH8/MIR199B/MIR99B/MIR181A2/MIR150/MIR495/MIR1-1
GOBP_SYNAPTONEMAL_COMPLEX_ORGANIZATION	GOBP_SYNAPTONEMAL_COMPLEX_ORGANIZATION	24	0.688599	1.60093	0.047619	1	1	9761	tags=38%, list=17%, signal=31%	SYCP1/SPO11/STAG3/SYCE2/SYCP2/RAD21L1/PLK1/MEIOC/TRIP13
GOCC_SYNAPTIC_MEMBRANE	GOCC_SYNAPTIC_MEMBRANE	367	0.413987	1.35054	0.047619	1	1	11335	tags=24%, list=20%, signal=19%	GAD2/GABRA1/CACNG2/HTR5A/SLC6A5/KCNC1/HTR3B/GABRA5/CDH9/SHISA9/SLITRK1/HTR3A/GABRA4/PCDH8/LHFPL4/CNKSR2/GABRB2/GRM5/RIMS4/KCNC2/SORCS3/GRM3/SHISA8/DCC/GRIN2A/GABRG3/KCNA1/GLRA2/GRIA2/GABRA6/CSPG5/ACTN2/CHRNB2/KCNJ3/SYT6/SLC1A2/DRD3/ATP2B2/CHRM4/CNTNAP4/NRXN1/ERBB4/CNIH2/GABRB1/GRID2/PTPRT/CACNG5/CNR1/RIMS1/GRIN2C/SYP/CACNG4/CPLX3/CHRM5/GABBR2/STX19/SLITRK2/GABRP/UNC13A/ADCY8/GHSR/DNM1/GABRQ/NLGN1…
GOCC_U2_SNRNP	GOCC_U2_SNRNP	24	0.693887	1.61322	0.047619	1	1	4649	tags=8%, list=8%, signal=8%	RNU2-1/AC126323.2
GOMF_DNA_BINDING_TRANSCRIPTION_ACTIVATOR_ACTIVITY	GOMF_DNA_BINDING_TRANSCRIPTION_ACTIVATOR_ACTIVITY	444	0.437195	1.45591	0.047619	1	1	13755	tags=23%, list=24%, signal=17%	NEUROD6/ZIC3/NEUROD1/LHX3/POU4F2/ATOH1/NKX6-3/CTCFL/SHOX/SOX1/BARHL1/POU3F2/NEUROG3/MYOG/OTX2/GSX1/NKX2-2/HNF1A/PHOX2B/FEZF2/RAX/AIRE/MESP1/NEUROD2/RFX4/MYB/SP7/MYF5/ZNF729/NR1I2/POU4F1/DMRT1/SPIC/PTF1A/PAX1/IRX6/ONECUT2/NHLH1/NR2E1/ZNF850/GCM1/MSGN1/E2F2/CRX/TLX1/OTX1/E2F1/POU4F3/PRDM16/GATA4/SOX30/TP73/PAX5/POU2F3/EGR4/MYBL1/ONECUT3/DLX2/ISL1/HNF4A/SOX2/MYBL2/SIX3/PITX3/RBPJL/HOXA9/WT1/GBX2/BAR…
HP_ABNORMAL_CIRCULATING_PYRUVATE_FAMILY_AMINO_ACID_CONCENTRATION	HP_ABNORMAL_CIRCULATING_PYRUVATE_FAMILY_AMINO_ACID_CONCENTRATION	42	-0.628712	-1.46217	0.047619	1	1	5582	tags=7%, list=10%, signal=6%	MT-TV/MT-TW/MT-TK
HP_ABNORMAL_PANCREAS_SIZE	HP_ABNORMAL_PANCREAS_SIZE	34	0.633024	1.47111	0.047619	1	1	10762	tags=32%, list=19%, signal=26%	NEUROD1/PAX4/HNF1A/INS/KCNJ11/PTF1A/PDX1/HNF4A/CEL/LHX1/ABCC8
HP_ABNORMALITY_OF_CENTRAL_NERVOUS_SYSTEM_ELECTROPHYSIOLOGY	HP_ABNORMALITY_OF_CENTRAL_NERVOUS_SYSTEM_ELECTROPHYSIOLOGY	478	0.363393	1.21255	0.047619	1	1	9244	tags=9%, list=16%, signal=7%	MT-TQ/DCX/GABRA1/ACTL6B/HCN1/GABRA5/PCK1/CTNNA2/UNC80/CNKSR2/GABRB2/OCA2/KIF1A/GRIN2A/NEUROD2/KCNA1/SCN1A/KCNQ2/CNTNAP2/FMN2/CACNA1E/KCNJ11/NEXMIF/SLC1A2/DRD3/DAOA/NRXN1/CTNND2/GABRB1/GAD1/SCN8A/CUX2/PAX6/GABBR2/PRDM16/FRRS1L/DNM1/ADRA2B/SCN2A/RTN4R/DIAPH3
GOBP_NEGATIVE_REGULATION_OF_CELL_JUNCTION_ASSEMBLY	GOBP_NEGATIVE_REGULATION_OF_CELL_JUNCTION_ASSEMBLY	31	-0.671473	-1.51223	0.0483871	1	1	179	tags=10%, list=0%, signal=10%	FAM107A/ARHGAP6/MIR105-1
GOBP_REGULATION_OF_INFLAMMATORY_RESPONSE_TO_ANTIGENIC_STIMULUS	GOBP_REGULATION_OF_INFLAMMATORY_RESPONSE_TO_ANTIGENIC_STIMULUS	29	-0.674748	-1.47604	0.0483871	1	1	179	tags=10%, list=0%, signal=10%	GPR17/ADCYAP1/MIR105-1
GOBP_ANTERIOR_POSTERIOR_AXIS_SPECIFICATION	GOBP_ANTERIOR_POSTERIOR_AXIS_SPECIFICATION	49	0.554153	1.40819	0.0487805	1	1	7078	tags=16%, list=13%, signal=14%	NEUROG1/MESP2/OTX2/MESP1/FOXA2/TBXT/WNT8A/RIPPLY1
GOBP_DNA_DEPENDENT_DNA_REPLICATION_MAINTENANCE_OF_FIDELITY	GOBP_DNA_DEPENDENT_DNA_REPLICATION_MAINTENANCE_OF_FIDELITY	49	0.561435	1.42669	0.0487805	1	1	16899	tags=57%, list=30%, signal=40%	KHDC3L/OOEP/EME1/TRAIP/RAD51/MMS22L/BLM/DNA2/DONSON/SLFN11/ZGRF1/POLE/BRCA2/TIPIN/CORT/TIMELESS/TONSL/POLD1/GEN1/CENPS/DDX11/PCNA/THOC1/FANCM/RFWD3/ALYREF/CENPX/SAMHD1
GOBP_NEGATIVE_REGULATION_OF_OSTEOBLAST_DIFFERENTIATION	GOBP_NEGATIVE_REGULATION_OF_OSTEOBLAST_DIFFERENTIATION	48	0.621099	1.5735	0.0487805	1	1	1733	tags=6%, list=3%, signal=6%	MIR208A/UCMA/MIR9-1
GOCC_GABA_ERGIC_SYNAPSE	GOCC_GABA_ERGIC_SYNAPSE	64	0.504645	1.41304	0.0487805	1	1	11023	tags=30%, list=20%, signal=24%	SLC32A1/GABRA5/SLITRK1/GABRA4/GABRB2/GABRG3/CSPG5/DRD3/ATP2B2/ERBB4/GABRB1/CNR1/BSN/CBLN4/SLITRK2/CDH10/DRD2/CNTN5/PCLO
GOMF_CARBOHYDRATE_DERIVATIVE_TRANSMEMBRANE_TRANSPORTER_ACTIVITY	GOMF_CARBOHYDRATE_DERIVATIVE_TRANSMEMBRANE_TRANSPORTER_ACTIVITY	52	0.543493	1.41115	0.0487805	1	1	11170	tags=21%, list=20%, signal=17%	SLC17A4/SLC17A3/SLC22A2/SLC28A1/SLC35D3/SLC28A2/SLC5A2/SLC28A3/SLC29A4/SLC5A1/SLC29A2
HP_ABNORMAL_MORPHOLOGY_OF_THE_LIMBIC_SYSTEM	HP_ABNORMAL_MORPHOLOGY_OF_THE_LIMBIC_SYSTEM	64	0.493699	1.38239	0.0487805	1	1	10892	tags=20%, list=19%, signal=16%	GABRA1/CACNG2/MYT1L/KIF1A/DCC/SCN1A/CAMK2B/BRSK2/KCNQ5/SCN2A/RAD51/GRIN1/MED12L
HP_ABNORMALITY_OF_EXOCRINE_PANCREAS_PHYSIOLOGY	HP_ABNORMALITY_OF_EXOCRINE_PANCREAS_PHYSIOLOGY	48	0.591669	1.49894	0.0487805	1	1	10762	tags=27%, list=19%, signal=22%	NEUROD1/PAX4/HNF1A/INS/CDKN2A/KCNJ11/PDX1/CTRC/CFTR/HNF4A/BRCA1/CEL/ABCC8
HP_LANGUAGE_IMPAIRMENT	HP_LANGUAGE_IMPAIRMENT	48	0.572271	1.4498	0.0487805	1	1	4502	tags=6%, list=8%, signal=6%	DCX/TM4SF20/CNTNAP2
HP_PYRIDOXINE_RESPONSIVE_SIDEROBLASTIC_ANEMIA	HP_PYRIDOXINE_RESPONSIVE_SIDEROBLASTIC_ANEMIA	23	0.699198	1.58583	0.0487805	1	1	14991	tags=83%, list=27%, signal=61%	BRIP1/FANCA/XRCC2/FANCB/FANCC/RAD51/BRCA1/FANCE/FANCI/FANCD2/UBE2T/BRCA2/RAD51C/FANCG/ERCC4/MAD2L2/PALB2/FANCM/RFWD3
HP_TYPICAL_ABSENCE_SEIZURE	HP_TYPICAL_ABSENCE_SEIZURE	50	0.551354	1.4215	0.0487805	1	1	10892	tags=22%, list=19%, signal=18%	GABRA1/CACNG2/MYT1L/KIF1A/GRIN2A/CAMK2B/BRSK2/FRRS1L/KCNQ5/GRIN1/MED12L
BRCA
ID	Description	setSize	enrichmentScore	NES	pvalue	p.adjust	qvalues	rank	leading_edge	core_enrichment
GOBP_DETECTION_OF_CHEMICAL_STIMULUS	GOBP_DETECTION_OF_CHEMICAL_STIMULUS	495	-0.618761	-1.39035	0.00990099	1	1	11561	tags=51%, list=20%, signal=41%	OR52I2/OR5AN1/OR2T6/OR2L2/OR10S1/OR1C1/OR52I1/OR11H6/OR2Z1/OR1K1/OR4K2/OR12D2/OR1S2/OR1N1/OR52Z1/OR4K13/OR5J2/OR14I1/OR1I1/OR2M4/OR51G2/OR2W1/OR1P1/OR10H2/OR11H2/OR2V2/OR5AC2/OR7G2/OR5AP2/OR5B21/OR4D1/OR2AE1/OR10R2/OR2T29/OR4M2/OR2G6/OR4P4/OR14A16/OR12D1/OR2L13/OR2H1/OR51V1/OR4E2/OR13C3/OR11H12/OR10H4/OR6C70/OR5B2/OR14L1P/OR51H1/OR1L3/OR6A2/OR5W2/OR13F1/OR10G6/OR5C1/OR51I1/TAS2R46/OR6F1/OR6C4/OR8…
GOBP_SENSORY_PERCEPTION_OF_SMELL	GOBP_SENSORY_PERCEPTION_OF_SMELL	441	-0.631316	-1.41425	0.00990099	1	1	11561	tags=55%, list=20%, signal=44%	OR52I2/OR5AN1/OR2T6/OR2L2/OR10S1/OR1C1/OR52I1/OR11H6/OR2Z1/OR1K1/OR4K2/OR12D2/OR1S2/OR1N1/OR52Z1/OR4K13/OR5J2/OR14I1/OR1I1/OR2M4/OR51G2/OR2W1/OR1P1/OR10H2/OR11H2/OR2V2/OR5AC2/OR7G2/OR5AP2/OR5B21/OR4D1/OR2AE1/OR10R2/OR2T29/OR4M2/OR2G6/OR4P4/OR14A16/OR12D1/OR2L13/OR2H1/OR51V1/OR4E2/OR13C3/OR11H12/OR10H4/OR6C70/OR5B2/OR14L1P/OR51H1/OR1L3/OR6A2/OR5W2/OR13F1/OR10G6/OR5C1/OR51I1/OR6F1/OR6C4/OR8K5/OR52W…
GOMF_OLFACTORY_RECEPTOR_ACTIVITY	GOMF_OLFACTORY_RECEPTOR_ACTIVITY	417	-0.644711	-1.44523	0.00990099	1	1	11561	tags=58%, list=20%, signal=46%	OR52I2/OR5AN1/OR2T6/OR2L2/OR10S1/OR1C1/OR52I1/OR11H6/OR2Z1/OR1K1/OR4K2/OR12D2/OR1S2/OR1N1/OR52Z1/OR4K13/OR5J2/OR14I1/OR1I1/OR2M4/OR51G2/OR2W1/OR1P1/OR10H2/OR11H2/OR2V2/OR5AC2/OR7G2/OR5AP2/OR5B21/OR4D1/OR2AE1/OR10R2/OR2T29/OR4M2/OR2G6/OR4P4/OR14A16/OR12D1/OR2L13/OR2H1/OR51V1/OR4E2/OR13C3/OR11H12/OR10H4/OR6C70/OR5B2/OR14L1P/OR51H1/OR1L3/OR6A2/OR5W2/OR13F1/OR10G6/OR5C1/OR51I1/OR6F1/OR6C4/OR8K5/OR52W…
GOMF_RNA_BINDING_INVOLVED_IN_POSTTRANSCRIPTIONAL_GENE_SILENCING	GOMF_RNA_BINDING_INVOLVED_IN_POSTTRANSCRIPTIONAL_GENE_SILENCING	192	-0.596578	-1.3022	0.00990099	1	1	11518	tags=52%, list=20%, signal=42%	MIR212/MIR409/MIR193B/MIR519D/MIR23A/MIR302D/MIR302A/MIR98/MIRLET7C/MIR221/MIR519B/MIR27A/MIR101-1/MIR204/MIR661/MIR15B/MIR199A1/MIR34B/MIR199B/MIR27B/MIR548C/MIR572/MIR4632/MIR133B/MIR374B/MIR3909/MIR511/MIR383/MIR520A/MIR491/MIR107/MIR128-1/MIR455/MIR222/MIR103A1/MIR206/MIR298/MIR26A1/MIR96/MIR483/MIR32/MIRLET7F1/MIR130A/MIRLET7G/MIR410/MIR361/MIR518A1/MIR2355/MIR644A/MIR125B1/MIR30B/MIR218-1/M…
GOMF_ODORANT_BINDING	GOMF_ODORANT_BINDING	114	-0.670705	-1.46733	0.01	1	1	10936	tags=61%, list=19%, signal=50%	OR1K1/OR12D2/OR5J2/OR14I1/OR5AC2/OR5AP2/OR5B21/OR10R2/OR14A16/OR12D1/OR4E2/OR5B2/OR14L1P/OR5W2/OR5C1/OR8K5/OR5A1/OR8D4/OR8H2/OR8B12/OR5A2/OR10W1/OR12D3/OR6K2/OR9Q2/OR10T2/OR5M1/OR5M3/OR5K3/OR5M8/OR5H2/OR8D2/OR13G1/OR5M10/OR9I1/OR6N2/OR10V1/OR8K1/OR11L1/OR6K6/OR5I1/OR8J3/OR14C36/OR5B17/OR5L2/OR5K1/OR5K4/OR10Z1/OR10K2/OR5AC1/OR8I2/OR8G2P/OR9G4/OR5D14/OR5D16/OR10J4/OR14J1/OR8B8/OR10K1/OR5AS1/OR5H15/…
GOBP_NEGATIVE_REGULATION_OF_NECROTIC_CELL_DEATH	GOBP_NEGATIVE_REGULATION_OF_NECROTIC_CELL_DEATH	20	-0.727958	-1.44127	0.0104167	1	1	3	tags=15%, list=0%, signal=15%	MIR221/MIR101-1/MIR485
GOBP_NEGATIVE_REGULATION_OF_VASCULAR_ENDOTHELIAL_GROWTH_FACTOR_PRODUCTION	GOBP_NEGATIVE_REGULATION_OF_VASCULAR_ENDOTHELIAL_GROWTH_FACTOR_PRODUCTION	19	-0.741546	-1.45921	0.0104167	1	1	10395	tags=58%, list=18%, signal=47%	MIR15B/MIR199A1/MIR107/MIR361/MIR147A/MIR504/MIR16-1/MIR373/MIR134/MIR520G/MIR520H
HP_ABNORMALITY_OF_KREBS_CYCLE_METABOLISM	HP_ABNORMALITY_OF_KREBS_CYCLE_METABOLISM	19	-0.841265	-1.65544	0.0104167	1	1	193	tags=11%, list=0%, signal=10%	MMAA/MT-TK
HP_LACTICACIDURIA	HP_LACTICACIDURIA	18	-0.83484	-1.62848	0.0104167	1	1	193	tags=17%, list=0%, signal=17%	LDHD/GATM/MT-TK
HP_STROKE_LIKE_EPISODE	HP_STROKE_LIKE_EPISODE	24	-0.757165	-1.52723	0.0105263	1	1	193	tags=8%, list=0%, signal=8%	MT-TQ/MT-TK
GOBP_NEGATIVE_REGULATION_OF_PROGRAMMED_NECROTIC_CELL_DEATH	GOBP_NEGATIVE_REGULATION_OF_PROGRAMMED_NECROTIC_CELL_DEATH	17	-0.774896	-1.47744	0.0107527	1	1	3	tags=18%, list=0%, signal=18%	MIR221/MIR101-1/MIR485
GOBP_POSITIVE_REGULATION_OF_CELL_AGING	GOBP_POSITIVE_REGULATION_OF_CELL_AGING	17	-0.738172	-1.40742	0.0107527	1	1	785	tags=12%, list=1%, signal=12%	MIR217/MIR188
HP_MULTIPLE_GLOMERULAR_CYSTS	HP_MULTIPLE_GLOMERULAR_CYSTS	15	-0.75885	-1.42373	0.0107527	1	1	193	tags=13%, list=0%, signal=13%	MYOCD/MT-TK
GOMF_MRNA_BINDING	GOMF_MRNA_BINDING	485	-0.503954	-1.12983	0.019802	1	1	11518	tags=18%, list=20%, signal=14%	MIR572/MIR4632/MIR133B/MIR374B/HYDIN2/MIR3909/MIR511/MIR383/MIR520A/A1CF/MIR491/KHDRBS2/MIR107/MIR128-1/MIR455/MIR222/ZCCHC13/MIR103A1/MIR206/MIR298/MIR26A1/MIR96/MIR483/MIR32/MIRLET7F1/MIR130A/MIRLET7G/MIR410/MIR361/MIR518A1/MIR2355/MIR644A/MIR125B1/RBMXL3/MIR30B/MIR218-1/MIR1277/MIR31/MIR1207/MIR147A/DAZ2/MIR920/MIR30C1/MIR505/MIR582/MIR181A2/MIR543/MIR208A/MIR640/MIR519E/MIR16-1/MIR323A/MIR520…
HP_DEMYELINATING_PERIPHERAL_NEUROPATHY	HP_DEMYELINATING_PERIPHERAL_NEUROPATHY	45	-0.698262	-1.4558	0.0204082	1	1	193	tags=4%, list=0%, signal=4%	SACS/MT-TK
HP_FOCAL_T2_HYPERINTENSE_BASAL_GANGLIA_LESION	HP_FOCAL_T2_HYPERINTENSE_BASAL_GANGLIA_LESION	44	-0.67367	-1.40156	0.0204082	1	1	193	tags=5%, list=0%, signal=5%	SLC19A3/MT-TK
HP_ABNORMAL_CIRCULATING_PYRUVATE_FAMILY_AMINO_ACID_CONCENTRATION	HP_ABNORMAL_CIRCULATING_PYRUVATE_FAMILY_AMINO_ACID_CONCENTRATION	42	-0.70899	-1.47377	0.0206186	1	1	193	tags=7%, list=0%, signal=7%	CA5A/NAGS/MT-TK
HP_MITOCHONDRIAL_INHERITANCE	HP_MITOCHONDRIAL_INHERITANCE	30	-0.741632	-1.5132	0.0208333	1	1	193	tags=7%, list=0%, signal=7%	MT-TQ/MT-TK
HP_SEGMENTAL_PERIPHERAL_DEMYELINATION_REMYELINATION	HP_SEGMENTAL_PERIPHERAL_DEMYELINATION_REMYELINATION	21	-0.706242	-1.41234	0.0208333	1	1	193	tags=10%, list=0%, signal=9%	NEFL/MT-TK
HP_ABNORMAL_SPEECH_PROSODY	HP_ABNORMAL_SPEECH_PROSODY	24	-0.715586	-1.44337	0.0210526	1	1	193	tags=17%, list=0%, signal=17%	FOXP2/MAPT/SNCA/MT-TK
HP_BONE_FRACTURE	HP_BONE_FRACTURE	11	-0.787044	-1.43684	0.0212766	1	1	4830	tags=18%, list=9%, signal=17%	FGF23/SLC2A2
GOBP_VASCULAR_ENDOTHELIAL_GROWTH_FACTOR_PRODUCTION	GOBP_VASCULAR_ENDOTHELIAL_GROWTH_FACTOR_PRODUCTION	53	-0.621413	-1.32281	0.04	1	1	8815	tags=17%, list=16%, signal=14%	MIR107/MIR361/MIR147A/MIR504/MIR16-1/MIR373/MIR134/MIR520G/MIR520H
HP_INCREASED_SERUM_PYRUVATE	HP_INCREASED_SERUM_PYRUVATE	52	-0.610776	-1.30273	0.04	1	1	193	tags=4%, list=0%, signal=4%	MT-TF/MT-TK
HP_PROGRESSIVE_EXTERNAL_OPHTHALMOPLEGIA	HP_PROGRESSIVE_EXTERNAL_OPHTHALMOPLEGIA	36	-0.647816	-1.35546	0.0408163	1	1	193	tags=6%, list=0%, signal=6%	MT-TQ/MT-TK
HP_VENTRICULAR_PREEXCITATION	HP_VENTRICULAR_PREEXCITATION	32	-0.670658	-1.37571	0.0412371	1	1	193	tags=6%, list=0%, signal=6%	MT-TQ/MT-TK
CESC
ID	Description	setSize	enrichmentScore	NES	pvalue	p.adjust	qvalues	rank	leading_edge	core_enrichment
GOBP_EPIDERMIS_DEVELOPMENT	GOBP_EPIDERMIS_DEVELOPMENT	459	-0.511721	-1.42084	0.010989	1	1	7317	tags=17%, list=13%, signal=15%	RPTN/SPINK6/TGM3/KRT40/SOSTDC1/FGF10/GAL/KRTAP10-1/LCE2C/KRTAP19-8/LIPN/RBP2/EDA2R/KRTAP9-4/KRTAP3-2/KRTAP2-3/KRT83/KRTAP10-6/LCE2B/KRTAP12-1/KRTAP10-11/SHH/KRT20/EREG/KRTAP4-3/KRTAP21-2/KRT38/KRTAP9-8/MIR125B1/KRTAP12-3/KRTAP4-4/KRT71/CDSN/ALX4/KRTAP21-3/KRTAP3-1/LCE4A/DCT/KRTAP26-1/LCE2D/POU3F2/KRTAP10-9/KRTAP20-2/KRT25/KRTAP15-1/KRTAP4-8/KRTAP9-9/KRTAP5-3/KRTAP23-1/REG3G/LCE3C/KRT27/REG3A/KRTA…
GOMF_METAL_ION_TRANSMEMBRANE_TRANSPORTER_ACTIVITY	GOMF_METAL_ION_TRANSMEMBRANE_TRANSPORTER_ACTIVITY	425	-0.481589	-1.32918	0.010989	1	1	11817	tags=34%, list=21%, signal=27%	KCNK15/SLC4A7/SLC39A10/KCNJ10/TRPM5/SCN1B/SCN4A/KCNH4/ASIC4/ATP1A3/PKD1L2/SLC39A14/SLC6A4/KCNN2/KCNE1/ABCC8/SLC13A4/SLC39A8/TTYH1/SLC9C2/TRPC3/SLC23A1/SLC11A1/SLC24A4/CACNG2/KCNJ8/KCNQ4/SLC10A4/KCNG1/GRIN3A/SLC12A3/KCNA3/CACNA2D2/FXYD4/KCNK3/KCNMB4/KCNN3/SNAP25/CACNB2/KCNJ1/CACNG1/CACNA1H/SCN10A/KCNK4/GRIK2/SLC6A20/KCNQ3/SLC34A2/GPM6A/KCNV2/SLC5A8/SLC4A10/RYR2/KCNE4/KCNH2/TRPC4/SLC6A2/CACNA1C/GRI…
GOBP_REGULATION_OF_CELLULAR_AMIDE_METABOLIC_PROCESS	GOBP_REGULATION_OF_CELLULAR_AMIDE_METABOLIC_PROCESS	478	-0.494422	-1.37293	0.0111111	1	1	7316	tags=6%, list=13%, signal=5%	MIR181A2/MIR138-1/BARHL2/MIR98/TRIM71/MIR181D/MIR107/MIR31/MIR181C/MIR125B1/MIR455/MIR212/MIR153-1/MIR483/MIR182/MIR132/ZCCHC13/NR1H4/LRRTM3/LIN28A/MIR133B/MIR518B/MIR299/MIR134/MIR204/MIR96/MIR16-1
GOBP_SIGNAL_RELEASE	GOBP_SIGNAL_RELEASE	474	-0.478202	-1.325	0.0111111	1	1	11945	tags=21%, list=21%, signal=17%	SYT13/CPLX3/KCNMB4/CELA2A/SNAP25/CACNB2/MYRIP/IL1B/BRSK2/INHA/ADCY5/HNF4A/ZBED6/BMP6/GHRHR/IL6/RASL10B/CAMK2A/INHBA/RETN/CACNA1C/GHSR/P2RX1/EDN3/GRIK5/CNR1/HCRT/ADCY1/DPP4/UNC13A/CPLX4/BRSK1/LIN7A/PPP1R9A/KMO/LEP/PDX1/GAL/TNFSF11/SYT3/SYT6/PPFIA2/SNPH/AGT/CHGA/TRH/SYT9/FFAR1/SLC2A2/EPHA5/KCNA2/HNF1B/UCN3/NEUROD1/KCNG2/GALR1/HTR1B/CPLX2/FGB/KCNB1/SOX11/FOXA2/OR51E2/TAC1/CHRNA4/SLC18A3/AGTR2/HTR2A/…
GOBP_SKIN_DEVELOPMENT	GOBP_SKIN_DEVELOPMENT	412	-0.522365	-1.43608	0.0111111	1	1	8550	tags=18%, list=15%, signal=15%	RPTN/SPINK6/TGM3/KRT40/SOSTDC1/FGF10/GAL/KRTAP10-1/LCE2C/KRTAP19-8/LIPN/SLITRK5/KRTAP9-4/KRTAP3-2/KRTAP2-3/KRT83/KRTAP10-6/LCE2B/KRTAP12-1/KRTAP10-11/SHH/KRT20/EREG/KRTAP4-3/KRTAP21-2/KRT38/KRTAP9-8/MIR125B1/KRTAP12-3/KRTAP4-4/KRT71/CDSN/ALX4/KRTAP21-3/KRTAP3-1/LCE4A/KRTAP26-1/LCE2D/KRTAP10-9/KRTAP20-2/KRT25/KRTAP15-1/KRTAP4-8/KRTAP9-9/KRTAP5-3/KRTAP23-1/REG3G/LCE3C/KRT27/REG3A/KRTAP19-5/KRTAP21-…
GOBP_SYNAPSE_ORGANIZATION	GOBP_SYNAPSE_ORGANIZATION	412	-0.485323	-1.33425	0.0111111	1	1	15677	tags=29%, list=28%, signal=21%	LRP4/CHRNB2/INA/DLG4/AMIGO2/KLK8/NRXN2/PCDH8/ZNF365/FYN/TNF/CDK5R1/GABRB3/PCDHB16/ROBO2/ELFN1/POTEKP/RAB39B/IL10/ARHGEF15/LRFN5/KIRREL3/LRFN1/CACNG2/SLC7A11/ZNF804A/ADD2/NTNG1/BDNF/KALRN/SLITRK2/PCDHGC3/CTTNBP2/LRRTM2/DNM3/ARC/ADGRB1/PCDHB5/CACNB2/SNCB/PCDH17/NTNG2/PDZRN3/SHANK2/PCDHB13/GPM6A/LRRC4C/ACHE/BSN/FGF13/CLSTN2/FLRT3/NTRK1/GHSR/ACTBL2/P2RX2/DSCAM/GAP43/ADGRL3/GABRB2/UNC13A/PCDHB4/DGKB/Z…
GOMF_PASSIVE_TRANSMEMBRANE_TRANSPORTER_ACTIVITY	GOMF_PASSIVE_TRANSMEMBRANE_TRANSPORTER_ACTIVITY	477	-0.480178	-1.33368	0.0111111	1	1	12135	tags=29%, list=21%, signal=23%	GRIN3A/CLDN17/KCNA3/GABRR2/CACNA2D2/CLIC5/P2RX5/FXYD4/GLRA3/KCNK3/KCNMB4/KCNN3/SNAP25/CACNB2/KCNJ1/CACNG1/CLCNKA/CACNA1H/SCN10A/KCNK4/GRIK2/KCNQ3/GPM6A/KCNV2/SLC5A8/CALHM5/RYR2/KCNE4/KCNH2/CHRNA6/TRPC4/CACNA1C/GRIA3/GRIK1/P2RX1/LRRC52/CACNA1B/GJA5/GRIK5/CNR1/P2RX2/KCNA4/HTR3E/HTR3C/CALHM1/GJD4/PKD1L1/GABRB2/ANO4/CHRNA9/KCNJ9/SLC17A3/SCN5A/CATSPER4/KCNJ13/GLRA1/KCNJ4/GABRG3/HTR3B/SCN2B/SCN7A/GRID2…
GOBP_HORMONE_TRANSPORT	GOBP_HORMONE_TRANSPORT	312	-0.51813	-1.39157	0.011236	1	1	14068	tags=27%, list=25%, signal=21%	OSM/APLN/CRHR1/NNAT/VIP/ADORA1/IL11/FFAR3/HNF1A/KALRN/RBP4/CACNA2D2/REN/VGF/CPLX3/CELA2A/SNAP25/MYRIP/IL1B/BRSK2/INHA/ADCY5/HNF4A/ZBED6/BMP6/GHRHR/IL6/SLC22A9/RASL10B/INHBA/RETN/CACNA1C/GHSR/EDN3/CNR1/SERPINA7/SLCO1C1/DPP4/LEP/PDX1/GAL/TNFSF11/AGT/CHGA/TRH/SYT9/FFAR1/SLC2A2/EPHA5/HNF1B/UCN3/NEUROD1/KCNG2/GALR1/FGB/KCNB1/ABCC2/SOX11/FOXA2/TAC1/AGTR2/ADCY8/HTR2C/TTR/CACNA1E/NR0B2/G6PC2/GIP/GLP1R/PT…
GOCC_SYNAPTIC_MEMBRANE	GOCC_SYNAPTIC_MEMBRANE	367	-0.535077	-1.45211	0.0113636	1	1	11360	tags=28%, list=20%, signal=23%	LRRTM4/GRIK2/PCDH17/NTNG2/SHANK2/GPM6A/LRRC4C/IL31RA/PLPPR4/CHRNA6/GABBR2/CLSTN2/FLRT3/DGKI/SLC6A2/CACNA1C/GRIA3/GHSR/DCC/GRIK1/SORCS2/P2RX1/GRIK5/CNR1/DDN/ADCY1/TENM2/GABRB2/UNC13A/CHRNA9/GLRA1/KCNJ4/GABRG3/DGKB/ZC4H2/LIN7A/HTR3B/EFNB3/GRID2/GABRB1/IGSF9B/MUSK/SYNDIG1/SLC1A6/SHC4/ERBB4/CDH2/SYT6/ATP2B2/NETO1/SNPH/CHRNA1/GRIA4/CNTN6/CDH8/SHANK1/PTPRD/KCNA2/HTR1B/KCNB1/ITGB3/GRIA2/CNTNAP4/CNTN5/KC…
GOBP_EPIDERMAL_CELL_DIFFERENTIATION	GOBP_EPIDERMAL_CELL_DIFFERENTIATION	357	-0.551201	-1.48971	0.0114943	1	1	7317	tags=18%, list=13%, signal=16%	KRTAP10-1/LCE2C/KRTAP19-8/LIPN/KRTAP9-4/KRTAP3-2/KRTAP2-3/KRT83/KRTAP10-6/LCE2B/KRTAP12-1/KRTAP10-11/KRT20/EREG/KRTAP4-3/KRTAP21-2/KRT38/KRTAP9-8/MIR125B1/KRTAP12-3/KRTAP4-4/KRT71/CDSN/KRTAP21-3/KRTAP3-1/LCE4A/KRTAP26-1/LCE2D/KRTAP10-9/KRTAP20-2/KRT25/KRTAP15-1/KRTAP4-8/KRTAP9-9/KRTAP5-3/KRTAP23-1/REG3G/LCE3C/KRT27/REG3A/KRTAP19-5/KRTAP21-1/ATOH1/KRTAP1-1/KRTAP24-1/KRTAP11-1/KRTAP10-7/KRTAP1-3/KR…
GOBP_FOREBRAIN_DEVELOPMENT	GOBP_FOREBRAIN_DEVELOPMENT	354	-0.494695	-1.3401	0.0114943	1	1	9012	tags=15%, list=16%, signal=13%	SCN5A/MAS1/SALL1/ATP1A2/DCLK1/EFNA2/ERBB4/FGF10/NR0B1/CDH2/FOXB1/PROX1/FGF8/TNR/SSTR1/SLITRK5/DLX1/LHX3/ASCL1/EPHA5/NEUROD1/SOX1/SHH/KIF1A/LHX1/DLX2/NKX2-1/NEUROG3/CDK5R2/DCT/TMEM108/ARX/POU3F2/OTX2/SLC6A3/SLC8A3/LRP2/PLXNA4/PCDH9/CRH/HSD3B2/RFX4/ATOH1/SOX3/NEUROD6/SLC32A1/GSX1/POU3F3/NPY/LHX8/CCKAR/KCNC2/FEZF2/HTR5A
GOMF_GATED_CHANNEL_ACTIVITY	GOMF_GATED_CHANNEL_ACTIVITY	337	-0.509398	-1.37155	0.0114943	1	1	11960	tags=32%, list=21%, signal=26%	GLRA3/KCNK3/KCNMB4/KCNN3/SNAP25/CACNB2/KCNJ1/CACNG1/CLCNKA/CACNA1H/SCN10A/KCNK4/GRIK2/KCNQ3/KCNV2/RYR2/KCNE4/KCNH2/CHRNA6/CACNA1C/GRIA3/GRIK1/P2RX1/LRRC52/CACNA1B/GRIK5/CNR1/P2RX2/KCNA4/HTR3E/HTR3C/CALHM1/GABRB2/ANO4/CHRNA9/KCNJ9/SLC17A3/SCN5A/CATSPER4/KCNJ13/GLRA1/KCNJ4/GABRG3/HTR3B/SCN2B/SCN7A/GRID2/GABRB1/KCNK9/KCNJ12/ABCC9/KCNU1/LRRC38/KCNH7/KCNJ18/KCNE5/KCNK17/ASIC2/HCN4/CNGB1/KCNQ2/HCN2/CHR…
GOBP_KERATINOCYTE_DIFFERENTIATION	GOBP_KERATINOCYTE_DIFFERENTIATION	299	-0.577095	-1.52401	0.0116279	1	1	7317	tags=21%, list=13%, signal=18%	KRTAP10-1/LCE2C/KRTAP19-8/LIPN/KRTAP9-4/KRTAP3-2/KRTAP2-3/KRT83/KRTAP10-6/LCE2B/KRTAP12-1/KRTAP10-11/KRT20/EREG/KRTAP4-3/KRTAP21-2/KRT38/KRTAP9-8/MIR125B1/KRTAP12-3/KRTAP4-4/KRT71/CDSN/KRTAP21-3/KRTAP3-1/LCE4A/KRTAP26-1/LCE2D/KRTAP10-9/KRTAP20-2/KRT25/KRTAP15-1/KRTAP4-8/KRTAP9-9/KRTAP5-3/KRTAP23-1/REG3G/LCE3C/KRT27/REG3A/KRTAP19-5/KRTAP21-1/KRTAP1-1/KRTAP24-1/KRTAP11-1/KRTAP10-7/KRTAP1-3/KRTAP20-…
GOBP_CELL_CELL_ADHESION_VIA_PLASMA_MEMBRANE_ADHESION_MOLECULES	GOBP_CELL_CELL_ADHESION_VIA_PLASMA_MEMBRANE_ADHESION_MOLECULES	273	-0.523686	-1.38198	0.0117647	1	1	14239	tags=40%, list=25%, signal=30%	DSC1/IL10/TENM3/FAT3/PCDH12/APOA1/LRFN5/KIRREL3/PCDHA12/CDH11/NTNG1/SLITRK2/PCDHGC3/GATA5/CDH6/CLDN17/CDH4/ROBO4/FAT4/RET/PCDHB15/PCDHGB7/DSG4/MAG/PCDHB5/PTPRM/CLDN18/PCDH17/TGFB2/NTNG2/DAB1/PCDHA8/PCDHB13/PCDHB8/PCDH18/LRRC4C/CDHR2/CLSTN2/FLRT3/CDH17/CNTN4/PCDHGB5/DSCAM/PCDHGA6/TENM2/ADGRL3/PCDHGA11/VSTM2L/PCDHGB2/HMCN1/PCDHB4/PCDHGA9/GRID2/PCDHA10/CDHR5/PCDH11Y/PCDH19/PCDHB1/CADM1/PCDHA7/PCDHGA…
GOBP_KERATINIZATION	GOBP_KERATINIZATION	222	-0.594967	-1.54628	0.0117647	1	1	7317	tags=27%, list=13%, signal=23%	KRTAP10-1/LCE2C/KRTAP19-8/LIPN/KRTAP9-4/KRTAP3-2/KRTAP2-3/KRT83/KRTAP10-6/LCE2B/KRTAP12-1/KRTAP10-11/KRT20/KRTAP4-3/KRTAP21-2/KRT38/KRTAP9-8/KRTAP12-3/KRTAP4-4/KRT71/CDSN/KRTAP21-3/KRTAP3-1/LCE4A/KRTAP26-1/LCE2D/KRTAP10-9/KRTAP20-2/KRT25/KRTAP15-1/KRTAP4-8/KRTAP9-9/KRTAP5-3/KRTAP23-1/LCE3C/KRT27/KRTAP19-5/KRTAP21-1/KRTAP1-1/KRTAP24-1/KRTAP11-1/KRTAP10-7/KRTAP1-3/KRTAP20-1/KRTAP3-3/KRTAP9-3/KRTAP1…
GOBP_NEGATIVE_REGULATION_OF_CELLULAR_AMIDE_METABOLIC_PROCESS	GOBP_NEGATIVE_REGULATION_OF_CELLULAR_AMIDE_METABOLIC_PROCESS	218	-0.578885	-1.51434	0.0117647	1	1	7316	tags=12%, list=13%, signal=11%	MIR9-1/MIR503/MIRLET7I/MIR135B/MIR181A2/MIR138-1/MIR98/TRIM71/MIR181D/MIR107/MIR31/MIR181C/MIR125B1/MIR455/MIR212/MIR153-1/MIR483/MIR182/MIR132/LIN28A/MIR133B/MIR518B/MIR299/MIR134/MIR204/MIR96/MIR16-1
GOBP_NEGATIVE_REGULATION_OF_LOCOMOTION	GOBP_NEGATIVE_REGULATION_OF_LOCOMOTION	350	-0.520958	-1.40205	0.0117647	1	1	10488	tags=24%, list=19%, signal=19%	RECK/FGF2/CXCL12/ANGPT4/SEMA6B/PTPRR/MIR199A1/SEMA3A/CHRD/ADARB1/PRKG1/SEMA3G/MYOCD/ATP1B2/PPARGC1A/SULF1/KLRC4-KLRK1/DACH1/ADORA1/PTPRO/SEMA3B/DLC1/MIR200B/DLL4/NOG/GDF2/WNT11/STC1/ADGRB1/PTPRG/PTPRM/SEMA5B/ANGPT2/SEMA4G/MIR640/SEMA3D/TBXA2R/MIR2355/GHSR/NRG3/MIR15B/MIR200C/DPP4/APOH/MIR30C2/MIRLET7G/MIR126/C5AR2/MIR9-1/SEMA3E/MIR503/MIR491/MIR140/ERBB4/CCL25/ADAMTS9/MIR138-1/MEOX2/PPARG/BMP10/H…
GOBP_REGULATION_OF_EPITHELIAL_CELL_MIGRATION	GOBP_REGULATION_OF_EPITHELIAL_CELL_MIGRATION	273	-0.508667	-1.34235	0.0117647	1	1	15210	tags=25%, list=27%, signal=19%	TNF/MIR222/TEK/ANGPT1/HDAC9/MIR200A/ACVRL1/PIK3CG/FGF2/ANGPT4/RHOJ/PTPRR/MIR199A1/SEMA3A/FLT4/NOS3/KDR/ADGRA2/JCAD/MIR210/MIR200B/VEGFC/DLL4/GDF2/STC1/FGF18/ADGRB1/FGF7/PTPRG/PTPRM/MIR27A/TGFB2/FGF16/ANGPT2/CCBE1/MIR640/TBXA2R/HAS2/MIR2355/MIR15B/MIR200C/MIRLET7F1/APOH/MIR126/MIR503/MIR135B/FGF10/ADAMTS9/VIL1/PROX1/MEOX2/PPARG/AGT/BMP10/MIR31/ITGB3/TAC1/AGTR2/MIR212/TDGF1/MIR483/MIR132/FGF4/MIR49…
GOCC_POSTSYNAPTIC_MEMBRANE	GOCC_POSTSYNAPTIC_MEMBRANE	264	-0.555924	-1.45817	0.0117647	1	1	11360	tags=30%, list=20%, signal=24%	LRRTM4/GRIK2/PCDH17/SHANK2/LRRC4C/PLPPR4/CHRNA6/GABBR2/CLSTN2/FLRT3/CACNA1C/GRIA3/DCC/GRIK1/SORCS2/P2RX1/GRIK5/DDN/ADCY1/TENM2/GABRB2/CHRNA9/GLRA1/KCNJ4/GABRG3/DGKB/ZC4H2/LIN7A/HTR3B/EFNB3/GRID2/GABRB1/IGSF9B/MUSK/SYNDIG1/SHC4/ERBB4/CDH2/ATP2B2/NETO1/CHRNA1/GRIA4/SHANK1/KCNB1/ITGB3/GRIA2/KCND2/CHRNA4/GRIK3/GABRG1/HTR2A/NLGN4Y/CHRNA2/CACNG5/IL1RAPL1/ADRA1A/GABRA5/CHRM5/GRM3/CHRND/GSG1L/SLC6A3/SLC8…
HP_ENCEPHALOPATHY	HP_ENCEPHALOPATHY	269	-0.496481	-1.30686	0.0117647	1	1	9217	tags=9%, list=16%, signal=8%	CACNA1B/GABRB2/SLC19A3/GABRB1/DCX/SLC6A1/MT-TW/KCNQ2/UNC80/KCNA2/KCNB1/KCNT2/CUX2/CACNA1E/GABRA5/ARX/SCN3A/SCN1A/PCK1/GABRA1/GABRA2/GABRG2/HCN1/GRIN2B/MT-TQ
GOBP_REGULATION_OF_ENDOTHELIAL_CELL_MIGRATION	GOBP_REGULATION_OF_ENDOTHELIAL_CELL_MIGRATION	211	-0.527486	-1.37536	0.0119048	1	1	14771	tags=27%, list=26%, signal=20%	HDAC9/MIR200A/ACVRL1/PIK3CG/FGF2/ANGPT4/RHOJ/MIR199A1/FLT4/NOS3/KDR/ADGRA2/JCAD/MIR210/MIR200B/VEGFC/DLL4/GDF2/STC1/FGF18/ADGRB1/PTPRM/MIR27A/FGF16/ANGPT2/CCBE1/MIR640/TBXA2R/MIR2355/MIR15B/MIR200C/MIRLET7F1/APOH/MIR126/MIR503/MIR135B/ADAMTS9/PROX1/MEOX2/PPARG/AGT/BMP10/MIR31/ITGB3/AGTR2/MIR212/TDGF1/MIR483/MIR132/FGF4/MIR494/MIR133B/MIR129-1/MIR204/MIR188/MIR16-1
GOBP_REGULATION_OF_HORMONE_SECRETION	GOBP_REGULATION_OF_HORMONE_SECRETION	260	-0.533075	-1.39238	0.0119048	1	1	11765	tags=24%, list=21%, signal=19%	CELA2A/SNAP25/MYRIP/IL1B/BRSK2/INHA/ADCY5/HNF4A/ZBED6/BMP6/GHRHR/IL6/RASL10B/INHBA/RETN/CACNA1C/GHSR/EDN3/CNR1/DPP4/LEP/PDX1/GAL/TNFSF11/AGT/CHGA/TRH/SYT9/FFAR1/SLC2A2/EPHA5/UCN3/NEUROD1/KCNG2/GALR1/FGB/KCNB1/SOX11/FOXA2/TAC1/AGTR2/ADCY8/HTR2C/CACNA1E/NR0B2/G6PC2/GIP/GLP1R/FGA/MTNR1B/RFX6/FGG/CRH/SLC30A8/CARTPT/NR1H4/INS/CCKAR/NPVF/FGF23/KCNC2/GCG
GOBP_RESPONSE_TO_MONOSACCHARIDE	GOBP_RESPONSE_TO_MONOSACCHARIDE	194	-0.57738	-1.4989	0.0119048	1	1	11450	tags=19%, list=20%, signal=15%	BRSK2/ADCY5/HNF4A/MLXIPL/ZBED6/ANGPT2/GHRHR/APOA2/GRIK5/NKX2-2/MIRLET7G/LEP/PDX1/PAX2/TRH/EPHA5/UCN3/NEUROD1/KCNB1/FOXA2/PKLR/ADCY8/GATA4/GCKR/NR0B2/GIP/FGF21/PTPRN/RFX6/PCK1/CRH/SLC30A8/NR1H4/LIN28A/GCG/MIR16-1
GOBP_INSULIN_SECRETION	GOBP_INSULIN_SECRETION	207	-0.531821	-1.38558	0.0120482	1	1	12521	tags=23%, list=22%, signal=18%	RBP4/CACNA2D2/VGF/CPLX3/CELA2A/SNAP25/MYRIP/IL1B/BRSK2/ADCY5/HNF4A/ZBED6/IL6/CACNA1C/GHSR/CNR1/DPP4/LEP/PDX1/GAL/CHGA/TRH/SYT9/FFAR1/SLC2A2/EPHA5/HNF1B/UCN3/NEUROD1/KCNG2/KCNB1/FOXA2/ADCY8/CACNA1E/NR0B2/G6PC2/GIP/GLP1R/PTPRN/MTNR1B/RFX6/CRH/SLC30A8/CARTPT/NR1H4/GPR119/KCNC2/GCG
GOBP_PEPTIDE_HORMONE_SECRETION	GOBP_PEPTIDE_HORMONE_SECRETION	247	-0.509206	-1.32703	0.0120482	1	1	13980	tags=26%, list=25%, signal=20%	APLN/CRHR1/NNAT/VIP/FFAR3/HNF1A/KALRN/RBP4/CACNA2D2/VGF/CPLX3/CELA2A/SNAP25/MYRIP/IL1B/BRSK2/ADCY5/HNF4A/ZBED6/GHRHR/IL6/RASL10B/CACNA1C/GHSR/EDN3/CNR1/DPP4/LEP/PDX1/GAL/TNFSF11/CHGA/TRH/SYT9/FFAR1/SLC2A2/EPHA5/HNF1B/UCN3/NEUROD1/KCNG2/FGB/KCNB1/FOXA2/ADCY8/HTR2C/CACNA1E/NR0B2/G6PC2/GIP/GLP1R/PTPRN/FGA/MTNR1B/RFX6/FGG/CRH/SLC30A8/CARTPT/NR1H4/INS/GPR119/KCNC2/GCG
GOBP_REGULATION_OF_PEPTIDE_HORMONE_SECRETION	GOBP_REGULATION_OF_PEPTIDE_HORMONE_SECRETION	209	-0.529848	-1.37978	0.0120482	1	1	11765	tags=23%, list=21%, signal=18%	CELA2A/SNAP25/MYRIP/IL1B/BRSK2/ADCY5/HNF4A/ZBED6/GHRHR/IL6/RASL10B/CACNA1C/GHSR/CNR1/DPP4/LEP/PDX1/TNFSF11/CHGA/TRH/SYT9/FFAR1/SLC2A2/EPHA5/UCN3/NEUROD1/KCNG2/FGB/KCNB1/FOXA2/ADCY8/HTR2C/CACNA1E/NR0B2/G6PC2/GIP/GLP1R/FGA/MTNR1B/RFX6/FGG/CRH/SLC30A8/CARTPT/NR1H4/INS/KCNC2/GCG
GOCC_INTERMEDIATE_FILAMENT	GOCC_INTERMEDIATE_FILAMENT	203	-0.623863	-1.6208	0.0120482	1	1	6506	tags=27%, list=12%, signal=24%	KRTAP9-4/KRTAP3-2/KRTAP2-3/KRT83/KRTAP10-6/KRTAP12-1/KRTAP10-11/KRT20/KRTAP4-3/KRTAP21-2/KRT38/KRTAP9-8/KRTAP12-3/KRTAP4-4/KRT71/KRTAP21-3/KRTAP3-1/KRTAP26-1/LMNTD1/KRTAP10-9/KRTAP20-2/KRT25/KRTAP15-1/KRTAP7-1/KRTAP4-8/KRTAP9-9/KRTAP5-3/KRTAP23-1/KRT27/KRTAP19-5/KRTAP21-1/KRTAP1-1/KRTAP24-1/KRTAP20-4/KRTAP11-1/KRTAP10-7/KRTAP4-12/KRTAP1-3/KRTAP20-1/KRTAP3-3/KRTAP9-3/KRTAP1-4/KRTAP4-11/KRTAP6-1/KR…
GOBP_ENDOTHELIAL_CELL_MIGRATION	GOBP_ENDOTHELIAL_CELL_MIGRATION	257	-0.516251	-1.34749	0.0121951	1	1	15210	tags=26%, list=27%, signal=19%	TNF/CDH5/TEK/ANGPT1/GREM1/HDAC9/MIR200A/ACVRL1/PIK3CG/FGF2/ANGPT4/RHOJ/MIR199A1/APOA1/FLT4/NOS3/KDR/ADGRA2/JCAD/LOXL2/MIR210/MIR200B/VEGFC/DLL4/GDF2/STC1/FGF18/ADGRB1/PTPRM/MIR27A/FGF16/FAP/ANGPT2/CCBE1/MIR640/TBXA2R/MIR2355/MIR15B/MIR200C/DPP4/MIRLET7F1/APOH/MIR126/MIR503/MIR135B/ADAMTS9/PROX1/MEOX2/PPARG/AGT/LGALS12/SCG2/BMP10/MIR31/ITGB3/AGTR2/MIR212/TDGF1/MIR483/MIR132/FGF4/MIR494/MIR133B/MIR…
GOBP_REGULATION_OF_CELLULAR_KETONE_METABOLIC_PROCESS	GOBP_REGULATION_OF_CELLULAR_KETONE_METABOLIC_PROCESS	184	-0.569276	-1.47819	0.0121951	1	1	7258	tags=10%, list=13%, signal=9%	AVP/PROX1/PPARG/ATCAY/ACMSD/PSMB11/MIR548P/APOA4/BMP5/GIP/FGF19/MALRD1/MIR182/MIR132/NR1H4/INS/FABP1/MIR204/MIR96
GOBP_REGULATION_OF_LIPID_BIOSYNTHETIC_PROCESS	GOBP_REGULATION_OF_LIPID_BIOSYNTHETIC_PROCESS	201	-0.544609	-1.4125	0.0121951	1	1	8530	tags=11%, list=15%, signal=10%	MIR9-1/LEP/AVP/SERPINA12/NR0B1/PROX1/NR5A1/MIR548P/HTR2A/HTR2C/APOA4/BMP5/GIP/FGF19/MALRD1/MIR182/PCK1/CGA/MIR132/NR1H4/INS/MIR204/MIR96
GOCC_INTERMEDIATE_FILAMENT_CYTOSKELETON	GOCC_INTERMEDIATE_FILAMENT_CYTOSKELETON	244	-0.608503	-1.57588	0.0121951	1	1	6506	tags=23%, list=12%, signal=20%	KRTAP9-4/KRTAP3-2/KRTAP2-3/KRT83/KRTAP10-6/KRTAP12-1/KRTAP10-11/KRT20/KRTAP4-3/KRTAP21-2/KRT38/KRTAP9-8/KRTAP12-3/KRTAP4-4/KRT71/KRTAP21-3/KRTAP3-1/KRTAP26-1/LMNTD1/KRTAP10-9/KRTAP20-2/KRT25/KRTAP15-1/KRTAP7-1/KRTAP4-8/KRTAP9-9/KRTAP5-3/KRTAP23-1/KRT27/KRTAP19-5/KRTAP21-1/NR1I2/KRTAP1-1/KRTAP24-1/KRTAP20-4/KRTAP11-1/KRTAP10-7/KRTAP4-12/KRTAP1-3/KRTAP20-1/KRTAP3-3/KRTAP9-3/KRTAP1-4/KRTAP4-11/KRTAP…
HP_MYOCLONIC_SEIZURE	HP_MYOCLONIC_SEIZURE	177	-0.562931	-1.45965	0.0123457	1	1	8050	tags=11%, list=14%, signal=9%	PDX1/PCDH19/SLC6A1/MT-TW/KCNT2/CUX2/KIF1A/CDH15/GABRA5/ARX/SCN1A/MYT1L/TRPM3/INS/GABRA1/GABRG2/HCN1/GRIN2B/MT-TQ
GOBP_HOMOPHILIC_CELL_ADHESION_VIA_PLASMA_MEMBRANE_ADHESION_MOLECULES	GOBP_HOMOPHILIC_CELL_ADHESION_VIA_PLASMA_MEMBRANE_ADHESION_MOLECULES	167	-0.59823	-1.53631	0.0126582	1	1	14786	tags=51%, list=26%, signal=38%	PCDHB18P/PCDHB16/ROBO2/DSC1/TENM3/FAT3/PCDH12/KIRREL3/PCDHA12/CDH11/PCDHGC3/CDH6/CDH4/ROBO4/FAT4/RET/PCDHB15/PCDHGB7/DSG4/PCDHB5/PTPRM/PCDH17/PCDHA8/PCDHB13/PCDHB8/PCDH18/CDHR2/CLSTN2/CDH17/CNTN4/PCDHGB5/DSCAM/PCDHGA6/PCDHGA11/VSTM2L/PCDHGB2/HMCN1/PCDHB4/PCDHGA9/PCDHA10/CDHR5/PCDH11Y/PCDH19/PCDHB1/CADM1/PCDHA7/PCDHGA1/PCDHGA2/PCDHB3/PCDHB11/CDH2/PCDH20/PCDHGB3/PCDHGA5/PCDHA6/PCDHA9/PCDHGB6/L1CAM/…
GOBP_SYNAPSE_ASSEMBLY	GOBP_SYNAPSE_ASSEMBLY	173	-0.557449	-1.43897	0.0126582	1	1	13835	tags=36%, list=24%, signal=28%	LRFN5/KIRREL3/LRFN1/ADD2/BDNF/SLITRK2/LRRTM2/DNM3/ADGRB1/PCDHB5/PCDH17/NTNG2/SHANK2/PCDHB13/GPM6A/ACHE/BSN/FGF13/CLSTN2/FLRT3/NTRK1/GHSR/DSCAM/GAP43/ADGRL3/GABRB2/PCDHB4/NRCAM/PPP1R9A/GRID2/MUSK/LRRC24/SYNDIG1/PCDHB3/PCDHB11/ERBB4/CDH2/ASIC2/GPC6/SLITRK4/SLITRK5/PCDHB6/SHANK1/PTPRD/DNER/CUX2/CNTN5/NLGN4Y/GJA10/IL1RAPL1/PCDHB2/ADGRB3/LRTM2/IGFN1/EPHA7/LRRTM1/CBLN4/SLITRK1/LRRTM3/GABRA1/GABRA2/GABR…
GOCC_IMMUNOGLOBULIN_COMPLEX	GOCC_IMMUNOGLOBULIN_COMPLEX	153	-0.587145	-1.47845	0.0138889	1	1	19806	tags=78%, list=35%, signal=51%	IGKV1-9/IGKV3-7/IGKV1-13/IGHV2-26/IGLV1-51/IGKV3-20/IGHM/IGLV5-37/IGHG4/IGLV3-19/IGLV2-14/IGLV2-11/IGLV2-33/IGLV3-10/IGKV1-37/TRDC/IGHV3-33/IGLV1-44/IGHV4-59/IGKV1D-43/IGKV4-1/IGLC7/IGLV2-23/IGLL5/IGLV3-1/IGKV1D-13/IGLV1-47/IGLV6-57/IGLV3-9/IGHV4-4/IGKV3D-15/IGLV2-8/IGLV9-49/IGKV1-8/IGHV1-18/IGLV4-69/IGKV1-27/CD79A/IGHV3-23/IGLV11-55/IGHV4-39/IGLV4-60/IGLV3-27/IGKV1D-8/IGLV3-25/IGLV7-46/IGKV1-6/I…
GOBP_NEGATIVE_REGULATION_OF_CELL_MIGRATION_INVOLVED_IN_SPROUTING_ANGIOGENESIS	GOBP_NEGATIVE_REGULATION_OF_CELL_MIGRATION_INVOLVED_IN_SPROUTING_ANGIOGENESIS	34	-0.773039	-1.50935	0.0142857	1	1	715	tags=12%, list=1%, signal=12%	MIR483/MIR494/MIR188/MIR16-1
GOBP_CELLULAR_RESPONSE_TO_CARBOHYDRATE_STIMULUS	GOBP_CELLULAR_RESPONSE_TO_CARBOHYDRATE_STIMULUS	136	-0.608983	-1.48288	0.0147059	1	1	11450	tags=18%, list=20%, signal=15%	BRSK2/ADCY5/MLXIPL/ZBED6/GHRHR/GRIK5/MIRLET7G/LEP/PDX1/PAX2/EPHA5/NEUROD1/KCNB1/FOXA2/ADCY8/GATA4/FGF21/PTPRN/RFX6/PCK1/CRH/NR1H4/LIN28A/GCG/MIR16-1
GOBP_ENDOTHELIAL_CELL_CHEMOTAXIS	GOBP_ENDOTHELIAL_CELL_CHEMOTAXIS	31	-0.799821	-1.53939	0.0147059	1	1	858	tags=13%, list=2%, signal=13%	FGF18/FGF16/FGF4/MIR16-1
GOBP_NEGATIVE_REGULATION_OF_BLOOD_VESSEL_ENDOTHELIAL_CELL_MIGRATION	GOBP_NEGATIVE_REGULATION_OF_BLOOD_VESSEL_ENDOTHELIAL_CELL_MIGRATION	65	-0.737848	-1.67171	0.0147059	1	1	4866	tags=15%, list=9%, signal=14%	AGTR2/MIR212/MIR483/MIR132/MIR494/MIR133B/MIR129-1/MIR204/MIR188/MIR16-1
GOBP_NEGATIVE_REGULATION_OF_VASCULAR_ASSOCIATED_SMOOTH_MUSCLE_CELL_PROLIFERATION	GOBP_NEGATIVE_REGULATION_OF_VASCULAR_ASSOCIATED_SMOOTH_MUSCLE_CELL_PROLIFERATION	30	-0.808779	-1.552	0.0147059	1	1	180	tags=13%, list=0%, signal=13%	MIR182/MIR1298/MIR362/MIR96
GOBP_PLACENTA_BLOOD_VESSEL_DEVELOPMENT	GOBP_PLACENTA_BLOOD_VESSEL_DEVELOPMENT	30	-0.86221	-1.65454	0.0147059	1	1	21	tags=10%, list=0%, signal=10%	WNT2/VASH1/MIR16-1
GOBP_RESPONSE_TO_FIBROBLAST_GROWTH_FACTOR	GOBP_RESPONSE_TO_FIBROBLAST_GROWTH_FACTOR	145	-0.586258	-1.44178	0.0147059	1	1	7078	tags=21%, list=13%, signal=19%	DLL4/NOG/FAT4/FGF18/POSTN/FGF7/FGF16/FGF6/FLRT3/SPRY4/FLRT1/MIR503/FGF10/FGF8/TRIM71/FGF5/CPS1/HHIP/LHX1/PRDM14/TDGF1/FGF9/OTX2/FGF21/FGF19/PTH/FGF20/FGF23/FGF3/FGF4/MIR16-1
GOCC_U1_SNRNP	GOCC_U1_SNRNP	31	-0.812564	-1.56391	0.0147059	1	1	642	tags=26%, list=1%, signal=26%	RNVU1-15/RNVU1-3/RNVU1-1/RNVU1-19/RNVU1-4/RNVU1-6/RNVU1-17/RNU1-4
HP_PROGRESSIVE_HEARING_IMPAIRMENT	HP_PROGRESSIVE_HEARING_IMPAIRMENT	52	-0.745554	-1.61471	0.0147059	1	1	1994	tags=8%, list=4%, signal=7%	SP7/FGF3/MT-TQ/MIR96
GOBP_MRNA_CIS_SPLICING_VIA_SPLICEOSOME	GOBP_MRNA_CIS_SPLICING_VIA_SPLICEOSOME	37	-0.770121	-1.53422	0.0149254	1	1	642	tags=22%, list=1%, signal=21%	RNVU1-15/RNVU1-3/RNVU1-1/RNVU1-19/RNVU1-4/RNVU1-6/RNVU1-17/RNU1-4
GOBP_POSITIVE_REGULATION_OF_INTRINSIC_APOPTOTIC_SIGNALING_PATHWAY	GOBP_POSITIVE_REGULATION_OF_INTRINSIC_APOPTOTIC_SIGNALING_PATHWAY	59	-0.753918	-1.67372	0.0149254	1	1	21	tags=3%, list=0%, signal=3%	SEPTIN4/MIR16-1
GOBP_POSITIVE_REGULATION_OF_MUSCLE_CELL_DIFFERENTIATION	GOBP_POSITIVE_REGULATION_OF_MUSCLE_CELL_DIFFERENTIATION	81	-0.695546	-1.62212	0.0149254	1	1	8072	tags=19%, list=14%, signal=16%	LMOD3/MIR140/CDH2/PROX1/MYF5/BMP10/SHH/MIR125B1/CDH15/SMYD1/MYF6/CTNNA2/MYOD1/MIR133B/MIR204
GOMF_RNA_POLYMERASE_CORE_ENZYME_BINDING	GOMF_RNA_POLYMERASE_CORE_ENZYME_BINDING	56	-0.724122	-1.58764	0.0149254	1	1	348	tags=12%, list=1%, signal=12%	MIR375/MIR126/MIRLET7I/MIR140/MIR139/MIR297/MIR16-1
GOBP_ANTIMICROBIAL_HUMORAL_RESPONSE	GOBP_ANTIMICROBIAL_HUMORAL_RESPONSE	142	-0.584447	-1.42137	0.0151515	1	1	10419	tags=25%, list=18%, signal=20%	CXCL5/WFDC12/DMBT1/PRSS2/DEFA3/KLK5/BPIFA2/DEFB127/WFDC13/PPBP/PF4/F2/CHGA/BPIFB2/PLA2G2A/ACOD1/FGB/REG1A/WFDC9/HTN3/HTN1/PGC/FGA/REG3G/REG3A/KLK3/DEFB103B/GALP/SPAG11B/MUC7/SPAG11A/REG1B/DEFA6/DEFA5/CST9LP1
GOBP_CELLULAR_GLUCOSE_HOMEOSTASIS	GOBP_CELLULAR_GLUCOSE_HOMEOSTASIS	143	-0.597267	-1.45427	0.0151515	1	1	11633	tags=18%, list=21%, signal=14%	HKDC1/BRSK2/ADCY5/MLXIPL/ZBED6/GHRHR/GRIK5/MIRLET7G/PDX1/PAX2/EPHA5/NEUROD1/KCNB1/FOXA2/ADCY8/GATA4/FGF21/PTPRN/RFX6/PCK1/CRH/CARTPT/NR1H4/LIN28A/GCG/MIR16-1
GOBP_NEGATIVE_REGULATION_OF_EPITHELIAL_CELL_MIGRATION	GOBP_NEGATIVE_REGULATION_OF_EPITHELIAL_CELL_MIGRATION	100	-0.676566	-1.58807	0.0151515	1	1	4030	tags=14%, list=7%, signal=13%	ADAMTS9/MEOX2/PPARG/BMP10/AGTR2/MIR212/MIR483/MIR132/MIR494/MIR133B/MIR129-1/MIR204/MIR188/MIR16-1
GOBP_NEGATIVE_REGULATION_OF_PROTEIN_SUMOYLATION	GOBP_NEGATIVE_REGULATION_OF_PROTEIN_SUMOYLATION	11	-0.914257	-1.50448	0.0151515	1	1	2747	tags=27%, list=5%, signal=26%	CTNNB1/MAGEA2/MAGEA2B
GOBP_NEGATIVE_REGULATION_OF_SMOOTH_MUSCLE_CELL_PROLIFERATION	GOBP_NEGATIVE_REGULATION_OF_SMOOTH_MUSCLE_CELL_PROLIFERATION	54	-0.725221	-1.57892	0.0151515	1	1	180	tags=7%, list=0%, signal=7%	MIR182/MIR1298/MIR362/MIR96
GOCC_INTRINSIC_COMPONENT_OF_SYNAPTIC_MEMBRANE	GOCC_INTRINSIC_COMPONENT_OF_SYNAPTIC_MEMBRANE	140	-0.598664	-1.45262	0.0151515	1	1	11300	tags=37%, list=20%, signal=30%	PCDH17/NTNG2/GPM6A/LRRC4C/PLPPR4/CLSTN2/FLRT3/GHSR/DCC/P2RX1/GRIK5/CNR1/ADCY1/GABRB2/CHRNA9/GLRA1/GABRG3/EFNB3/GRID2/SLC1A6/ERBB4/CDH2/SYT6/NETO1/CHRNA1/CNTN6/PTPRD/HTR1B/CNTN5/KCND2/HTR2A/ADCY8/CACNG5/ADRA1A/GABRA5/GRM3/KCNJ3/CHRND/GSG1L/SLC6A3/SLC8A3/GABRA4/EPHA7/LRRTM1/SLITRK1/GRIA1/SLC6A5/LRRTM3/SORCS3/CDH10/CDH9/HTR5A
GOCC_KERATIN_FILAMENT	GOCC_KERATIN_FILAMENT	94	-0.685303	-1.59506	0.0151515	1	1	6506	tags=33%, list=12%, signal=29%	KRTAP9-4/KRTAP3-2/KRTAP2-3/KRT83/KRTAP10-6/KRTAP12-1/KRTAP10-11/KRTAP4-3/KRTAP9-8/KRTAP12-3/KRTAP4-4/KRT71/KRTAP3-1/KRTAP10-9/KRTAP4-8/KRTAP9-9/KRTAP5-3/KRTAP1-1/KRTAP24-1/KRTAP10-7/KRTAP4-12/KRTAP1-3/KRTAP3-3/KRTAP9-3/KRTAP1-4/KRTAP4-11/KRTAP2-4/KRTAP10-8/KRTAP4-9/KRTAP2-1/KRTAP9-7
GOMF_BASAL_TRANSCRIPTION_MACHINERY_BINDING	GOMF_BASAL_TRANSCRIPTION_MACHINERY_BINDING	68	-0.703984	-1.57636	0.0151515	1	1	348	tags=10%, list=1%, signal=10%	MIR375/MIR126/MIRLET7I/MIR140/MIR139/MIR297/MIR16-1
GOBP_SPLICEOSOMAL_COMPLEX_ASSEMBLY	GOBP_SPLICEOSOMAL_COMPLEX_ASSEMBLY	77	-0.646391	-1.47826	0.0153846	1	1	4350	tags=5%, list=8%, signal=5%	CELF5/CELF3/RNVU1-17/RNU1-4
GOBP_TROPHOBLAST_CELL_MIGRATION	GOBP_TROPHOBLAST_CELL_MIGRATION	16	-0.869421	-1.55781	0.0153846	1	1	21	tags=12%, list=0%, signal=12%	MIR15B/MIR16-1
HP_DISTAL_PERIPHERAL_SENSORY_NEUROPATHY	HP_DISTAL_PERIPHERAL_SENSORY_NEUROPATHY	19	-0.799644	-1.45939	0.0153846	1	1	561	tags=11%, list=1%, signal=10%	MT-TW/MT-TQ
GOBP_REGULATION_OF_ARP2_3_COMPLEX_MEDIATED_ACTIN_NUCLEATION	GOBP_REGULATION_OF_ARP2_3_COMPLEX_MEDIATED_ACTIN_NUCLEATION	20	-0.823575	-1.50555	0.015625	1	1	1334	tags=10%, list=2%, signal=10%	WASF3/CTNNA2
GOBP_REGULATION_OF_ENDOTHELIAL_CELL_CHEMOTAXIS	GOBP_REGULATION_OF_ENDOTHELIAL_CELL_CHEMOTAXIS	23	-0.816956	-1.50651	0.015625	1	1	858	tags=17%, list=2%, signal=17%	FGF18/FGF16/FGF4/MIR16-1
GOMF_PRE_MRNA_5_SPLICE_SITE_BINDING	GOMF_PRE_MRNA_5_SPLICE_SITE_BINDING	17	-0.819382	-1.47864	0.015625	1	1	642	tags=47%, list=1%, signal=47%	RNVU1-15/RNVU1-3/RNVU1-1/RNVU1-19/RNVU1-4/RNVU1-6/RNVU1-17/RNU1-4
GOMF_RNA_POLYMERASE_BINDING	GOMF_RNA_POLYMERASE_BINDING	72	-0.700656	-1.56794	0.015625	1	1	348	tags=10%, list=1%, signal=10%	MIR375/MIR126/MIRLET7I/MIR140/MIR139/MIR297/MIR16-1
HP_PROGRESSIVE_SENSORINEURAL_HEARING_IMPAIRMENT	HP_PROGRESSIVE_SENSORINEURAL_HEARING_IMPAIRMENT	44	-0.750549	-1.55153	0.015625	1	1	1228	tags=9%, list=2%, signal=9%	MT-TW/FGF3/MT-TQ/MIR96
GOBP_MYOBLAST_PROLIFERATION	GOBP_MYOBLAST_PROLIFERATION	22	-0.895557	-1.65847	0.015873	1	1	1287	tags=23%, list=2%, signal=22%	MSTN/MYOD1/MIR133B/MIR134/MIR204
GOBP_POSITIVE_REGULATION_OF_HISTONE_H3_K4_METHYLATION	GOBP_POSITIVE_REGULATION_OF_HISTONE_H3_K4_METHYLATION	18	-0.797748	-1.45278	0.015873	1	1	3865	tags=11%, list=7%, signal=10%	PRDM9/GCG
GOBP_REGULATION_OF_MYOBLAST_PROLIFERATION	GOBP_REGULATION_OF_MYOBLAST_PROLIFERATION	18	-0.903987	-1.64625	0.015873	1	1	1287	tags=28%, list=2%, signal=27%	MSTN/MYOD1/MIR133B/MIR134/MIR204
HP_STUTTERING	HP_STUTTERING	18	-0.804275	-1.46466	0.015873	1	1	561	tags=11%, list=1%, signal=11%	MT-TW/MT-TQ
GOBP_AMEBOIDAL_TYPE_CELL_MIGRATION	GOBP_AMEBOIDAL_TYPE_CELL_MIGRATION	450	-0.472126	-1.30761	0.0217391	1	1	15210	tags=23%, list=27%, signal=17%	TNF/CDH5/MIR222/TEK/ZEB2/ANGPT1/NANOS1/TBX1/GREM1/HDAC9/MIR200A/ACVRL1/PIK3CG/FGF2/ANGPT4/SEMA6B/RHOJ/PTPRR/MIR199A1/SEMA3A/SEMA3G/APOA1/FLT4/NOS3/KDR/EDNRB/DDR2/ADGRA2/JCAD/LOXL2/SEMA3B/FN1/MIR210/MIR200B/VEGFC/DLL4/GDF2/WNT11/STC1/RET/FGF18/FOLR1/AKAP12/ADGRB1/FGF7/PTPRG/PTPRM/SEMA5B/MIR27A/TGFB2/FGF16/FAP/ANGPT2/SEMA4G/CCBE1/MIR640/SEMA3D/TBXA2R/HAS2/SOX17/MIR2355/MIR15B/MIR200C/EDN3/DPP4/MIRL…
GOBP_REGULATION_OF_MEMBRANE_POTENTIAL	GOBP_REGULATION_OF_MEMBRANE_POTENTIAL	430	-0.478645	-1.32424	0.0217391	1	1	15692	tags=32%, list=28%, signal=23%	GRID1/CACNA1A/KCNA5/CHRNB2/GRM1/DLG4/PID1/KCNK15/KCNJ10/SCN1B/RGS4/SCN4A/GABRB3/KCNH4/ATP1A3/POPDC3/KCNN2/KCNE1/ANK2/SLC39A8/CCN6/PLN/NTSR2/ATP1B2/KDR/ADORA1/CACNG2/KCNJ8/CASQ2/RIMS3/CAV3/ACTN2/GRIN3A/CD36/MIR328/GABRR2/P2RX5/GLRA3/KCNK3/KCNMB4/TAFA4/CACNB2/CACNA1H/SCN10A/KCNK4/GRIK2/KCNQ3/SHANK2/RYR2/FGF13/KCNE4/KCNH2/CHRNA6/SLC4A3/CACNA1C/GRIA3/GRIK1/P2RX1/CACNA1B/GJA5/GRIK5/CNR1/P2RX2/HCRT/HTR…
GOCC_PRESYNAPSE	GOCC_PRESYNAPSE	487	-0.460847	-1.28568	0.0217391	1	1	11860	tags=20%, list=21%, signal=16%	CPLX3/SNAP25/CACNB2/SLC1A7/SNCB/MME/GRIK2/PCDH17/NTNG2/GPM6A/DNAJC6/SLC4A10/BSN/EGFLAM/IL31RA/FLRT3/DGKI/SLC6A2/P2RX1/GRIK5/TMEM163/CNR1/SVOP/HCRT/SLC6A17/UNC13A/SYPL2/CPLX4/GLRA1/FZD3/SLC18A1/BRSK1/LIN7A/EFNB3/KCNK9/PNOC/SYNDIG1/SLC29A4/APBA2/SLC1A6/ERBB4/CDH2/SLC6A1/NTSR1/SYT6/ATP2B2/CNGB1/MT3/PPFIA2/SNPH/RAB3C/SYT9/CNTN6/CDH8/DDC/ATCAY/CBARP/PTPRD/KCNA2/UCN3/HTR1B/CPLX2/KIF1A/CNTNAP4/SV2C/CNTN…
GOMF_ANION_TRANSMEMBRANE_TRANSPORTER_ACTIVITY	GOMF_ANION_TRANSMEMBRANE_TRANSPORTER_ACTIVITY	458	-0.463422	-1.28757	0.021978	1	1	15642	tags=28%, list=28%, signal=20%	SLCO4A1/SLC7A5P1/SLC7A6/SLC45A2/TTYH2/SLC4A7/GABRB3/SLC25A31/SLCO6A1/SLC26A8/SLC39A14/SLC6A4/SLCO5A1/SLC38A11/AQP11/SLC13A4/SLC39A8/SLC22A7/TTYH1/SLC9C2/SLC19A1/SLCO1A2/ABCB1/SLC23A1/SLC45A1/SLC45A3/SLC25A52/SLC24A4/ANO7/SLC43A1/SLC7A11/SLC10A4/HPX/SLC25A47/SLC12A3/CLDN17/CD36/GABRR2/RBP4/CLIC5/SLC17A9/SLC51B/SLC7A2/GLRA3/SLC1A7/SLC7A4/CLCNKA/SLC3A1/SLC6A20/SLC5A8/SLC4A10/SLC38A3/SLC22A9/SLC4A3/S…
HP_SHORT_ATTENTION_SPAN	HP_SHORT_ATTENTION_SPAN	397	-0.47857	-1.3173	0.021978	1	1	8496	tags=10%, list=15%, signal=9%	SEMA3E/ATP10A/PWAR1/PAH/PCDH19/CDH2/MT-TW/HMGA2/FGF8/GRIA4/KCNA2/DRD5/SHH/PIEZO2/KCNB1/TUBB3/SNORD116-1/FRMPD4/MKRN3/NKX2-1/AGTR2/IL1RAPL1/GATA4/GABRA5/FMN2/ARX/TDGF1/SCN3A/SCN1A/NAT8L/PWRN1/MYT1L/SLITRK1/LHCGR/NPAP1/GABRA1/GABRA2/GABRG2/HCN1/MT-TQ
GOMF_CATION_CHANNEL_ACTIVITY	GOMF_CATION_CHANNEL_ACTIVITY	333	-0.498196	-1.34626	0.0227273	1	1	12135	tags=31%, list=21%, signal=24%	P2RX5/FXYD4/KCNK3/KCNMB4/KCNN3/SNAP25/CACNB2/KCNJ1/CACNG1/CACNA1H/SCN10A/KCNK4/GRIK2/KCNQ3/GPM6A/KCNV2/CALHM5/RYR2/KCNE4/KCNH2/CHRNA6/TRPC4/CACNA1C/GRIA3/GRIK1/P2RX1/LRRC52/CACNA1B/GRIK5/CNR1/P2RX2/KCNA4/HTR3E/HTR3C/CALHM1/PKD1L1/CHRNA9/KCNJ9/SCN5A/CATSPER4/KCNJ13/KCNJ4/HTR3B/SCN2B/SCN7A/KCNK9/KCNJ12/ABCC9/LRRC38/KCNH7/KCNJ18/KCNE5/KCNK17/ASIC2/HCN4/CNGB1/KCNQ2/UNC80/HCN2/CHRNA1/GRIA4/NALCN/ASIC5…
GOCC_TRANSPORTER_COMPLEX	GOCC_TRANSPORTER_COMPLEX	338	-0.490292	-1.32058	0.0229885	1	1	12784	tags=30%, list=23%, signal=23%	GRIN3A/CLDN17/KCNA3/GABRR2/CACNA2D2/CLIC5/FXYD4/GLRA3/KCNMB4/SNAP25/CACNB2/KCNJ1/CACNG1/CLCNKA/CACNA1H/SCN10A/KCNK4/GRIK2/KCNQ3/SHANK2/KCNV2/RYR2/KCNE4/KCNH2/CHRNA6/TRPC4/CACNA1C/GRIA3/LRRC52/CACNA1B/GRIK5/KCNA4/PKD1L1/GABRB2/CHRNA9/DPP6/SCN5A/CATSPER4/GLRA1/KCNJ4/GABRG3/NOS1/ATP1A2/HTR3B/SCN2B/SCN7A/GRID2/ATP10A/ABCG8/GABRB1/ABCC9/LRRC38/KCNE5/HCN4/CNGB1/KCNQ2/UNC80/HCN2/CHRNA1/GRIA4/SHANK1/SCN3…
GOBP_TISSUE_MIGRATION	GOBP_TISSUE_MIGRATION	344	-0.494789	-1.33333	0.0232558	1	1	15210	tags=24%, list=27%, signal=18%	TNF/CDH5/MIR222/TEK/ZEB2/ANGPT1/NANOS1/ACTG2/GREM1/HDAC9/MIR200A/ACVRL1/PIK3CG/FGF2/ANGPT4/RHOJ/PTPRR/MIR199A1/SEMA3A/APOA1/FLT4/NOS3/KDR/ADGRA2/JCAD/LOXL2/MIR210/MIR200B/VEGFC/DLL4/GDF2/STC1/FGF18/ADGRB1/FGF7/PTPRG/PTPRM/MIR27A/TGFB2/FGF16/FAP/ANGPT2/CCBE1/MIR640/TBXA2R/HAS2/MIR2355/MIR15B/MIR200C/DPP4/MIRLET7F1/APOH/MIR126/MIR503/MIR135B/FGF10/ADAMTS9/VIL1/PROX1/MEOX2/FGF8/PPARG/AGT/LGALS12/SCG…
GOBP_ADENYLATE_CYCLASE_MODULATING_G_PROTEIN_COUPLED_RECEPTOR_SIGNALING_PATHWAY	GOBP_ADENYLATE_CYCLASE_MODULATING_G_PROTEIN_COUPLED_RECEPTOR_SIGNALING_PATHWAY	229	-0.530331	-1.37887	0.0235294	1	1	12403	tags=28%, list=22%, signal=22%	GPR4/SSTR2/PTGDR2/ADGRE2/LGR5/PTGFR/AKAP12/ADGRB1/ADCY5/GHRHR/HRH4/TBXA2R/HTR1D/CNR1/MC5R/ADCY1/ADGRL3/ADRA1B/ADGRG3/GRM6/GPR6/PF4/SCTR/HTR4/FPR2/PTGER3/CHGA/CCR3/RXFP1/GPR78/DRD5/UCN3/MRAP/GALR1/HTR1B/NPY1R/MTNR1A/GLP2R/ADGRG7/GRIK3/TSHR/ADCY8/IAPP/OPRK1/ADRA1A/CHRM5/GRM3/ADCYAP1R1/MCHR1/ADGRB3/GLP1R/MC4R/PTH/LHCGR/GNAT3/CALCB/CHRM2/GPR101/GNAT2/GPR119/GPR12/CALCA/NPY2R/GCG/HTR5A
GOBP_PROTEIN_KINASE_B_SIGNALING	GOBP_PROTEIN_KINASE_B_SIGNALING	262	-0.508002	-1.33104	0.0235294	1	1	15224	tags=32%, list=27%, signal=24%	CASS4/TGFA/CALCR/PDGFRA/IGF2/FGFR1/THBS1/PIK3R5/FERMT2/CHI3L1/IRS1/CCL3/CSF3/NRG1/NRG2/IL26/PTPRJ/PDGFRB/PDGFB/FYN/TNF/MIR222/TEK/KL/ANGPT1/PIK3CG/FGF2/TSPYL5/FGF22/MIR199A1/OSM/F10/KDR/FGFR4/TPTE2/CAV3/NTRK3/RET/FGF18/FGF7/XDH/PEAR1/TMEM100/IL1B/FGF16/FGF6/CRYBA1/NTRK1/RASD2/MIR200C/MIRLET7F1/PKHD1/MIR375/MIR126/LEP/ERBB4/FGF10/TNFSF11/EPGN/PAX2/SFRP5/MT3/MIR138-1/FGF8/THPO/FGF5/GFRAL/MSTN/EREG/…
GOBP_RESPONSE_TO_CARBOHYDRATE	GOBP_RESPONSE_TO_CARBOHYDRATE	219	-0.550029	-1.43425	0.0235294	1	1	11450	tags=17%, list=20%, signal=14%	BRSK2/ADCY5/HNF4A/MLXIPL/ZBED6/ANGPT2/GHRHR/APOA2/GRIK5/P2RX2/NKX2-2/MIRLET7G/LEP/PDX1/PAX2/TRH/EPHA5/HNF1B/UCN3/NEUROD1/KCNB1/FOXA2/PKLR/ADCY8/GATA4/GCKR/NR0B2/GIP/FGF21/PTPRN/RFX6/PCK1/CRH/SLC30A8/NR1H4/LIN28A/GCG/MIR16-1
GOBP_CARBOHYDRATE_HOMEOSTASIS	GOBP_CARBOHYDRATE_HOMEOSTASIS	227	-0.533197	-1.38992	0.0238095	1	1	13490	tags=22%, list=24%, signal=17%	PDK4/FGFR4/HNF1A/MIR33A/CYP7A1/CAV3/CSRP3/RBP4/CMA1/VGF/HKDC1/BRSK2/ADCY5/HNF4A/MLXIPL/ZBED6/ADGRF5/GHRHR/CYP11B1/IL6/GRIK5/CNR1/DBH/MIRLET7G/LEP/PDX1/PAX2/PPARG/BHLHA15/FFAR1/EPHA5/NEUROD1/KCNB1/FOXA2/ADCY8/GATA4/GCKR/G6PC2/FGF21/PTPRN/MTNR1B/RFX6/PCK1/CRH/CARTPT/NR1H4/INS/LIN28A/GCG/MIR16-1
GOMF_GLYCOSAMINOGLYCAN_BINDING	GOMF_GLYCOSAMINOGLYCAN_BINDING	228	-0.523828	-1.36244	0.0238095	1	1	16653	tags=39%, list=29%, signal=27%	PTCH1/NDNF/FGFRL1/BMP4/NELL2/THBS2/CCL23/NRP1/CRISPLD2/CCN4/COL5A1/LPL/AZU1/CCN5/NCAN/APOB/ADAMTS3/KNG1/NLRP3/SOST/IMPG2/FGF2/CCN6/COL13A1/ADAMTS1/FBN1/THBS4/SULF1/SUSD5/FGFR4/PGLYRP1/CCL8/PCSK6/FN1/CCL7/RSPO3/POSTN/ADGRE2/FGF7/SMOC1/VTN/CEMIP/SERPINA10/ADAMTS15/CCL15/EGFLAM/VCAN/LRTM1/TNFAIP6/AOC1/SLIT3/SERPIND1/EPYC/LIPG/APOH/RSPO4/HAPLN4/HAPLN1/SERPINA5/LYVE1/ADAMTS5/GREM2/FGF10/PF4/DEFB106B/F…
HP_RETINAL_DEGENERATION	HP_RETINAL_DEGENERATION	226	-0.515119	-1.34041	0.0238095	1	1	10856	tags=14%, list=19%, signal=11%	PROM1/KCNV2/RLBP1/CFHR1/VCAN/DOCK3/CACNA1B/GRK1/ZNF423/GABRB2/HMCN1/PDE6H/PAX2/CNGB1/LAMA1/KCNA2/FBN2/KCNB1/GUCA1A/SLC7A14/GABRA5/SCN3A/MAB21L1/MYT1L/GNAT2/RAX2/GABRA2/GABRG2/MFRP/HCN1/MIR204
GOBP_CARDIAC_MUSCLE_TISSUE_DEVELOPMENT	GOBP_CARDIAC_MUSCLE_TISSUE_DEVELOPMENT	204	-0.510794	-1.32873	0.0240964	1	1	16685	tags=31%, list=30%, signal=22%	FHOD3/S1PR1/BMP4/NRG1/NKX2-5/WNT2/CHD7/PDGFRB/MIR17HG/SORBS2/RGS4/MIR222/ANKRD1/SGCD/GREM1/MYH6/FGF2/MIR199A1/PLN/MYOCD/FOXH1/CAV3/GATA5/CSRP3/ACTN2/MIR200B/DLL4/NOG/RBP4/MIR590/TGFB2/TBX2/MIR199B/MYL2/JPH2/RYR2/ALPK2/MYL3/WT1/ERBB4/MYO18B/ADAMTS9/PROX1/FGF8/BMP10/TBX20/COL11A1/MIR548C/SGCZ/NEB/AGTR2/ADRA1A/GATA4/BMP5/ACTC1/LRP2/LRRC10/HAND1/NRAP/TBX5/FGF20/FGF3/MIR204
GOBP_POSITIVE_REGULATION_OF_ERK1_AND_ERK2_CASCADE	GOBP_POSITIVE_REGULATION_OF_ERK1_AND_ERK2_CASCADE	205	-0.501774	-1.3026	0.0240964	1	1	17849	tags=37%, list=32%, signal=25%	CALCR/S100A7/PDGFRA/HAND2/GPBAR1/CCR1/FERMT2/F2R/NODAL/CHI3L1/CCL3/PDGFC/CCL16/BMP4/CASR/CCL23/NRP1/MIR27B/IL26/PDGFRB/CCL13/MARCO/PDGFB/TNF/MIR222/TEK/ANGPT1/SSTR4/FGF2/CCL11/FLT4/ALKAL2/KDR/FGFR4/CCL8/CCL3L3/CCL18/CCL7/ARHGAP8/CD36/FGF18/AKAP12/TLR4/P2RY6/MIR27A/CCL15/CCL1/NTRK1/MIR126/C5AR2/ERBB4/FGF10/CCL25/TNFSF11/FPR2/MT3/FGF8/THPO/NPY5R/SLC30A10/PLA2G2A/FGB/ALKAL1/HTR2A/HTR2C/ADRA1A/GATA4/…
GOBP_STEROID_BIOSYNTHETIC_PROCESS	GOBP_STEROID_BIOSYNTHETIC_PROCESS	190	-0.526345	-1.36663	0.0240964	1	1	13310	tags=21%, list=24%, signal=16%	FGFR4/MIR33A/OSBPL6/CYP7A1/CYP51A1/AKR1D1/CYP11A1/CACNA1H/HSD11B1/BMP6/ACOX2/SNAI1/IDI2/CYP11B1/CYP3A7/SRD5A2/NPC1L1/AKR1C4/LEP/CYP11B2/NR0B1/PROX1/NR5A1/HMGCS2/HSD17B2/CYP8B1/MIR548P/BAAT/RDH8/APOA4/CYP17A1/BMP5/FGF19/MALRD1/MIR182/HSD3B2/CGA/NR1H4/SCP2D1/MIR96
GOMF_VOLTAGE_GATED_ION_CHANNEL_ACTIVITY	GOMF_VOLTAGE_GATED_ION_CHANNEL_ACTIVITY	197	-0.518641	-1.34973	0.0240964	1	1	13537	tags=37%, list=24%, signal=28%	CACNG2/KCNJ8/KCNQ4/KCNG1/CALHM3/GRIN3A/KCNA3/CACNA2D2/CLIC5/KCNK3/SNAP25/CACNB2/KCNJ1/CACNG1/CLCNKA/CACNA1H/SCN10A/KCNK4/KCNQ3/KCNV2/KCNE4/KCNH2/CACNA1C/LRRC52/CACNA1B/CNR1/KCNA4/CALHM1/KCNJ9/SLC17A3/SCN5A/CATSPER4/KCNJ13/KCNJ4/SCN2B/SCN7A/KCNK9/KCNJ12/ABCC9/KCNU1/LRRC38/KCNH7/KCNJ18/KCNE5/KCNK17/HCN4/KCNQ2/HCN2/NALCN/SCN3B/KCNA2/KCNA10/KCNG2/HTR1B/KCNB1/KCNT2/KCNF1/KCND2/KCNK12/KCNH8/CACNG5/CACN…
GOBP_NEUROTRANSMITTER_TRANSPORT	GOBP_NEUROTRANSMITTER_TRANSPORT	208	-0.505227	-1.31203	0.0243902	1	1	10184	tags=25%, list=18%, signal=21%	CPLX3/KCNMB4/SNAP25/CACNB2/SLC1A7/CAMK2A/SLC6A2/P2RX1/GRIK5/CNR1/HCRT/ADCY1/SLC6A15/SLC6A17/UNC13A/CPLX4/SLC18A1/BRSK1/NOS1/LIN7A/ATP1A2/PPP1R9A/KMO/SLC29A4/SLC1A6/SLC6A12/SLC6A1/SYT6/PPFIA2/SNPH/SLC6A7/SYT9/DDC/HTR1B/CPLX2/ITGB3/SLC6A13/SV2C/SLC18A3/HTR2A/RIMS4/SLC22A2/ADRA1A/SLC6A18/UNC13C/SLC17A8/SLC6A3/SLC5A7/SLC6A5/SLC32A1/GABRA2/SLC17A6
HP_CEREBRAL_VISUAL_IMPAIRMENT	HP_CEREBRAL_VISUAL_IMPAIRMENT	208	-0.517447	-1.34377	0.0243902	1	1	14002	tags=14%, list=25%, signal=11%	ADARB1/KIRREL3/SLC45A1/CACNG2/FOXH1/MT-TL1/EEF1A2/BRSK2/GRIK2/MT-TV/CAMK2A/CACNA1B/KIF5A/GABRB2/GABRB1/MT-TW/FGF8/SHH/KIF1A/CDH15/CACNA1E/FMN2/TDGF1/SCN3A/SCN1A/MYT1L/TRPM3/GABRA2/GRIN2B/MT-TQ
HP_GENERALIZED_ONSET_MOTOR_SEIZURE	HP_GENERALIZED_ONSET_MOTOR_SEIZURE	191	-0.511728	-1.32587	0.0243902	1	1	8050	tags=10%, list=14%, signal=9%	PDX1/PCDH19/SLC6A1/MT-TW/KCNQ2/KCNT2/CUX2/KIF1A/CDH15/GABRA5/ARX/SCN1A/MYT1L/TRPM3/INS/GABRA1/GABRG2/HCN1/GRIN2B/MT-TQ
GOBP_POSITIVE_REGULATION_OF_CELLULAR_AMIDE_METABOLIC_PROCESS	GOBP_POSITIVE_REGULATION_OF_CELLULAR_AMIDE_METABOLIC_PROCESS	163	-0.525634	-1.34937	0.0253165	1	1	2334	tags=2%, list=4%, signal=2%	ZCCHC13/LRRTM3/LIN28A/MIR16-1
GOBP_POSITIVE_REGULATION_OF_PROTEIN_KINASE_B_SIGNALING	GOBP_POSITIVE_REGULATION_OF_PROTEIN_KINASE_B_SIGNALING	171	-0.539973	-1.38931	0.0253165	1	1	17907	tags=37%, list=32%, signal=25%	CASS4/TGFA/CALCR/PDGFRA/IGF2/FGFR1/THBS1/PIK3R5/FERMT2/CHI3L1/IRS1/CCL3/CSF3/NRG1/NRG2/IL26/PTPRJ/PDGFRB/PDGFB/FYN/TNF/MIR222/TEK/KL/ANGPT1/PIK3CG/FGF2/TSPYL5/FGF22/MIR199A1/OSM/F10/FGFR4/RET/FGF18/FGF7/FGF16/FGF6/RASD2/MIR126/LEP/ERBB4/FGF10/TNFSF11/EPGN/MIR138-1/FGF8/THPO/FGF5/GFRAL/EREG/MYOC/IAPP/FGF9/LRP2/FGF19/MIR132/INS/FGF20/LIN28A/FGF23/FGF3/FGF4
GOMF_HEPARIN_BINDING	GOMF_HEPARIN_BINDING	164	-0.535722	-1.37689	0.0253165	1	1	16653	tags=41%, list=29%, signal=29%	PTCH1/NDNF/FGFRL1/BMP4/NELL2/THBS2/CCL23/NRP1/CRISPLD2/CCN4/COL5A1/LPL/AZU1/CCN5/APOB/ADAMTS3/KNG1/SOST/IMPG2/FGF2/CCN6/COL13A1/ADAMTS1/FBN1/THBS4/FGFR4/CCL8/PCSK6/FN1/CCL7/RSPO3/POSTN/FGF7/SMOC1/VTN/SERPINA10/ADAMTS15/CCL15/LRTM1/AOC1/SLIT3/SERPIND1/LIPG/APOH/RSPO4/SERPINA5/ADAMTS5/GREM2/FGF10/PF4/DEFB106B/F11/F2/MSTN/MPO/COL11A1/NELL1/COL25A1/ADAMTS8/FGF9/REG4/LRTM2/ELSPBP1/RSPO2/BSPH1/TENM1/FG…
HP_STATUS_EPILEPTICUS	HP_STATUS_EPILEPTICUS	171	-0.517842	-1.33237	0.0253165	1	1	10184	tags=15%, list=18%, signal=13%	CAMK2A/GRIA3/CACNA1B/GABRB2/SLC19A3/ATP1A2/PCDH19/SLC6A1/KCNQ2/GRIA4/KCNA2/KCNB1/KIF1A/CDH15/CACNA1E/GABRA5/ARX/SCN3A/SCN1A/MYT1L/TRPM3/GABRA1/GABRA2/GABRG2/HCN1/GRIN2B
GOBP_BLOOD_VESSEL_ENDOTHELIAL_CELL_MIGRATION	GOBP_BLOOD_VESSEL_ENDOTHELIAL_CELL_MIGRATION	159	-0.549783	-1.40002	0.0263158	1	1	4030	tags=6%, list=7%, signal=6%	MIR212/TDGF1/MIR483/MIR132/MIR494/MIR133B/MIR129-1/MIR204/MIR188/MIR16-1
GOBP_REGULATION_OF_METALLOPEPTIDASE_ACTIVITY	GOBP_REGULATION_OF_METALLOPEPTIDASE_ACTIVITY	17	0.838428	1.7092	0.0263158	1	1	101	tags=6%, list=0%, signal=6%	MIR892B
GOCC_TRANSCRIPTIONALLY_ACTIVE_CHROMATIN	GOCC_TRANSCRIPTIONALLY_ACTIVE_CHROMATIN	23	0.797627	1.69585	0.0263158	1	1	2219	tags=9%, list=4%, signal=8%	H2AB2/H2AB3
GOMF_ORGANIC_ACID_TRANSMEMBRANE_TRANSPORTER_ACTIVITY	GOMF_ORGANIC_ACID_TRANSMEMBRANE_TRANSPORTER_ACTIVITY	158	-0.542808	-1.38259	0.0263158	1	1	14107	tags=32%, list=25%, signal=24%	SLC19A1/SLCO1A2/ABCB1/SLC23A1/SLC43A1/SLC7A11/SLC10A4/CD36/SLC51B/SLC7A2/SLC1A7/SLC7A4/SLC3A1/SLC6A20/SLC5A8/SLC38A3/SLC22A9/SLC38A8/SLC22A13/SLC6A15/SLCO1C1/SLC16A4/SLCO1B1/SLC26A10/AKR1C4/SLC29A4/SLC1A6/AQP9/MPC1L/SLC6A12/SLC6A1/SLC7A10/SLC6A7/SLC66A1L/SLC38A4/SLCO1B7/SLC16A12/ABCC2/SLC6A13/SLC26A7/SLC7A14/SLC22A2/SLC6A18/SLC17A8/SLC6A5/SLC32A1/SLC6A19/SLC26A3/SLC10A2/SLC17A6
GOMF_PEPTIDE_LYSINE_N_ACETYLTRANSFERASE_ACTIVITY	GOMF_PEPTIDE_LYSINE_N_ACETYLTRANSFERASE_ACTIVITY	45	0.720556	1.7712	0.0263158	1	1	887	tags=2%, list=2%, signal=2%	CDY2A
GOBP_PROTEIN_MATURATION_BY_IRON_SULFUR_CLUSTER_TRANSFER	GOBP_PROTEIN_MATURATION_BY_IRON_SULFUR_CLUSTER_TRANSFER	16	0.918026	1.8244	0.027027	1	1	199	tags=6%, list=0%, signal=6%	BOLA2
GOBP_AMINO_ACID_TRANSPORT	GOBP_AMINO_ACID_TRANSPORT	152	-0.532604	-1.34017	0.0277778	1	1	16360	tags=36%, list=29%, signal=25%	SLC6A11/RAB3A/HRH3/SLC1A1/SYT1/SLC7A5P1/GRM1/SLC7A6/KCNJ10/RGS4/AVPR1A/SLC38A11/SLC11A1/ADORA1/SLC43A1/SLC7A11/SLC25A47/SLC7A2/SNAP25/SLC1A7/SLC7A4/SLC3A1/SLC6A20/SLC38A3/TRPC4/SLC38A8/TSPO2/SLC6A15/SLC6A17/ATP1A2/KMO/LEP/AVP/SLC1A6/SLC6A12/SLC6A1/NTSR1/PPFIA2/SLC7A10/SLC6A7/SLC66A1L/TRH/SLC38A4/NPY5R/HTR1B/SLC6A13/SLC7A14/SLC22A2/SLC6A18/SLC17A8/SLC6A5/SLC32A1/SLC6A19/SLC17A6
GOBP_IRON_SULFUR_CLUSTER_ASSEMBLY	GOBP_IRON_SULFUR_CLUSTER_ASSEMBLY	24	0.880773	1.85084	0.0277778	1	1	199	tags=4%, list=0%, signal=4%	BOLA2
GOBP_PALLIUM_DEVELOPMENT	GOBP_PALLIUM_DEVELOPMENT	153	-0.530861	-1.33672	0.0277778	1	1	7679	tags=14%, list=14%, signal=12%	CDH2/PROX1/FGF8/DLX1/ASCL1/EPHA5/NEUROD1/DLX2/NKX2-1/CDK5R2/TMEM108/ARX/POU3F2/HSD3B2/ATOH1/NEUROD6/SLC32A1/POU3F3/NPY/FEZF2/HTR5A
GOMF_PEPTIDE_RECEPTOR_ACTIVITY	GOMF_PEPTIDE_RECEPTOR_ACTIVITY	152	-0.556754	-1.40094	0.0277778	1	1	11116	tags=38%, list=20%, signal=30%	NTSR2/RXFP2/CRHR1/EDNRB/APLNR/CCRL2/RXFP4/SSTR2/GRPR/LGR5/CCKBR/GUCY2C/GHRHR/ACKR2/CCR9/SORCS2/RXFP3/MC5R/MAS1/GUCY2F/CXCR1/GAL/SCTR/GPR32P1/NTSR1/FPR2/NPSR1/SSTR1/CCR3/SORCS1/RXFP1/NPY5R/GALR1/UTS2R/NPY1R/GPR32/GLP2R/KISS1R/TSHR/AGTR2/GPR83/OPRK1/ADCYAP1R1/MCHR1/HCRTR2/MCHR2/GLP1R/GPR139/MC4R/TACR3/PROKR2/LHCGR/NPBWR2/SORCS3/CCKAR/NPFFR2/NPY2R
GOBP_POSITIVE_REGULATION_OF_HORMONE_SECRETION	GOBP_POSITIVE_REGULATION_OF_HORMONE_SECRETION	124	-0.563196	-1.36682	0.028169	1	1	11642	tags=24%, list=21%, signal=19%	MYRIP/INHA/BMP6/GHRHR/RASL10B/INHBA/RETN/EDN3/LEP/PDX1/GAL/TNFSF11/TRH/FFAR1/UCN3/GALR1/FGB/SOX11/TAC1/ADCY8/NR0B2/GIP/FGA/RFX6/FGG/CRH/SLC30A8/NR1H4/INS/GCG
GOBP_REGULATION_OF_MUSCLE_CELL_DIFFERENTIATION	GOBP_REGULATION_OF_MUSCLE_CELL_DIFFERENTIATION	151	-0.566069	-1.41497	0.028169	1	1	8072	tags=13%, list=14%, signal=11%	LMOD3/MIR140/CDH2/TCF23/PROX1/BHLHA15/MYF5/BMP10/SHH/EREG/MIR125B1/CDH15/SMYD1/FGF9/MYF6/CTNNA2/MYOD1/MIR133B/MIR204
GOBP_NEGATIVE_REGULATION_OF_METALLOPEPTIDASE_ACTIVITY	GOBP_NEGATIVE_REGULATION_OF_METALLOPEPTIDASE_ACTIVITY	10	0.867556	1.58713	0.0285714	1	1	101	tags=10%, list=0%, signal=10%	MIR892B
GOBP_RESPONSE_TO_INTERLEUKIN_12	GOBP_RESPONSE_TO_INTERLEUKIN_12	50	0.707965	1.69178	0.0285714	1	1	1948	tags=4%, list=3%, signal=4%	BOLA2/GSTA2
HP_IMPAIRED_VISUOSPATIAL_CONSTRUCTIVE_COGNITION	HP_IMPAIRED_VISUOSPATIAL_CONSTRUCTIVE_COGNITION	35	-0.75467	-1.49398	0.0285714	1	1	1727	tags=11%, list=3%, signal=11%	MT-TW/GABRA1/GABRG2/MT-TQ
GOBP_MODULATION_OF_PROCESS_OF_OTHER_ORGANISM	GOBP_MODULATION_OF_PROCESS_OF_OTHER_ORGANISM	123	-0.56908	-1.36909	0.0289855	1	1	7322	tags=9%, list=13%, signal=8%	HMGA2/PTX3/CLEC4M/CRP/REG1A/LRRC19/REG3G/REG3A/REG1B/DEFA6/DEFA5
GOBP_DIGESTION	GOBP_DIGESTION	138	-0.545131	-1.33144	0.0294118	1	1	11453	tags=31%, list=20%, signal=25%	CCKBR/MUC2/GUCY2C/CHIA/TFF1/GHSR/PRSS2/NPC1L1/SOAT2/GKN1/ABCG8/LEP/FGF10/TFF2/HRH2/PTGER3/VIL1/SERPINA3/SLC2A2/CRACD/CYP8B1/UCN3/NEUROD1/PRSS1/MGAM/STATH/TAC1/SLC26A7/SST/OPRK1/APOA4/CHRM5/ALPI/ARX/FABP2/PGC/PGA5/GUCA2A/MUC6/CRH/SI/PNLIPRP2/FABP1
GOBP_ENDOCRINE_SYSTEM_DEVELOPMENT	GOBP_ENDOCRINE_SYSTEM_DEVELOPMENT	122	-0.577662	-1.37916	0.0294118	1	1	11175	tags=27%, list=20%, signal=22%	HNF4A/ZBED6/BMP6/GHRHR/IL6/PROP1/NKX2-2/WT1/SALL1/GCM2/PDX1/FGF10/NR0B1/CDH2/FGF8/NR5A1/LHX3/ASCL1/NEUROD1/SHH/FOXA2/NKX2-1/NEUROG3/BMP5/POU3F2/GIP/SLC6A3/RFX6/NKX6-2/SOX3/GSX1/PAX1/PAX4
GOCC_GABA_ERGIC_SYNAPSE	GOCC_GABA_ERGIC_SYNAPSE	64	-0.66292	-1.50129	0.0294118	1	1	13835	tags=45%, list=24%, signal=34%	LRFN5/GUCY1A1/PTPRO/SLITRK2/GABRR2/LRRTM2/PCDH17/BSN/CNR1/GAP43/GABRB2/SLC6A17/GABRG3/GABRB1/IGSF9B/ERBB4/ATP2B2/CNTN5/KCND2/NLGN4Y/ADRA1A/GABRA5/GABRA4/LRRTM1/CBLN4/SLITRK1/SLC32A1/GABRG2/CDH10
GOCC_INTRINSIC_COMPONENT_OF_POSTSYNAPTIC_MEMBRANE	GOCC_INTRINSIC_COMPONENT_OF_POSTSYNAPTIC_MEMBRANE	105	-0.600583	-1.41374	0.0294118	1	1	10653	tags=35%, list=19%, signal=29%	LRRC4C/PLPPR4/CLSTN2/FLRT3/DCC/P2RX1/GRIK5/ADCY1/GABRB2/CHRNA9/GLRA1/EFNB3/GRID2/ERBB4/CDH2/NETO1/CHRNA1/KCND2/HTR2A/CACNG5/ADRA1A/GABRA5/GRM3/CHRND/GSG1L/SLC6A3/SLC8A3/GABRA4/EPHA7/LRRTM1/SLITRK1/GRIA1/LRRTM3/SORCS3/CDH10/CDH9/HTR5A
GOMF_METAL_CLUSTER_BINDING	GOMF_METAL_CLUSTER_BINDING	67	0.623655	1.52515	0.0294118	1	1	199	tags=1%, list=0%, signal=1%	BOLA2
GOBP_FIBROBLAST_GROWTH_FACTOR_RECEPTOR_SIGNALING_PATHWAY	GOBP_FIBROBLAST_GROWTH_FACTOR_RECEPTOR_SIGNALING_PATHWAY	111	-0.613963	-1.44975	0.0298507	1	1	7768	tags=23%, list=14%, signal=19%	NOG/FAT4/FGF18/FGF7/FGF16/FGF6/FLRT3/SPRY4/FLRT1/MIR503/FGF10/FGF8/TRIM71/FGF5/HHIP/PRDM14/FGF9/OTX2/FGF21/FGF19/FGF20/FGF23/FGF3/FGF4/MIR16-1
GOBP_INTERLEUKIN_18_PRODUCTION	GOBP_INTERLEUKIN_18_PRODUCTION	10	-0.896622	-1.47309	0.0298507	1	1	253	tags=30%, list=0%, signal=30%	NLRP12/IL10/MIR411
GOBP_NEUROPEPTIDE_SIGNALING_PATHWAY	GOBP_NEUROPEPTIDE_SIGNALING_PATHWAY	106	-0.632511	-1.48711	0.0298507	1	1	9789	tags=39%, list=17%, signal=32%	SORCS2/RXFP3/HCRT/PCSK1N/GLRA1/PNOC/GAL/NTSR1/NPSR1/SSTR1/SORCS1/NPY5R/GALR1/UTS2R/ECEL1/NPY1R/PPY/KISS1R/PROK2/TAC1/NPPB/GPR83/OPRK1/MCHR1/HCRTR2/MCHR2/GPR139/PROKR2/NPBWR2/CARTPT/TENM1/SORCS3/GLRA2/GALP/PDYN/NPY/NPVF/NPFFR2/CALCA/NPY2R/PYY3
GOBP_POSITIVE_REGULATION_OF_CYTOPLASMIC_TRANSLATION	GOBP_POSITIVE_REGULATION_OF_CYTOPLASMIC_TRANSLATION	12	-0.886541	-1.50668	0.0298507	1	1	2334	tags=25%, list=4%, signal=24%	MTOR/ZCCHC13/LIN28A
GOCC_INTRINSIC_COMPONENT_OF_POSTSYNAPTIC_SPECIALIZATION_MEMBRANE	GOCC_INTRINSIC_COMPONENT_OF_POSTSYNAPTIC_SPECIALIZATION_MEMBRANE	69	-0.651012	-1.4737	0.0298507	1	1	10653	tags=41%, list=19%, signal=33%	LRRC4C/PLPPR4/CLSTN2/DCC/GRIK5/ADCY1/GABRB2/CHRNA9/GLRA1/EFNB3/GRID2/ERBB4/CDH2/NETO1/CHRNA1/KCND2/GABRA5/CHRND/GSG1L/GABRA4/EPHA7/LRRTM1/SLITRK1/GRIA1/LRRTM3/SORCS3/CDH10/HTR5A
GOMF_AMINO_ACID_TRANSMEMBRANE_TRANSPORTER_ACTIVITY	GOMF_AMINO_ACID_TRANSMEMBRANE_TRANSPORTER_ACTIVITY	81	-0.617096	-1.43917	0.0298507	1	1	11634	tags=32%, list=21%, signal=26%	SLC43A1/SLC7A11/SLC7A2/SLC1A7/SLC7A4/SLC3A1/SLC6A20/SLC38A3/SLC38A8/SLC6A15/SLC1A6/SLC6A12/SLC6A1/SLC7A10/SLC6A7/SLC66A1L/SLC38A4/SLC6A13/SLC7A14/SLC22A2/SLC6A18/SLC17A8/SLC6A5/SLC32A1/SLC6A19/SLC17A6
GOMF_NEUROTRANSMITTER_RECEPTOR_ACTIVITY	GOMF_NEUROTRANSMITTER_RECEPTOR_ACTIVITY	110	-0.589748	-1.39366	0.0298507	1	1	10425	tags=39%, list=18%, signal=32%	CHRNA6/HTR1D/GRIA3/GRIK1/GRIK5/HTR3E/HTR3C/GABRB2/CHRNA9/GLRA1/GABRG3/HTR3B/GRID2/GABRB1/HRH2/HTR4/OR10H4/CHRNA1/GRIA4/DRD5/HTR1B/OR5T3/GRIA2/CHRNA4/GRIK3/GABRG1/HTR2A/CHRNA2/HTR2C/GABRA5/CHRM5/OR10J5/CHRND/GABRA4/GRIA1/CHRM2/GLRA2/GABRA1/GABRA2/GABRG2/GRIN2B/HTR5A/OR10H3
GOMF_PRE_MRNA_BINDING	GOMF_PRE_MRNA_BINDING	56	-0.671539	-1.47235	0.0298507	1	1	4350	tags=7%, list=8%, signal=7%	CELF5/CELF3/RNVU1-17/RNU1-4
GOMF_SODIUM_ION_TRANSMEMBRANE_TRANSPORTER_ACTIVITY	GOMF_SODIUM_ION_TRANSMEMBRANE_TRANSPORTER_ACTIVITY	146	-0.52594	-1.29083	0.0298507	1	1	11399	tags=30%, list=20%, signal=24%	CACNA1H/SCN10A/GRIK2/SLC6A20/SLC34A2/SLC5A8/SLC4A10/SLC6A2/GRIK1/GRIK5/SLC6A15/SLC17A3/SCN5A/SLC12A1/SLC13A1/SLC18A1/ATP1A2/SLC5A4/SCN2B/SCN7A/SLC1A6/SLC6A12/SLC6A1/ASIC2/HCN4/SLC5A9/HCN2/SLC6A7/NALCN/ASIC5/SCN3B/SLC24A5/SLC6A13/SLC17A1/GRIK3/SCN3A/SCN1A/SLC17A4/SLC6A3/SLC8A3/SLC5A7/SLC6A5/HCN1/SLC10A2
GOBP_ADENYLATE_CYCLASE_ACTIVATING_G_PROTEIN_COUPLED_RECEPTOR_SIGNALING_PATHWAY	GOBP_ADENYLATE_CYCLASE_ACTIVATING_G_PROTEIN_COUPLED_RECEPTOR_SIGNALING_PATHWAY	142	-0.538555	-1.30976	0.030303	1	1	14482	tags=35%, list=26%, signal=26%	SSTR4/GPR26/PLN/ADCY7/RXFP2/CRHR1/PDE4B/VIP/S1PR3/GPR4/ADGRE2/LGR5/PTGFR/ADGRB1/ADCY5/GHRHR/TBXA2R/CNR1/MC5R/ADCY1/ADGRL3/ADRA1B/ADGRG3/GPR6/PF4/PTGER3/CHGA/RXFP1/GPR78/DRD5/UCN3/MRAP/GALR1/ADGRG7/TSHR/ADCY8/IAPP/ADRA1A/ADGRB3/GLP1R/MC4R/PTH/LHCGR/CALCB/GPR101/GPR119/GPR12/CALCA/GCG
GOBP_AMINO_ACID_TRANSMEMBRANE_TRANSPORT	GOBP_AMINO_ACID_TRANSMEMBRANE_TRANSPORT	96	-0.595777	-1.39179	0.030303	1	1	15608	tags=35%, list=28%, signal=26%	SLC7A5P1/GRM1/SLC7A6/KCNJ10/RGS4/SLC38A11/SLC43A1/SLC7A11/SLC7A2/SLC1A7/SLC7A4/SLC3A1/SLC6A20/SLC38A3/SLC38A8/TSPO2/SLC6A15/ATP1A2/SLC1A6/SLC6A12/NTSR1/SLC7A10/SLC6A7/SLC66A1L/SLC38A4/SLC6A13/SLC7A14/SLC22A2/SLC6A18/SLC17A8/SLC6A5/SLC32A1/SLC6A19/SLC17A6
GOBP_FEEDING_BEHAVIOR	GOBP_FEEDING_BEHAVIOR	93	-0.64085	-1.48889	0.030303	1	1	10079	tags=29%, list=18%, signal=24%	RETN/GHSR/NEGR1/CNR1/HCRT/LEP/GAL/TRH/GFRAL/NPY5R/HTR1B/NPY1R/PPY/IAPP/HTR2C/MCHR1/HCRTR2/MC4R/TACR3/CARTPT/INS/NPY/CALCA/NPY2R/BSX/GCG/PYY3
GOBP_MRNA_SPLICE_SITE_SELECTION	GOBP_MRNA_SPLICE_SITE_SELECTION	48	-0.708176	-1.50429	0.030303	1	1	4350	tags=8%, list=8%, signal=8%	CELF5/CELF3/RNVU1-17/RNU1-4
GOBP_POSITIVE_REGULATION_OF_SMALL_MOLECULE_METABOLIC_PROCESS	GOBP_POSITIVE_REGULATION_OF_SMALL_MOLECULE_METABOLIC_PROCESS	140	-0.554704	-1.34595	0.030303	1	1	15467	tags=29%, list=27%, signal=21%	PFKFB2/ACTN3/PID1/TNF/AVPR1A/GUCA1B/NR4A3/ESRRB/SORBS1/APOA1/PPARGC1A/SLC45A3/NOS3/CYP7A1/MIR210/GPD1/P2RY6/IL1B/MLXIPL/BMP6/RCVRN/GHSR/MAS1/NOS1/AVP/NTSR1/PPARG/MIR107/GUCA1A/HTR2A/APOA4/GUCA2A/GUCA1C/PTH/MIR182/LHCGR/NR1H4/INS/FABP1/GCG/MIR96
GOBP_REGULATION_OF_FATTY_ACID_BIOSYNTHETIC_PROCESS	GOBP_REGULATION_OF_FATTY_ACID_BIOSYNTHETIC_PROCESS	54	-0.707102	-1.53947	0.030303	1	1	5773	tags=13%, list=10%, signal=12%	MIR548P/APOA4/GIP/MIR182/MIR132/MIR204/MIR96
GOBP_REGULATION_OF_FATTY_ACID_METABOLIC_PROCESS	GOBP_REGULATION_OF_FATTY_ACID_METABOLIC_PROCESS	98	-0.613404	-1.44246	0.030303	1	1	4467	tags=9%, list=8%, signal=8%	MIR548P/APOA4/GIP/MIR182/MIR132/INS/FABP1/MIR204/MIR96
GOCC_POSTSYNAPTIC_SPECIALIZATION_MEMBRANE	GOCC_POSTSYNAPTIC_SPECIALIZATION_MEMBRANE	109	-0.610566	-1.43901	0.030303	1	1	10653	tags=34%, list=19%, signal=28%	LRRC4C/PLPPR4/CLSTN2/CACNA1C/DCC/SORCS2/GRIK5/ADCY1/GABRB2/CHRNA9/GLRA1/LIN7A/EFNB3/GRID2/SYNDIG1/ERBB4/CDH2/ATP2B2/NETO1/CHRNA1/GRIA2/KCND2/NLGN4Y/CACNG5/GABRA5/CHRND/GSG1L/GABRA4/EPHA7/LRRTM1/SLITRK1/GRIA1/LRRTM3/SORCS3/CDH10/GRIN2B/HTR5A
GOCC_SM_LIKE_PROTEIN_FAMILY_COMPLEX	GOCC_SM_LIKE_PROTEIN_FAMILY_COMPLEX	109	-0.613979	-1.44705	0.030303	1	1	642	tags=4%, list=1%, signal=4%	OVAAL/RNU6-9/RNVU1-17/RNU1-4
GOCC_SMALL_NUCLEAR_RIBONUCLEOPROTEIN_COMPLEX	GOCC_SMALL_NUCLEAR_RIBONUCLEOPROTEIN_COMPLEX	97	-0.630228	-1.47941	0.030303	1	1	642	tags=4%, list=1%, signal=4%	OVAAL/RNU6-9/RNVU1-17/RNU1-4
GOMF_GROWTH_FACTOR_RECEPTOR_BINDING	GOMF_GROWTH_FACTOR_RECEPTOR_BINDING	140	-0.537887	-1.30514	0.030303	1	1	16225	tags=36%, list=29%, signal=26%	PDGFC/CSF3/IL1A/IL36A/ITGA5/IL23R/PTPRJ/PDGFRB/PDGFB/IL36G/FYN/IL37/CDH5/KL/GREM1/CNTF/FGF2/FGF22/IL10/IL11/IL36B/VEGFC/FGF18/IL36RN/FGF7/ESM1/IL1B/IL9/FGF16/FGF6/IL6/FLRT3/IL3/IL21/CSF2/LINGO1/ERBB4/FGF10/EPGN/FGF8/FGF5/IL1F10/EREG/ITGB3/FGF9/FGF21/FGF19/FGF20/FGF23/FGF3/FGF4
GOMF_LIGAND_GATED_ION_CHANNEL_ACTIVITY	GOMF_LIGAND_GATED_ION_CHANNEL_ACTIVITY	139	-0.549116	-1.33051	0.030303	1	1	10524	tags=35%, list=19%, signal=28%	RYR2/KCNH2/CHRNA6/GRIA3/GRIK1/P2RX1/GRIK5/P2RX2/HTR3E/HTR3C/GABRB2/CHRNA9/KCNJ9/KCNJ13/GLRA1/KCNJ4/GABRG3/HTR3B/GRID2/GABRB1/KCNJ12/ABCC9/KCNJ18/ASIC2/HCN4/CNGB1/HCN2/CHRNA1/GRIA4/ASIC5/KCNA10/GRIA2/CHRNA4/GRIK3/GABRG1/CHRNA2/GABRA5/KCNJ6/KCNJ3/CHRND/GABRA4/GRIA1/GLRA2/GABRA1/GABRA2/GABRG2/HCN1/GRIN2B
GOMF_SYMPORTER_ACTIVITY	GOMF_SYMPORTER_ACTIVITY	143	-0.528682	-1.28728	0.030303	1	1	14740	tags=32%, list=26%, signal=24%	SLC39A14/SLC6A4/SLC13A4/SLC39A8/SLC23A1/SLC45A1/SLC45A3/SLC24A4/SLC10A4/SLC12A3/SLC1A7/SLC6A20/SLC34A2/SLC5A8/SLC4A10/SLC38A3/SLC46A2/SLC6A2/SLC6A15/SLC6A17/SLC16A4/SLC17A3/SLC12A1/SLC13A1/SLC18A1/SLC5A4/SLC1A6/SLC6A12/SLC6A1/SLC5A9/SLC6A7/SLC38A4/SLC24A5/SLC16A12/SLC6A13/SLC17A1/SLC6A18/SLC17A4/SLC17A8/SLC6A3/SLC5A7/SLC6A5/SLC32A1/SLC6A19/SLC10A2/SLC17A6
HP_POOR_FINE_MOTOR_COORDINATION	HP_POOR_FINE_MOTOR_COORDINATION	54	-0.665819	-1.44959	0.030303	1	1	10209	tags=30%, list=18%, signal=24%	MAGEL2/DCC/PWAR1/PCDH19/SLC30A10/PIEZO2/DLK1/SNORD116-1/MKRN3/SCN1A/RTL1/PWRN1/NPAP1/GABRA1/GABRG2/HCN1
HP_POOR_MOTOR_COORDINATION	HP_POOR_MOTOR_COORDINATION	68	-0.654799	-1.46622	0.030303	1	1	10209	tags=26%, list=18%, signal=22%	MAGEL2/DCC/PWAR1/PCDH19/DCX/KCNQ2/SLC30A10/PIEZO2/DLK1/SNORD116-1/MKRN3/SCN1A/RTL1/PWRN1/NPAP1/GABRA1/GABRG2/HCN1
HP_PROXIMAL_TUBULOPATHY	HP_PROXIMAL_TUBULOPATHY	54	-0.670672	-1.46016	0.030303	1	1	7355	tags=7%, list=13%, signal=6%	MT-TW/ALDOB/LRP2/MT-TQ
HP_WIDENED_SUBARACHNOID_SPACE	HP_WIDENED_SUBARACHNOID_SPACE	94	-0.621236	-1.44594	0.030303	1	1	5285	tags=11%, list=9%, signal=10%	KIF1A/FRMPD4/CDH15/AGTR2/IL1RAPL1/ARX/MYT1L/TRPM3/GRIN2B/MT-TQ
GOBP_ANTIMICROBIAL_HUMORAL_IMMUNE_RESPONSE_MEDIATED_BY_ANTIMICROBIAL_PEPTIDE	GOBP_ANTIMICROBIAL_HUMORAL_IMMUNE_RESPONSE_MEDIATED_BY_ANTIMICROBIAL_PEPTIDE	78	-0.625047	-1.42452	0.0307692	1	1	9540	tags=23%, list=17%, signal=19%	DEFA3/KLK5/DEFB127/PPBP/PF4/F2/REG1A/PGC/REG3G/REG3A/KLK3/GALP/SPAG11B/MUC7/SPAG11A/REG1B/DEFA6/DEFA5
GOBP_NEGATIVE_REGULATION_OF_I_KAPPAB_KINASE_NF_KAPPAB_SIGNALING	GOBP_NEGATIVE_REGULATION_OF_I_KAPPAB_KINASE_NF_KAPPAB_SIGNALING	46	-0.733466	-1.53912	0.0307692	1	1	2185	tags=4%, list=4%, signal=4%	NR1H4/MIR16-1
GOBP_POSITIVE_REGULATION_OF_LYMPHOCYTE_APOPTOTIC_PROCESS	GOBP_POSITIVE_REGULATION_OF_LYMPHOCYTE_APOPTOTIC_PROCESS	16	-0.817021	-1.46392	0.0307692	1	1	3686	tags=19%, list=7%, signal=18%	LGALS14/LGALS16/LGALS13
GOBP_POSITIVE_REGULATION_OF_STRIATED_MUSCLE_CELL_DIFFERENTIATION	GOBP_POSITIVE_REGULATION_OF_STRIATED_MUSCLE_CELL_DIFFERENTIATION	49	-0.707968	-1.51248	0.0307692	1	1	8072	tags=20%, list=14%, signal=18%	LMOD3/PROX1/MYF5/BMP10/SHH/SMYD1/MYF6/MYOD1/MIR133B/MIR204
GOBP_REGULATION_OF_STRIATED_MUSCLE_CELL_DIFFERENTIATION	GOBP_REGULATION_OF_STRIATED_MUSCLE_CELL_DIFFERENTIATION	90	-0.592832	-1.3711	0.0307692	1	1	8072	tags=33%, list=14%, signal=29%	BMP4/NRG1/NKX2-5/RBM24/HDAC4/RGS4/MIR222/TBX1/GREM1/HDAC9/CYP26B1/MIR199A1/MYOCD/BDNF/CAV3/MIR200B/MIR590/MIR199B/PLPP7/LMOD3/PROX1/BHLHA15/MYF5/BMP10/SHH/SMYD1/MYF6/MYOD1/MIR133B/MIR204
GOBP_REGULATION_OF_TRANSLATION_NCRNA_MEDIATED	GOBP_REGULATION_OF_TRANSLATION_NCRNA_MEDIATED	74	-0.648517	-1.46375	0.0307692	1	1	8530	tags=32%, list=15%, signal=28%	MIR9-1/MIR503/MIRLET7I/MIR135B/MIR181A2/MIR138-1/MIR98/TRIM71/MIR181D/MIR107/MIR31/MIR181C/MIR125B1/MIR212/MIR483/MIR182/MIR132/MIR133B/MIR518B/MIR299/MIR134/MIR204/MIR96/MIR16-1
GOBP_REGULATION_OF_UNSATURATED_FATTY_ACID_BIOSYNTHETIC_PROCESS	GOBP_REGULATION_OF_UNSATURATED_FATTY_ACID_BIOSYNTHETIC_PROCESS	15	-0.810152	-1.41717	0.0307692	1	1	2536	tags=20%, list=4%, signal=19%	AVP/MIR132/MIR204
HP_ABNORMAL_MITOCHONDRIA_IN_MUSCLE_TISSUE	HP_ABNORMAL_MITOCHONDRIA_IN_MUSCLE_TISSUE	46	-0.715053	-1.50049	0.0307692	1	1	561	tags=4%, list=1%, signal=4%	MT-TW/MT-TQ
HP_ANTERIOR_CHAMBER_SYNECHIAE	HP_ANTERIOR_CHAMBER_SYNECHIAE	15	-0.814275	-1.42438	0.0307692	1	1	72	tags=13%, list=0%, signal=13%	ZEB1/MIR204
HP_CONCENTRIC_HYPERTROPHIC_CARDIOMYOPATHY	HP_CONCENTRIC_HYPERTROPHIC_CARDIOMYOPATHY	16	-0.81735	-1.46451	0.0307692	1	1	561	tags=12%, list=1%, signal=12%	MT-TW/MT-TQ
HP_MIXED_DEMYELINATING_AND_AXONAL_POLYNEUROPATHY	HP_MIXED_DEMYELINATING_AND_AXONAL_POLYNEUROPATHY	15	-0.820864	-1.43591	0.0307692	1	1	561	tags=13%, list=1%, signal=13%	MT-TW/MT-TQ
GOBP_NEGATIVE_REGULATION_OF_FATTY_ACID_BIOSYNTHETIC_PROCESS	GOBP_NEGATIVE_REGULATION_OF_FATTY_ACID_BIOSYNTHETIC_PROCESS	20	-0.765197	-1.39883	0.03125	1	1	5773	tags=15%, list=10%, signal=13%	MIR548P/MIR132/MIR204
GOBP_PROTEIN_HETEROTETRAMERIZATION	GOBP_PROTEIN_HETEROTETRAMERIZATION	14	-0.815287	-1.40896	0.03125	1	1	1323	tags=14%, list=2%, signal=14%	GRIN1/GRIN2B
HP_WIDENED_CEREBRAL_SUBARACHNOID_SPACE	HP_WIDENED_CEREBRAL_SUBARACHNOID_SPACE	14	-0.829812	-1.43406	0.03125	1	1	561	tags=14%, list=1%, signal=14%	MT-TW/MT-TQ
GOBP_MRNA_5_SPLICE_SITE_RECOGNITION	GOBP_MRNA_5_SPLICE_SITE_RECOGNITION	22	-0.806202	-1.493	0.031746	1	1	642	tags=36%, list=1%, signal=36%	RNVU1-15/RNVU1-3/RNVU1-1/RNVU1-19/RNVU1-4/RNVU1-6/RNVU1-17/RNU1-4
GOBP_PEPTIDE_SECRETION	GOBP_PEPTIDE_SECRETION	397	-0.467914	-1.28796	0.032967	1	1	18001	tags=30%, list=32%, signal=21%	RAB11FIP2/MIR30C1/IFNG/TTN/ABCA1/MIR93/MYH10/SYT7/CAMK2N1/STX1A/NKX6-1/PRKN/C2CD2L/F2R/ITPR2/IRS1/INHBB/PAX8/CPLX1/IL1A/CTAGE1/IL13/CASR/SLC9B2/RAB3A/CHD7/SCT/CFTR/CACNA1A/KCNA5/MTTP/CTAGE15/PFKFB2/TNF/BMP8A/ANKRD1/ABCC8/MIR199A1/TVP23A/APLN/CRHR1/NNAT/VIP/ADORA1/FFAR3/HNF1A/CYP51A1/KALRN/VEGFC/RBP4/CACNA2D2/VGF/TLR4/CPLX3/CELA2A/SNAP25/MYRIP/CTAGE6/IL1B/BRSK2/TGFB2/MIR199B/ADCY5/HNF4A/ZBED6/BMP6…
GOBP_EXTERNAL_ENCAPSULATING_STRUCTURE_ORGANIZATION	GOBP_EXTERNAL_ENCAPSULATING_STRUCTURE_ORGANIZATION	395	-0.469286	-1.28892	0.0333333	1	1	21344	tags=53%, list=38%, signal=33%	ENG/VWA1/SCX/NTN4/TNC/MMP13/MMP12/MPZL3/MMP11/ETS1/SPARC/LUM/SOX9/MMP15/TIMP2/ITGA10/CLASP2/LAMB4/TGFBI/SH3PXD2B/TNXA/HPN/PHLDB2/MMP23B/MMP21/ANGPTL7/LAMC3/LAMC1/DCN/MFAP4/COL9A1/ECM2/COL11A2/TGFBR1/CTSG/COL18A1/JAM2/COL27A1/ITGB7/MMP2/COL3A1/GPM6B/ITGAX/COL1A1/SMPD3/BMP2/FURIN/ITGAD/SERPINE1/COL6A1/MMP24/EFEMP2/HSPG2/CYP1B1/LAMB1/CREB3L1/ANTXR1/AEBP1/PLOD3/COL1A2/CTSL/COL6A2/FLRT2/MMP20/SFRP2/FM…
GOCC_CATION_CHANNEL_COMPLEX	GOCC_CATION_CHANNEL_COMPLEX	222	-0.506873	-1.31733	0.0352941	1	1	11797	tags=31%, list=21%, signal=24%	KCNMB4/SNAP25/CACNB2/KCNJ1/CACNG1/CACNA1H/SCN10A/KCNK4/GRIK2/KCNQ3/KCNV2/RYR2/KCNE4/KCNH2/TRPC4/CACNA1C/GRIA3/LRRC52/CACNA1B/GRIK5/KCNA4/PKD1L1/DPP6/SCN5A/CATSPER4/KCNJ4/NOS1/HTR3B/SCN2B/SCN7A/ABCC9/LRRC38/KCNE5/HCN4/CNGB1/KCNQ2/UNC80/HCN2/GRIA4/SHANK1/SCN3B/KCNA2/KCNA10/KCNN1/MICU3/KCNG2/PKD1L3/KCNB1/KCNF1/GRIA2/KCND2/GRIK3/CACNG5/CACNA1E/CACNA1S/SCN3A/KCNJ6/SCN1A/KCNJ3/TRPC7/TRPC5/GRIA1/KCNV1/K…
GOMF_SECONDARY_ACTIVE_TRANSMEMBRANE_TRANSPORTER_ACTIVITY	GOMF_SECONDARY_ACTIVE_TRANSMEMBRANE_TRANSPORTER_ACTIVITY	239	-0.492683	-1.28275	0.0352941	1	1	15764	tags=32%, list=28%, signal=23%	SLC5A1/SLCO4A1/SLC7A6/SLC45A2/SLC4A7/SLC25A31/SLCO6A1/ATP1A3/SLC26A8/SLC39A14/SLC6A4/SLCO5A1/SLC13A4/SLC39A8/SLC22A7/SLC9C2/SLC19A1/SLCO1A2/SLC23A1/SLC45A1/SLC45A3/SLC11A1/SLC24A4/SLC7A11/SLC10A4/SLC12A3/SLC1A7/SLC6A20/SLC34A2/SLC5A8/SLC4A10/SLC38A3/SLC22A9/SLC4A3/SLC46A2/SLC6A2/CDH17/SLC6A15/SLCO1C1/SLC6A17/SLC16A4/SLC22A8/SLC17A3/SLC12A1/SLC13A1/SLC18A1/SLCO1B1/SLC5A4/SLC26A10/SLC4A1/SLC1A6/SLC…
GOBP_CELLULAR_KETONE_METABOLIC_PROCESS	GOBP_CELLULAR_KETONE_METABOLIC_PROCESS	253	-0.486291	-1.27124	0.0361446	1	1	13903	tags=18%, list=25%, signal=13%	APOA1/PPARGC1A/SLC45A3/PDK4/SLC7A11/ADH4/FGFR4/MIR33A/CYP7A1/CYP11A1/GPD1/IL1B/CACNA1H/MLXIPL/BMP6/CYP11B1/SRD5A2/GHSR/SLC22A13/CNR1/TDO2/AKR1C4/KMO/AVP/CYP11B2/CYP2B6/PROX1/PPARG/ATCAY/ACMSD/PSMB11/MIR548P/APOA4/CYP17A1/BMP5/GIP/FGF19/MALRD1/MIR182/MIR132/NR1H4/INS/FABP1/MIR204/MIR96
GOBP_POSITIVE_REGULATION_OF_PEPTIDE_SECRETION	GOBP_POSITIVE_REGULATION_OF_PEPTIDE_SECRETION	151	-0.524864	-1.31197	0.0422535	1	1	11875	tags=18%, list=21%, signal=14%	TLR4/MYRIP/TGFB2/MIR199B/BMP6/GHRHR/ACHE/RASL10B/PDX1/TNFSF11/TRH/FFAR1/UCN3/FGB/OR51E2/ADCY8/NR0B2/GIP/FGA/RFX6/FGG/CRH/SLC30A8/NR1H4/INS/NPY2R/GCG
GOBP_REGULATION_OF_INTRINSIC_APOPTOTIC_SIGNALING_PATHWAY	GOBP_REGULATION_OF_INTRINSIC_APOPTOTIC_SIGNALING_PATHWAY	157	-0.521294	-1.30685	0.0422535	1	1	2536	tags=4%, list=4%, signal=4%	PDX1/NME5/MAGEA3/MIR132/INS/MIR16-1
GOMF_LIPASE_ACTIVITY	GOMF_LIPASE_ACTIVITY	131	-0.542672	-1.32888	0.0428571	1	1	5976	tags=11%, list=11%, signal=10%	PLA2G2A/CLC/PLA2G2C/PLCZ1/LIPF/CES5A/CHRM5/PLA2G5/PNLIPRP3/PNLIPRP1/PLA2G12B/PNPLA5/PNLIPRP2/OC90/LGALS13
HP_CARDIAC_CONDUCTION_ABNORMALITY	HP_CARDIAC_CONDUCTION_ABNORMALITY	130	-0.541322	-1.31126	0.0434783	1	1	14457	tags=25%, list=26%, signal=18%	MYH6/SEMA3A/SYNE1/KCNJ8/AGXT/MT-TL1/ACTN2/TLL1/CACNB2/SCN10A/DYSF/MT-TV/KCNH2/CACNA1C/GJA5/SCN5A/RMRP/SCN2B/ABCC9/KCNJ18/KCNE5/CDH2/MT-TW/HCN4/SCN3B/TBX20/TTR/GATA4/CACNA1S/ACTC1/TBX5/MT-TQ
GOMF_MRNA_BINDING	GOMF_MRNA_BINDING	485	-0.438918	-1.22132	0.043956	1	1	7960	tags=13%, list=14%, signal=11%	MIR491/MIR140/MIR302A/MIR135B/HYDIN2/MIR661/MIR181A2/MIR138-1/MIR1224/MIR98/MIR1277/MIR302D/MIR181D/PCBP3/MIR582/MIR146B/MIR107/MIR31/MIR181C/MIR548C/MIR920/MT-TS1/MIR139/MIR548P/MIR125B1/MIR374A/MIR30B/MIR518A1/KHDRBS2/MIR455/SRRM4/MIR409/CELF5/RBFOX1/CELF3/MIR212/MIR32/MIR519B/MIR153-1/MIR301B/A1CF/MIR644A/MIR483/MIR182/MIR132/MIR449A/ZCCHC13/LIN28A/MIR494/MIR133B/MIR767/MIR129-1/MIR876/MIR411/…
GOBP_REGULATION_OF_POSTSYNAPTIC_MEMBRANE_POTENTIAL	GOBP_REGULATION_OF_POSTSYNAPTIC_MEMBRANE_POTENTIAL	136	-0.543659	-1.32382	0.0441176	1	1	10425	tags=28%, list=18%, signal=23%	CHRNA6/GRIA3/GRIK1/P2RX1/GRIK5/P2RX2/HCRT/GABRB2/CHRNA9/GLRA1/GABRG3/PPP1R9A/GRID2/GABRB1/NTSR1/NETO1/CHRNA1/SEZ6/SHANK1/CUX2/MIR30B/KCND2/CHRNA4/GRIK3/GABRG1/CHRNA2/GABRA5/TMEM108/CHRND/SLC8A3/GABRA4/GRIA1/GLRA2/GABRA1/GABRA2/GABRG2/GRIN2B/NPY2R
GOCC_PRESYNAPTIC_MEMBRANE	GOCC_PRESYNAPTIC_MEMBRANE	137	-0.513381	-1.25324	0.0441176	1	1	11860	tags=27%, list=21%, signal=21%	CPLX3/SNAP25/GRIK2/PCDH17/NTNG2/GPM6A/IL31RA/SLC6A2/P2RX1/GRIK5/CNR1/UNC13A/GLRA1/EFNB3/SLC1A6/ERBB4/CDH2/SNPH/CNTN6/PTPRD/KCNA2/HTR1B/CNTNAP4/CNTN5/GRIK3/HTR2A/ADCY8/ADRA1A/GABRA5/GRM3/UNC13C/KCNJ3/SLC6A3/SLC6A5/KCNC2/CDH10/CDH9
GOMF_HORMONE_ACTIVITY	GOMF_HORMONE_ACTIVITY	122	-0.547378	-1.30685	0.0441176	1	1	8242	tags=29%, list=15%, signal=25%	TSHB/LEP/PNOC/AVP/GAL/CCL25/AGT/TRH/THPO/BMP10/UCN3/CHGB/PPY/SPX/NPPB/SST/IAPP/TTR/GIP/GUCA2A/RETNLB/PTH/INSL4/CRH/CGA/CARTPT/PRL/CALCB/INS/GALP/NPY/CALCA/INS-IGF2/GCG/PYY3
GOBP_CEREBRAL_CORTEX_GABAERGIC_INTERNEURON_DIFFERENTIATION	GOBP_CEREBRAL_CORTEX_GABAERGIC_INTERNEURON_DIFFERENTIATION	10	-0.844869	-1.38806	0.0447761	1	1	6758	tags=60%, list=12%, signal=53%	DLX1/ASCL1/DLX2/NKX2-1/ARX/FEZF2
GOBP_POSITIVE_REGULATION_OF_CARDIAC_MUSCLE_CELL_DIFFERENTIATION	GOBP_POSITIVE_REGULATION_OF_CARDIAC_MUSCLE_CELL_DIFFERENTIATION	12	-0.818863	-1.39166	0.0447761	1	1	72	tags=25%, list=0%, signal=25%	GREM1/MYOCD/MIR204
GOBP_POSITIVE_REGULATION_OF_CHOLESTEROL_METABOLIC_PROCESS	GOBP_POSITIVE_REGULATION_OF_CHOLESTEROL_METABOLIC_PROCESS	10	-0.8631	-1.41802	0.0447761	1	1	2999	tags=20%, list=5%, signal=19%	MIR182/MIR96
GOBP_POSITIVE_REGULATION_OF_STRIATED_MUSCLE_CELL_APOPTOTIC_PROCESS	GOBP_POSITIVE_REGULATION_OF_STRIATED_MUSCLE_CELL_APOPTOTIC_PROCESS	12	-0.821857	-1.39674	0.0447761	1	1	4537	tags=17%, list=8%, signal=15%	POU4F2/MIR16-1
GOBP_REGULATION_OF_CONNECTIVE_TISSUE_REPLACEMENT	GOBP_REGULATION_OF_CONNECTIVE_TISSUE_REPLACEMENT	10	-0.856166	-1.40662	0.0447761	1	1	21	tags=20%, list=0%, signal=20%	MIR15B/MIR16-1
GOCC_BRUSH_BORDER	GOCC_BRUSH_BORDER	101	-0.571796	-1.34939	0.0447761	1	1	12013	tags=28%, list=21%, signal=22%	FOLR1/PDZK1/MME/USH1C/SLC3A1/MYO7B/DAB1/SHANK2/SLC34A2/CDHR2/ENPEP/SLC17A3/NPC1L1/SOAT2/CDHR5/PDZD3/VIL1/SLC2A2/CUBN/DRD5/SLC22A12/ABCC2/SLC6A18/LRP2/SI/TMPRSS15/SLC6A19/SLC26A3
GOMF_POTASSIUM_CHANNEL_ACTIVITY	GOMF_POTASSIUM_CHANNEL_ACTIVITY	120	-0.545615	-1.29499	0.0447761	1	1	12067	tags=40%, list=21%, signal=32%	FXYD4/KCNK3/KCNMB4/KCNN3/SNAP25/KCNJ1/KCNK4/GRIK2/KCNQ3/KCNV2/KCNE4/KCNH2/GRIK1/LRRC52/GRIK5/KCNA4/KCNJ9/KCNJ13/KCNJ4/KCNK9/KCNJ12/ABCC9/LRRC38/KCNH7/KCNJ18/KCNE5/KCNK17/HCN4/KCNQ2/HCN2/KCNA2/KCNA10/KCNN1/KCNG2/KCNB1/KCNT2/KCNF1/KCND2/KCNK12/GRIK3/KCNH8/KCNJ6/KCNJ3/KCNH5/KCNV1/KCNC2/HCN1/KCNK16
HP_ANTEVERTED_EARS	HP_ANTEVERTED_EARS	10	-0.86524	-1.42153	0.0447761	1	1	1228	tags=20%, list=2%, signal=20%	CACNA1G/FGF3
HP_VENTRICULAR_ARRHYTHMIA	HP_VENTRICULAR_ARRHYTHMIA	115	-0.553205	-1.31804	0.0447761	1	1	14598	tags=29%, list=26%, signal=21%	KCNE1/ANK2/SEMA3A/SYNE1/PLN/KCNJ8/MT-TL1/CAV3/SLC12A3/CACNB2/SCN10A/MYL2/MT-TV/DTNA/RYR2/KCNH2/CACNA1C/GJA5/MYL3/DPP6/SCN5A/SCN2B/ABCC9/KCNJ18/KCNE5/CDH2/MT-TW/HCN4/SCN3B/TRDN/CACNA1S/ACTC1/MT-TQ
GOBP_ERK1_AND_ERK2_CASCADE	GOBP_ERK1_AND_ERK2_CASCADE	312	-0.48909	-1.31358	0.0449438	1	1	17849	tags=33%, list=32%, signal=22%	CALCR/S100A7/PDGFRA/HAND2/CAMK2N1/GPBAR1/CCR1/FERMT2/F2R/NODAL/CHI3L1/CCL3/PDGFC/CCL16/NEK10/RPS6KA6/BMP4/CASR/CCL23/NRP1/MIR27B/IL26/PDGFRB/MIR185/LIF/CCL13/MARCO/PDGFB/SPRY3/EMILIN1/TNF/MIR222/TEK/ANGPT1/TF/SSTR4/FGF2/PTPRR/CCL11/DUSP4/FLT4/ALKAL2/KDR/FGFR4/CCL8/CCL3L3/FN1/CCL18/CCL7/TIMP3/ARHGAP8/CD36/FGF18/AKAP12/TLR4/P2RY6/IL1B/MIR27A/SPRED3/CCL15/CRYBA1/SPRY4/CCL1/NTRK1/MIR200C/CHRNA9/PKHD1…
GOCC_GLUTAMATERGIC_SYNAPSE	GOCC_GLUTAMATERGIC_SYNAPSE	307	-0.469535	-1.26027	0.0449438	1	1	13835	tags=24%, list=24%, signal=18%	LRFN5/GUCY1A1/CACNG2/PTPRO/CDH11/NTNG1/SLITRK2/SH3GL2/ACTN2/GRIN3A/KCNA3/CTTNBP2/LRRTM2/DNM3/DLGAP2/ARC/PPP1R1B/SNAP25/NPTX2/GRIK2/PCDH17/NTNG2/GPM6A/LRRC4C/BSN/PLPPR4/CLSTN2/FLRT3/GHSR/NRG3/P2RX1/ACTBL2/GRIK5/CNR1/ADCY1/ADGRL3/SLC6A17/DGKB/EFNB3/PPP1R9A/GRID2/SLC1A6/ERBB4/DLGAP1/SYT6/GPC6/ATP2B2/SLITRK4/NETO1/PPFIA2/TNR/CDH8/PTPRD/CPLX2/ITGB3/KCND2/GRIK3/HTR2A/NLGN4Y/ADCY8/CACNG5/IL1RAPL1/ADRA1A…
GOBP_LIMBIC_SYSTEM_DEVELOPMENT	GOBP_LIMBIC_SYSTEM_DEVELOPMENT	98	-0.573919	-1.3496	0.0454545	1	1	8913	tags=21%, list=16%, signal=18%	MAS1/ATP1A2/NR0B1/FOXB1/PROX1/DLX1/EPHA5/NEUROD1/DLX2/NKX2-1/CDK5R2/TMEM108/POU3F2/CRH/HSD3B2/SOX3/NEUROD6/SLC32A1/GSX1/FEZF2/HTR5A
GOBP_MEMBRANE_DISRUPTION_IN_OTHER_ORGANISM	GOBP_MEMBRANE_DISRUPTION_IN_OTHER_ORGANISM	11	-0.861583	-1.4178	0.0454545	1	1	1140	tags=27%, list=2%, signal=27%	DEFA3/DEFA6/DEFA5
GOBP_POSITIVE_REGULATION_OF_PEPTIDE_HORMONE_SECRETION	GOBP_POSITIVE_REGULATION_OF_PEPTIDE_HORMONE_SECRETION	95	-0.585195	-1.36427	0.0454545	1	1	8050	tags=18%, list=14%, signal=15%	PDX1/TNFSF11/TRH/FFAR1/UCN3/FGB/ADCY8/NR0B2/GIP/FGA/RFX6/FGG/CRH/SLC30A8/NR1H4/INS/GCG
GOBP_REGULATION_OF_PEPTIDE_SECRETION	GOBP_REGULATION_OF_PEPTIDE_SECRETION	304	-0.486289	-1.29651	0.0454545	1	1	11875	tags=32%, list=21%, signal=25%	MIR30C1/IFNG/TTN/MIR93/MYH10/SYT7/CAMK2N1/STX1A/NKX6-1/PRKN/C2CD2L/F2R/ITPR2/IRS1/INHBB/PAX8/IL1A/IL13/CASR/SLC9B2/CHD7/SCT/CFTR/CACNA1A/KCNA5/PFKFB2/TNF/BMP8A/ANKRD1/ABCC8/MIR199A1/APLN/NNAT/ADORA1/FFAR3/CYP51A1/KALRN/VEGFC/RBP4/CACNA2D2/TLR4/CELA2A/SNAP25/MYRIP/IL1B/BRSK2/TGFB2/MIR199B/ADCY5/HNF4A/ZBED6/BMP6/GHRHR/ACHE/IL6/RASL10B/CACNA1C/GHSR/CNR1/DPP4/LEP/PDX1/TNFSF11/CHGA/TRH/SYT9/FFAR1/SLC2…
GOBP_REGULATION_OF_VASCULAR_WOUND_HEALING	GOBP_REGULATION_OF_VASCULAR_WOUND_HEALING	11	-0.872284	-1.43541	0.0454545	1	1	180	tags=18%, list=0%, signal=18%	MIR200B/MIR1298
GOBP_RESPONSE_TO_LIGHT_INTENSITY	GOBP_RESPONSE_TO_LIGHT_INTENSITY	11	-0.832922	-1.37063	0.0454545	1	1	1421	tags=27%, list=3%, signal=27%	RS1/GNAT1/KCNC2
HP_LACRIMAL_DUCT_STENOSIS	HP_LACRIMAL_DUCT_STENOSIS	11	-0.861102	-1.41701	0.0454545	1	1	1240	tags=18%, list=2%, signal=18%	EYA1/PAX1
GOBP_ORGANIC_ACID_TRANSPORT	GOBP_ORGANIC_ACID_TRANSPORT	324	-0.477048	-1.27864	0.045977	1	1	14107	tags=27%, list=25%, signal=20%	SLC19A1/SLCO1A2/ABCB1/SLC23A1/SLC11A1/ADORA1/SLC43A1/SLC7A11/SLC10A4/CYP7A1/SLC25A47/CD36/SLC51B/SLC7A2/FOLR1/SNAP25/SLC1A7/IL1B/SLC7A4/SLC3A1/SLC6A20/SLC5A8/SLC38A3/TRPC4/SLC22A9/SLC38A8/PLA2G2F/SLC22A13/TSPO2/SLC6A15/SLCO1C1/PLA2G2E/SLC6A17/ATP1A2/SLCO1B1/SLC26A10/AKR1C4/KMO/LEP/SLC29A4/AVP/SLC1A6/AQP9/TNFSF11/MPC1L/SLC6A12/SLC6A1/NTSR1/PPFIA2/SLC7A10/PPARG/SLC6A7/FOLR3/SLC66A1L/TRH/SLC38A4/NPY…
GOMF_ACTIVE_TRANSMEMBRANE_TRANSPORTER_ACTIVITY	GOMF_ACTIVE_TRANSMEMBRANE_TRANSPORTER_ACTIVITY	302	-0.464201	-1.23455	0.045977	1	1	15764	tags=30%, list=28%, signal=22%	CFTR/SLC5A1/SLCO4A1/SLC7A6/SLC45A2/SLC4A7/ATP6V1G2/SLC25A31/SLCO6A1/ATP1A3/SLC26A8/SLC39A14/SLC6A4/SLCO5A1/ABCC8/SLC13A4/SLC39A8/SLC22A7/SLC9C2/SLC19A1/SLCO1A2/ABCB1/SLC23A1/SLC45A1/SLC45A3/SLC11A1/SLC24A4/SLC7A11/SLC10A4/SLC12A3/ABCA6/ABCB4/SLC1A7/SLC6A20/SLC34A2/SLC5A8/SLC4A10/SLC38A3/SLC22A9/SLC4A3/SLC46A2/SLC6A2/CDH17/SLC6A15/SLCO1C1/SLC6A17/SLC16A4/SLC22A8/SLC17A3/ABCC12/SLC12A1/SLC13A1/SLC1…
HP_ATTENTION_DEFICIT_HYPERACTIVITY_DISORDER	HP_ATTENTION_DEFICIT_HYPERACTIVITY_DISORDER	296	-0.465935	-1.23139	0.0465116	1	1	8496	tags=12%, list=15%, signal=10%	MAGEL2/DOCK3/CACNA1B/GABRB2/SEMA3E/PWAR1/PAH/CDH2/HMGA2/FGF8/GRIA4/KCNA2/DRD5/SHH/PIEZO2/KCNB1/SNORD116-1/FRMPD4/MKRN3/AGTR2/IL1RAPL1/GATA4/GABRA5/ARX/TDGF1/SCN3A/PWRN1/MYT1L/SLITRK1/LHCGR/NPAP1/GABRA1/GABRA2/GABRG2/HCN1
HP_ABNORMAL_BRAIN_LACTATE_LEVEL_BY_MRS	HP_ABNORMAL_BRAIN_LACTATE_LEVEL_BY_MRS	23	-0.766455	-1.41339	0.046875	1	1	561	tags=9%, list=1%, signal=9%	MT-TW/MT-TQ
GOBP_POTASSIUM_ION_TRANSPORT	GOBP_POTASSIUM_ION_TRANSPORT	230	-0.487271	-1.26821	0.0470588	1	1	15399	tags=36%, list=27%, signal=26%	KCNK15/KCNJ10/RGS4/KCNH4/ATP1A3/KCNN2/KCNE1/ANK2/ABCC8/SLC9C2/ATP1B2/VIP/ADORA1/SLC24A4/KCNJ8/KCNQ4/CASQ2/KCNG1/CAV3/ACTN2/SLC12A3/KCNA3/FXYD4/KCNK3/KCNMB4/KCNN3/SNAP25/KCNJ1/KCNK4/KCNQ3/KCNV2/KCNE4/KCNH2/LRRC52/EDN3/GJA5/KCNA4/HCRT/KCNJ9/DPP6/KCNJ13/SLC12A1/KCNJ4/NOS1/ATP1A2/KCNK9/KCNJ12/ABCC9/KCNU1/LRRC38/KCNH7/KCNJ18/GAL/KCNE5/KCNK17/HCN4/NETO1/KCNQ2/HCN2/NALCN/KCNA2/KCNA10/KCNN1/SLC24A5/KCNG2…
GOBP_REGULATION_OF_CELLULAR_RESPONSE_TO_GROWTH_FACTOR_STIMULUS	GOBP_REGULATION_OF_CELLULAR_RESPONSE_TO_GROWTH_FACTOR_STIMULUS	287	-0.469959	-1.24398	0.0470588	1	1	16355	tags=29%, list=29%, signal=21%	ONECUT1/ITGA5/BCL9L/FSTL3/MIR17HG/MIR149/SMAD6/CITED1/SPRY3/EMILIN1/CDH5/DAB2/ADAMTS3/GREM1/ACVRL1/ADAMTSL2/SOST/CHST11/FGF2/FZD4/MIR199A1/CHRD/APLN/MYOCD/FBN1/SULF1/DOK5/HIPK2/ADGRA2/JCAD/PCSK6/CAV3/RBPMS2/VEGFC/CHRDL1/NOG/NTRK3/GDF2/FGF18/HTRA4/FOLR1/XDH/IL1B/VTN/FGF16/SPRED3/CCBE1/SPRY4/MIR15B/MIR200C/ADAMTS12/ZNF423/MIRLET7F1/MIRLET7G/MIR503/TMPRSS6/SOSTDC1/MIR140/GREM2/FGF10/CRB2/SFRP5/MT3/P…
GOCC_DISTAL_AXON	GOCC_DISTAL_AXON	287	-0.475168	-1.25777	0.0470588	1	1	12094	tags=21%, list=21%, signal=16%	RASGRF1/IGF2BP1/CPLX3/SNAP25/SNCB/BRSK2/GRIK2/SHANK2/GPM6A/SLC4A10/FGF13/FLRT3/FSCN3/GRIK5/CNR1/DSCAM/GAP43/STMN2/TENM2/UNC13A/FRMD7/CPLX4/GLRA1/SLC18A1/BRSK1/PPP1R9A/PNOC/NTSR1/CNGB1/KIF5C/UNC5C/L1CAM/CDH8/ATCAY/CBARP/KCNA2/UCN3/HTR1B/CPLX2/TUBB3/REG1A/SLC18A3/GRIK3/CDK5R2/UNC13C/PCDHGB1/OTX2/SLC17A8/PTPRN/SLC8A3/PCDH9/TRPC5/LRRTM1/SCGN/SLC32A1/PDYN/NRSN1/KCNC2/CALCA
GOBP_TELENCEPHALON_DEVELOPMENT	GOBP_TELENCEPHALON_DEVELOPMENT	228	-0.488949	-1.27172	0.047619	1	1	9012	tags=17%, list=16%, signal=14%	FGF13/DRAXIN/INHBA/NRG3/SCN5A/MAS1/SALL1/ATP1A2/EFNA2/ERBB4/CDH2/FOXB1/PROX1/FGF8/TNR/SLITRK5/DLX1/ASCL1/EPHA5/NEUROD1/SHH/LHX1/DLX2/NKX2-1/CDK5R2/TMEM108/ARX/POU3F2/SLC8A3/PLXNA4/HSD3B2/RFX4/ATOH1/NEUROD6/SLC32A1/POU3F3/NPY/FEZF2/HTR5A
GOCC_DENDRITE_MEMBRANE	GOCC_DENDRITE_MEMBRANE	43	-0.704203	-1.44279	0.047619	1	1	5738	tags=26%, list=10%, signal=23%	KCNB1/REG1A/GABRG1/GABRA5/GABRA4/TACR3/GRIA1/GABRA1/GABRA2/GABRG2/KCNC2
HP_FLUCTUATIONS_IN_CONSCIOUSNESS	HP_FLUCTUATIONS_IN_CONSCIOUSNESS	22	-0.763323	-1.41359	0.047619	1	1	561	tags=18%, list=1%, signal=18%	MT-TL1/SNCB/MT-TW/MT-TQ
HP_AUTISM	HP_AUTISM	177	-0.508576	-1.31871	0.0493827	1	1	10209	tags=15%, list=18%, signal=12%	MAGEL2/CACNA1C/GRIA3/CACNA1B/GJA5/GABRB2/SEMA3E/PWAR1/PAH/KCNA2/HNF1B/KCNB1/SNORD116-1/LHX1/MKRN3/IL1RAPL1/GABRA5/SCN3A/OTX2/PWRN1/PROKR2/SOX3/NPAP1/GABRA2/GABRG2/HCN1
CHOL
ID	Description	setSize	enrichmentScore	NES	pvalue	p.adjust	qvalues	rank	leading_edge	core_enrichment
GOBP_NEGATIVE_REGULATION_OF_LIPID_LOCALIZATION	GOBP_NEGATIVE_REGULATION_OF_LIPID_LOCALIZATION	61	0.748038	1.56825	0.0163934	1	1	499	tags=7%, list=1%, signal=7%	MIR33B/MIR30C1/MIR128-1/MIR26A1
GOBP_SMOOTH_MUSCLE_CELL_MIGRATION	GOBP_SMOOTH_MUSCLE_CELL_MIGRATION	77	0.740516	1.60374	0.0169492	1	1	3778	tags=6%, list=7%, signal=6%	MIR638/MIR26A1/MIR218-1/FGF9/ADIPOQ
GOBP_REGULATION_OF_GLYCOPROTEIN_METABOLIC_PROCESS	GOBP_REGULATION_OF_GLYCOPROTEIN_METABOLIC_PROCESS	58	0.778281	1.63965	0.0172414	1	1	602	tags=5%, list=1%, signal=5%	MIR644A/MIR31/MIR153-1
GOBP_NEGATIVE_REGULATION_OF_LIPID_TRANSPORT	GOBP_NEGATIVE_REGULATION_OF_LIPID_TRANSPORT	44	0.781929	1.5892	0.0178571	1	1	499	tags=9%, list=1%, signal=9%	MIR33B/MIR30C1/MIR128-1/MIR26A1
GOBP_VASCULAR_ASSOCIATED_SMOOTH_MUSCLE_CELL_MIGRATION	GOBP_VASCULAR_ASSOCIATED_SMOOTH_MUSCLE_CELL_MIGRATION	32	0.854984	1.63604	0.0178571	1	1	3778	tags=16%, list=7%, signal=15%	MIR638/MIR26A1/MIR218-1/FGF9/ADIPOQ
GOBP_MEMBRANE_RAFT_ASSEMBLY	GOBP_MEMBRANE_RAFT_ASSEMBLY	11	0.932256	1.45554	0.0181818	1	1	824	tags=9%, list=1%, signal=9%	MIR138-1
GOBP_NEGATIVE_REGULATION_OF_PROTEIN_POLYUBIQUITINATION	GOBP_NEGATIVE_REGULATION_OF_PROTEIN_POLYUBIQUITINATION	11	0.924344	1.44319	0.0181818	1	1	824	tags=9%, list=1%, signal=9%	MIR138-1
GOBP_POSITIVE_REGULATION_OF_SPROUTING_ANGIOGENESIS	GOBP_POSITIVE_REGULATION_OF_SPROUTING_ANGIOGENESIS	27	0.844108	1.52541	0.0181818	1	1	686	tags=11%, list=1%, signal=11%	MIR31/MIR1224/MIR30B
GOBP_POSITIVE_REGULATION_OF_TRANSLATIONAL_INITIATION	GOBP_POSITIVE_REGULATION_OF_TRANSLATIONAL_INITIATION	30	0.824999	1.56547	0.0181818	1	1	6610	tags=13%, list=12%, signal=12%	DAZ1/DAZ2/BOLL/DAZL
GOMF_PEPTIDE_ALPHA_N_ACETYLTRANSFERASE_ACTIVITY	GOMF_PEPTIDE_ALPHA_N_ACETYLTRANSFERASE_ACTIVITY	11	0.915148	1.42883	0.0181818	1	1	269	tags=9%, list=0%, signal=9%	NAA11
GOBP_NEGATIVE_REGULATION_OF_GLYCOPROTEIN_METABOLIC_PROCESS	GOBP_NEGATIVE_REGULATION_OF_GLYCOPROTEIN_METABOLIC_PROCESS	25	0.922712	1.65351	0.0185185	1	1	602	tags=12%, list=1%, signal=12%	MIR644A/MIR31/MIR153-1
GOBP_N_TERMINAL_PROTEIN_AMINO_ACID_ACETYLATION	GOBP_N_TERMINAL_PROTEIN_AMINO_ACID_ACETYLATION	17	0.866363	1.41466	0.0192308	1	1	269	tags=6%, list=0%, signal=6%	NAA11
GOBP_REGULATION_OF_PHOSPHOLIPID_BIOSYNTHETIC_PROCESS	GOBP_REGULATION_OF_PHOSPHOLIPID_BIOSYNTHETIC_PROCESS	17	0.858532	1.40187	0.0192308	1	1	266	tags=6%, list=0%, signal=6%	MIR30C1
GOBP_TRNA_THREONYLCARBAMOYLADENOSINE_METABOLIC_PROCESS	GOBP_TRNA_THREONYLCARBAMOYLADENOSINE_METABOLIC_PROCESS	17	0.885314	1.44561	0.0192308	1	1	3100	tags=12%, list=5%, signal=11%	CTAG1A/CTAG2
GOCC_CLATHRIN_ADAPTOR_COMPLEX	GOCC_CLATHRIN_ADAPTOR_COMPLEX	24	-0.902371	-1.60719	0.0192308	1	1	321	tags=8%, list=1%, signal=8%	AP1M1/SLC18A3
GOCC_N_TERMINAL_PROTEIN_ACETYLTRANSFERASE_COMPLEX	GOCC_N_TERMINAL_PROTEIN_ACETYLTRANSFERASE_COMPLEX	10	0.929332	1.37262	0.0192308	1	1	269	tags=10%, list=0%, signal=10%	NAA11
GOCC_TRANS_GOLGI_NETWORK_TRANSPORT_VESICLE_MEMBRANE	GOCC_TRANS_GOLGI_NETWORK_TRANSPORT_VESICLE_MEMBRANE	15	-0.920154	-1.44356	0.0192308	1	1	321	tags=27%, list=1%, signal=27%	CLTB/RASSF9/NCALD/SLC18A3
GOMF_TRANSLATION_ACTIVATOR_ACTIVITY	GOMF_TRANSLATION_ACTIVATOR_ACTIVITY	14	0.85501	1.33843	0.0192308	1	1	6610	tags=29%, list=12%, signal=25%	DAZ1/DAZ2/BOLL/DAZL
GOBP_NEGATIVE_REGULATION_OF_AMYLOID_PRECURSOR_PROTEIN_BIOSYNTHETIC_PROCESS	GOBP_NEGATIVE_REGULATION_OF_AMYLOID_PRECURSOR_PROTEIN_BIOSYNTHETIC_PROCESS	16	0.944771	1.50558	0.0196078	1	1	602	tags=19%, list=1%, signal=19%	MIR644A/MIR31/MIR153-1
GOBP_NEGATIVE_REGULATION_OF_LEUKOCYTE_ADHESION_TO_VASCULAR_ENDOTHELIAL_CELL	GOBP_NEGATIVE_REGULATION_OF_LEUKOCYTE_ADHESION_TO_VASCULAR_ENDOTHELIAL_CELL	12	0.904684	1.37677	0.0196078	1	1	458	tags=17%, list=1%, signal=17%	MIRLET7G/MIR31
GOBP_NEGATIVE_REGULATION_OF_NEUROINFLAMMATORY_RESPONSE	GOBP_NEGATIVE_REGULATION_OF_NEUROINFLAMMATORY_RESPONSE	16	0.865642	1.37948	0.0196078	1	1	499	tags=12%, list=1%, signal=12%	MIR181C/MIR26A1
GOBP_NEGATIVE_REGULATION_OF_TYROSINE_PHOSPHORYLATION_OF_STAT_PROTEIN	GOBP_NEGATIVE_REGULATION_OF_TYROSINE_PHOSPHORYLATION_OF_STAT_PROTEIN	16	-0.937273	-1.46238	0.0196078	1	1	44	tags=12%, list=0%, signal=12%	SOCS1/MIR98
GOBP_NEGATIVE_REGULATION_OF_VASCULAR_ASSOCIATED_SMOOTH_MUSCLE_CELL_DIFFERENTIATION	GOBP_NEGATIVE_REGULATION_OF_VASCULAR_ASSOCIATED_SMOOTH_MUSCLE_CELL_DIFFERENTIATION	12	0.887774	1.35103	0.0196078	1	1	3139	tags=17%, list=6%, signal=16%	MIR26A1/FGF9
GOCC_CLATHRIN_COAT_OF_COATED_PIT	GOCC_CLATHRIN_COAT_OF_COATED_PIT	16	-0.951518	-1.48461	0.0196078	1	1	321	tags=19%, list=1%, signal=19%	CLTB/AP2M1/SLC18A3
GOCC_RNAI_EFFECTOR_COMPLEX	GOCC_RNAI_EFFECTOR_COMPLEX	16	0.897422	1.43013	0.0196078	1	1	458	tags=6%, list=1%, signal=6%	MIR31
GOBP_AMYLOID_PRECURSOR_PROTEIN_BIOSYNTHETIC_PROCESS	GOBP_AMYLOID_PRECURSOR_PROTEIN_BIOSYNTHETIC_PROCESS	24	0.910127	1.60659	0.02	1	1	602	tags=12%, list=1%, signal=12%	MIR644A/MIR31/MIR153-1
GOBP_NEGATIVE_REGULATION_OF_ACTIVATED_T_CELL_PROLIFERATION	GOBP_NEGATIVE_REGULATION_OF_ACTIVATED_T_CELL_PROLIFERATION	15	0.867935	1.35308	0.02	1	1	203	tags=7%, list=0%, signal=7%	MIR181C
GOBP_NEGATIVE_REGULATION_OF_CHOLESTEROL_EFFLUX	GOBP_NEGATIVE_REGULATION_OF_CHOLESTEROL_EFFLUX	15	0.904987	1.41084	0.02	1	1	499	tags=20%, list=1%, signal=20%	MIR33B/MIR128-1/MIR26A1
GOBP_NEGATIVE_REGULATION_OF_VASCULAR_ASSOCIATED_SMOOTH_MUSCLE_CELL_MIGRATION	GOBP_NEGATIVE_REGULATION_OF_VASCULAR_ASSOCIATED_SMOOTH_MUSCLE_CELL_MIGRATION	13	0.888379	1.39054	0.02	1	1	3778	tags=23%, list=7%, signal=22%	MIR638/MIR218-1/ADIPOQ
GOBP_REGULATION_OF_PROTEIN_K63_LINKED_UBIQUITINATION	GOBP_REGULATION_OF_PROTEIN_K63_LINKED_UBIQUITINATION	13	0.875037	1.36966	0.02	1	1	824	tags=8%, list=1%, signal=8%	MIR138-1
GOBP_PROTEIN_PEPTIDYL_PROLYL_ISOMERIZATION	GOBP_PROTEIN_PEPTIDYL_PROLYL_ISOMERIZATION	43	-0.746956	-1.47512	0.0208333	1	1	1509	tags=9%, list=3%, signal=9%	PPIAL4A/PPIAL4D/PPIAL4E/PPIAL4F
GOCC_CLATHRIN_COAT_OF_ENDOCYTIC_VESICLE	GOCC_CLATHRIN_COAT_OF_ENDOCYTIC_VESICLE	11	-0.948984	-1.39448	0.0212766	1	1	321	tags=18%, list=1%, signal=18%	AP2M1/SLC18A3
GOCC_CLATHRIN_VESICLE_COAT	GOCC_CLATHRIN_VESICLE_COAT	28	-0.857095	-1.5532	0.0212766	1	1	321	tags=14%, list=1%, signal=14%	CLTB/AP2M1/NCALD/SLC18A3
GOMF_ACTIVIN_RECEPTOR_BINDING	GOMF_ACTIVIN_RECEPTOR_BINDING	11	-0.924274	-1.35817	0.0212766	1	1	30	tags=18%, list=0%, signal=18%	TDGF1/CFC1
GOBP_NEGATIVE_REGULATION_OF_INTERLEUKIN_1_BETA_PRODUCTION	GOBP_NEGATIVE_REGULATION_OF_INTERLEUKIN_1_BETA_PRODUCTION	40	-0.783808	-1.5147	0.0217391	1	1	6524	tags=20%, list=12%, signal=18%	IGF1/MIR181A2/FFAR1/MIR27B/GHSR/CARD18/MIR877/MIR98
GOCC_AP_TYPE_MEMBRANE_COAT_ADAPTOR_COMPLEX	GOCC_AP_TYPE_MEMBRANE_COAT_ADAPTOR_COMPLEX	40	-0.78154	-1.51032	0.0217391	1	1	321	tags=5%, list=1%, signal=5%	AP3B2/SLC18A3
GOMF_CIS_TRANS_ISOMERASE_ACTIVITY	GOMF_CIS_TRANS_ISOMERASE_ACTIVITY	41	-0.753978	-1.45914	0.0217391	1	1	1509	tags=10%, list=3%, signal=10%	PPIAL4A/PPIAL4D/PPIAL4E/PPIAL4F
GOBP_ACTIVIN_RECEPTOR_SIGNALING_PATHWAY	GOBP_ACTIVIN_RECEPTOR_SIGNALING_PATHWAY	45	-0.714614	-1.40476	0.0222222	1	1	4717	tags=20%, list=8%, signal=18%	TDGF1/AMHR2/IGSF1/FST/HJV/DMRT1/FGF10/CER1/CFC1
GOBP_NEGATIVE_REGULATION_OF_PROTEIN_KINASE_B_SIGNALING	GOBP_NEGATIVE_REGULATION_OF_PROTEIN_KINASE_B_SIGNALING	54	-0.753848	-1.59356	0.0222222	1	1	233	tags=6%, list=0%, signal=6%	MIRLET7F1/MIR375/MIR34C
GOBP_POSITIVE_REGULATION_OF_STRIATED_MUSCLE_CELL_DIFFERENTIATION	GOBP_POSITIVE_REGULATION_OF_STRIATED_MUSCLE_CELL_DIFFERENTIATION	49	-0.694544	-1.43314	0.0222222	1	1	3256	tags=12%, list=6%, signal=12%	IGF1/MIR199A1/MYOD1/MYF6/MYF5/MIR208A
GOBP_PROGRAMMED_NECROTIC_CELL_DEATH	GOBP_PROGRAMMED_NECROTIC_CELL_DEATH	49	-0.694555	-1.43316	0.0222222	1	1	403	tags=6%, list=1%, signal=6%	NUPR1/FZD9/MIR107
GOBP_STRIATED_MUSCLE_ADAPTATION	GOBP_STRIATED_MUSCLE_ADAPTATION	49	-0.71062	-1.46631	0.0222222	1	1	3991	tags=22%, list=7%, signal=21%	CAMK2B/TRPC3/MIR199A1/MLIP/MYMK/MYOD1/MYH6/MYOC/MIR208A/MIR208B/MIR34C
GOCC_CLATHRIN_COAT	GOCC_CLATHRIN_COAT	45	-0.788717	-1.55043	0.0222222	1	1	321	tags=4%, list=1%, signal=4%	VPS33A/SLC18A3
GOBP_MODULATION_BY_SYMBIONT_OF_ENTRY_INTO_HOST	GOBP_MODULATION_BY_SYMBIONT_OF_ENTRY_INTO_HOST	48	-0.701524	-1.42602	0.0227273	1	1	3080	tags=6%, list=5%, signal=6%	KRT6A/IFNA2/TRIML1
HP_ABNORMAL_MITOCHONDRIA_IN_MUSCLE_TISSUE	HP_ABNORMAL_MITOCHONDRIA_IN_MUSCLE_TISSUE	46	-0.712303	-1.41143	0.0227273	1	1	313	tags=28%, list=1%, signal=28%	NDUFA1/MT-TH/NDUFA11/NDUFS6/NDUFAF4/NDUFS3/NDUFS4/NDUFAF5/MT-TL2/NDUFV2/MT-TF/MT-TS2/MT-TN
GOCC_GOLGI_ASSOCIATED_VESICLE_MEMBRANE	GOCC_GOLGI_ASSOCIATED_VESICLE_MEMBRANE	52	-0.796561	-1.64762	0.0232558	1	1	2305	tags=8%, list=4%, signal=7%	RHO/CNGA2/SPPL2C/SLC18A3
GOCC_VESICLE_COAT	GOCC_VESICLE_COAT	55	-0.764049	-1.60243	0.0232558	1	1	321	tags=13%, list=1%, signal=13%	PEF1/CLTB/AP2M1/NCALD/TMED7/SAR1B/SLC18A3
GOBP_REGULATION_OF_MUSCLE_HYPERTROPHY	GOBP_REGULATION_OF_MUSCLE_HYPERTROPHY	64	-0.731533	-1.5838	0.0238095	1	1	6740	tags=16%, list=12%, signal=14%	TRPC3/IGF1/MIR199A1/ADRA1A/MLIP/MYMK/MIR199B/GATA5/MIR208A/MIR34C
HP_EXTERNAL_OPHTHALMOPLEGIA	HP_EXTERNAL_OPHTHALMOPLEGIA	66	-0.726186	-1.58805	0.0243902	1	1	2847	tags=8%, list=5%, signal=7%	MT-TT/MT-TE/MYF6/MYF5/MT-TN
GOBP_DETECTION_OF_CHEMICAL_STIMULUS	GOBP_DETECTION_OF_CHEMICAL_STIMULUS	495	0.468978	1.20165	0.025	1	1	5560	tags=18%, list=10%, signal=16%	TAS2R38/OR4A47/OR8A1/OR5M11/OR8G3P/OR10H5/OR2T2/OR51Q1/OR9A2/OR6C70/OR52E6/OR13C6P/OR52B6/OR13C4/OR5A1/OR10A4/OR8B8/OR10T2/OR2G6/OR51I2/OR14K1/OR10A2/OR5AK2/OR7D4/OR52A5/OR2AK2/OR7A2P/OR14L1P/OR5H8/OR2L2/OR5M10/OR4C12/OR9G1/OR4X2/OR2W1/OR2L3/OR13C9/OR2T4/OR2T11/OR4F21/OR2Z1/OR10G8/OR1S2/OR5P2/OR51V1/OR51S1/OR11G2/OR5AU1/OR1M1/OR5K1/OR52E2/OR13C3/OR6C68/OR4N2/OR52E5/OR1N2/OR1Q1/OR51I1/OR56A3/OR3A3…
GOBP_INTERLEUKIN_1_BETA_PRODUCTION	GOBP_INTERLEUKIN_1_BETA_PRODUCTION	106	-0.559078	-1.37508	0.025	1	1	6524	tags=8%, list=12%, signal=8%	IGF1/MIR181A2/FFAR1/MIR27B/PYDC1/GHSR/CARD18/MIR877/MIR98
GOBP_MUSCLE_HYPERTROPHY	GOBP_MUSCLE_HYPERTROPHY	92	-0.619149	-1.47353	0.025	1	1	6740	tags=13%, list=12%, signal=12%	TRPC3/IGF1/MIR199A1/ADRA1A/MLIP/MYMK/MIR199B/GATA5/MYH6/MYOC/MIR208A/MIR34C
GOCC_GOLGI_ASSOCIATED_VESICLE	GOCC_GOLGI_ASSOCIATED_VESICLE	92	-0.694887	-1.65378	0.025	1	1	4746	tags=7%, list=8%, signal=6%	SLC2A4/RHO/CLRN1/CNGA2/SPPL2C/SLC18A3
GOCC_MEMBRANE_COAT	GOCC_MEMBRANE_COAT	92	-0.617743	-1.47019	0.025	1	1	321	tags=2%, list=1%, signal=2%	AP3B2/SLC18A3
GOMF_OLFACTORY_RECEPTOR_ACTIVITY	GOMF_OLFACTORY_RECEPTOR_ACTIVITY	417	0.481357	1.22003	0.025	1	1	5560	tags=20%, list=10%, signal=18%	OR4A47/OR8A1/OR5M11/OR8G3P/OR10H5/OR2T2/OR51Q1/OR9A2/OR6C70/OR52E6/OR13C6P/OR52B6/OR13C4/OR5A1/OR10A4/OR8B8/OR10T2/OR2G6/OR51I2/OR14K1/OR10A2/OR5AK2/OR7D4/OR52A5/OR2AK2/OR7A2P/OR14L1P/OR5H8/OR2L2/OR5M10/OR4C12/OR9G1/OR4X2/OR2W1/OR2L3/OR13C9/OR2T4/OR2T11/OR4F21/OR2Z1/OR10G8/OR1S2/OR5P2/OR51V1/OR51S1/OR11G2/OR5AU1/OR1M1/OR5K1/OR52E2/OR13C3/OR6C68/OR4N2/OR52E5/OR1N2/OR1Q1/OR51I1/OR56A3/OR3A3/OR5B21/…
GOBP_REGULATION_OF_MUSCLE_ADAPTATION	GOBP_REGULATION_OF_MUSCLE_ADAPTATION	90	-0.658785	-1.53784	0.025641	1	1	7263	tags=13%, list=13%, signal=12%	CAMK2B/TRPC3/IGF1/MIR199A1/ADRA1A/MLIP/MYMK/MIR199B/GATA5/MIR208A/MIR208B/MIR34C
HP_EXERCISE_INTOLERANCE	HP_EXERCISE_INTOLERANCE	91	-0.617393	-1.44982	0.025641	1	1	3014	tags=8%, list=5%, signal=7%	ACTC1/BVES/MYPN/MYH6/MT-TE/SLC18A3/MT-TN
GOBP_MUSCLE_ADAPTATION	GOBP_MUSCLE_ADAPTATION	111	-0.642872	-1.5531	0.0294118	1	1	6740	tags=14%, list=12%, signal=12%	CAMK2B/TRPC3/IGF1/MIR199A1/ADRA1A/MLIP/MYMK/MIR199B/GATA5/MYOD1/MYH6/MYOC/MIR208A/MIR208B/MIR34C
GOBP_NEGATIVE_REGULATION_OF_CELL_CYCLE_G1_S_PHASE_TRANSITION	GOBP_NEGATIVE_REGULATION_OF_CELL_CYCLE_G1_S_PHASE_TRANSITION	115	0.656363	1.51157	0.030303	1	1	3033	tags=3%, list=5%, signal=3%	MIR638/MIR26A1/MIR138-1/C10orf99
GOBP_MUSCLE_CELL_MIGRATION	GOBP_MUSCLE_CELL_MIGRATION	90	0.68761	1.5253	0.031746	1	1	3778	tags=6%, list=7%, signal=5%	MIR638/MIR26A1/MIR218-1/FGF9/ADIPOQ
GOBP_MULTICELLULAR_ORGANISMAL_SIGNALING	GOBP_MULTICELLULAR_ORGANISMAL_SIGNALING	201	-0.468353	-1.24701	0.0322581	1	1	11122	tags=31%, list=20%, signal=25%	KCNE4/KCNMB4/CACNA1C/CTNNA3/GJA5/HCN4/FXYD1/ISL1/SLC4A3/NPR1/KCNN2/SCN3B/SCN1B/SCN5A/SCN7A/SCN4B/KCNE2/CACNG6/FXYD6/HRC/GPER1/DMRT3/SCN4A/ATP1A2/CHRNA1/KCNA5/KCNE5/KCNJ4/ATP2B3/RYR1/MAG/SCN2B/KCND3/SLC8A2/SCN3A/CACNA1G/CASQ2/P2RX3/MIR328/KCNIP3/NTRK2/KCNK15/AVPR1A/CACNA2D3/CACNB4/TNR/DRD1/KCNH6/CACNG4/CACNA2D2/KCNIP1/NOS1/GRIK2/GHSR/KCNK3/KCNMB2/GPR88/KCNJ12/CACNG1/GLRA1/MTNR1B/CACNG2/MIR208A
GOCC_INTRINSIC_COMPONENT_OF_ENDOPLASMIC_RETICULUM_MEMBRANE	GOCC_INTRINSIC_COMPONENT_OF_ENDOPLASMIC_RETICULUM_MEMBRANE	163	-0.530328	-1.37514	0.0322581	1	1	17419	tags=46%, list=31%, signal=32%	CALR/SLC35B3/EMC2/HSPA5/SPCS1/RRBP1/DPM2/CANX/TEX261/EXT1/SLC35B1/EMC10/SARAF/HACD3/ERN1/ESYT1/HLA-A/HLA-DRB1/HLA-E/WFS1/SLC37A2/CD74/BNIP1/EMC3/HLA-DRB5/PIGK/TAPT1/HM13/BCAP31/SELENOS/HSD11B1/TRAM1/HLA-DQB1/SLC27A2/HLA-B/HLA-DRA/TAP1/HLA-C/RHBDD2/HLA-DPA1/CLN3/DOLPP1/ELOVL1/ZMPSTE24/CPT1C/SPPL3/HLA-DPB1/TAP2/ANKLE2/ACER3/HLA-F/SLC27A5/ESYT3/PORCN/ELOVL4/FICD/RTN1/DCSTAMP/SLC37A4/HLA-H/UBXN8/ABCB…
GOCC_TRANSPORT_VESICLE_MEMBRANE	GOCC_TRANSPORT_VESICLE_MEMBRANE	203	-0.544303	-1.45869	0.0322581	1	1	8333	tags=17%, list=15%, signal=14%	SYNDIG1/SLC18A2/HLA-G/HLA-DQB2/OTOF/ATP6V1B1/LAMP5/HLA-DQA2/SYT10/SYN1/SLC30A8/SYN2/SV2C/AMPH/BSN/SYT9/SYPL2/AQP2/UNC13A/SYNPR/SYT3/SYP/SYT5/SCG3/OPRD1/RAB3C/SLC6A17/PTPRN/SVOP/SLC18A1/SYCN/SLC17A6/SYT4/SLC18A3
HP_INCREASED_SERUM_LACTATE	HP_INCREASED_SERUM_LACTATE	183	-0.47741	-1.2625	0.0322581	1	1	17667	tags=48%, list=31%, signal=33%	NDUFAF1/TRMT10C/SDHA/SOD1/COX6B1/NDUFS8/DNM1L/GOT2/TANGO2/PET117/FBXL4/MDH2/MT-ND6/MT-CO1/MRPL12/NDUFS2/NDUFB9/TXN2/COQ9/MRPS28/DLD/PDSS2/NAXE/COQ4/MTO1/GFM1/SURF1/HSD17B10/LYRM7/NDUFV1/YARS2/UQCRB/ECHS1/MPC1/COQ2/NDUFS7/PDHA1/C12orf65/RARS2/NDUFAF6/MICOS13/SLC25A42/MRPS22/LIPT2/NDUFA2/OGDH/RARS1/ATAD3A/HMGCL/SLC25A3/ISCA1/UQCRQ/GFM2/CHCHD10/MECP2/NDUFA1/NDUFB8/MT-TH/NDUFA13/FARS2/TMEM70/PET100/N…
GOBP_CHOLESTEROL_EFFLUX	GOBP_CHOLESTEROL_EFFLUX	61	0.681736	1.42925	0.0327869	1	1	499	tags=5%, list=1%, signal=5%	MIR33B/MIR128-1/MIR26A1
GOBP_REGULATION_OF_STEROL_TRANSPORT	GOBP_REGULATION_OF_STEROL_TRANSPORT	66	0.671218	1.41983	0.0327869	1	1	499	tags=5%, list=1%, signal=5%	MIR33B/MIR128-1/MIR26A1
GOBP_INSULIN_SECRETION	GOBP_INSULIN_SECRETION	207	-0.453509	-1.21428	0.0333333	1	1	12658	tags=27%, list=22%, signal=21%	ANO1/HNF1A/TCF7L2/KCNG2/SYTL4/FOXA2/SLC25A4/PSMD9/GIP/CPLX1/FAM3B/NR1H4/SFRP1/CACNA1C/SLC2A2/ISL1/ADCY5/NR0B2/CCN3/PTPRN2/CACNA1A/RAPGEF4/GPR27/MYRIP/GPER1/CFTR/UCN3/KCNA5/SIRT4/RBP4/GPLD1/PRKN/IL1RN/SLC30A8/ADCY8/VGF/SYT9/GCK/FFAR1/NKX6-1/CACNA2D2/MAFA/CRH/GLP1R/GHSR/CHGA/NEUROD1/ADCYAP1/ABCC8/PTPRN/TFAP2B/MTNR1B/GPR119/G6PC2/CELA2A/GCG
HP_LEUKOENCEPHALOPATHY	HP_LEUKOENCEPHALOPATHY	205	-0.4837	-1.2902	0.0333333	1	1	4155	tags=6%, list=7%, signal=6%	GJC2/EEF1A2/KIF5A/MYT1L/LMX1B/CAMK2B/HEPACAM/LAMA1/CDH15/TRPM3/CACNG2/KIF1A/MT-TN
HP_PECTUS_EXCAVATUM	HP_PECTUS_EXCAVATUM	253	-0.449036	-1.2231	0.0333333	1	1	3343	tags=3%, list=6%, signal=3%	RET/NOG/MYPN/COL2A1/MYOD1/TBX5/MYF5/SRY
GOBP_REGULATION_OF_TRANSLATIONAL_INITIATION	GOBP_REGULATION_OF_TRANSLATIONAL_INITIATION	80	0.67114	1.45962	0.0338983	1	1	6610	tags=5%, list=12%, signal=4%	DAZ1/DAZ2/BOLL/DAZL
GOBP_ADENYLATE_CYCLASE_MODULATING_G_PROTEIN_COUPLED_RECEPTOR_SIGNALING_PATHWAY	GOBP_ADENYLATE_CYCLASE_MODULATING_G_PROTEIN_COUPLED_RECEPTOR_SIGNALING_PATHWAY	229	-0.449197	-1.21422	0.0344828	1	1	5440	tags=24%, list=10%, signal=22%	VIP/ADGRG5/OXER1/GALR2/HTR1D/NPR3/ADGRL1/PTH1R/GPER1/ABCA1/ADRA1B/ADORA2A/ADRB2/RIT2/SSTR2/UCN3/ADCY1/PTHLH/CALCA/ADGRB3/ADCY8/HTR1F/GHRHR/ADRA1A/DRD1/GRM6/HTR1A/GNAO1/LPAR3/GALR3/ADGRL3/MCHR1/GLP1R/NPY2R/IAPP/LGR5/CHGA/GALR1/ADGRF1/OPRD1/MC5R/GRM3/GRIK3/PSAPL1/ADCYAP1/ADCYAP1R1/ADCY2/MC2R/GPR119/GPR6/GCG/HTR1E/GNAT3/MC3R/GHRH
GOBP_CELL_FATE_COMMITMENT	GOBP_CELL_FATE_COMMITMENT	249	-0.499655	-1.34902	0.0344828	1	1	4314	tags=11%, list=8%, signal=10%	FEV/DBX1/FEZF2/HES5/HOXD10/NKX6-3/ERBB4/ARX/TLX3/NKX2-1/GATA5/MYOD1/NEUROD1/WNT7A/NKX2-2/DMRTA2/FGF10/BARHL2/TBX5/MYF6/LHX3/NKX6-2/LBX1/NEUROG1/MYF5/MIR208A/SOX1
GOBP_GLUCOSE_METABOLIC_PROCESS	GOBP_GLUCOSE_METABOLIC_PROCESS	210	-0.452351	-1.22157	0.0344828	1	1	13156	tags=23%, list=23%, signal=18%	SLC39A14/INSR/MLYCD/LEP/PPP1R3B/SESN2/FBP1/PGM1/ACTN3/PPP1R3F/FOXA2/GPT/SLC37A4/GCGR/SLC25A10/C1QTNF3/RORA/GPD1/ESRRB/G6PC/RGN/ACACB/BRS3/DGAT2/PKLR/ALDOB/PPARGC1A/ENPP1/LEPR/GNMT/SDS/RBP4/GPLD1/FBP2/PPP1R3G/APOD/PRKN/IGF1/PFKFB1/PPP1R3A/GCK/SIK1/TFAP2B/INS/G6PC2/GCG/NKX1-1/MIR107
GOBP_MICROGLIAL_CELL_ACTIVATION	GOBP_MICROGLIAL_CELL_ACTIVATION	46	0.722565	1.49086	0.0344828	1	1	310	tags=4%, list=1%, signal=4%	MIR181C/MIR128-1
GOBP_NEUROTRANSMITTER_TRANSPORT	GOBP_NEUROTRANSMITTER_TRANSPORT	208	-0.458145	-1.22977	0.0344828	1	1	9478	tags=23%, list=17%, signal=19%	SYT6/ERC2/SYT2/GPM6B/PPFIA2/GPER1/RIMS3/ATP1A2/APBA1/ADORA2A/NRXN2/SLC1A7/SLC18A2/SLC22A1/ADCY1/OTOF/SNCG/HTR2A/CPLX4/SYN1/PRKN/SYN2/SLC6A1/SV2C/SLC6A12/SYT9/ADRA1A/DRD1/CPLX2/UNC13A/SLC6A4/NRXN1/SLC1A6/SLC6A3/SYP/NOS1/SLC6A15/SYT5/RIMS4/WNT7A/SLC6A17/SLC6A2/CHAT/SLC18A1/SLC17A6/SYT4/SLC18A3
GOBP_REGULATION_OF_PEPTIDE_HORMONE_SECRETION	GOBP_REGULATION_OF_PEPTIDE_HORMONE_SECRETION	209	-0.473097	-1.27837	0.0344828	1	1	10999	tags=22%, list=19%, signal=17%	SFRP1/CACNA1C/RASL10B/SLC2A2/ISL1/ADCY5/NR0B2/PAX8/CCN3/CACNA1A/RAPGEF4/GPR27/MYRIP/GPER1/CFTR/GRP/UCN3/KCNA5/TNFSF11/SIRT4/RBP4/GPLD1/PRKN/SLC30A8/ADCY8/GHRHR/SYT9/GCK/FFAR1/NKX6-1/CACNA2D2/CRH/GLP1R/GHSR/CHGA/NEUROD1/ADCYAP1/ABCC8/TFAP2B/MTNR1B/INS/G6PC2/CELA2A/GCG/GHRH
GOBP_ACTIVATED_T_CELL_PROLIFERATION	GOBP_ACTIVATED_T_CELL_PROLIFERATION	45	0.739998	1.5081	0.0350877	1	1	686	tags=4%, list=1%, signal=4%	MIR181C/MIR30B
GOBP_SNRNA_METABOLIC_PROCESS	GOBP_SNRNA_METABOLIC_PROCESS	47	0.724269	1.48059	0.0350877	1	1	1171	tags=2%, list=2%, signal=2%	CT45A10
GOBP_PEPTIDE_HORMONE_SECRETION	GOBP_PEPTIDE_HORMONE_SECRETION	247	-0.475801	-1.27961	0.0357143	1	1	10999	tags=21%, list=19%, signal=17%	SFRP1/CACNA1C/RASL10B/SLC2A2/ISL1/ADCY5/NR0B2/PAX8/CCN3/PTPRN2/VIP/CACNA1A/RAPGEF4/GPR27/MYRIP/GPER1/CFTR/GRP/UCN3/KCNA5/TNFSF11/SIRT4/RBP4/GPLD1/PRKN/IL1RN/SLC30A8/ADCY8/EDN3/VGF/GHRHR/SYT9/GCK/FFAR1/NKX6-1/CACNA2D2/MAFA/CRH/GLP1R/GHSR/CHGA/NEUROD1/ADCYAP1/ABCC8/PTPRN/TFAP2B/MTNR1B/GPR119/INS/G6PC2/CELA2A/GCG/GHRH
GOBP_PROTEIN_FOLDING	GOBP_PROTEIN_FOLDING	231	-0.47172	-1.2786	0.0357143	1	1	5029	tags=4%, list=9%, signal=4%	PPIAL4D/GNAO1/PDILT/HSP90AA4P/NPPB/UMOD/GNAT3/PPIAL4E/PPIAL4F
GOBP_REGULATION_OF_CHOLESTEROL_EFFLUX	GOBP_REGULATION_OF_CHOLESTEROL_EFFLUX	41	0.786687	1.55331	0.0357143	1	1	499	tags=7%, list=1%, signal=7%	MIR33B/MIR128-1/MIR26A1
HP_HETEROTROPIA	HP_HETEROTROPIA	186	-0.470558	-1.23179	0.0357143	1	1	4287	tags=10%, list=8%, signal=9%	CACNA1A/NDN/SYT2/SOX5/OCA2/MEG3/MAGEL2/PWRN1/HOXB1/UNC80/SLC38A8/ATOH7/DPP6/SOST/NPAP1/MYOD1/CHAT/MYF5/SLC18A3
GOBP_NEGATIVE_REGULATION_OF_SMOOTH_MUSCLE_CELL_MIGRATION	GOBP_NEGATIVE_REGULATION_OF_SMOOTH_MUSCLE_CELL_MIGRATION	28	0.812148	1.47381	0.0363636	1	1	3778	tags=11%, list=7%, signal=10%	MIR638/MIR218-1/ADIPOQ
GOMF_MRNA_BINDING	GOMF_MRNA_BINDING	485	0.46793	1.19676	0.037037	1	1	3170	tags=5%, list=6%, signal=5%	MIR4686/MIR644A/MIR548C/MIR582/MIR1207/MIR181C/MIR30C1/MIR638/MIRLET7G/MIR128-1/MIR5588/MIR31/MIR1224/MIR26A1/MIR153-1/MIR30B/MIR218-1/MIR409/MIR138-1/DAZ1/DAZ2/ZAR1/MIR10B
GOBP_NEGATIVE_REGULATION_OF_STEROL_TRANSPORT	GOBP_NEGATIVE_REGULATION_OF_STEROL_TRANSPORT	23	0.828083	1.49242	0.0377358	1	1	499	tags=13%, list=1%, signal=13%	MIR33B/MIR128-1/MIR26A1
GOBP_MYELIN_MAINTENANCE	GOBP_MYELIN_MAINTENANCE	17	0.84546	1.38053	0.0384615	1	1	499	tags=6%, list=1%, signal=6%	MIR26A1
GOBP_NEGATIVE_REGULATION_OF_ALCOHOL_BIOSYNTHETIC_PROCESS	GOBP_NEGATIVE_REGULATION_OF_ALCOHOL_BIOSYNTHETIC_PROCESS	16	0.83952	1.33785	0.0392157	1	1	266	tags=6%, list=0%, signal=6%	MIR30C1
GOBP_NEGATIVE_REGULATION_OF_EXTRACELLULAR_MATRIX_ORGANIZATION	GOBP_NEGATIVE_REGULATION_OF_EXTRACELLULAR_MATRIX_ORGANIZATION	12	-0.913916	-1.39124	0.0392157	1	1	44	tags=17%, list=0%, signal=17%	CHADL/MIR98
GOBP_NEGATIVE_REGULATION_OF_LONG_TERM_SYNAPTIC_POTENTIATION	GOBP_NEGATIVE_REGULATION_OF_LONG_TERM_SYNAPTIC_POTENTIATION	12	0.849435	1.29269	0.0392157	1	1	686	tags=8%, list=1%, signal=8%	MIR30B
GOBP_NEGATIVE_REGULATION_OF_OSTEOBLAST_PROLIFERATION	GOBP_NEGATIVE_REGULATION_OF_OSTEOBLAST_PROLIFERATION	12	0.849188	1.29231	0.0392157	1	1	3483	tags=17%, list=6%, signal=16%	MIR138-1/NELL1
GOBP_SEQUESTERING_OF_METAL_ION	GOBP_SEQUESTERING_OF_METAL_ION	16	0.833149	1.3277	0.0392157	1	1	2500	tags=12%, list=4%, signal=12%	FTHL17/FTMT
GOCC_MISMATCH_REPAIR_COMPLEX	GOCC_MISMATCH_REPAIR_COMPLEX	12	0.866547	1.31873	0.0392157	1	1	1261	tags=8%, list=2%, signal=8%	PMS2P11
HP_DYSCALCULIA	HP_DYSCALCULIA	22	-0.858015	-1.49669	0.0392157	1	1	411	tags=9%, list=1%, signal=9%	CACNA1A/SRY
GOBP_KERATINIZATION	GOBP_KERATINIZATION	222	0.549325	1.34793	0.04	1	1	7535	tags=26%, list=13%, signal=22%	LCE2A/KRTAP1-4/KRTAP9-7/SPRR4/KRTAP10-1/KRTAP17-1/KRTAP5-3/KRTAP8-1/KRTAP12-1/KRTAP10-10/LCE2D/KRT35/KRTAP13-2/KRTAP4-2/KRTAP11-1/KRTAP4-3/KRTAP10-9/KRTAP10-7/KRTAP1-3/KRT26/LCE1F/KRT74/KRTAP9-1/KRTAP3-3/SPRR2D/RPTN/KRT31/LCE4A/KRTAP4-1/KRTAP10-6/KRTAP1-5/DSG4/KRT33A/KRTAP5-4/KRTAP4-6/KRT28/KRTAP3-2/SPRR2F/TGM5/DSG3/KRT2/KRT73/LIPN/KRT33B/SPINK6/SPRR2E/TGM1/KRT20/KRTAP5-8/KRT72/KRTAP5-9/KRT40/KRT…
GOMF_UBIQUITIN_LIKE_PROTEIN_LIGASE_ACTIVITY	GOMF_UBIQUITIN_LIKE_PROTEIN_LIGASE_ACTIVITY	305	-0.594556	-1.61605	0.04	1	1	2806	tags=5%, list=5%, signal=4%	ZSWIM2/SIAH3/TRIM71/TRIM49C/TRIM49B/TRIM43/TRIM64B/TRIM64C/TRIML1/BIRC8/TRIM51/TRIM48/TRIM49/TRIM43B
HP_INTELLECTUAL_DISABILITY_MILD	HP_INTELLECTUAL_DISABILITY_MILD	350	-0.449118	-1.24207	0.04	1	1	9656	tags=11%, list=17%, signal=9%	GATA4/NDN/ZNF462/EEF1A2/SARDH/NGF/FMN2/TAC3/OCA2/PCDH19/MEG3/MYT1L/MAGEL2/RYR1/DOCK3/MASP1/CAMK2B/HEPACAM/NTRK1/IGF1/SOX11/ALX4/GRIK2/PLP1/ARX/NKX2-1/L1CAM/CDH15/TRPM3/DCC/TFAP2B/ACTL6B/CACNG2/KIF1A/FRRS1L/SRY/MT-TN
GOBP_POSITIVE_REGULATION_OF_G1_S_TRANSITION_OF_MITOTIC_CELL_CYCLE	GOBP_POSITIVE_REGULATION_OF_G1_S_TRANSITION_OF_MITOTIC_CELL_CYCLE	43	-0.691629	-1.36586	0.0416667	1	1	2534	tags=9%, list=4%, signal=9%	KCNA5/CCND2/FGF10/MIR208A
GOBP_POSITIVE_REGULATION_OF_VASCULATURE_DEVELOPMENT	GOBP_POSITIVE_REGULATION_OF_VASCULATURE_DEVELOPMENT	166	0.560081	1.29953	0.0416667	1	1	686	tags=2%, list=1%, signal=2%	MIRLET7G/MIR31/MIR1224/MIR30B
GOCC_TRANSPORT_VESICLE	GOCC_TRANSPORT_VESICLE	399	-0.444699	-1.24236	0.0416667	1	1	8333	tags=12%, list=15%, signal=10%	SYNDIG1/SLC18A2/GALNT15/HLA-G/HLA-DQB2/OTOF/ATP6V1B1/RAB40AL/LAMP5/KCNK9/HLA-DQA2/SYT10/SYN1/SLC30A8/SYN2/IGF1/SV2C/AMPH/VGF/SLC2A4/BSN/SYT9/SYPL2/AQP2/UNC13A/CLRN1/SYNPR/MT3/SYT3/SNAP91/SYP/SYT5/CHGA/SCG3/OPRD1/RAB3C/SLC6A17/PTPRN/SVOP/PCSK2/SLC18A1/INS/KIF1A/SYCN/SLC17A6/SYT4/SLC18A3
GOBP_NECROPTOTIC_PROCESS	GOBP_NECROPTOTIC_PROCESS	41	-0.729218	-1.41122	0.0434783	1	1	403	tags=5%, list=1%, signal=5%	FZD9/MIR107
GOBP_NEGATIVE_REGULATION_OF_INTERLEUKIN_8_PRODUCTION	GOBP_NEGATIVE_REGULATION_OF_INTERLEUKIN_8_PRODUCTION	36	-0.729302	-1.38773	0.0434783	1	1	5914	tags=17%, list=10%, signal=15%	MIR106B/MIR181A2/ELANE/BPI/MIRLET7C/MIR98
GOBP_POSITIVE_REGULATION_OF_GLUCOSE_METABOLIC_PROCESS	GOBP_POSITIVE_REGULATION_OF_GLUCOSE_METABOLIC_PROCESS	41	-0.696402	-1.34772	0.0434783	1	1	7368	tags=17%, list=13%, signal=15%	GPLD1/PPP1R3G/IGF1/GCK/INS/GCG/MIR107
GOBP_REGULATION_OF_NECROTIC_CELL_DEATH	GOBP_REGULATION_OF_NECROTIC_CELL_DEATH	37	-0.70969	-1.35528	0.0434783	1	1	5802	tags=11%, list=10%, signal=10%	NUPR1/FZD9/MT3/MIR107
GOMF_UBIQUITIN_LIKE_PROTEIN_TRANSFERASE_ACTIVITY	GOMF_UBIQUITIN_LIKE_PROTEIN_TRANSFERASE_ACTIVITY	452	-0.510137	-1.43077	0.0434783	1	1	2806	tags=3%, list=5%, signal=3%	ZSWIM2/UBE2NL/SIAH3/TRIM71/TRIM49C/TRIM49B/TRIM43/TRIM64B/TRIM64C/TRIML1/BIRC8/TRIM51/TRIM48/TRIM49/TRIM43B
HP_BRISK_REFLEXES	HP_BRISK_REFLEXES	41	-0.721485	-1.39626	0.0434783	1	1	313	tags=5%, list=1%, signal=5%	REEP1/MT-TN
HP_HYPERINTENSITY_OF_CEREBRAL_WHITE_MATTER_ON_MRI	HP_HYPERINTENSITY_OF_CEREBRAL_WHITE_MATTER_ON_MRI	36	-0.736311	-1.40107	0.0434783	1	1	3696	tags=11%, list=7%, signal=10%	CACNA1G/PLP1/ACTL6B/NKX6-2
HP_PROGRESSIVE_EXTERNAL_OPHTHALMOPLEGIA	HP_PROGRESSIVE_EXTERNAL_OPHTHALMOPLEGIA	36	-0.694714	-1.32191	0.0434783	1	1	313	tags=6%, list=1%, signal=6%	MT-TT/MT-TN
HP_GLYCOSURIA	HP_GLYCOSURIA	39	-0.726115	-1.39154	0.0444444	1	1	6199	tags=21%, list=11%, signal=18%	GYS2/GCK/SLC16A12/NEUROD1/ABCC8/PAX4/INS/MT-TN
GOBP_POSITIVE_REGULATION_OF_MUSCLE_CELL_DIFFERENTIATION	GOBP_POSITIVE_REGULATION_OF_MUSCLE_CELL_DIFFERENTIATION	81	-0.635083	-1.4711	0.0465116	1	1	3599	tags=10%, list=6%, signal=9%	IGF1/MIR199A1/CTNNA2/MYOD1/CDH15/MYF6/MYF5/MIR208A
GOBP_POSITIVE_REGULATION_OF_PEPTIDE_HORMONE_SECRETION	GOBP_POSITIVE_REGULATION_OF_PEPTIDE_HORMONE_SECRETION	95	-0.573923	-1.39426	0.0465116	1	1	9408	tags=21%, list=17%, signal=18%	GPR27/MYRIP/GPER1/CFTR/GRP/UCN3/TNFSF11/RBP4/GPLD1/SLC30A8/ADCY8/GHRHR/GCK/FFAR1/NKX6-1/CRH/ADCYAP1/INS/GCG/GHRH
GOBP_NEGATIVE_REGULATION_OF_PROTEIN_MODIFICATION_BY_SMALL_PROTEIN_CONJUGATION_OR_REMOVAL	GOBP_NEGATIVE_REGULATION_OF_PROTEIN_MODIFICATION_BY_SMALL_PROTEIN_CONJUGATION_OR_REMOVAL	91	0.619637	1.3748	0.047619	1	1	3801	tags=3%, list=7%, signal=3%	MIR138-1/FSCB/MAGEA2
GOBP_PEPTIDYL_PROLINE_MODIFICATION	GOBP_PEPTIDYL_PROLINE_MODIFICATION	59	-0.706165	-1.49232	0.047619	1	1	1509	tags=7%, list=3%, signal=7%	PPIAL4A/PPIAL4D/PPIAL4E/PPIAL4F
GOBP_CELLULAR_RESPONSE_TO_VIRUS	GOBP_CELLULAR_RESPONSE_TO_VIRUS	66	0.661542	1.39936	0.0491803	1	1	7874	tags=9%, list=14%, signal=8%	MIR30C1/MIR130A/IL6/PENK/USP17L2/IL12A
GOBP_REGULATION_OF_PLASMA_LIPOPROTEIN_PARTICLE_LEVELS	GOBP_REGULATION_OF_PLASMA_LIPOPROTEIN_PARTICLE_LEVELS	97	0.580569	1.30532	0.0491803	1	1	6707	tags=8%, list=12%, signal=7%	MIR33B/MIR128-1/PRKACG/IL19/ADIPOQ/MIR33A/CUBN/SOAT2
COAD
ID	Description	setSize	enrichmentScore	NES	pvalue	p.adjust	qvalues	rank	leading_edge	core_enrichment
GOBP_REGULATION_OF_BICELLULAR_TIGHT_JUNCTION_ASSEMBLY	GOBP_REGULATION_OF_BICELLULAR_TIGHT_JUNCTION_ASSEMBLY	25	-0.850167	-1.59924	0.0103093	1	1	711	tags=24%, list=1%, signal=24%	RUNX1/GJA1/GPBAR1/CLDN5/SNAI2/MIR105-1
GOBP_REGULATION_OF_PROTEIN_LOCALIZATION_TO_CELL_SURFACE	GOBP_REGULATION_OF_PROTEIN_LOCALIZATION_TO_CELL_SURFACE	40	-0.79332	-1.5393	0.0103093	1	1	789	tags=12%, list=1%, signal=12%	ACTN2/CAV3/ERBB4/MIR520E/MIR520B
GOBP_POSITIVE_REGULATION_OF_GLYCOPROTEIN_METABOLIC_PROCESS	GOBP_POSITIVE_REGULATION_OF_GLYCOPROTEIN_METABOLIC_PROCESS	27	-0.808684	-1.53096	0.0104167	1	1	551	tags=7%, list=1%, signal=7%	IGF1/MIR346
GOBP_POSITIVE_REGULATION_OF_HUMORAL_IMMUNE_RESPONSE	GOBP_POSITIVE_REGULATION_OF_HUMORAL_IMMUNE_RESPONSE	22	-0.78904	-1.45974	0.0105263	1	1	4732	tags=14%, list=8%, signal=12%	ZP4/MIR520E/MIR520B
GOMF_MRNA_5_UTR_BINDING	GOMF_MRNA_5_UTR_BINDING	26	-0.836644	-1.57208	0.0105263	1	1	551	tags=19%, list=1%, signal=19%	IGF2BP3/IGF2BP1/MYH10/LARP6/MIR346
GOBP_POSITIVE_REGULATION_OF_PROTEIN_LOCALIZATION_TO_CELL_SURFACE	GOBP_POSITIVE_REGULATION_OF_PROTEIN_LOCALIZATION_TO_CELL_SURFACE	18	-0.890133	-1.64483	0.0108696	1	1	789	tags=17%, list=1%, signal=16%	ERBB4/MIR520E/MIR520B
GOBP_PROTEIN_LOCALIZATION_TO_CELL_SURFACE	GOBP_PROTEIN_LOCALIZATION_TO_CELL_SURFACE	67	-0.659498	-1.33221	0.019802	1	1	789	tags=16%, list=1%, signal=16%	FCN1/ANK2/FGF7/GPIHBP1/FGF10/RIC3/ACTN2/CAV3/ERBB4/MIR520E/MIR520B
GOBP_NEGATIVE_REGULATION_OF_INTERLEUKIN_8_PRODUCTION	GOBP_NEGATIVE_REGULATION_OF_INTERLEUKIN_8_PRODUCTION	36	-0.685544	-1.3207	0.03125	1	1	983	tags=19%, list=2%, signal=19%	MIR181A2/MIR302D/MIR920/MIR100/MIR520C/MIR129-1/MIR520B
GOBP_VASCULAR_ENDOTHELIAL_CELL_PROLIFERATION	GOBP_VASCULAR_ENDOTHELIAL_CELL_PROLIFERATION	38	-0.706816	-1.36163	0.03125	1	1	6016	tags=21%, list=11%, signal=19%	MIR30E/MIR15B/MIR329-1/MIR130A/MIR487B/MIR133B/MIR495/MIR129-1
GOBP_NEGATIVE_REGULATION_OF_SPROUTING_ANGIOGENESIS	GOBP_NEGATIVE_REGULATION_OF_SPROUTING_ANGIOGENESIS	22	-0.759506	-1.4051	0.0315789	1	1	9112	tags=32%, list=16%, signal=27%	MIR138-1/MIR34C/MIR30E/MIR329-1/MIR487B/MIR495/MIR377
GOBP_REGULATION_OF_SKELETAL_MUSCLE_ADAPTATION	GOBP_REGULATION_OF_SKELETAL_MUSCLE_ADAPTATION	14	-0.81586	-1.46715	0.0322581	1	1	362	tags=29%, list=1%, signal=28%	MYMK/CAMK2B/MIR499A/MIR208B
GOBP_COMPLEMENT_ACTIVATION_ALTERNATIVE_PATHWAY	GOBP_COMPLEMENT_ACTIVATION_ALTERNATIVE_PATHWAY	18	-0.774161	-1.43053	0.0326087	1	1	2362	tags=22%, list=4%, signal=21%	C8A/CFHR5/MIR520E/MIR520B
GOBP_NEGATIVE_REGULATION_OF_ENDOTHELIAL_CELL_DIFFERENTIATION	GOBP_NEGATIVE_REGULATION_OF_ENDOTHELIAL_CELL_DIFFERENTIATION	10	-0.861576	-1.47669	0.0326087	1	1	339	tags=20%, list=1%, signal=20%	ZEB1/MIR495
GOBP_RESPONSE_TO_TYPE_I_INTERFERON	GOBP_RESPONSE_TO_TYPE_I_INTERFERON	100	-0.621812	-1.25072	0.04	1	1	4507	tags=8%, list=8%, signal=7%	IFNA13/IFNA6/IFNA16/IFNA7/IFNA2/IFNA8/IFNA10/IFNA17
GOMF_RNA_POLYMERASE_CORE_ENZYME_BINDING	GOMF_RNA_POLYMERASE_CORE_ENZYME_BINDING	56	-0.662718	-1.31351	0.04	1	1	1634	tags=5%, list=3%, signal=5%	MIR584/MIR16-1/MIR297
GOBP_RESPONSE_TO_DSRNA	GOBP_RESPONSE_TO_DSRNA	54	-0.661915	-1.30927	0.040404	1	1	4507	tags=17%, list=8%, signal=15%	IFNA13/IFNA6/IFNK/IFNA16/IFNA7/IFNA2/IFNA8/IFNA10/IFNA17
GOBP_NATURAL_KILLER_CELL_ACTIVATION_INVOLVED_IN_IMMUNE_RESPONSE	GOBP_NATURAL_KILLER_CELL_ACTIVATION_INVOLVED_IN_IMMUNE_RESPONSE	31	-0.6947	-1.31556	0.0412371	1	1	4507	tags=29%, list=8%, signal=27%	IFNA13/IFNA6/IFNK/IFNA16/IFNA7/IFNA2/IFNA8/IFNA10/IFNA17
GOBP_SERINE_PHOSPHORYLATION_OF_STAT_PROTEIN	GOBP_SERINE_PHOSPHORYLATION_OF_STAT_PROTEIN	27	-0.703402	-1.33164	0.0416667	1	1	4507	tags=33%, list=8%, signal=31%	IFNA13/IFNA6/IFNK/IFNA16/IFNA7/IFNA2/IFNA8/IFNA10/IFNA17
GOBP_NEGATIVE_REGULATION_OF_PHOSPHATIDYLINOSITOL_3_KINASE_SIGNALING	GOBP_NEGATIVE_REGULATION_OF_PHOSPHATIDYLINOSITOL_3_KINASE_SIGNALING	15	-0.808135	-1.45309	0.0434783	1	1	466	tags=13%, list=1%, signal=13%	CRYBA1/MIR449A
GOMF_RNA_BINDING_INVOLVED_IN_POSTTRANSCRIPTIONAL_GENE_SILENCING	GOMF_RNA_BINDING_INVOLVED_IN_POSTTRANSCRIPTIONAL_GENE_SILENCING	192	-0.576594	-1.17417	0.049505	1	1	9348	tags=33%, list=17%, signal=28%	MIR552/MIR150/MIR640/MIR138-1/MIR153-1/MIR181A2/MIR302D/MIR3909/MIR32/MIR548P/MIR1207/MIR128-1/MIR548C/MIR193B/MIR218-1/MIR582/MIR505/MIR644A/MIRLET7F1/MIR149/MIR30E/MIR511/MIR920/MIR15B/MIR96/MIR365A/MIR125B1/MIR374A/MIR188/MIR409/MIR1298/MIR103A1/MIR28/MIR1277/MIR329-1/MIR199B/MIR494/MIR588/MIR130A/MIR154/MIR485/MIR217/MIR299/MIR362/MIR520H/MIR16-1/MIR487B/MIR100/MIR187/MIR767/MIR520E/MIR448/MI…
DLBC
ID	Description	setSize	enrichmentScore	NES	pvalue	p.adjust	qvalues	rank	leading_edge	core_enrichment
GOBP_DETECTION_OF_CHEMICAL_STIMULUS	GOBP_DETECTION_OF_CHEMICAL_STIMULUS	495	0.704877	1.26601	0.00990099	1	1	9756	tags=45%, list=17%, signal=38%	OR2A4/OR56A3/OR2G2/OR4D2/OR4K3/OR8U1/OR10G4/OR8H2/OR1E3/TAS2R39/OR2M7/OR10G3/OR1A1/OR10G7/OR4B1/OR4A5/OR5AU1/OR10H4/OR9G1/OR10G8/OR6K2/OR5M10/OR8J2/OR8D1/OR10J4/OR4E1/OR52A4P/OR2M3/OR4K5/OR5M9/OR51B6/OR10Z1/OR8H3/OR10G9/OR8H1/OR5T1/OR1C1/OR13C6P/OR4S2/OR13C9/OR1D5/OR4S1/OR5AP2/OR4C12/OR4C15/OR4C11/OR8J1/OR4A15/OR5AC2/OR2L5/OR5J2/OR8G2P/OR5D16/OR2T33/OR6C68/OR8K5/OR2AJ1/OR1L6/OR11H12/OR5K4/OR6C76/…
GOBP_NEGATIVE_REGULATION_OF_CELLULAR_AMIDE_METABOLIC_PROCESS	GOBP_NEGATIVE_REGULATION_OF_CELLULAR_AMIDE_METABOLIC_PROCESS	218	0.721525	1.30352	0.00990099	1	1	3349	tags=9%, list=6%, signal=8%	MIR125B1/MIR1-1/MIR208A/MIR107/MIR518B/MIR204/MIR520E/MIR182/MIR520B/MIR16-1/MIR31/MIR96/MIR103A1/MIR153-1/MIR218-1/MIR299/MIR9-1/MIR212/MIR877
GOBP_REGULATION_OF_TRANSLATION_NCRNA_MEDIATED	GOBP_REGULATION_OF_TRANSLATION_NCRNA_MEDIATED	74	0.846845	1.49844	0.00990099	1	1	3349	tags=26%, list=6%, signal=24%	MIR125B1/MIR1-1/MIR208A/MIR107/MIR518B/MIR346/MIR204/MIR520E/MIR182/MIR520B/MIR16-1/MIR31/MIR96/MIR103A1/MIR218-1/MIR299/MIR9-1/MIR212/MIR877
GOBP_REGULATION_OF_VASCULAR_ASSOCIATED_SMOOTH_MUSCLE_CELL_PROLIFERATION	GOBP_REGULATION_OF_VASCULAR_ASSOCIATED_SMOOTH_MUSCLE_CELL_PROLIFERATION	72	0.762397	1.34585	0.00990099	1	1	1797	tags=10%, list=3%, signal=9%	MIR301A/MIR1-1/MIR208A/MIR448/MIR182/MIR1298/MIR96
GOBP_SENSORY_PERCEPTION_OF_SMELL	GOBP_SENSORY_PERCEPTION_OF_SMELL	441	0.718774	1.28887	0.00990099	1	1	9756	tags=49%, list=17%, signal=41%	OR2A4/OR56A3/OR2G2/OR4D2/OR4K3/OR8U1/OR10G4/OR8H2/OR1E3/OR2M7/OR10G3/OR1A1/OR10G7/OR4B1/OR4A5/OR5AU1/OR10H4/OR9G1/OR10G8/OR6K2/OR5M10/OR8J2/OR8D1/OR10J4/OR4E1/OR52A4P/OR2M3/OR4K5/OR5M9/OR51B6/OR10Z1/OR8H3/OR10G9/OR8H1/OR5T1/OR1C1/OR13C6P/OR4S2/OR13C9/OR1D5/OR4S1/OR5AP2/OR4C12/OR4C15/OR4C11/OR8J1/OR4A15/OR5AC2/OR2L5/OR5J2/OR8G2P/OR5D16/OR2T33/OR6C68/OR8K5/OR2AJ1/OR1L6/OR11H12/OR5K4/OR6C76/OR4C13/O…
GOCC_INTERMEDIATE_FILAMENT	GOCC_INTERMEDIATE_FILAMENT	203	0.682841	1.22849	0.00990099	1	1	9709	tags=34%, list=17%, signal=28%	KRTAP23-1/KRTAP27-1/KRTAP13-1/KRTAP15-1/KRTAP3-3/KRTAP4-4/KRTAP9-1/KRTAP21-3/KRTAP6-2/KRTAP13-3/KRTAP10-11/KRTAP9-4/KRTAP4-5/KRTAP20-3/KRTAP12-2/KRTAP4-2/KRTAP5-5/KRTAP24-1/KRTAP19-4/KRTAP20-2/KRTAP9-9/KRTAP10-9/KRTAP4-8/KRTAP22-1/KRTAP19-2/KRTAP1-4/KRTAP4-9/KRTAP9-7/KRTAP10-8/KRTAP9-2/KRTAP1-1/KRTAP7-1/KRT33B/KRTAP10-4/KRTAP17-1/KRTAP13-2/KRT76/KRTAP10-7/KRTAP4-12/SHANK2/KRTAP10-1/KRTAP10-2/KRTA…
GOCC_INTERMEDIATE_FILAMENT_CYTOSKELETON	GOCC_INTERMEDIATE_FILAMENT_CYTOSKELETON	244	0.671268	1.20924	0.00990099	1	1	9709	tags=28%, list=17%, signal=24%	KRTAP23-1/KRTAP27-1/KRTAP13-1/KRTAP15-1/KRTAP3-3/KRTAP4-4/KRTAP9-1/KRTAP21-3/KRTAP6-2/KRTAP13-3/KRTAP10-11/KRTAP9-4/KRTAP4-5/KRTAP20-3/KRTAP12-2/KRTAP4-2/KRTAP5-5/KRTAP24-1/KRTAP19-4/KRTAP20-2/KRTAP9-9/KRTAP10-9/KRTAP4-8/KRTAP22-1/KRTAP19-2/KRTAP1-4/KRTAP4-9/KRTAP9-7/KRTAP10-8/KRTAP9-2/KRTAP1-1/KRTAP7-1/KRT33B/KRTAP10-4/KRTAP17-1/KRTAP13-2/KRT76/KRTAP10-7/KRTAP4-12/SHANK2/KRTAP10-1/KRTAP10-2/KRTA…
GOMF_BASAL_TRANSCRIPTION_MACHINERY_BINDING	GOMF_BASAL_TRANSCRIPTION_MACHINERY_BINDING	68	0.805628	1.42229	0.00990099	1	1	2894	tags=4%, list=5%, signal=4%	MIR1-1/MIR16-1/MIR584
GOMF_MRNA_BINDING	GOMF_MRNA_BINDING	485	0.678808	1.21996	0.00990099	1	1	3396	tags=12%, list=6%, signal=12%	MIR125B1/MIR301A/MIR1-1/MIR373/MIR2355/MIR128-1/MIR208A/MIR301B/MIR152/MIR588/MIR107/MIR518A1/MIR873/MIR518B/MIR520A/MIR511/MIR411/MIR505/MIR346/MIR204/MIR892B/MIR448/MIR876/MIRLET7C/MIR141/MIR520E/MIR182/MIR758/MIR520H/MIR410/MIR188/MIR767/MIR1298/MIR520B/MIR654/MIR16-1/MIR31/MIR30A/MIR4686/MIR208B/MIR96/MIR99A/MIR519E/MIR154/MIR103A1/MIR153-1/MIR449A/MIR495/MIR183/MIR218-1/MIR299/MIR217/MIR409/…
GOMF_ODORANT_BINDING	GOMF_ODORANT_BINDING	114	0.776313	1.38591	0.00990099	1	1	7665	tags=53%, list=14%, signal=46%	OR2A4/OR8U1/OR8H2/OR5AU1/OR6K2/OR5M10/OR8J2/OR8D1/OR10J4/OR4E1/OR5M9/OR10Z1/OR8H3/OR8H1/OR5AP2/OR8J1/OR5AC2/OR5J2/OR8G2P/OR5D16/OR8K5/OR5K4/OR14C36/OR12D3/OR5F1/OR8G1/OR6K6/OR8G5/OR5L2/OR14A16/OR5B3/OR5AK3P/OR5H15/OR5M8/OR5AR1/OR8B4/OR5H1/OR12D2/OR5G3/OR5AL1/OR10R2/OR8D4/OR5K3/OR8B8/OR12D1/OR10K1/GPR148/OR8A1/OR9I1/OR5D14/OR14J1/OR2A25/OR6K3/OR5H8/OR5AN1/OR10V1/OR13G1/OR5H2/OR14K1/OR5AK2
GOMF_OLFACTORY_RECEPTOR_ACTIVITY	GOMF_OLFACTORY_RECEPTOR_ACTIVITY	417	0.721964	1.29554	0.00990099	1	1	9756	tags=51%, list=17%, signal=43%	OR2A4/OR56A3/OR2G2/OR4D2/OR4K3/OR8U1/OR10G4/OR8H2/OR1E3/OR2M7/OR10G3/OR1A1/OR10G7/OR4B1/OR4A5/OR5AU1/OR10H4/OR9G1/OR10G8/OR6K2/OR5M10/OR8J2/OR8D1/OR10J4/OR4E1/OR52A4P/OR2M3/OR4K5/OR5M9/OR51B6/OR10Z1/OR8H3/OR10G9/OR8H1/OR5T1/OR1C1/OR13C6P/OR4S2/OR13C9/OR1D5/OR4S1/OR5AP2/OR4C12/OR4C15/OR4C11/OR8J1/OR4A15/OR5AC2/OR2L5/OR5J2/OR8G2P/OR5D16/OR2T33/OR6C68/OR8K5/OR2AJ1/OR1L6/OR11H12/OR5K4/OR6C76/OR4C13/O…
GOMF_RNA_BINDING_INVOLVED_IN_POSTTRANSCRIPTIONAL_GENE_SILENCING	GOMF_RNA_BINDING_INVOLVED_IN_POSTTRANSCRIPTIONAL_GENE_SILENCING	192	0.737466	1.32719	0.00990099	1	1	3396	tags=31%, list=6%, signal=29%	MIR125B1/MIR301A/MIR1-1/MIR373/MIR2355/MIR128-1/MIR208A/MIR301B/MIR152/MIR588/MIR107/MIR518A1/MIR873/MIR518B/MIR520A/MIR511/MIR411/MIR505/MIR204/MIR892B/MIR448/MIR876/MIRLET7C/MIR141/MIR520E/MIR182/MIR758/MIR520H/MIR410/MIR188/MIR767/MIR1298/MIR520B/MIR654/MIR16-1/MIR31/MIR30A/MIR4686/MIR208B/MIR96/MIR99A/MIR519E/MIR154/MIR103A1/MIR153-1/MIR449A/MIR495/MIR183/MIR218-1/MIR299/MIR217/MIR409/MIR9-1/…
GOMF_RNA_POLYMERASE_BINDING	GOMF_RNA_POLYMERASE_BINDING	72	0.785795	1.38715	0.00990099	1	1	2894	tags=4%, list=5%, signal=4%	MIR1-1/MIR16-1/MIR584
GOMF_RNA_POLYMERASE_CORE_ENZYME_BINDING	GOMF_RNA_POLYMERASE_CORE_ENZYME_BINDING	56	0.810559	1.41287	0.01	1	1	2894	tags=5%, list=5%, signal=5%	MIR1-1/MIR16-1/MIR584
GOBP_POSITIVE_REGULATION_OF_G1_S_TRANSITION_OF_MITOTIC_CELL_CYCLE	GOBP_POSITIVE_REGULATION_OF_G1_S_TRANSITION_OF_MITOTIC_CELL_CYCLE	43	0.810863	1.37526	0.0103093	1	1	2797	tags=9%, list=5%, signal=9%	MIR208A/MIR520A/MIR520H/MIR495
GOBP_PROGRAMMED_NECROTIC_CELL_DEATH	GOBP_PROGRAMMED_NECROTIC_CELL_DEATH	49	0.793794	1.36215	0.0103093	1	1	3396	tags=6%, list=6%, signal=6%	MIR107/MIR103A1/MIR485
GOBP_NECROPTOTIC_PROCESS	GOBP_NECROPTOTIC_PROCESS	41	0.809278	1.36879	0.0104167	1	1	3396	tags=7%, list=6%, signal=7%	MIR107/MIR103A1/MIR485
GOBP_INTERLEUKIN_6_MEDIATED_SIGNALING_PATHWAY	GOBP_INTERLEUKIN_6_MEDIATED_SIGNALING_PATHWAY	30	0.861076	1.41756	0.0105263	1	1	1899	tags=10%, list=3%, signal=10%	MIR125B1/MIRLET7C/MIR99A
GOBP_NEGATIVE_REGULATION_OF_ANION_TRANSMEMBRANE_TRANSPORT	GOBP_NEGATIVE_REGULATION_OF_ANION_TRANSMEMBRANE_TRANSPORT	34	0.790143	1.31501	0.0105263	1	1	2039	tags=6%, list=4%, signal=6%	MIR107/MIR103A1
GOBP_NEGATIVE_REGULATION_OF_VASCULAR_ASSOCIATED_SMOOTH_MUSCLE_CELL_PROLIFERATION	GOBP_NEGATIVE_REGULATION_OF_VASCULAR_ASSOCIATED_SMOOTH_MUSCLE_CELL_PROLIFERATION	30	0.805532	1.32612	0.0105263	1	1	1797	tags=13%, list=3%, signal=13%	MIR1-1/MIR182/MIR1298/MIR96
GOCC_MITOTIC_SPINDLE_POLE	GOCC_MITOTIC_SPINDLE_POLE	34	0.825336	1.37358	0.0105263	1	1	307	tags=3%, list=1%, signal=3%	OR2A4
HP_PERSISTENCE_OF_HEMOGLOBIN_F	HP_PERSISTENCE_OF_HEMOGLOBIN_F	30	0.79388	1.30693	0.0105263	1	1	261	tags=3%, list=0%, signal=3%	HBG1
GOBP_NEGATIVE_REGULATION_OF_RECEPTOR_SIGNALING_PATHWAY_VIA_STAT	GOBP_NEGATIVE_REGULATION_OF_RECEPTOR_SIGNALING_PATHWAY_VIA_STAT	32	0.823053	1.34919	0.0107527	1	1	3207	tags=12%, list=6%, signal=12%	MIR125B1/MIRLET7C/MIR99A/MIR9-1
GOCC_U1_SNRNP	GOCC_U1_SNRNP	31	0.811755	1.32752	0.0107527	1	1	1121	tags=6%, list=2%, signal=6%	RNU1-4/RNVU1-17
GOBP_REGULATION_OF_PROGRAMMED_NECROTIC_CELL_DEATH	GOBP_REGULATION_OF_PROGRAMMED_NECROTIC_CELL_DEATH	26	0.830988	1.35272	0.0108696	1	1	3396	tags=12%, list=6%, signal=11%	MIR107/MIR103A1/MIR485
GOMF_MRNA_5_UTR_BINDING	GOMF_MRNA_5_UTR_BINDING	26	0.840535	1.36826	0.0108696	1	1	413	tags=4%, list=1%, signal=4%	MIR346
GOBP_NEGATIVE_REGULATION_OF_GLUCOSE_TRANSMEMBRANE_TRANSPORT	GOBP_NEGATIVE_REGULATION_OF_GLUCOSE_TRANSMEMBRANE_TRANSPORT	18	0.854972	1.33805	0.0114943	1	1	2039	tags=11%, list=4%, signal=11%	MIR107/MIR103A1
GOBP_POSITIVE_REGULATION_OF_GLIAL_CELL_PROLIFERATION	GOBP_POSITIVE_REGULATION_OF_GLIAL_CELL_PROLIFERATION	18	0.862611	1.35001	0.0114943	1	1	15	tags=6%, list=0%, signal=6%	MIR125B1
GOBP_REGULATION_OF_METALLOPEPTIDASE_ACTIVITY	GOBP_REGULATION_OF_METALLOPEPTIDASE_ACTIVITY	17	0.869575	1.36235	0.0114943	1	1	482	tags=12%, list=1%, signal=12%	MIR152/MIR892B
GOBP_REGULATION_OF_TAU_PROTEIN_KINASE_ACTIVITY	GOBP_REGULATION_OF_TAU_PROTEIN_KINASE_ACTIVITY	13	0.886709	1.32352	0.0116279	1	1	15	tags=8%, list=0%, signal=8%	MIR125B1
GOCC_MITOTIC_SPINDLE_MIDZONE	GOCC_MITOTIC_SPINDLE_MIDZONE	14	0.903427	1.36369	0.0116279	1	1	307	tags=7%, list=1%, signal=7%	OR2A4
GOBP_LIPOPROTEIN_LOCALIZATION	GOBP_LIPOPROTEIN_LOCALIZATION	15	0.875696	1.33598	0.0117647	1	1	183	tags=13%, list=0%, signal=13%	MIR128-1/MIR301B
GOBP_REGULATION_OF_DEACETYLASE_ACTIVITY	GOBP_REGULATION_OF_DEACETYLASE_ACTIVITY	12	0.945663	1.42862	0.0117647	1	1	748	tags=8%, list=1%, signal=8%	MIR182
GOBP_REGULATION_OF_INTERLEUKIN_6_MEDIATED_SIGNALING_PATHWAY	GOBP_REGULATION_OF_INTERLEUKIN_6_MEDIATED_SIGNALING_PATHWAY	12	0.8896	1.34392	0.0117647	1	1	1899	tags=25%, list=3%, signal=24%	MIR125B1/MIRLET7C/MIR99A
GOBP_NEGATIVE_REGULATION_OF_METALLOPEPTIDASE_ACTIVITY	GOBP_NEGATIVE_REGULATION_OF_METALLOPEPTIDASE_ACTIVITY	10	0.926486	1.40431	0.0119048	1	1	482	tags=20%, list=1%, signal=20%	MIR152/MIR892B
GOBP_REGULATION_OF_HISTONE_DEACETYLASE_ACTIVITY	GOBP_REGULATION_OF_HISTONE_DEACETYLASE_ACTIVITY	10	0.949625	1.43939	0.0119048	1	1	748	tags=10%, list=1%, signal=10%	MIR182
GOBP_NECROTIC_CELL_DEATH	GOBP_NECROTIC_CELL_DEATH	61	0.750188	1.322	0.019802	1	1	3396	tags=5%, list=6%, signal=5%	MIR107/MIR103A1/MIR485
GOBP_REGULATION_OF_CELLULAR_AMIDE_METABOLIC_PROCESS	GOBP_REGULATION_OF_CELLULAR_AMIDE_METABOLIC_PROCESS	478	0.631404	1.13484	0.019802	1	1	3349	tags=4%, list=6%, signal=4%	MIR125B1/MIR1-1/MIR208A/MIR107/MIR518B/MIR346/MIR204/MIR520E/MIR182/MIR520B/MIR16-1/MIR31/MIR96/MIR103A1/MIR153-1/MIR218-1/MIR299/MIR9-1/MIR212/MIR877
GOCC_KERATIN_FILAMENT	GOCC_KERATIN_FILAMENT	94	0.712114	1.25072	0.019802	1	1	8250	tags=40%, list=15%, signal=35%	KRTAP3-3/KRTAP4-4/KRTAP9-1/KRTAP10-11/KRTAP9-4/KRTAP4-5/KRTAP12-2/KRTAP4-2/KRTAP5-5/KRTAP24-1/KRTAP9-9/KRTAP10-9/KRTAP4-8/KRTAP1-4/KRTAP4-9/KRTAP9-7/KRTAP10-8/KRTAP9-2/KRTAP1-1/KRTAP10-4/KRT76/KRTAP10-7/KRTAP4-12/KRTAP10-1/KRTAP10-2/KRTAP5-2/KRTAP3-1/KRTAP12-1/KRT13/KRT82/KRT77/KRTAP10-5/KRTAP10-10/KRTAP4-1/KRTAP9-3/KRTAP4-6/KRTAP10-3/KRTAP10-12
GOBP_POSITIVE_REGULATION_OF_CELL_CYCLE_G1_S_PHASE_TRANSITION	GOBP_POSITIVE_REGULATION_OF_CELL_CYCLE_G1_S_PHASE_TRANSITION	54	0.750891	1.30236	0.020202	1	1	2797	tags=7%, list=5%, signal=7%	MIR208A/MIR520A/MIR520H/MIR495
GOBP_REGULATION_OF_NECROTIC_CELL_DEATH	GOBP_REGULATION_OF_NECROTIC_CELL_DEATH	37	0.788392	1.34005	0.0206186	1	1	3396	tags=8%, list=6%, signal=8%	MIR107/MIR103A1/MIR485
GOCC_SPINDLE_MIDZONE	GOCC_SPINDLE_MIDZONE	36	0.786523	1.32709	0.0206186	1	1	307	tags=3%, list=1%, signal=3%	OR2A4
GOBP_POSITIVE_REGULATION_OF_VASCULAR_ASSOCIATED_SMOOTH_MUSCLE_CELL_DIFFERENTIATION	GOBP_POSITIVE_REGULATION_OF_VASCULAR_ASSOCIATED_SMOOTH_MUSCLE_CELL_DIFFERENTIATION	11	0.907902	1.36701	0.0229885	1	1	113	tags=18%, list=0%, signal=18%	MIR125B1/MIR1-1
GOBP_POSITIVE_REGULATION_OF_SMOOTH_MUSCLE_CELL_DIFFERENTIATION	GOBP_POSITIVE_REGULATION_OF_SMOOTH_MUSCLE_CELL_DIFFERENTIATION	16	0.846698	1.31513	0.0232558	1	1	113	tags=12%, list=0%, signal=12%	MIR125B1/MIR1-1
GOBP_REGULATION_OF_CELL_CYCLE_G1_S_PHASE_TRANSITION	GOBP_REGULATION_OF_CELL_CYCLE_G1_S_PHASE_TRANSITION	185	0.640941	1.15236	0.029703	1	1	2797	tags=4%, list=5%, signal=4%	MIR208A/MIR873/MIR520A/MIR892B/MIR520H/MIR16-1/MIR495
GOBP_NEGATIVE_REGULATION_OF_EPITHELIAL_CELL_DIFFERENTIATION	GOBP_NEGATIVE_REGULATION_OF_EPITHELIAL_CELL_DIFFERENTIATION	44	0.748036	1.26973	0.0309278	1	1	2797	tags=9%, list=5%, signal=9%	MIR1-1/MIR518B/REG3G/MIR495
GOCC_U12_TYPE_SPLICEOSOMAL_COMPLEX	GOCC_U12_TYPE_SPLICEOSOMAL_COMPLEX	29	0.788674	1.2944	0.0319149	1	1	4786	tags=3%, list=8%, signal=3%	RBMXL3
GOBP_POSITIVE_REGULATION_OF_MUSCLE_CELL_APOPTOTIC_PROCESS	GOBP_POSITIVE_REGULATION_OF_MUSCLE_CELL_APOPTOTIC_PROCESS	28	0.789569	1.28647	0.0322581	1	1	1378	tags=7%, list=2%, signal=7%	MIR1-1/MIR16-1
GOBP_NEGATIVE_REGULATION_OF_GLUCOSE_IMPORT	GOBP_NEGATIVE_REGULATION_OF_GLUCOSE_IMPORT	13	0.871922	1.30145	0.0348837	1	1	2039	tags=15%, list=4%, signal=15%	MIR107/MIR103A1
GOBP_NEGATIVE_REGULATION_OF_LIPOPOLYSACCHARIDE_MEDIATED_SIGNALING_PATHWAY	GOBP_NEGATIVE_REGULATION_OF_LIPOPOLYSACCHARIDE_MEDIATED_SIGNALING_PATHWAY	13	0.879075	1.31213	0.0348837	1	1	4253	tags=15%, list=8%, signal=14%	DEFB114/LACRT
GOBP_POSITIVE_REGULATION_OF_NECROTIC_CELL_DEATH	GOBP_POSITIVE_REGULATION_OF_NECROTIC_CELL_DEATH	14	0.874755	1.32041	0.0348837	1	1	2039	tags=14%, list=4%, signal=14%	MIR107/MIR103A1
GOBP_NEGATIVE_REGULATION_OF_LEUKOCYTE_ADHESION_TO_VASCULAR_ENDOTHELIAL_CELL	GOBP_NEGATIVE_REGULATION_OF_LEUKOCYTE_ADHESION_TO_VASCULAR_ENDOTHELIAL_CELL	12	0.872612	1.31826	0.0352941	1	1	1592	tags=17%, list=3%, signal=16%	MIR141/MIR31
GOBP_CARDIAC_VASCULAR_SMOOTH_MUSCLE_CELL_DIFFERENTIATION	GOBP_CARDIAC_VASCULAR_SMOOTH_MUSCLE_CELL_DIFFERENTIATION	10	0.866099	1.31278	0.0357143	1	1	113	tags=10%, list=0%, signal=10%	MIR1-1
GOBP_INTERLEUKIN_18_PRODUCTION	GOBP_INTERLEUKIN_18_PRODUCTION	10	0.886044	1.34302	0.0357143	1	1	375	tags=10%, list=1%, signal=10%	MIR411
GOBP_NEGATIVE_REGULATION_OF_ENDOTHELIAL_CELL_DIFFERENTIATION	GOBP_NEGATIVE_REGULATION_OF_ENDOTHELIAL_CELL_DIFFERENTIATION	10	0.872497	1.32248	0.0357143	1	1	2797	tags=20%, list=5%, signal=19%	MIR1-1/MIR495
GOBP_REVERSIBLE_DIFFERENTIATION	GOBP_REVERSIBLE_DIFFERENTIATION	10	0.874472	1.32548	0.0357143	1	1	748	tags=20%, list=1%, signal=20%	MIR1-1/MIR182
GOBP_KERATINIZATION	GOBP_KERATINIZATION	222	0.642424	1.1597	0.039604	1	1	10256	tags=36%, list=18%, signal=30%	KRTAP23-1/KRTAP27-1/KRTAP13-1/KRTAP15-1/KRTAP3-3/KRTAP4-4/KRTAP9-1/KRTAP21-3/KRTAP6-2/KRTAP13-3/KRTAP10-11/KRTAP9-4/KRTAP4-5/LCE3C/KRTAP12-2/KRTAP4-2/KRTAP5-5/SPRR4/KRTAP24-1/LCE2D/KRTAP19-4/KRTAP20-2/KRTAP9-9/KRTAP10-9/KRTAP4-8/KRTAP22-1/KRTAP19-2/KRTAP1-4/KRTAP4-9/KRTAP9-7/LCE2A/LCE2B/KRTAP10-8/KRTAP9-2/KRTAP1-1/KRT33B/LCE1D/KRTAP10-4/KRTAP17-1/KRTAP13-2/KRT76/KRTAP10-7/KRTAP10-1/KRTAP10-2/KRTA…
GOBP_REGULATION_OF_ENDOTHELIAL_CELL_DIFFERENTIATION	GOBP_REGULATION_OF_ENDOTHELIAL_CELL_DIFFERENTIATION	42	0.753305	1.27416	0.0416667	1	1	5488	tags=10%, list=10%, signal=9%	MIR1-1/MIR99B/MIR495/GDF2
GOBP_VASCULAR_ASSOCIATED_SMOOTH_MUSCLE_CELL_DIFFERENTIATION	GOBP_VASCULAR_ASSOCIATED_SMOOTH_MUSCLE_CELL_DIFFERENTIATION	34	0.768124	1.27836	0.0421053	1	1	113	tags=6%, list=0%, signal=6%	MIR125B1/MIR1-1
GOBP_POSITIVE_REGULATION_OF_CELL_AGING	GOBP_POSITIVE_REGULATION_OF_CELL_AGING	17	0.833091	1.30519	0.045977	1	1	2913	tags=12%, list=5%, signal=11%	MIR188/MIR217
GOBP_POSITIVE_REGULATION_OF_CHOLESTEROL_METABOLIC_PROCESS	GOBP_POSITIVE_REGULATION_OF_CHOLESTEROL_METABOLIC_PROCESS	10	0.855163	1.29621	0.047619	1	1	1797	tags=20%, list=3%, signal=19%	MIR182/MIR96
ESCA
ID	Description	setSize	enrichmentScore	NES	pvalue	p.adjust	qvalues	rank	leading_edge	core_enrichment
GOBP_DETECTION_OF_CHEMICAL_STIMULUS	GOBP_DETECTION_OF_CHEMICAL_STIMULUS	495	0.704771	1.48212	0.00990099	1	1	12483	tags=65%, list=22%, signal=51%	OR5H1/OR5AR1/OR8H3/OR5H15/OR52E1/OR2T11/OR4A15/OR4S2/OR5L2/OR5L1/OR5M8/OR4C45/OR4C15/OR2T12/OR52A4P/OR5M10/OR5M1/OR6K6/OR5I1/OR10Z1/OR4C11/OR4P4/OR2W1/OR4C46/OR51L1/OR14J1/OR52E2/OR5K4/OR52A5/OR10J3/OR6N2/OR5W2/OR5K3/OR5D18/OR14C36/OR6C4/TAS2R16/OR10J4/OR51B2/OR6C68/OR4N2/OR52E8/OR6P1/OR4K13/OR2M4/OR6C6/OR4A8/OR10H3/OR6Y1/OR4L1/OR2F2/OR6X1/OR4K14/OR52Z1/OR4F15/OR8I2/OR4X2/OR13C4/OR6N1/OR51M1/OR5F…
GOBP_SENSORY_PERCEPTION_OF_SMELL	GOBP_SENSORY_PERCEPTION_OF_SMELL	441	0.725266	1.52715	0.00990099	1	1	12483	tags=72%, list=22%, signal=56%	OR5H1/OR5AR1/OR8H3/OR5H15/OR52E1/OR2T11/OR4A15/OR4S2/OR5L2/OR5L1/OR5M8/OR4C45/OR4C15/OR2T12/OR52A4P/OR5M10/OR5M1/OR6K6/OR5I1/OR10Z1/OR4C11/OR4P4/OR2W1/OR4C46/OR51L1/OR14J1/OR52E2/OR5K4/OR52A5/OR10J3/OR6N2/OR5W2/OR5K3/OR5D18/OR14C36/OR6C4/OR10J4/OR51B2/OR6C68/OR4N2/OR52E8/OR6P1/OR4K13/OR2M4/OR6C6/OR4A8/OR10H3/OR6Y1/OR4L1/OR2F2/OR6X1/OR4K14/OR52Z1/OR4F15/OR8I2/OR4X2/OR13C4/OR6N1/OR51M1/OR5F1/OR4D6/…
GOMF_ODORANT_BINDING	GOMF_ODORANT_BINDING	114	0.778152	1.56657	0.00990099	1	1	8749	tags=69%, list=15%, signal=59%	OR5H1/OR5AR1/OR8H3/OR5H15/OR5L2/OR5L1/OR5M8/OR5M10/OR5M1/OR6K6/OR5I1/OR10Z1/OR14J1/OR5K4/OR10J3/OR6N2/OR5W2/OR5K3/OR5D18/OR14C36/OR10J4/OR8I2/OR5F1/OR8U1/OR8J1/OR5AC2/OR10K1/OR10T2/OR8K5/OR5H2/OR10K2/OR5H14/OR8D2/OR10R2/OR8A1/OR8H1/OR9Q2/OR5J2/OR5B17/OR8D4/OR8J3/OR5AS1/OR8H2/OR5AC1/OR5M3/OR8B8/OR8K1/OR9K2/OR5H8/OR8B12/OR8B4/OR9G4/OR5AP2/OR10J1/OR11L1/OR8J2/OR5A1/OR6K2/OR8G1/OR5D14/OR4E2/OR5P3/OR5…
GOMF_OLFACTORY_RECEPTOR_ACTIVITY	GOMF_OLFACTORY_RECEPTOR_ACTIVITY	417	0.731025	1.5425	0.00990099	1	1	10151	tags=66%, list=18%, signal=55%	OR5H1/OR5AR1/OR8H3/OR5H15/OR52E1/OR2T11/OR4A15/OR4S2/OR5L2/OR5L1/OR5M8/OR4C45/OR4C15/OR2T12/OR52A4P/OR5M10/OR5M1/OR6K6/OR5I1/OR10Z1/OR4C11/OR4P4/OR2W1/OR4C46/OR51L1/OR14J1/OR52E2/OR5K4/OR52A5/OR10J3/OR6N2/OR5W2/OR5K3/OR5D18/OR14C36/OR6C4/OR10J4/OR51B2/OR6C68/OR4N2/OR52E8/OR6P1/OR4K13/OR2M4/OR6C6/OR4A8/OR10H3/OR6Y1/OR4L1/OR2F2/OR6X1/OR4K14/OR52Z1/OR4F15/OR8I2/OR4X2/OR13C4/OR6N1/OR51M1/OR5F1/OR4D6/…
GOBP_PROTEIN_DNA_COMPLEX_DISASSEMBLY	GOBP_PROTEIN_DNA_COMPLEX_DISASSEMBLY	20	0.791744	1.46493	0.0104167	1	1	1222	tags=10%, list=2%, signal=10%	TNP1/H2BC1
GOBP_NEGATIVE_REGULATION_OF_LIPOPOLYSACCHARIDE_MEDIATED_SIGNALING_PATHWAY	GOBP_NEGATIVE_REGULATION_OF_LIPOPOLYSACCHARIDE_MEDIATED_SIGNALING_PATHWAY	13	0.829307	1.42523	0.010989	1	1	3347	tags=15%, list=6%, signal=14%	DEFB114/LACRT
GOBP_NEGATIVE_REGULATION_OF_PHOSPHATIDYLINOSITOL_3_KINASE_SIGNALING	GOBP_NEGATIVE_REGULATION_OF_PHOSPHATIDYLINOSITOL_3_KINASE_SIGNALING	15	0.861879	1.49292	0.010989	1	1	3816	tags=13%, list=7%, signal=12%	MIR449A/MIR206
GOBP_REGULATION_OF_VASCULAR_WOUND_HEALING	GOBP_REGULATION_OF_VASCULAR_WOUND_HEALING	11	0.859799	1.48871	0.010989	1	1	390	tags=9%, list=1%, signal=9%	MIR1298
GOCC_INTEGRATOR_COMPLEX	GOCC_INTEGRATOR_COMPLEX	28	0.747978	1.39593	0.0204082	1	1	7915	tags=21%, list=14%, signal=18%	CT45A2/SAGE2P/CT45A3/CT45A1/CT45A5/CT45A10
GOBP_CHROMATIN_DISASSEMBLY	GOBP_CHROMATIN_DISASSEMBLY	20	0.767039	1.41922	0.0208333	1	1	1222	tags=10%, list=2%, signal=10%	TNP1/H2BC1
GOBP_NEGATIVE_REGULATION_OF_VASCULAR_ENDOTHELIAL_GROWTH_FACTOR_PRODUCTION	GOBP_NEGATIVE_REGULATION_OF_VASCULAR_ENDOTHELIAL_GROWTH_FACTOR_PRODUCTION	19	0.789372	1.42298	0.0208333	1	1	4336	tags=26%, list=8%, signal=24%	MIR504/MIR134/MIR520G/MIR520H/MIR373
GOBP_VASCULAR_WOUND_HEALING	GOBP_VASCULAR_WOUND_HEALING	19	0.747834	1.3481	0.0208333	1	1	390	tags=5%, list=1%, signal=5%	MIR1298
GOBP_ALTERNATIVE_MRNA_SPLICING_VIA_SPLICEOSOME	GOBP_ALTERNATIVE_MRNA_SPLICING_VIA_SPLICEOSOME	73	0.630028	1.24804	0.03	1	1	530	tags=4%, list=1%, signal=4%	RBMY1A1/RBMY1F/RBMY1J
GOMF_NUCLEAR_LOCALIZATION_SEQUENCE_BINDING	GOMF_NUCLEAR_LOCALIZATION_SEQUENCE_BINDING	27	0.72187	1.35077	0.0306122	1	1	5472	tags=11%, list=10%, signal=10%	NPAP1/POM121L2/POM121L12
GOBP_SNRNA_PROCESSING	GOBP_SNRNA_PROCESSING	36	0.686933	1.31863	0.0408163	1	1	7915	tags=17%, list=14%, signal=14%	CT45A2/SAGE2P/CT45A3/CT45A1/CT45A5/CT45A10
GOBP_REGULATION_OF_LIPOPOLYSACCHARIDE_MEDIATED_SIGNALING_PATHWAY	GOBP_REGULATION_OF_LIPOPOLYSACCHARIDE_MEDIATED_SIGNALING_PATHWAY	25	0.717678	1.33065	0.0412371	1	1	3347	tags=8%, list=6%, signal=8%	DEFB114/LACRT
GOCC_MALE_GERM_CELL_NUCLEUS	GOCC_MALE_GERM_CELL_NUCLEUS	14	0.784087	1.33938	0.0449438	1	1	2696	tags=21%, list=5%, signal=20%	TNP1/SYCP1/MORC1
GBM
ID	Description	setSize	enrichmentScore	NES	pvalue	p.adjust	qvalues	rank	leading_edge	core_enrichment
GOMF_MRNA_BINDING	GOMF_MRNA_BINDING	485	0.49059	1.29821	0.0117647	1	1	6824	tags=13%, list=12%, signal=12%	MIR139/MIR654/MIR218-1/MIR373/MIR495/MIR449A/MIR129-1/MIR208A/MIR1224/MIR767/MIR107/MIR133B/MIR183/MIR411/MIR30B/MIR154/MIR103A1/MIR182/MIR329-1/MIR638/MIR494/MIR488/LIN28A/PIWIL1/MIR181A2/MIR200A/MIR96/MIR483/MIR99A/MIR487B/MIR191/MIR543/MIR196A1/MIR588/MIR200B/RBMXL3/MIR98/MIR328/MIR365A/MIR342/MIR194-1/APOBEC1/MIR30E/MIR644A/MIR613/MIR217/MIR101-1/MIR181C/DAZL/RBMXL2/BX284668.2/ZAR1L/MIR425/IG…
GOBP_HORMONE_MEDIATED_SIGNALING_PATHWAY	GOBP_HORMONE_MEDIATED_SIGNALING_PATHWAY	193	0.597021	1.45209	0.0121951	1	1	3825	tags=6%, list=7%, signal=6%	MIR208A/CGB1/DEFA1/DEFA1B/ISL1/CGB2/REN/TCF21/FOXA1/POU4F2/FSHB/NR5A1
GOMF_RNA_BINDING_INVOLVED_IN_POSTTRANSCRIPTIONAL_GENE_SILENCING	GOMF_RNA_BINDING_INVOLVED_IN_POSTTRANSCRIPTIONAL_GENE_SILENCING	192	0.561088	1.36218	0.0123457	1	1	6824	tags=29%, list=12%, signal=25%	MIR139/MIR654/MIR218-1/MIR373/MIR495/MIR449A/MIR129-1/MIR208A/MIR1224/MIR767/MIR107/MIR133B/MIR183/MIR411/MIR30B/MIR154/MIR103A1/MIR182/MIR329-1/MIR638/MIR494/MIR488/MIR181A2/MIR200A/MIR96/MIR483/MIR99A/MIR487B/MIR191/MIR543/MIR196A1/MIR588/MIR200B/MIR98/MIR328/MIR365A/MIR342/MIR194-1/MIR30E/MIR644A/MIR613/MIR217/MIR101-1/MIR181C/ZAR1L/MIR425/MIR345/MIR208B/MIR135B/MIR148A/MIR199B/MIR320A/MIR892B…
GOBP_RESPONSE_TO_DSRNA	GOBP_RESPONSE_TO_DSRNA	54	0.754181	1.59366	0.0138889	1	1	6420	tags=24%, list=11%, signal=21%	IFNA7/IFNA17/IFNA10/IFNA4/IFNA14/IFNA8/IFNK/IFNA1/IFNW1/IFNA5/IFNE/IFNA6/IFNB1
GOBP_INTRACELLULAR_STEROID_HORMONE_RECEPTOR_SIGNALING_PATHWAY	GOBP_INTRACELLULAR_STEROID_HORMONE_RECEPTOR_SIGNALING_PATHWAY	113	0.621077	1.45913	0.0140845	1	1	2861	tags=5%, list=5%, signal=5%	DEFA1/DEFA1B/ISL1/TCF21/FOXA1/POU4F2
GOBP_POSITIVE_REGULATION_OF_G1_S_TRANSITION_OF_MITOTIC_CELL_CYCLE	GOBP_POSITIVE_REGULATION_OF_G1_S_TRANSITION_OF_MITOTIC_CELL_CYCLE	43	0.810332	1.6975	0.0140845	1	1	382	tags=5%, list=1%, signal=5%	MIR495/MIR208A
GOBP_POSITIVE_REGULATION_OF_PEPTIDYL_SERINE_PHOSPHORYLATION	GOBP_POSITIVE_REGULATION_OF_PEPTIDYL_SERINE_PHOSPHORYLATION	107	0.660375	1.52796	0.0142857	1	1	6420	tags=16%, list=11%, signal=14%	IFNA7/IFNA17/IFNA10/TCL1B/GCG/IFNA4/IFNA14/NTF3/IFNA8/IFNK/IFNA1/IFNG/IFNW1/IFNA5/IFNE/IFNA6/IFNB1
GOBP_REGULATION_OF_PEPTIDYL_SERINE_PHOSPHORYLATION	GOBP_REGULATION_OF_PEPTIDYL_SERINE_PHOSPHORYLATION	142	0.60976	1.41811	0.0142857	1	1	6420	tags=12%, list=11%, signal=11%	IFNA7/IFNA17/IFNA10/TCL1B/GCG/IFNA4/IFNA14/NTF3/IFNA8/IFNK/IFNA1/IFNG/IFNW1/IFNA5/IFNE/IFNA6/IFNB1
GOBP_INTRACELLULAR_ESTROGEN_RECEPTOR_SIGNALING_PATHWAY	GOBP_INTRACELLULAR_ESTROGEN_RECEPTOR_SIGNALING_PATHWAY	57	0.752111	1.58132	0.0144928	1	1	2861	tags=9%, list=5%, signal=8%	DEFA1/DEFA1B/ISL1/FOXA1/POU4F2
GOBP_RESPONSE_TO_TYPE_I_INTERFERON	GOBP_RESPONSE_TO_TYPE_I_INTERFERON	100	0.634417	1.44815	0.0144928	1	1	6699	tags=11%, list=12%, signal=10%	IFNA7/IFNA17/IFNA10/IFNA4/IFNA14/IFNA8/IFNA1/IFNA5/IFNA6/IFNB1/DCST1
GOBP_MODULATION_BY_SYMBIONT_OF_HOST_PROCESS	GOBP_MODULATION_BY_SYMBIONT_OF_HOST_PROCESS	37	0.802589	1.64446	0.015873	1	1	1287	tags=5%, list=2%, signal=5%	DEFA1/DEFA1B
GOBP_NEGATIVE_REGULATION_OF_SMOOTH_MUSCLE_CELL_MIGRATION	GOBP_NEGATIVE_REGULATION_OF_SMOOTH_MUSCLE_CELL_MIGRATION	28	0.813543	1.6133	0.0169492	1	1	2115	tags=11%, list=4%, signal=10%	MIR218-1/MIR182/MIR638
GOBP_SERINE_PHOSPHORYLATION_OF_STAT_PROTEIN	GOBP_SERINE_PHOSPHORYLATION_OF_STAT_PROTEIN	27	0.811671	1.58748	0.0169492	1	1	6420	tags=52%, list=11%, signal=46%	IFNA7/IFNA17/IFNA10/IFNA4/IFNA14/IFNA8/IFNK/IFNA1/IFNG/IFNW1/IFNA5/IFNE/IFNA6/IFNB1
GOBP_CHAPERONE_MEDIATED_PROTEIN_COMPLEX_ASSEMBLY	GOBP_CHAPERONE_MEDIATED_PROTEIN_COMPLEX_ASSEMBLY	22	0.825932	1.50872	0.0172414	1	1	1210	tags=5%, list=2%, signal=4%	APCS
GOBP_IRON_SULFUR_CLUSTER_ASSEMBLY	GOBP_IRON_SULFUR_CLUSTER_ASSEMBLY	24	0.869595	1.62758	0.0172414	1	1	736	tags=4%, list=1%, signal=4%	BOLA2
GOBP_REGULATION_OF_PEPTIDYL_SERINE_PHOSPHORYLATION_OF_STAT_PROTEIN	GOBP_REGULATION_OF_PEPTIDYL_SERINE_PHOSPHORYLATION_OF_STAT_PROTEIN	23	0.823985	1.5417	0.0172414	1	1	6420	tags=61%, list=11%, signal=54%	IFNA7/IFNA17/IFNA10/IFNA4/IFNA14/IFNA8/IFNK/IFNA1/IFNG/IFNW1/IFNA5/IFNE/IFNA6/IFNB1
GOBP_PROTEIN_MATURATION_BY_IRON_SULFUR_CLUSTER_TRANSFER	GOBP_PROTEIN_MATURATION_BY_IRON_SULFUR_CLUSTER_TRANSFER	16	0.916807	1.64171	0.0175439	1	1	736	tags=6%, list=1%, signal=6%	BOLA2
GOBP_POSITIVE_REGULATION_OF_GLUCONEOGENESIS	GOBP_POSITIVE_REGULATION_OF_GLUCONEOGENESIS	15	0.893598	1.55328	0.0178571	1	1	2238	tags=20%, list=4%, signal=19%	MIR107/MIR103A1/GCG
GOBP_REGULATION_OF_SKELETAL_MUSCLE_CELL_DIFFERENTIATION	GOBP_REGULATION_OF_SKELETAL_MUSCLE_CELL_DIFFERENTIATION	19	-0.814498	-1.55763	0.0208333	1	1	283	tags=16%, list=1%, signal=16%	MYOCD/TBX1/MIR1-1
HP_DISTAL_PERIPHERAL_SENSORY_NEUROPATHY	HP_DISTAL_PERIPHERAL_SENSORY_NEUROPATHY	19	-0.817011	-1.56244	0.0208333	1	1	4	tags=11%, list=0%, signal=11%	MT-TH/MT-TQ
HP_STUTTERING	HP_STUTTERING	18	-0.806182	-1.5255	0.0212766	1	1	4	tags=11%, list=0%, signal=11%	MT-TH/MT-TQ
GOBP_REGULATION_OF_CARDIAC_MUSCLE_CONTRACTION_BY_REGULATION_OF_THE_RELEASE_OF_SEQUESTERED_CALCIUM_ION	GOBP_REGULATION_OF_CARDIAC_MUSCLE_CONTRACTION_BY_REGULATION_OF_THE_RELEASE_OF_SEQUESTERED_CALCIUM_ION	21	-0.859183	-1.6953	0.0217391	1	1	283	tags=10%, list=1%, signal=9%	PLN/MIR1-1
HP_MIXED_DEMYELINATING_AND_AXONAL_POLYNEUROPATHY	HP_MIXED_DEMYELINATING_AND_AXONAL_POLYNEUROPATHY	15	-0.824596	-1.46862	0.0217391	1	1	4	tags=13%, list=0%, signal=13%	MT-TH/MT-TQ
GOBP_POSITIVE_REGULATION_OF_SMOOTH_MUSCLE_CELL_DIFFERENTIATION	GOBP_POSITIVE_REGULATION_OF_SMOOTH_MUSCLE_CELL_DIFFERENTIATION	16	-0.805204	-1.4389	0.0222222	1	1	283	tags=19%, list=1%, signal=19%	MIR140/SHH/MIR1-1
GOBP_TROPHOBLAST_CELL_MIGRATION	GOBP_TROPHOBLAST_CELL_MIGRATION	16	-0.815619	-1.45751	0.0222222	1	1	3878	tags=12%, list=7%, signal=12%	APELA/MIR15B
HP_APLASIA_HYPOPLASIA_OF_THE_CEREBRAL_WHITE_MATTER	HP_APLASIA_HYPOPLASIA_OF_THE_CEREBRAL_WHITE_MATTER	25	-0.783742	-1.61636	0.0222222	1	1	4	tags=8%, list=0%, signal=8%	MT-TH/MT-TQ
HP_CONCENTRIC_HYPERTROPHIC_CARDIOMYOPATHY	HP_CONCENTRIC_HYPERTROPHIC_CARDIOMYOPATHY	16	-0.807974	-1.44385	0.0222222	1	1	4	tags=12%, list=0%, signal=13%	MT-TH/MT-TQ
GOBP_POSITIVE_REGULATION_OF_HEART_RATE	GOBP_POSITIVE_REGULATION_OF_HEART_RATE	26	-0.752783	-1.55685	0.0227273	1	1	283	tags=8%, list=1%, signal=8%	KCNQ1/MIR1-1
GOBP_REGULATION_OF_CARDIAC_MUSCLE_CONTRACTION_BY_CALCIUM_ION_SIGNALING	GOBP_REGULATION_OF_CARDIAC_MUSCLE_CONTRACTION_BY_CALCIUM_ION_SIGNALING	26	-0.811261	-1.67779	0.0227273	1	1	283	tags=8%, list=1%, signal=8%	PLN/MIR1-1
GOBP_REGULATION_OF_VASCULAR_ASSOCIATED_SMOOTH_MUSCLE_CELL_DIFFERENTIATION	GOBP_REGULATION_OF_VASCULAR_ASSOCIATED_SMOOTH_MUSCLE_CELL_DIFFERENTIATION	23	-0.80382	-1.61313	0.0227273	1	1	2047	tags=13%, list=4%, signal=13%	MIR26A1/MIR15B/MIR1-1
HP_ABNORMAL_BRAIN_LACTATE_LEVEL_BY_MRS	HP_ABNORMAL_BRAIN_LACTATE_LEVEL_BY_MRS	23	-0.793105	-1.59163	0.0227273	1	1	4	tags=9%, list=0%, signal=9%	MT-TH/MT-TQ
HP_FLUCTUATIONS_IN_CONSCIOUSNESS	HP_FLUCTUATIONS_IN_CONSCIOUSNESS	22	-0.802267	-1.61302	0.0227273	1	1	4	tags=9%, list=0%, signal=9%	MT-TH/MT-TQ
HP_STROKE_LIKE_EPISODE	HP_STROKE_LIKE_EPISODE	24	-0.785592	-1.60811	0.0227273	1	1	4	tags=8%, list=0%, signal=8%	MT-TH/MT-TQ
HP_PROGRESSIVE_EXTERNAL_OPHTHALMOPLEGIA	HP_PROGRESSIVE_EXTERNAL_OPHTHALMOPLEGIA	36	-0.735356	-1.64133	0.025	1	1	4364	tags=14%, list=8%, signal=13%	MT-TH/MT-TN/MT-TT/MT-TL2/MT-TQ
HP_ABNORMAL_METABOLIC_BRAIN_IMAGING_BY_MRS	HP_ABNORMAL_METABOLIC_BRAIN_IMAGING_BY_MRS	37	-0.724265	-1.61773	0.025641	1	1	4	tags=5%, list=0%, signal=5%	MT-TH/MT-TQ
HP_EPISODIC_VOMITING	HP_EPISODIC_VOMITING	39	-0.767111	-1.71913	0.025641	1	1	4	tags=10%, list=0%, signal=10%	MT-TW/MT-TF/NLRC4/MT-TQ
HP_RECURRENT_PAROXYSMAL_HEADACHE	HP_RECURRENT_PAROXYSMAL_HEADACHE	32	-0.785757	-1.68226	0.025641	1	1	4	tags=6%, list=0%, signal=6%	MT-TH/MT-TQ
HP_VENTRICULAR_PREEXCITATION	HP_VENTRICULAR_PREEXCITATION	32	-0.718376	-1.538	0.025641	1	1	4	tags=6%, list=0%, signal=6%	MT-TH/MT-TQ
HP_MITOCHONDRIAL_INHERITANCE	HP_MITOCHONDRIAL_INHERITANCE	30	-0.858085	-1.79276	0.0263158	1	1	10	tags=13%, list=0%, signal=13%	MT-TN/MT-TT/MT-TI/MT-TQ
GOBP_POSITIVE_REGULATION_OF_CELL_CYCLE_G1_S_PHASE_TRANSITION	GOBP_POSITIVE_REGULATION_OF_CELL_CYCLE_G1_S_PHASE_TRANSITION	54	0.740307	1.56435	0.0277778	1	1	382	tags=4%, list=1%, signal=4%	MIR495/MIR208A
GOBP_MODULATION_OF_PROCESS_OF_OTHER_ORGANISM_INVOLVED_IN_SYMBIOTIC_INTERACTION	GOBP_MODULATION_OF_PROCESS_OF_OTHER_ORGANISM_INVOLVED_IN_SYMBIOTIC_INTERACTION	98	0.628291	1.44349	0.028169	1	1	1287	tags=3%, list=2%, signal=3%	APCS/DEFA1/DEFA1B
GOBP_RESPONSE_TO_CHEMOKINE	GOBP_RESPONSE_TO_CHEMOKINE	95	-0.556524	-1.46204	0.0285714	1	1	12398	tags=53%, list=22%, signal=41%	LOX/CXCL11/CXCL10/CCL22/ZC3H12A/ACKR4/CCR4/CXCR3/CXCL12/CCL21/MPL/CCR7/CCL5/CCL4/CXCL13/CCL3/CX3CR1/CMKLR1/CCR1/PF4/CCL2/DOCK8/CCL3L3/PPBP/CXCL2/CCR5/CCRL2/CXCL5/ACKR2/CXCR2/CCR2/CCL26/CXCL1/CXCR1/XCL2/CCL14/CXCL8/CCL8/CXCL3/CXCR6/CCR9/CCL18/CCL20/PF4V1/CCL23/REG1A/CCR3/XCR1/CCL7/CXCL6
GOBP_POSITIVE_REGULATION_OF_B_CELL_ACTIVATION	GOBP_POSITIVE_REGULATION_OF_B_CELL_ACTIVATION	139	-0.735079	-2.05925	0.0294118	1	1	4728	tags=34%, list=8%, signal=31%	IGHA2/IGHV4-4/IGHV4-39/IGHV3-15/IGHV4-61/IGHV3-30/IGLC7/IGHV3-74/IGHD/IGHV5-51/IGHV4-59/IGHV3-21/IGHV1-18/IGHV4-34/IGHV3-72/IGHV3-33/IGHV6-1/IGLL5/IGHV4-31/IGHV1OR15-1/IGHV3-48/IGHV2-5/IGHV1-69/IGHV1-24/IGHV7-81/IGHV3-35/IGHV3-49/IGHV3-53/IGHV3-7/IGHV1-69D/IGHV2-26/IGLC6/IGHV3-38/IGHV2-70D/IGHV3-11/IGHV2-70/IGHV3-73/IGHV1-45/IGHV1-3/IGHV3-66/IGHV4-28/IGHV3-43/IGHV3-64/IGHV3-13/IGHV1-58/IGHV3-20/I…
HP_BASAL_GANGLIA_CALCIFICATION	HP_BASAL_GANGLIA_CALCIFICATION	41	-0.742643	-1.6566	0.0294118	1	1	4	tags=5%, list=0%, signal=5%	MT-TH/MT-TQ
GOBP_PHAGOCYTOSIS_RECOGNITION	GOBP_PHAGOCYTOSIS_RECOGNITION	87	-0.796718	-2.04918	0.030303	1	1	4728	tags=56%, list=8%, signal=52%	IGHA2/IGHV4-4/IGHV4-39/C4BPB/IGHV3-15/IGHV4-61/IGHV3-30/IGLC7/IGHV3-74/IGHD/IGHV5-51/IGHV4-59/IGHV3-21/IGHV1-18/IGHV4-34/IGHV3-72/IGHV3-33/IGHV6-1/IGLL5/C4BPA/IGHV4-31/IGHV1OR15-1/IGHV3-48/IGHV2-5/IGHV1-69/IGHV1-24/IGHV7-81/IGHV3-35/IGHV3-49/IGHV3-53/IGHV3-7/IGHV1-69D/IGHV2-26/IGLC6/IGHV3-38/IGHV2-70D/IGHV3-11/IGHV2-70/IGHV3-73/IGHV1-45/IGHV1-3/IGHV3-66/IGHV4-28/IGHV3-43/IGHV3-64/IGHV3-13/IGHV1-5…
GOBP_REGULATION_OF_HUMORAL_IMMUNE_RESPONSE	GOBP_REGULATION_OF_HUMORAL_IMMUNE_RESPONSE	137	-0.57139	-1.58315	0.030303	1	1	6012	tags=44%, list=11%, signal=39%	IGKV3-20/KLK7/TNF/CD5L/IGHV3-23/IGLV2-14/IGKV4-1/IGLV1-51/C5AR2/IGLV3-21/IGHV4-39/IGKV1-5/IGLV1-47/IGLV1-44/C7/C4BPB/IGLV1-40/IGLV3-19/IGLV3-1/IGHV3-30/IGLC7/IGHV4-59/IGLV2-11/IGKV1-17/IGLV2-23/IGLV7-43/IGKV3-15/IGKV1-39/IGLV3-25/IGHV4-34/IGLV2-8/IGKV1-16/CR1/IGHV3-33/C4BPA/IGHV1OR15-1/IGHV3-48/IGHV2-5/IGKV2-28/IGHV1-69/IGKV1-12/IGKV1D-39/IGKV2-30/IGHV3-53/IGHV3-7/IGLV6-57/IGLC6/IGKV3D-20/IGHV3-1…
GOBP_B_CELL_RECEPTOR_SIGNALING_PATHWAY	GOBP_B_CELL_RECEPTOR_SIGNALING_PATHWAY	120	-0.753837	-1.99259	0.03125	1	1	9281	tags=60%, list=16%, signal=50%	NCKAP1L/IGHM/IGHG2/CD79A/MNDA/PTPRC/SYK/BLNK/NFATC2/IGHG3/IGLC3/TEC/LCK/IGKC/PLCG2/TRBC1/KLHL6/PTPN22/FCGR2B/IGHG1/IGLC2/IGHA1/ITK/IGHV3-23/CD22/IGHA2/IGHV4-4/IGHV4-39/IGHV3-15/IGHV4-61/IGHV3-30/IGLC7/IGHV3-74/IGHD/IGHV5-51/IGHV4-59/IGHV3-21/IGHV1-18/IGHV4-34/IGHV3-72/IGHV3-33/IGHV6-1/IGLL5/IGHV4-31/IGHV1OR15-1/IGHV3-48/IGHV2-5/IGHV1-69/IGHV1-24/IGHV7-81/IGHV3-35/IGHV3-49/IGHV3-53/IGHV3-7/IGHV1-6…
GOBP_MEMBRANE_INVAGINATION	GOBP_MEMBRANE_INVAGINATION	132	-0.734683	-2.01839	0.03125	1	1	4977	tags=36%, list=9%, signal=33%	MARCO/IGHA2/IGHV4-4/IGHV4-39/IGHV3-15/IGHV4-61/IGHV3-30/IGLC7/IGHV3-74/IGHD/IGHV5-51/IGHV4-59/IGHV3-21/IGHV1-18/IGHV4-34/IGHV3-72/IGHV3-33/IGHV6-1/IGLL5/IGHV4-31/IGHV1OR15-1/IGHV3-48/IGHV2-5/IGHV1-69/IGHV1-24/IGHV7-81/IGHV3-35/IGHV3-49/IGHV3-53/IGHV3-7/IGHV1-69D/IGHV2-26/IGLC6/IGHV3-38/IGHV2-70D/IGHV3-11/IGHV2-70/IGHV3-73/IGHV1-45/IGHV1-3/IGHV3-66/IGHV4-28/IGHV3-43/IGHV3-64/IGHV3-13/IGHV1-58/IGHV…
GOBP_NEUTROPHIL_CHEMOTAXIS	GOBP_NEUTROPHIL_CHEMOTAXIS	99	-0.562505	-1.44719	0.03125	1	1	12515	tags=53%, list=22%, signal=41%	RAC2/CXCL11/ITGB2/MPP1/CXCL10/CCL22/ITGA1/LGALS3/C3AR1/BST1/C5AR1/CCL21/CCR7/CCL5/S100A9/CCL4/DPP4/CXCL13/VAV1/NCKAP1L/CCL3/SYK/PF4/CCL2/CSF3R/CCL3L3/PPBP/NOD2/CXCL2/S100A12/SAA1/CXCL5/CXCR2/S100A8/CCL26/PIK3CG/CXCL1/CXCR1/XCL2/CCL14/CXCL8/LBP/CCL8/CXCL3/JAML/CCL18/C5AR2/CCL20/PF4V1/CCL23/CCL7/CXCL6
GOBP_REGULATION_OF_VASCULAR_ENDOTHELIAL_GROWTH_FACTOR_RECEPTOR_SIGNALING_PATHWAY	GOBP_REGULATION_OF_VASCULAR_ENDOTHELIAL_GROWTH_FACTOR_RECEPTOR_SIGNALING_PATHWAY	31	0.752263	1.50154	0.03125	1	1	385	tags=3%, list=1%, signal=3%	MIR1224
HP_INCREASED_CSF_LACTATE	HP_INCREASED_CSF_LACTATE	99	-0.643927	-1.65667	0.03125	1	1	4	tags=3%, list=0%, signal=3%	MT-TH/MT-TN/MT-TQ
HP_INCREASED_SERUM_PYRUVATE	HP_INCREASED_SERUM_PYRUVATE	52	-0.812186	-1.83239	0.03125	1	1	10	tags=4%, list=0%, signal=4%	COX6A2/MT-TI
HP_MITOCHONDRIAL_MYOPATHY	HP_MITOCHONDRIAL_MYOPATHY	63	-0.689513	-1.63431	0.03125	1	1	4	tags=3%, list=0%, signal=3%	MT-TT/MT-TQ
GOBP_NEUTROPHIL_MIGRATION	GOBP_NEUTROPHIL_MIGRATION	118	-0.573375	-1.50562	0.0322581	1	1	12515	tags=52%, list=22%, signal=40%	RAC2/CXCL11/ITGB2/MPP1/CXCL10/CCL22/ITGA1/SLAMF8/LGALS3/C3AR1/BST1/C5AR1/CCL21/CCR7/PRTN3/CCL5/S100A9/CCL4/DPP4/ADAM8/CXCL13/VAV1/NCKAP1L/CCL3/SYK/PF4/CCL2/CSF3R/CCL3L3/PPBP/NOD2/CXCL2/UMODL1/S100A12/RHOH/SAA1/XG/CXCL5/IL1R1/CXCR2/S100A8/CCL26/PIK3CG/CXCL1/CXCR1/XCL2/CCL14/CXCL8/LBP/CCL8/CXCL3/JAML/CCL18/C5AR2/CCL20/PF4V1/CCL23/UMOD/CD177/CCL7/CXCL6
GOBP_REGULATION_OF_COMPLEMENT_ACTIVATION	GOBP_REGULATION_OF_COMPLEMENT_ACTIVATION	114	-0.651579	-1.67438	0.0322581	1	1	5426	tags=50%, list=10%, signal=45%	CD5L/IGHV3-23/IGLV2-14/IGKV4-1/IGLV1-51/C5AR2/IGLV3-21/IGHV4-39/IGKV1-5/IGLV1-47/IGLV1-44/C7/C4BPB/IGLV1-40/IGLV3-19/IGLV3-1/IGHV3-30/IGLC7/IGHV4-59/IGLV2-11/IGKV1-17/IGLV2-23/IGLV7-43/IGKV3-15/IGKV1-39/IGLV3-25/IGHV4-34/IGLV2-8/IGKV1-16/CR1/IGHV3-33/C4BPA/IGHV1OR15-1/IGHV3-48/IGHV2-5/IGKV2-28/IGHV1-69/IGKV1-12/IGKV1D-39/IGKV2-30/IGHV3-53/IGHV3-7/IGLV6-57/IGLC6/IGKV3D-20/IGHV3-11/IGHV2-70/IGKV2-2…
HP_ABNORMAL_CSF_METABOLITE_LEVEL	HP_ABNORMAL_CSF_METABOLITE_LEVEL	118	-0.584678	-1.5353	0.0322581	1	1	4	tags=3%, list=0%, signal=3%	MT-TH/MT-TN/MT-TQ
HP_ABNORMAL_MITOCHONDRIA_IN_MUSCLE_TISSUE	HP_ABNORMAL_MITOCHONDRIA_IN_MUSCLE_TISSUE	46	-0.759148	-1.6633	0.0322581	1	1	4364	tags=9%, list=8%, signal=8%	MT-TH/MT-TN/MT-TL2/MT-TQ
HP_MUSCLE_ABNORMALITY_RELATED_TO_MITOCHONDRIAL_DYSFUNCTION	HP_MUSCLE_ABNORMALITY_RELATED_TO_MITOCHONDRIAL_DYSFUNCTION	81	-0.658764	-1.66254	0.0322581	1	1	4203	tags=5%, list=7%, signal=5%	MT-TN/MT-TT/MT-TL2/MT-TQ
GOBP_FC_RECEPTOR_MEDIATED_STIMULATORY_SIGNALING_PATHWAY	GOBP_FC_RECEPTOR_MEDIATED_STIMULATORY_SIGNALING_PATHWAY	144	-0.759246	-2.10843	0.0333333	1	1	7297	tags=40%, list=13%, signal=35%	IGKC/PLCG2/FCGR2B/IGHG1/IGLC2/MYO1G/IGKV3-20/IGHV3-23/CD226/IGLV2-14/IGKV4-1/IGLV1-51/IGLV3-21/IGHV4-39/IGKV1-5/IGLV1-47/IGLV1-44/IGLV1-40/IGLV3-19/IGLV3-1/IGHV3-30/IGLC7/IGHV4-59/IGLV2-11/IGKV1-17/IGLV2-23/IGLV7-43/IGKV3-15/IGKV1-39/IGLV3-25/IGHV4-34/IGLV2-8/IGKV1-16/IGHV3-33/IGHV1OR15-1/IGHV3-48/IGHV2-5/IGKV2-28/IGHV1-69/IGKV1-12/IGKV1D-39/IGKV2-30/IGHV3-53/IGHV3-7/IGLV6-57/IGLC6/IGKV3D-20/IGHV…
GOBP_HUMORAL_IMMUNE_RESPONSE_MEDIATED_BY_CIRCULATING_IMMUNOGLOBULIN	GOBP_HUMORAL_IMMUNE_RESPONSE_MEDIATED_BY_CIRCULATING_IMMUNOGLOBULIN	145	-0.742611	-2.07909	0.0333333	1	1	5032	tags=59%, list=9%, signal=54%	IGLV2-14/IGKV4-1/IGLV1-51/IGHA2/IGLV3-21/IGHV4-4/IGHV4-39/IGKV1-5/IGLV1-47/IGLV1-44/C7/C4BPB/IGLV1-40/IGHV3-15/IGLV3-19/IGLV3-1/IGHV4-61/IGHV3-30/IGLC7/IGHV3-74/IGHD/IGHV5-51/IGHV4-59/IGLV2-11/IGKV1-17/IGLV2-23/IGLV7-43/IGKV3-15/IGKV1-39/IGLV3-25/IGHV3-21/IGHV1-18/IGHV4-34/IGLV2-8/IGHV3-72/IGKV1-16/CR1/IGHV3-33/IGHV6-1/IGLL5/C4BPA/IGHV4-31/IGHV1OR15-1/IGHV3-48/IGHV2-5/IGKV2-28/IGHV1-69/IGKV1-12/I…
GOCC_IMMUNOGLOBULIN_COMPLEX_CIRCULATING	GOCC_IMMUNOGLOBULIN_COMPLEX_CIRCULATING	66	-0.855848	-1.99547	0.0333333	1	1	4728	tags=73%, list=8%, signal=67%	IGHA2/IGHV4-4/IGHV4-39/IGHV3-15/JCHAIN/IGHV4-61/IGHV3-30/IGLC7/IGHV3-74/IGHD/IGHV5-51/IGHV4-59/IGHV3-21/IGHV1-18/IGHV4-34/IGHV3-72/IGHV3-33/IGHV6-1/IGLL5/IGHV4-31/IGHV1OR15-1/IGHV3-48/IGHV2-5/IGHV1-69/IGHV1-24/IGHV7-81/IGHV3-35/IGHV3-49/IGHV3-53/IGHV3-7/IGHV1-69D/IGHV2-26/IGLC6/IGHV3-38/IGHV2-70D/IGHV3-11/IGHV2-70/IGHV3-73/IGHV1-45/IGHV1-3/IGHV3-66/IGHV4-28/IGHV3-43/IGHV3-64/IGHV3-13/IGHV1-58/IGH…
GOMF_IMMUNOGLOBULIN_RECEPTOR_BINDING	GOMF_IMMUNOGLOBULIN_RECEPTOR_BINDING	68	-0.854774	-1.98319	0.0333333	1	1	4728	tags=71%, list=8%, signal=65%	IGHA2/IGHV4-4/IGHV4-39/IGHV3-15/JCHAIN/IGHV4-61/IGHV3-30/IGLC7/IGHV3-74/IGHD/IGHV5-51/IGHV4-59/IGHV3-21/IGHV1-18/IGHV4-34/IGHV3-72/IGHV3-33/IGHV6-1/IGLL5/IGHV4-31/IGHV1OR15-1/IGHV3-48/IGHV2-5/IGHV1-69/IGHV1-24/IGHV7-81/IGHV3-35/IGHV3-49/IGHV3-53/IGHV3-7/IGHV1-69D/IGHV2-26/IGLC6/IGHV3-38/IGHV2-70D/IGHV3-11/IGHV2-70/IGHV3-73/IGHV1-45/IGHV1-3/IGHV3-66/IGHV4-28/IGHV3-43/IGHV3-64/IGHV3-13/IGHV1-58/IGH…
HP_ABNORMAL_CIRCULATING_CARBOHYDRATE_CONCENTRATION	HP_ABNORMAL_CIRCULATING_CARBOHYDRATE_CONCENTRATION	65	-0.72835	-1.69631	0.0333333	1	1	10	tags=5%, list=0%, signal=5%	PTPN22/COX6A2/MT-TI
HP_EXTERNAL_OPHTHALMOPLEGIA	HP_EXTERNAL_OPHTHALMOPLEGIA	66	-0.645804	-1.50574	0.0333333	1	1	4364	tags=9%, list=8%, signal=8%	MT-TH/MT-TN/MT-TT/MYF5/MT-TL2/MT-TQ
HP_PROXIMAL_TUBULOPATHY	HP_PROXIMAL_TUBULOPATHY	54	-0.717959	-1.63107	0.0333333	1	1	4804	tags=7%, list=8%, signal=7%	LRP2/MT-TH/SLC34A1/MT-TQ
HP_RAGGED_RED_MUSCLE_FIBERS	HP_RAGGED_RED_MUSCLE_FIBERS	55	-0.794617	-1.82842	0.0333333	1	1	1281	tags=9%, list=2%, signal=9%	MT-TH/MT-TN/MT-TL2/MT-TI/MT-TQ
HP_SENSORIMOTOR_NEUROPATHY	HP_SENSORIMOTOR_NEUROPATHY	80	-0.610742	-1.50928	0.0333333	1	1	4	tags=11%, list=0%, signal=11%	LAMA2/MT-TW/CLCF1/MT-TF/DHH/PIK3R5/GJB1/MT-TH/MT-TQ
GOBP_REGULATION_OF_CARDIAC_MUSCLE_CELL_ACTION_POTENTIAL	GOBP_REGULATION_OF_CARDIAC_MUSCLE_CELL_ACTION_POTENTIAL	27	0.746565	1.46015	0.0338983	1	1	382	tags=4%, list=1%, signal=4%	MIR208A
GOBP_T_CELL_CHEMOTAXIS	GOBP_T_CELL_CHEMOTAXIS	27	0.732953	1.43353	0.0338983	1	1	3849	tags=11%, list=7%, signal=10%	DEFA1/DEFA1B/CCL27
GOCC_IMMUNOGLOBULIN_COMPLEX	GOCC_IMMUNOGLOBULIN_COMPLEX	153	-0.831826	-2.33432	0.0344828	1	1	5032	tags=80%, list=9%, signal=73%	IGLV2-14/IGKV4-1/IGLV1-51/IGHA2/IGLV3-21/IGHV4-4/IGHV4-39/IGKV1-5/IGLV1-47/IGLV1-44/IGLV1-40/IGHV3-15/IGLV3-19/JCHAIN/IGLV3-1/IGHV4-61/IGLV4-3/IGHV3-30/IGLC7/IGHV3-74/IGHD/IGLV8-61/IGHV5-51/IGHV4-59/IGLV2-11/IGKV1-17/IGKV1-6/IGLV2-23/IGLV7-43/IGKV3-15/IGKV1-39/IGLV3-25/IGHV3-21/IGHV1-18/IGHV4-34/IGLV7-46/IGLV2-8/IGKV2-24/IGHV3-72/IGLV4-60/IGKV1-9/IGKV1-16/IGHV3-33/IGHV6-1/IGKV1-27/IGLL5/IGHV4-31/…
GOMF_ANTIGEN_BINDING	GOMF_ANTIGEN_BINDING	153	-0.778728	-2.18531	0.0344828	1	1	5363	tags=52%, list=9%, signal=47%	IGHV3-23/TRBV7-9/IGLV2-14/IGKV4-1/IGLV1-51/IGHA2/IGLV3-21/IGHV4-4/IGHV4-39/IGKV1-5/IGLV1-47/TRAV19/IGLV1-44/IGLV1-40/IGHV3-15/IGLV3-19/JCHAIN/IGLV3-1/IGHV4-61/IGHV3-30/IGLC7/IGHV3-74/IGHD/IGHV5-51/IGHV4-59/IGLV2-11/IGKV1-17/IGLV2-23/IGLV7-43/IGKV3-15/IGKV1-39/IGLV3-25/IGHV3-21/IGHV1-18/IGHV4-34/IGLV2-8/IGHV3-72/IGKV1-16/IGHV3-33/IGHV6-1/IGLL5/IGHV4-31/IGHV1OR15-1/IGHV3-48/IGHV2-5/IGHV1-69/IGKV1D-…
GOMF_TYPE_I_INTERFERON_RECEPTOR_BINDING	GOMF_TYPE_I_INTERFERON_RECEPTOR_BINDING	17	0.835563	1.49455	0.0350877	1	1	6420	tags=76%, list=11%, signal=68%	IFNA7/IFNA17/IFNA10/IFNA4/IFNA14/IFNA8/IFNK/IFNA1/IFNW1/IFNA5/IFNE/IFNA6/IFNB1
GOBP_NEGATIVE_REGULATION_OF_PHOSPHATIDYLINOSITOL_3_KINASE_SIGNALING	GOBP_NEGATIVE_REGULATION_OF_PHOSPHATIDYLINOSITOL_3_KINASE_SIGNALING	15	0.866049	1.50539	0.0357143	1	1	233	tags=7%, list=0%, signal=7%	MIR449A
HP_ABDOMINAL_OBESITY	HP_ABDOMINAL_OBESITY	21	0.765976	1.39548	0.0357143	1	1	101	tags=5%, list=0%, signal=5%	SNORD115-1
HP_NARROW_PALM	HP_NARROW_PALM	15	0.84424	1.46748	0.0357143	1	1	101	tags=7%, list=0%, signal=7%	SNORD115-1
GOBP_COMPLEMENT_ACTIVATION	GOBP_COMPLEMENT_ACTIVATION	167	-0.679736	-1.85597	0.04	1	1	5032	tags=53%, list=9%, signal=49%	CD5L/IGHV3-23/IGLV2-14/IGKV4-1/KRT1/IGLV1-51/C5AR2/IGHA2/IGLV3-21/IGHV4-4/IGHV4-39/IGKV1-5/IGLV1-47/IGLV1-44/C7/C4BPB/IGLV1-40/IGHV3-15/IGLV3-19/IGLV3-1/IGHV4-61/IGHV3-30/IGLC7/IGHV3-74/IGHD/IGHV5-51/IGHV4-59/IGLV2-11/IGKV1-17/IGLV2-23/IGLV7-43/IGKV3-15/IGKV1-39/IGLV3-25/IGHV3-21/IGHV1-18/IGHV4-34/IGLV2-8/IGHV3-72/IGKV1-16/CR1/IGHV3-33/IGHV6-1/IGLL5/C4BPA/IGHV4-31/IGHV1OR15-1/IGHV3-48/IGHV2-5/IGK…
GOBP_FC_EPSILON_RECEPTOR_SIGNALING_PATHWAY	GOBP_FC_EPSILON_RECEPTOR_SIGNALING_PATHWAY	168	-0.768728	-2.11374	0.04	1	1	6012	tags=32%, list=11%, signal=29%	IGKV3-20/ITK/IGHV3-23/IGLV2-14/IGKV4-1/FCER1A/IGLV1-51/IGLV3-21/IGHV4-39/IGKV1-5/IGLV1-47/IGLV1-44/IGLV1-40/IGLV3-19/IGLV3-1/IGHV3-30/IGLC7/IGHV4-59/IGLV2-11/IGKV1-17/IGLV2-23/IGLV7-43/IGKV3-15/IGKV1-39/IGLV3-25/IGHV4-34/MS4A2/IGLV2-8/IGKV1-16/IGHV3-33/IGHV1OR15-1/IGHV3-48/IGHV2-5/IGKV2-28/IGHV1-69/IGKV1-12/IGKV1D-39/IGKV2-30/IGHV3-53/IGHV3-7/IGLV6-57/IGLC6/IGKV3D-20/IGHV3-11/IGHV2-70/IGKV2-29/IG…
HP_ABNORMALITY_OF_THE_MITOCHONDRION	HP_ABNORMALITY_OF_THE_MITOCHONDRION	172	-0.533237	-1.47707	0.04	1	1	5079	tags=3%, list=9%, signal=3%	MMP1/MT-TH/MT-TN/SLC34A1/MT-TL2/MT-TQ
HP_LACTIC_ACIDOSIS	HP_LACTIC_ACIDOSIS	172	-0.513409	-1.42215	0.04	1	1	4364	tags=2%, list=8%, signal=2%	MT-TH/MT-TN/MT-TT/MT-TQ
HP_PIGMENTARY_RETINOPATHY	HP_PIGMENTARY_RETINOPATHY	160	-0.479595	-1.31137	0.04	1	1	4429	tags=4%, list=8%, signal=3%	CNGB1/MT-TH/MT-TN/AIRE/MFRP/MT-TQ
GOMF_OXIDOREDUCTASE_ACTIVITY_ACTING_ON_METAL_IONS	GOMF_OXIDOREDUCTASE_ACTIVITY_ACTING_ON_METAL_IONS	19	-0.763406	-1.45992	0.0416667	1	1	6782	tags=32%, list=12%, signal=28%	HEPH/CP/STEAP4/NOX5/FTMT/FTHL17
GOBP_REGULATION_OF_GLUCONEOGENESIS	GOBP_REGULATION_OF_GLUCONEOGENESIS	47	0.731185	1.55215	0.0422535	1	1	2238	tags=9%, list=4%, signal=8%	MIR107/MIR103A1/INS/GCG
GOBP_REGULATION_OF_GLUCOSE_METABOLIC_PROCESS	GOBP_REGULATION_OF_GLUCOSE_METABOLIC_PROCESS	119	0.592653	1.38324	0.0422535	1	1	2687	tags=6%, list=5%, signal=6%	MIR107/MIR103A1/FOXA2/PPP1R3A/INS/GCG/GCGR
GOBP_STEROID_HORMONE_MEDIATED_SIGNALING_PATHWAY	GOBP_STEROID_HORMONE_MEDIATED_SIGNALING_PATHWAY	134	0.579643	1.33447	0.0428571	1	1	2861	tags=4%, list=5%, signal=4%	DEFA1/DEFA1B/ISL1/TCF21/FOXA1/POU4F2
GOBP_REGULATION_OF_GLUCOSE_IMPORT	GOBP_REGULATION_OF_GLUCOSE_IMPORT	57	0.676926	1.42324	0.0434783	1	1	2861	tags=9%, list=5%, signal=8%	MIR107/MIR103A1/FGF19/INS/POU4F2
HP_PSYCHOTIC_MENTATION	HP_PSYCHOTIC_MENTATION	20	-0.816535	-1.56091	0.0434783	1	1	4	tags=10%, list=0%, signal=10%	MT-TH/MT-TQ
HP_WIDENED_CEREBRAL_SUBARACHNOID_SPACE	HP_WIDENED_CEREBRAL_SUBARACHNOID_SPACE	14	-0.833887	-1.46592	0.0434783	1	1	4	tags=14%, list=0%, signal=14%	MT-TH/MT-TQ
GOBP_POSITIVE_REGULATION_OF_GLUCOSE_METABOLIC_PROCESS	GOBP_POSITIVE_REGULATION_OF_GLUCOSE_METABOLIC_PROCESS	41	0.731165	1.50937	0.0441176	1	1	2238	tags=10%, list=4%, signal=9%	MIR107/MIR103A1/INS/GCG
GOMF_FERROUS_IRON_BINDING	GOMF_FERROUS_IRON_BINDING	26	-0.7093	-1.46692	0.0454545	1	1	3268	tags=19%, list=6%, signal=18%	TF/ACP5/HEPH/FTMT/FTHL17
HP_MYOCLONIC_SEIZURE	HP_MYOCLONIC_SEIZURE	177	-0.528387	-1.47182	0.0454545	1	1	10	tags=2%, list=0%, signal=2%	MT-TH/MT-TI/MT-TQ
GOBP_NATURAL_KILLER_CELL_ACTIVATION_INVOLVED_IN_IMMUNE_RESPONSE	GOBP_NATURAL_KILLER_CELL_ACTIVATION_INVOLVED_IN_IMMUNE_RESPONSE	31	0.739677	1.47642	0.046875	1	1	6420	tags=42%, list=11%, signal=37%	IFNA7/IFNA17/IFNA10/IFNA4/IFNA14/IFNA8/IFNK/IFNA1/IFNW1/IFNA5/IFNE/IFNA6/IFNB1
GOBP_NEGATIVE_REGULATION_OF_ANION_TRANSMEMBRANE_TRANSPORT	GOBP_NEGATIVE_REGULATION_OF_ANION_TRANSMEMBRANE_TRANSPORT	34	0.724122	1.46721	0.046875	1	1	1703	tags=6%, list=3%, signal=6%	MIR107/MIR103A1
GOBP_ANTIGEN_RECEPTOR_MEDIATED_SIGNALING_PATHWAY	GOBP_ANTIGEN_RECEPTOR_MEDIATED_SIGNALING_PATHWAY	307	-0.616661	-1.79848	0.047619	1	1	9560	tags=31%, list=17%, signal=26%	FYB1/CTLA4/SLA2/NCKAP1L/IGHM/IGHG2/CD79A/LAX1/MNDA/PTPRC/SYK/ICOSLG/GRAP2/PRAM1/BLNK/NFATC2/CD3G/IGHG3/IGLC3/HHLA2/SKAP1/SH2D1A/TEC/NFKBIZ/LCK/TXK/TRBV12-3/IGKC/CD28/PLCG2/TRBC1/KLHL6/THEMIS/PTPN22/FCGR2B/CD3D/IGHG1/IGLC2/MOG/IGHA1/ITK/IGHV3-23/TRBV7-9/CD226/CD22/IGHA2/IGHV4-4/IGHV4-39/BTNL3/TRAV19/IGHV3-15/IGHV4-61/IGHV3-30/IGLC7/IGHV3-74/IGHD/IGHV5-51/IGHV4-59/IGHV3-21/IGHV1-18/IGHV4-34/IGHV3-7…
GOBP_B_CELL_MEDIATED_IMMUNITY	GOBP_B_CELL_MEDIATED_IMMUNITY	215	-0.686639	-2.00022	0.047619	1	1	5363	tags=40%, list=9%, signal=37%	IGHV3-23/CD226/IGLV2-14/IGKV4-1/IGLV1-51/IGHA2/IGLV3-21/IGHV4-4/IGHV4-39/IGKV1-5/IGLV1-47/IGLV1-44/C7/C4BPB/IGLV1-40/IGHV3-15/IGLV3-19/IGLV3-1/IGHV4-61/IGHV3-30/IGLC7/IGHV3-74/IGHD/IGHV5-51/IGHV4-59/IGLV2-11/IGKV1-17/IGLV2-23/IGLV7-43/IGKV3-15/IGKV1-39/IGLV3-25/IGHV3-21/IGHV1-18/IGHV4-34/IGLV2-8/IGHV3-72/IGKV1-16/CR1/IGHV3-33/IGHV6-1/IGLL5/C4BPA/IGHV4-31/IGHV1OR15-1/IGHV3-48/IGHV2-5/IGKV2-28/IGHV…
GOBP_NEGATIVE_REGULATION_OF_CELLULAR_RESPONSE_TO_INSULIN_STIMULUS	GOBP_NEGATIVE_REGULATION_OF_CELLULAR_RESPONSE_TO_INSULIN_STIMULUS	39	0.734819	1.48375	0.047619	1	1	1703	tags=5%, list=3%, signal=5%	MIR107/MIR103A1
GOBP_REGULATION_OF_B_CELL_ACTIVATION	GOBP_REGULATION_OF_B_CELL_ACTIVATION	182	-0.684367	-1.91446	0.047619	1	1	7297	tags=40%, list=13%, signal=35%	NCKAP1L/CLCF1/IGHM/IGHG2/MNDA/PTPRC/SYK/IKZF3/NFATC2/BANK1/IGHG3/IGLC3/NOD2/IGKC/CD28/IL4/TRBC1/FCGR2B/IGHG1/IGLC2/IGHA1/IL10/IGHV3-23/CD22/IGHA2/IGHV4-4/IGHV4-39/IGHV3-15/IGHV4-61/IGHV3-30/IGLC7/IGHV3-74/IGHD/IGHV5-51/IGHV4-59/MZB1/IGHV3-21/IGHV1-18/IGHV4-34/IGHV3-72/CR1/IGHV3-33/IGHV6-1/IGLL5/IGHV4-31/IGHV1OR15-1/IGHV3-48/IGHV2-5/IGHV1-69/IGHV1-24/IGHV7-81/IGHV3-35/IGHV3-49/IGHV3-53/IGHV3-7/IGH…
HP_GENERALIZED_ONSET_MOTOR_SEIZURE	HP_GENERALIZED_ONSET_MOTOR_SEIZURE	191	-0.517338	-1.43534	0.047619	1	1	10	tags=2%, list=0%, signal=2%	MT-TH/MT-TI/MT-TQ
HP_INCREASED_SERUM_LACTATE	HP_INCREASED_SERUM_LACTATE	183	-0.66479	-1.86725	0.047619	1	1	1281	tags=3%, list=2%, signal=3%	MT-TH/MT-TN/MT-TL2/MT-TI/MT-TQ
GOBP_PHYSIOLOGICAL_CARDIAC_MUSCLE_HYPERTROPHY	GOBP_PHYSIOLOGICAL_CARDIAC_MUSCLE_HYPERTROPHY	29	0.72105	1.43165	0.0483871	1	1	1533	tags=7%, list=3%, signal=7%	MIR208A/AGTR2
GOBP_DEFENSE_RESPONSE_TO_VIRUS	GOBP_DEFENSE_RESPONSE_TO_VIRUS	260	0.517067	1.3112	0.0487805	1	1	6420	tags=7%, list=11%, signal=6%	IFNA7/DEFA1/DEFA1B/IFNA17/IFNA10/BPIFA1/IFNA4/IFNA14/IFNA8/IFNK/IFNA1/IFNG/APOBEC1/IFNW1/IFNA5/IFNE/IFNA6/IFNB1
HNSC
ID	Description	setSize	enrichmentScore	NES	pvalue	p.adjust	qvalues	rank	leading_edge	core_enrichment
GOBP_DETECTION_OF_CHEMICAL_STIMULUS	GOBP_DETECTION_OF_CHEMICAL_STIMULUS	495	0.518791	1.27612	0.00990099	1	1	9928	tags=39%, list=18%, signal=32%	OR5AC1/OR5M9/OR2T6/OR51G1/OR5H15/OR4P4/OR4C11/OR11H1/OR8D2/OR10R2/OR5L1/OR2AG1/OR4S2/OR10AG1/OR52E2/OR5I1/OR8B8/DRGX/OR10J4/OR4C13/OR52A5/OR11H2/OR10G7/OR5H2/OR5AR1/OR10K2/OR6Q1/OR8H1/OR5D14/OR51L1/OR4X2/OR7A17/OR6X1/OR4A8/OR8K5/OR7A10/OR5M3/OR4Q2/OR5A1/OR6C6/OR5M8/OR2T29/OR1N2/OR10K1/LINC02203/OR8D1/OR1N1/OR8K1/TAS2R39/OR52Z1/OR5AK2/OR14A2/OR5AS1/OR2V1/OR52K1/OR8U1/OR5D16/OR10A5/OR4A5/OR4C5/OR8G…
GOBP_POSITIVE_REGULATION_OF_TRANSLATION	GOBP_POSITIVE_REGULATION_OF_TRANSLATION	133	0.598185	1.39617	0.00990099	1	1	4798	tags=5%, list=8%, signal=5%	MIR15B/MIR346/DAZ1/DAZ3/DAZ4/BARHL2/ZCCHC13
GOBP_SENSORY_PERCEPTION_OF_SMELL	GOBP_SENSORY_PERCEPTION_OF_SMELL	441	0.540692	1.32682	0.00990099	1	1	10373	tags=43%, list=18%, signal=36%	OR5AC1/OR5M9/OR2T6/OR51G1/OR5H15/OR4P4/OR4C11/OR11H1/OR8D2/OR10R2/OR5L1/OR2AG1/OR4S2/OR10AG1/OR52E2/OR5I1/OR8B8/OR10J4/OR4C13/OR52A5/OR11H2/UGT2A1/OR10G7/OR5H2/OR5AR1/OR10K2/OR6Q1/OR8H1/OR5D14/OR51L1/GFY/OR4X2/OR7A17/OR6X1/OR4A8/OR8K5/OR7A10/OR5M3/OR4Q2/OR5A1/OR6C6/OR5M8/OR2T29/OR1N2/OR10K1/LINC02203/OR8D1/OBP2B/OR1N1/OR8K1/OR52Z1/OR5AK2/OR14A2/OR5AS1/OR2V1/SYT10/OR52K1/OR8U1/OR5D16/OR10A5/OR4A5/…
GOMF_OLFACTORY_RECEPTOR_ACTIVITY	GOMF_OLFACTORY_RECEPTOR_ACTIVITY	417	0.541717	1.32769	0.00990099	1	1	10373	tags=45%, list=18%, signal=37%	OR5AC1/OR5M9/OR2T6/OR51G1/OR5H15/OR4P4/OR4C11/OR11H1/OR8D2/OR10R2/OR5L1/OR2AG1/OR4S2/OR10AG1/OR52E2/OR5I1/OR8B8/OR10J4/OR4C13/OR52A5/OR11H2/OR10G7/OR5H2/OR5AR1/OR10K2/OR6Q1/OR8H1/OR5D14/OR51L1/OR4X2/OR7A17/OR6X1/OR4A8/OR8K5/OR7A10/OR5M3/OR4Q2/OR5A1/OR6C6/OR5M8/OR2T29/OR1N2/OR10K1/LINC02203/OR8D1/OR1N1/OR8K1/OR52Z1/OR5AK2/OR14A2/OR5AS1/OR2V1/OR52K1/OR8U1/OR5D16/OR10A5/OR4A5/OR4C5/OR8G3P/OR2V2/OR13…
GOMF_ODORANT_BINDING	GOMF_ODORANT_BINDING	114	0.661661	1.52871	0.01	1	1	7154	tags=50%, list=13%, signal=44%	OR5AC1/OR5M9/OR5H15/OR8D2/OR10R2/OR5L1/OR5I1/OR8B8/OR10J4/OR5H2/OR5AR1/OR10K2/OR8H1/OR5D14/OR8K5/OR5M3/OR5A1/OR5M8/OR10K1/OR8D1/OBP2B/OR8K1/OR5AK2/OR14A2/OR5AS1/OR8U1/OR5D16/OR8G3P/OR10T2/OR13G1/OR14A16/OR5L2/OR5J2/OR5W2/OR8J2/OR8J1/OR6B3/OR14C36/OR8J3/OR5AL1/OR5B12/OR5M10/OR10Z1/OR5K4/OR5AP2/OR10W1/OR5D18/OR8G5/OR5K3/OR5H14/OR5C1/OR8A1/OR10J1/OR8H2/OR4E1/OR4E2/OR5H1
GOBP_NEURON_FATE_COMMITMENT	GOBP_NEURON_FATE_COMMITMENT	59	0.653657	1.43587	0.0103093	1	1	10581	tags=41%, list=19%, signal=33%	FEZF2/GBX1/GSX1/GSX2/FOXN4/DBX1/TBR1/PTF1A/TLX3/DMRTA2/SHH/ISL1/FEV/POU4F1/MNX1/FOXG1/WNT1/OLIG3/ATOH1/POU3F2/FOXA1/LHX3/DMRT3/PAX6
GOBP_POSITIVE_REGULATION_OF_TRANSLATIONAL_INITIATION	GOBP_POSITIVE_REGULATION_OF_TRANSLATIONAL_INITIATION	30	0.771424	1.6089	0.0105263	1	1	1114	tags=10%, list=2%, signal=10%	DAZ1/DAZ3/DAZ4
GOBP_REGULATION_OF_AXON_GUIDANCE	GOBP_REGULATION_OF_AXON_GUIDANCE	14	0.809779	1.54477	0.010989	1	1	1533	tags=14%, list=3%, signal=14%	FEZF2/TBR1
GOBP_REGULATION_OF_VASCULAR_WOUND_HEALING	GOBP_REGULATION_OF_VASCULAR_WOUND_HEALING	11	0.845249	1.6041	0.010989	1	1	469	tags=9%, list=1%, signal=9%	MIR1298
GOMF_TRANSLATION_ACTIVATOR_ACTIVITY	GOMF_TRANSLATION_ACTIVATOR_ACTIVITY	14	0.831647	1.58648	0.010989	1	1	1114	tags=21%, list=2%, signal=21%	DAZ1/DAZ3/DAZ4
HP_WIDENED_CEREBRAL_SUBARACHNOID_SPACE	HP_WIDENED_CEREBRAL_SUBARACHNOID_SPACE	14	0.783089	1.49385	0.010989	1	1	577	tags=7%, list=1%, signal=7%	MT-TQ
GOBP_POSITIVE_REGULATION_OF_CHOLESTEROL_METABOLIC_PROCESS	GOBP_POSITIVE_REGULATION_OF_CHOLESTEROL_METABOLIC_PROCESS	10	0.827801	1.53641	0.0111111	1	1	279	tags=10%, list=0%, signal=10%	MIR96
GOBP_REGULATION_OF_TRANSLATIONAL_INITIATION	GOBP_REGULATION_OF_TRANSLATIONAL_INITIATION	80	0.609057	1.36453	0.020202	1	1	1114	tags=4%, list=2%, signal=4%	DAZ1/DAZ3/DAZ4
HP_PROGRESSIVE_SENSORINEURAL_HEARING_IMPAIRMENT	HP_PROGRESSIVE_SENSORINEURAL_HEARING_IMPAIRMENT	44	0.660638	1.41684	0.0206186	1	1	3364	tags=11%, list=6%, signal=11%	MIR96/MT-TQ/FGF3/MYO3A/P2RX2
GOBP_APOPTOTIC_PROCESS_INVOLVED_IN_DEVELOPMENT	GOBP_APOPTOTIC_PROCESS_INVOLVED_IN_DEVELOPMENT	35	0.65919	1.39103	0.0210526	1	1	5052	tags=17%, list=9%, signal=16%	XKR4/FGF4/XKR7/PAX2/XKR5/SIX3
HP_MITOCHONDRIAL_INHERITANCE	HP_MITOCHONDRIAL_INHERITANCE	30	0.684033	1.42663	0.0210526	1	1	577	tags=3%, list=1%, signal=3%	MT-TQ
GOBP_3_UTR_MEDIATED_MRNA_STABILIZATION	GOBP_3_UTR_MEDIATED_MRNA_STABILIZATION	24	0.743728	1.53383	0.0212766	1	1	1114	tags=12%, list=2%, signal=12%	DAZ1/DAZ3/DAZ4
GOBP_ANGIOGENESIS_INVOLVED_IN_WOUND_HEALING	GOBP_ANGIOGENESIS_INVOLVED_IN_WOUND_HEALING	27	0.680004	1.41801	0.0212766	1	1	469	tags=4%, list=1%, signal=4%	MIR1298
GOBP_NEURON_FATE_SPECIFICATION	GOBP_NEURON_FATE_SPECIFICATION	27	0.668411	1.39384	0.0212766	1	1	10247	tags=52%, list=18%, signal=42%	GSX2/DBX1/TLX3/DMRTA2/ISL1/FEV/POU4F1/MNX1/OLIG3/ATOH1/POU3F2/FOXA1/LHX3/DMRT3
HP_STROKE_LIKE_EPISODE	HP_STROKE_LIKE_EPISODE	24	0.694021	1.43131	0.0212766	1	1	577	tags=4%, list=1%, signal=4%	MT-TQ
GOBP_RESPONSE_TO_PLATELET_DERIVED_GROWTH_FACTOR	GOBP_RESPONSE_TO_PLATELET_DERIVED_GROWTH_FACTOR	21	0.745505	1.50082	0.0215054	1	1	469	tags=5%, list=1%, signal=5%	MIR1298
HP_FLUCTUATIONS_IN_CONSCIOUSNESS	HP_FLUCTUATIONS_IN_CONSCIOUSNESS	22	0.708036	1.43866	0.0215054	1	1	577	tags=5%, list=1%, signal=5%	MT-TQ
GOBP_NEGATIVE_REGULATION_OF_VASCULAR_ENDOTHELIAL_CELL_PROLIFERATION	GOBP_NEGATIVE_REGULATION_OF_VASCULAR_ENDOTHELIAL_CELL_PROLIFERATION	19	0.730003	1.45701	0.0217391	1	1	6230	tags=26%, list=11%, signal=23%	MIR15B/MIR132/MIR329-1/MIR487B/MIR30E
GOBP_VASCULAR_WOUND_HEALING	GOBP_VASCULAR_WOUND_HEALING	19	0.746642	1.49022	0.0217391	1	1	469	tags=5%, list=1%, signal=5%	MIR1298
HP_DISTAL_PERIPHERAL_SENSORY_NEUROPATHY	HP_DISTAL_PERIPHERAL_SENSORY_NEUROPATHY	19	0.744754	1.48645	0.0217391	1	1	577	tags=5%, list=1%, signal=5%	MT-TQ
GOBP_NEGATIVE_REGULATION_OF_METALLOPEPTIDASE_ACTIVITY	GOBP_NEGATIVE_REGULATION_OF_METALLOPEPTIDASE_ACTIVITY	10	0.793723	1.47316	0.0222222	1	1	328	tags=10%, list=1%, signal=10%	MIR892B
GOBP_REGULATION_OF_PEPTIDYL_CYSTEINE_S_NITROSYLATION	GOBP_REGULATION_OF_PEPTIDYL_CYSTEINE_S_NITROSYLATION	10	0.793326	1.47242	0.0222222	1	1	292	tags=10%, list=1%, signal=10%	MIR132
GOBP_TROPHOBLAST_CELL_MIGRATION	GOBP_TROPHOBLAST_CELL_MIGRATION	16	0.770079	1.48538	0.0222222	1	1	114	tags=6%, list=0%, signal=6%	MIR15B
GOMF_MRNA_3_UTR_BINDING	GOMF_MRNA_3_UTR_BINDING	138	0.552928	1.29186	0.029703	1	1	3153	tags=8%, list=6%, signal=8%	MIR15B/MIR183/MIR154/MIR1298/MIR105-1/DAZ1/DAZ3/DAZ4/MIR506/MIR153-1/MIR28
GOMF_MRNA_BINDING	GOMF_MRNA_BINDING	485	0.460124	1.13137	0.029703	1	1	11246	tags=17%, list=20%, signal=14%	MIR411/MIR654/MIR15B/MIR183/MIR520B/MIR154/MIR876/MIR96/MIR132/MIR552/MIR892B/MIR873/MIR1298/MIR105-1/MIR346/MIR488/DAZ1/DAZ3/MIR218-1/MIR520H/DAZ4/MIR301B/MIR373/MIR506/MIR1224/APOBEC1/MIR526A1/MIR153-1/MIR150/MIR33A/MIR28/CELF3/MIR204/MIR613/MIR518A1/LINC01783/MIR329-1/MIR199B/RBMXL3/ZCCHC13/MIR30A/MIR487B/BX284668.2/MIR519D/MIR520C/RBFOX3/NANOS2/MIR134/MIR758/MIR30E/ZAR1L/MIR588/MIR299/MIR409/…
GOMF_RNA_BINDING_INVOLVED_IN_POSTTRANSCRIPTIONAL_GENE_SILENCING	GOMF_RNA_BINDING_INVOLVED_IN_POSTTRANSCRIPTIONAL_GENE_SILENCING	192	0.517594	1.24029	0.029703	1	1	10467	tags=31%, list=19%, signal=26%	MIR411/MIR654/MIR15B/MIR183/MIR520B/MIR154/MIR876/MIR96/MIR132/MIR552/MIR892B/MIR873/MIR1298/MIR105-1/MIR488/MIR218-1/MIR520H/MIR301B/MIR373/MIR506/MIR1224/MIR526A1/MIR153-1/MIR150/MIR33A/MIR28/MIR204/MIR613/MIR518A1/MIR329-1/MIR199B/MIR30A/MIR487B/MIR519D/MIR520C/MIR134/MIR758/MIR30E/ZAR1L/MIR588/MIR299/MIR409/ZAR1/MIR181D/MIR188/MIR582/MIR520E/MIR149/MIR543/MIR298/MIR130A/MIR191/MIR548C/MIR920/…
HP_PROGRESSIVE_HEARING_IMPAIRMENT	HP_PROGRESSIVE_HEARING_IMPAIRMENT	52	0.636157	1.39235	0.0306122	1	1	3364	tags=10%, list=6%, signal=9%	MIR96/MT-TQ/FGF3/MYO3A/P2RX2
HP_HYPOPARATHYROIDISM	HP_HYPOPARATHYROIDISM	43	0.647044	1.39081	0.0309278	1	1	5364	tags=9%, list=9%, signal=8%	MT-TQ/PTH/AIRE/GCM2
HP_VITILIGO	HP_VITILIGO	31	0.653835	1.36616	0.0315789	1	1	5736	tags=10%, list=10%, signal=9%	MT-TQ/AIRE/FOXD3
GOBP_CELL_ADHESION_MOLECULE_PRODUCTION	GOBP_CELL_ADHESION_MOLECULE_PRODUCTION	23	0.699007	1.43005	0.0319149	1	1	5700	tags=17%, list=10%, signal=16%	MIR154/MIR1298/MIR506/MIR520C
GOBP_NEGATIVE_REGULATION_OF_NIK_NF_KAPPAB_SIGNALING	GOBP_NEGATIVE_REGULATION_OF_NIK_NF_KAPPAB_SIGNALING	33	0.672223	1.40912	0.0319149	1	1	3415	tags=9%, list=6%, signal=9%	MIR15B/MIR132/MIR204
GOBP_POSITIVE_REGULATION_OF_ALCOHOL_BIOSYNTHETIC_PROCESS	GOBP_POSITIVE_REGULATION_OF_ALCOHOL_BIOSYNTHETIC_PROCESS	23	0.694928	1.4217	0.0319149	1	1	1126	tags=9%, list=2%, signal=9%	MIR96/PTH
GOMF_MRNA_5_UTR_BINDING	GOMF_MRNA_5_UTR_BINDING	26	0.667516	1.38187	0.0322581	1	1	640	tags=4%, list=1%, signal=4%	MIR346
GOCC_RNA_CAP_BINDING_COMPLEX	GOCC_RNA_CAP_BINDING_COMPLEX	13	0.743931	1.40925	0.032967	1	1	1686	tags=8%, list=3%, signal=7%	EIF4E1B
HP_STUTTERING	HP_STUTTERING	18	0.723828	1.41265	0.032967	1	1	577	tags=6%, list=1%, signal=6%	MT-TQ
GOBP_REGULATION_OF_CONNECTIVE_TISSUE_REPLACEMENT	GOBP_REGULATION_OF_CONNECTIVE_TISSUE_REPLACEMENT	10	0.779341	1.44647	0.0333333	1	1	114	tags=10%, list=0%, signal=10%	MIR15B
HP_MIXED_DEMYELINATING_AND_AXONAL_POLYNEUROPATHY	HP_MIXED_DEMYELINATING_AND_AXONAL_POLYNEUROPATHY	15	0.776732	1.48045	0.0333333	1	1	577	tags=7%, list=1%, signal=7%	MT-TQ
GOBP_POSITIVE_REGULATION_OF_CELLULAR_AMIDE_METABOLIC_PROCESS	GOBP_POSITIVE_REGULATION_OF_CELLULAR_AMIDE_METABOLIC_PROCESS	163	0.510566	1.20798	0.039604	1	1	3045	tags=4%, list=5%, signal=3%	MIR15B/MIR346/DAZ1/DAZ3/DAZ4/BARHL2
GOBP_NEGATIVE_REGULATION_OF_MUSCLE_TISSUE_DEVELOPMENT	GOBP_NEGATIVE_REGULATION_OF_MUSCLE_TISSUE_DEVELOPMENT	11	0.748007	1.41956	0.043956	1	1	8191	tags=18%, list=14%, signal=16%	FGF3/FGF8
GOBP_TRIGEMINAL_NERVE_DEVELOPMENT	GOBP_TRIGEMINAL_NERVE_DEVELOPMENT	11	0.747245	1.41811	0.043956	1	1	7027	tags=36%, list=12%, signal=32%	DRGX/NEUROG1/ISL1/POU4F1
GOCC_MRNA_CAP_BINDING_COMPLEX	GOCC_MRNA_CAP_BINDING_COMPLEX	11	0.767369	1.4563	0.043956	1	1	1686	tags=9%, list=3%, signal=9%	EIF4E1B
GOMF_COMPLEMENT_RECEPTOR_ACTIVITY	GOMF_COMPLEMENT_RECEPTOR_ACTIVITY	12	0.760834	1.45969	0.043956	1	1	6821	tags=25%, list=12%, signal=22%	GPR32P1/GPR32/CR2
GOMF_RNA_7_METHYLGUANOSINE_CAP_BINDING	GOMF_RNA_7_METHYLGUANOSINE_CAP_BINDING	12	0.765196	1.46806	0.043956	1	1	1686	tags=8%, list=3%, signal=8%	EIF4E1B
GOBP_NEGATIVE_REGULATION_OF_NITRIC_OXIDE_METABOLIC_PROCESS	GOBP_NEGATIVE_REGULATION_OF_NITRIC_OXIDE_METABOLIC_PROCESS	17	0.720454	1.39971	0.0444444	1	1	292	tags=6%, list=1%, signal=6%	MIR132
KICH
ID	Description	setSize	enrichmentScore	NES	pvalue	p.adjust	qvalues	rank	leading_edge	core_enrichment
GOCC_RESPIRATORY_CHAIN_COMPLEX	GOCC_RESPIRATORY_CHAIN_COMPLEX	87	0.675221	1.42104	0.0114943	1	1	8	tags=1%, list=0%, signal=1%	COX7B2
GOMF_HEME_COPPER_TERMINAL_OXIDASE_ACTIVITY	GOMF_HEME_COPPER_TERMINAL_OXIDASE_ACTIVITY	28	0.82521	1.45285	0.0128205	1	1	8	tags=4%, list=0%, signal=4%	COX7B2
GOBP_LATE_ENDOSOME_TO_VACUOLE_TRANSPORT	GOBP_LATE_ENDOSOME_TO_VACUOLE_TRANSPORT	25	0.803091	1.39111	0.0131579	1	1	1553	tags=4%, list=3%, signal=4%	BECN2
GOBP_MEMBRANE_RAFT_ORGANIZATION	GOBP_MEMBRANE_RAFT_ORGANIZATION	25	0.804258	1.39313	0.0131579	1	1	178	tags=4%, list=0%, signal=4%	MIR138-1
GOBP_REGULATION_OF_PROTEIN_POLYUBIQUITINATION	GOBP_REGULATION_OF_PROTEIN_POLYUBIQUITINATION	25	0.801165	1.38778	0.0131579	1	1	178	tags=4%, list=0%, signal=4%	MIR138-1
GOCC_RNAI_EFFECTOR_COMPLEX	GOCC_RNAI_EFFECTOR_COMPLEX	16	0.885927	1.45207	0.0133333	1	1	597	tags=6%, list=1%, signal=6%	MIR31
GOBP_REGULATION_OF_PROTEIN_K63_LINKED_UBIQUITINATION	GOBP_REGULATION_OF_PROTEIN_K63_LINKED_UBIQUITINATION	13	0.898832	1.40717	0.0136986	1	1	178	tags=8%, list=0%, signal=8%	MIR138-1
GOBP_MEMBRANE_RAFT_ASSEMBLY	GOBP_MEMBRANE_RAFT_ASSEMBLY	11	0.952712	1.46282	0.0138889	1	1	178	tags=9%, list=0%, signal=9%	MIR138-1
GOBP_NEGATIVE_REGULATION_OF_PROTEIN_POLYUBIQUITINATION	GOBP_NEGATIVE_REGULATION_OF_PROTEIN_POLYUBIQUITINATION	11	0.915631	1.40589	0.0138889	1	1	178	tags=9%, list=0%, signal=9%	MIR138-1
GOBP_REGULATION_OF_CELLULAR_CARBOHYDRATE_CATABOLIC_PROCESS	GOBP_REGULATION_OF_CELLULAR_CARBOHYDRATE_CATABOLIC_PROCESS	12	0.910566	1.40638	0.0142857	1	1	1645	tags=8%, list=3%, signal=8%	INS
GOCC_RESPIRASOME	GOCC_RESPIRASOME	103	0.645412	1.37904	0.0224719	1	1	8	tags=1%, list=0%, signal=1%	COX7B2
GOBP_CARDIAC_MUSCLE_CELL_PROLIFERATION	GOBP_CARDIAC_MUSCLE_CELL_PROLIFERATION	57	0.700092	1.42069	0.0232558	1	1	4967	tags=12%, list=9%, signal=11%	MIR199B/MIR204/MIR548C/TBX20/KCNK2/TBX5/BMP10
GOBP_REGULATION_OF_CARDIAC_MUSCLE_CELL_PROLIFERATION	GOBP_REGULATION_OF_CARDIAC_MUSCLE_CELL_PROLIFERATION	48	0.736756	1.43953	0.0240964	1	1	9741	tags=25%, list=17%, signal=21%	MIR199B/MIR204/MIR548C/TBX20/KCNK2/TBX5/BMP10/WNT2/MIR199A1/GATA6/TP73/GLI1
GOBP_REGULATION_OF_PROTEIN_AUTOPHOSPHORYLATION	GOBP_REGULATION_OF_PROTEIN_AUTOPHOSPHORYLATION	47	0.736454	1.4436	0.0243902	1	1	4215	tags=9%, list=7%, signal=8%	INS/ADIPOQ/GREM1/EPHA7
GOBP_REGULATION_OF_OXIDATIVE_STRESS_INDUCED_INTRINSIC_APOPTOTIC_SIGNALING_PATHWAY	GOBP_REGULATION_OF_OXIDATIVE_STRESS_INDUCED_INTRINSIC_APOPTOTIC_SIGNALING_PATHWAY	28	0.788025	1.38739	0.025641	1	1	1645	tags=4%, list=3%, signal=3%	INS
GOBP_NEGATIVE_REGULATION_OF_OXIDATIVE_STRESS_INDUCED_INTRINSIC_APOPTOTIC_SIGNALING_PATHWAY	GOBP_NEGATIVE_REGULATION_OF_OXIDATIVE_STRESS_INDUCED_INTRINSIC_APOPTOTIC_SIGNALING_PATHWAY	20	0.828533	1.41155	0.0277778	1	1	1645	tags=5%, list=3%, signal=5%	INS
GOBP_POSITIVE_REGULATION_OF_VASCULAR_ENDOTHELIAL_CELL_PROLIFERATION	GOBP_POSITIVE_REGULATION_OF_VASCULAR_ENDOTHELIAL_CELL_PROLIFERATION	22	-0.730104	-1.52906	0.03125	1	1	385	tags=41%, list=1%, signal=41%	ITGA4/IGF2/MIR27A/MDK/GHSR/MIR130A/MIR135B/GHRL/MIR132
GOBP_REGULATION_OF_DEACETYLASE_ACTIVITY	GOBP_REGULATION_OF_DEACETYLASE_ACTIVITY	12	-0.902121	-1.5379	0.03125	1	1	31	tags=17%, list=0%, signal=17%	LRRK2/MIR182
GOBP_POSITIVE_REGULATION_OF_FATTY_ACID_BIOSYNTHETIC_PROCESS	GOBP_POSITIVE_REGULATION_OF_FATTY_ACID_BIOSYNTHETIC_PROCESS	23	-0.789034	-1.63369	0.0333333	1	1	31	tags=9%, list=0%, signal=9%	AVP/MIR182
GOBP_POSITIVE_REGULATION_OF_TRIGLYCERIDE_LIPASE_ACTIVITY	GOBP_POSITIVE_REGULATION_OF_TRIGLYCERIDE_LIPASE_ACTIVITY	11	-0.88267	-1.42672	0.0333333	1	1	1855	tags=36%, list=3%, signal=35%	APOH/GPIHBP1/PNLIP/MIR182
GOCC_MHC_PROTEIN_COMPLEX	GOCC_MHC_PROTEIN_COMPLEX	23	-0.702803	-1.45515	0.0333333	1	1	14986	tags=87%, list=27%, signal=64%	HLA-C/HLA-DRB1/HLA-B/HLA-DRA/HLA-A/HLA-H/HLA-E/HLA-DPA1/MR1/HLA-DRB5/HLA-DPB1/HLA-DMA/HLA-DQB1/HLA-DMB/HLA-F/HLA-DQA2/HLA-DOA/HLA-DQA1/HLA-DQB2/HLA-DOB
GOBP_NEGATIVE_REGULATION_OF_RESPONSE_TO_OXIDATIVE_STRESS	GOBP_NEGATIVE_REGULATION_OF_RESPONSE_TO_OXIDATIVE_STRESS	21	-0.797493	-1.58767	0.0344828	1	1	385	tags=10%, list=1%, signal=9%	LRRK2/MIR132
GOBP_POSITIVE_REGULATION_OF_ENDOTHELIAL_CELL_APOPTOTIC_PROCESS	GOBP_POSITIVE_REGULATION_OF_ENDOTHELIAL_CELL_APOPTOTIC_PROCESS	21	-0.748793	-1.49072	0.0344828	1	1	6718	tags=29%, list=12%, signal=25%	AKR1C3/CD160/GPER1/FASLG/CD40LG/MIR132
GOMF_CYSTEINE_TYPE_ENDOPEPTIDASE_INHIBITOR_ACTIVITY	GOMF_CYSTEINE_TYPE_ENDOPEPTIDASE_INHIBITOR_ACTIVITY	56	0.694649	1.41129	0.0344828	1	1	4173	tags=12%, list=7%, signal=12%	CARD18/CSTL1/CST9L/CSN2/CST9/FETUB/HRG
GOMF_RNA_POLYMERASE_CORE_ENZYME_BINDING	GOMF_RNA_POLYMERASE_CORE_ENZYME_BINDING	56	0.68487	1.39142	0.0344828	1	1	6552	tags=7%, list=12%, signal=6%	MIR139/MIR584/MIR33A/ESRRB
GOBP_REGULATION_OF_HEART_GROWTH	GOBP_REGULATION_OF_HEART_GROWTH	75	0.670932	1.38106	0.0348837	1	1	9741	tags=19%, list=17%, signal=15%	MIR199B/MIR204/MIR548C/TBX20/KCNK2/WT1/TBX5/BMP10/MYH6/WNT2/MIR199A1/GATA6/TP73/GLI1
GOBP_POSITIVE_REGULATION_OF_HEART_GROWTH	GOBP_POSITIVE_REGULATION_OF_HEART_GROWTH	42	0.709062	1.35336	0.0361446	1	1	9741	tags=24%, list=17%, signal=20%	MIR204/MIR548C/TBX20/WT1/TBX5/BMP10/WNT2/MIR199A1/GATA6/GLI1
GOBP_CELLULAR_RESPONSE_TO_CHOLESTEROL	GOBP_CELLULAR_RESPONSE_TO_CHOLESTEROL	19	-0.763508	-1.45312	0.037037	1	1	31	tags=21%, list=0%, signal=21%	CYP7A1/GRAMD1B/CES1/MIR182
GOBP_ACTIVATION_OF_PROTEIN_KINASE_B_ACTIVITY	GOBP_ACTIVATION_OF_PROTEIN_KINASE_B_ACTIVITY	33	0.753	1.39457	0.0384615	1	1	1645	tags=6%, list=3%, signal=6%	DYNAP/INS
GOBP_NEGATIVE_REGULATION_OF_NITRIC_OXIDE_METABOLIC_PROCESS	GOBP_NEGATIVE_REGULATION_OF_NITRIC_OXIDE_METABOLIC_PROCESS	17	-0.803061	-1.54611	0.0384615	1	1	385	tags=12%, list=1%, signal=12%	CD34/MIR132
GOBP_POLYOL_CATABOLIC_PROCESS	GOBP_POLYOL_CATABOLIC_PROCESS	25	-0.730688	-1.51533	0.0384615	1	1	1142	tags=8%, list=2%, signal=8%	NTSR1/GK2
GOBP_POSITIVE_REGULATION_OF_PROTEIN_LOCALIZATION_TO_CELL_SURFACE	GOBP_POSITIVE_REGULATION_OF_PROTEIN_LOCALIZATION_TO_CELL_SURFACE	18	-0.794919	-1.46554	0.0384615	1	1	244	tags=17%, list=0%, signal=17%	CD247/TNF/MIR520E
GOBP_POSITIVE_REGULATION_OF_UBIQUITIN_PROTEIN_TRANSFERASE_ACTIVITY	GOBP_POSITIVE_REGULATION_OF_UBIQUITIN_PROTEIN_TRANSFERASE_ACTIVITY	34	0.735972	1.36478	0.0384615	1	1	2236	tags=6%, list=4%, signal=6%	MAGEC2/MAGEA2
GOBP_REGULATION_OF_LIPOPOLYSACCHARIDE_MEDIATED_SIGNALING_PATHWAY	GOBP_REGULATION_OF_LIPOPOLYSACCHARIDE_MEDIATED_SIGNALING_PATHWAY	25	-0.730345	-1.51462	0.0384615	1	1	10084	tags=40%, list=18%, signal=33%	CD36/LY96/LILRA2/LY86/SCIMP/CX3CL1/CD180/BMP6/ACOD1/LACRT
GOCC_LAMELLAR_BODY	GOCC_LAMELLAR_BODY	17	-0.750958	-1.4458	0.0384615	1	1	9895	tags=53%, list=18%, signal=44%	SPINK5/ABCA12/SFTA3/SFTPB/SFTPA1/KLK5/KLK7/SFTPA2/SFTPC
GOMF_GLUTATHIONE_TRANSFERASE_ACTIVITY	GOMF_GLUTATHIONE_TRANSFERASE_ACTIVITY	25	-0.697298	-1.44609	0.0384615	1	1	9312	tags=36%, list=16%, signal=30%	HPGDS/GSTA3/GSTT2B/GSTT4/GSTA1/PTGES/GSTA2/GSTM5/GSTA5
GOBP_POSITIVE_REGULATION_OF_PROTEIN_AUTOPHOSPHORYLATION	GOBP_POSITIVE_REGULATION_OF_PROTEIN_AUTOPHOSPHORYLATION	27	0.762724	1.34687	0.038961	1	1	3875	tags=7%, list=7%, signal=7%	INS/GREM1
GOBP_PROTEIN_DNA_COMPLEX_DISASSEMBLY	GOBP_PROTEIN_DNA_COMPLEX_DISASSEMBLY	20	0.800143	1.36318	0.0416667	1	1	4531	tags=10%, list=8%, signal=9%	H2BC1/TNP1
GOBP_REGULATION_OF_HISTONE_DEACETYLATION	GOBP_REGULATION_OF_HISTONE_DEACETYLATION	28	-0.714499	-1.49775	0.0416667	1	1	31	tags=7%, list=0%, signal=7%	LRRK2/MIR182
GOCC_MYOSIN_FILAMENT	GOCC_MYOSIN_FILAMENT	22	0.807194	1.35591	0.0428571	1	1	5931	tags=32%, list=10%, signal=28%	MYH1/MYH13/MYH2/MYH4/MYH8/MYBPH/MYH6
GOCC_RESPIRATORY_CHAIN_COMPLEX_IV	GOCC_RESPIRATORY_CHAIN_COMPLEX_IV	22	0.80755	1.35651	0.0428571	1	1	8	tags=5%, list=0%, signal=5%	COX7B2
GOBP_NEGATIVE_REGULATION_OF_CYSTEINE_TYPE_ENDOPEPTIDASE_ACTIVITY	GOBP_NEGATIVE_REGULATION_OF_CYSTEINE_TYPE_ENDOPEPTIDASE_ACTIVITY	78	0.63931	1.32629	0.0454545	1	1	2598	tags=4%, list=5%, signal=4%	CARD18/MAGEA3/CSN2
GOBP_STRIATED_MUSCLE_CELL_PROLIFERATION	GOBP_STRIATED_MUSCLE_CELL_PROLIFERATION	71	0.656714	1.34482	0.047619	1	1	11804	tags=24%, list=21%, signal=19%	MIR199B/MIR204/MIR548C/TBX20/KCNK2/TBX5/BMP10/WNT2/MIR199A1/GATA6/TP73/MEGF10/GLI1/SIX1/EPHB1/MSTN/MIR200B
KIRC
ID	Description	setSize	enrichmentScore	NES	pvalue	p.adjust	qvalues	rank	leading_edge	core_enrichment
GOBP_DETECTION_OF_CHEMICAL_STIMULUS	GOBP_DETECTION_OF_CHEMICAL_STIMULUS	495	0.584589	1.35222	0.00990099	1	1	9322	tags=40%, list=16%, signal=34%	OR5AR1/OR5AL1/OR6C74/OR8B4/NKX6-1/OR52E6/OR5M10/OR5H2/OR4M2/OR4M1/OR10A6/OR2M3/OR10R2/OR51T1/OR5A2/OR4D10/OR56A1/OR51D1/OR2Z1/OR51L1/OR6C68/OR5M11/OR2B3/OR52E5/OR52A1/OR2G2/OR2M7/OR8K1/OR5AC2/OR5AU1/OR1B1/OR10J4/PDX1/CST4/OR5F1/OR4C6/OR5D14/OR12D3/OR4A8/OR1A2/OR2F2/OR6B2/OR6C76/OR14J1/OR5L1/OR10G3/GPR148/OR4C5/OR5T2/OR5L2/OR1N1/OR56A3/OR10J5/OR11H12/OR6N2/OR8B12/OR4K13/OR5W2/OR10D3/OR14A16/OR52J3…
GOBP_EPIDERMAL_CELL_DIFFERENTIATION	GOBP_EPIDERMAL_CELL_DIFFERENTIATION	357	0.581517	1.33117	0.00990099	1	1	11650	tags=35%, list=21%, signal=28%	KRTAP12-2/LCE3C/KRTAP24-1/KRTAP5-3/KRTAP23-1/KRTAP19-6/KRTAP6-3/KRTAP12-1/KRTAP9-4/KRTAP26-1/GRXCR1/SPRR4/KRTAP2-1/KRTAP5-2/KRTAP1-4/KRTAP9-8/KRTAP12-3/KRTAP25-1/SPRR2B/KRTAP4-1/KRTAP19-7/KRTAP19-2/KRTAP6-1/KRTAP9-9/LCE2B/KRTAP3-3/KRT26/LCE2C/KRTAP27-1/LCE3E/KRTAP10-10/KRTAP1-3/SPRR2E/KRT35/KRTAP10-12/KRTAP2-4/KRTAP10-8/KRTAP10-6/SPRR2D/KRT25/KRTAP12-4/RPTN/LCE3A/KRTAP5-8/KRTAP13-4/GRHL2/SERPINB1…
GOBP_EPIDERMIS_DEVELOPMENT	GOBP_EPIDERMIS_DEVELOPMENT	459	0.561225	1.30322	0.00990099	1	1	13134	tags=33%, list=23%, signal=25%	KRTAP12-2/LCE3C/KRTAP24-1/KRTAP5-3/KRTAP23-1/KRTAP19-6/KRTAP6-3/KRTAP12-1/KRTAP9-4/KRTAP26-1/GRXCR1/SPRR4/KRTAP2-1/KRTAP5-2/KRTAP1-4/KRTAP9-8/KRTAP12-3/KRTAP25-1/SPRR2B/KRTAP4-1/KRTAP19-7/KRTAP19-2/KRTAP6-1/KRTAP9-9/LCE2B/KRTAP3-3/KRT26/LCE2C/KRTAP27-1/LCE3E/KRTAP10-10/KRTAP1-3/SPRR2E/KRT35/KRTAP10-12/KRTAP2-4/KRTAP10-8/KRTAP10-6/SPRR2D/KRT25/KRTAP12-4/FOXE1/RPTN/LCE3A/KRTAP5-8/KRTAP13-4/GRHL2/SE…
GOBP_KERATINIZATION	GOBP_KERATINIZATION	222	0.616821	1.40888	0.00990099	1	1	11650	tags=49%, list=21%, signal=39%	KRTAP12-2/LCE3C/KRTAP24-1/KRTAP5-3/KRTAP23-1/KRTAP19-6/KRTAP6-3/KRTAP12-1/KRTAP9-4/KRTAP26-1/SPRR4/KRTAP2-1/KRTAP5-2/KRTAP1-4/KRTAP9-8/KRTAP12-3/KRTAP25-1/SPRR2B/KRTAP4-1/KRTAP19-7/KRTAP19-2/KRTAP6-1/KRTAP9-9/LCE2B/KRTAP3-3/KRT26/LCE2C/KRTAP27-1/LCE3E/KRTAP10-10/KRTAP1-3/SPRR2E/KRT35/KRTAP10-12/KRTAP2-4/KRTAP10-8/KRTAP10-6/SPRR2D/KRT25/KRTAP12-4/RPTN/LCE3A/KRTAP5-8/KRTAP13-4/KRT39/LCE2A/LCE6A/KRT…
GOBP_KERATINOCYTE_DIFFERENTIATION	GOBP_KERATINOCYTE_DIFFERENTIATION	299	0.600902	1.38265	0.00990099	1	1	11650	tags=40%, list=21%, signal=32%	KRTAP12-2/LCE3C/KRTAP24-1/KRTAP5-3/KRTAP23-1/KRTAP19-6/KRTAP6-3/KRTAP12-1/KRTAP9-4/KRTAP26-1/SPRR4/KRTAP2-1/KRTAP5-2/KRTAP1-4/KRTAP9-8/KRTAP12-3/KRTAP25-1/SPRR2B/KRTAP4-1/KRTAP19-7/KRTAP19-2/KRTAP6-1/KRTAP9-9/LCE2B/KRTAP3-3/KRT26/LCE2C/KRTAP27-1/LCE3E/KRTAP10-10/KRTAP1-3/SPRR2E/KRT35/KRTAP10-12/KRTAP2-4/KRTAP10-8/KRTAP10-6/SPRR2D/KRT25/KRTAP12-4/RPTN/LCE3A/KRTAP5-8/KRTAP13-4/GRHL2/SERPINB13/KRT39…
GOBP_SENSORY_PERCEPTION_OF_SMELL	GOBP_SENSORY_PERCEPTION_OF_SMELL	441	0.597921	1.38548	0.00990099	1	1	9322	tags=44%, list=16%, signal=37%	OR5AR1/OR5AL1/OR6C74/OR8B4/OR52E6/OR5M10/OR5H2/OR4M2/OR4M1/OR10A6/OR2M3/OR10R2/OR51T1/OR5A2/OR4D10/OR56A1/OR51D1/OR2Z1/OR51L1/OR6C68/OR5M11/OR2B3/OR52E5/OR52A1/OR2G2/OR2M7/OR8K1/OR5AC2/OR5AU1/OR1B1/OR10J4/OR5F1/OR4C6/OR5D14/OR12D3/OR4A8/OR1A2/OR2F2/OR6B2/CNGB1/OR6C76/OR14J1/OR5L1/OR10G3/GPR148/OR4C5/OR5T2/OR5L2/OR1N1/SYT10/OR56A3/OR10J5/OR11H12/OR6N2/OR8B12/OR4K13/OR5W2/OR10D3/OR14A16/OR52J3/OR4C…
GOBP_SKIN_DEVELOPMENT	GOBP_SKIN_DEVELOPMENT	412	0.568289	1.30755	0.00990099	1	1	12798	tags=33%, list=23%, signal=26%	KRTAP12-2/LCE3C/KRTAP24-1/KRTAP5-3/KRTAP23-1/KRTAP19-6/KRTAP6-3/KRTAP12-1/KRTAP9-4/KRTAP26-1/SPRR4/KRTAP2-1/KRTAP5-2/KRTAP1-4/KRTAP9-8/KRTAP12-3/KRTAP25-1/SPRR2B/KRTAP4-1/KRTAP19-7/KRTAP19-2/KRTAP6-1/KRTAP9-9/LCE2B/ASCL4/KRTAP3-3/KRT26/LCE2C/KRTAP27-1/LCE3E/KRTAP10-10/KRTAP1-3/SPRR2E/KRT35/KRTAP10-12/KRTAP2-4/KRTAP10-8/KRTAP10-6/SPRR2D/KRT25/KRTAP12-4/FOXE1/RPTN/LCE3A/KRTAP5-8/KRTAP13-4/GRHL2/SER…
GOCC_INTERMEDIATE_FILAMENT_CYTOSKELETON	GOCC_INTERMEDIATE_FILAMENT_CYTOSKELETON	244	0.623651	1.44047	0.00990099	1	1	11650	tags=36%, list=21%, signal=28%	KRTAP12-2/KRTAP24-1/KRTAP5-3/KRTAP23-1/KRTAP19-6/KRTAP6-3/KRTAP12-1/KRTAP9-4/KRTAP26-1/KRTAP2-1/KRTAP5-2/KRTAP1-4/KRTAP9-8/KRTAP12-3/KRTAP25-1/KRTAP4-1/KRTAP19-7/KRTAP19-2/KRTAP6-1/KRTAP9-9/KRTAP3-3/KRT26/KRTAP27-1/KRTAP10-10/KRTAP1-3/KRT35/KRTAP10-12/KRTAP2-4/KRTAP10-8/KRTAP10-6/KRT25/KRTAP12-4/SLC1A6/KRTAP5-8/KRTAP13-4/KRT39/LMNTD1/KRTAP22-2/KRT6C/KRTAP21-3/KRTAP10-7/KRTAP22-1/KRTAP13-2/KRTAP9-…
GOCC_PLASMA_MEMBRANE_SIGNALING_RECEPTOR_COMPLEX	GOCC_PLASMA_MEMBRANE_SIGNALING_RECEPTOR_COMPLEX	301	0.548298	1.25991	0.00990099	1	1	16556	tags=45%, list=29%, signal=32%	TRDD1/HTR3B/CHRNA9/TRAV9-1/GRIA2/GRIN1/CACNG3/GRID2/GRM1/INSRR/BMPR1B/HTR3A/OLFM3/CHRNB3/TRBV11-1/TRGV8/TRAV7/TRAV18/TRBV7-4/TRBV27/TRAV40/TRBV10-1/CACNG7/CACNG2/TRBV5-5/TRAV34/TRAV24/TRBV6-7/TRAV38-1/TRAV35/VWC2/TRAV10/TRBV4-2/TRBV13/TRAV26-2/ACVR1C/TRAV8-1/TRBV12-3/CHRNB2/TRAV1-2/TRBV6-6/TRAV1-1/TRAV19/TRAV8-6/TRBV12-5/TRBV10-2/TRAV6/TRAV5/TRAV21/TRBV24-1/TRBV7-1/TRBV6-4/TRBV12-4/TRAV36DV7/TRAJ…
GOMF_OLFACTORY_RECEPTOR_ACTIVITY	GOMF_OLFACTORY_RECEPTOR_ACTIVITY	417	0.601748	1.38563	0.00990099	1	1	9322	tags=46%, list=16%, signal=39%	OR5AR1/OR5AL1/OR6C74/OR8B4/OR52E6/OR5M10/OR5H2/OR4M2/OR4M1/OR10A6/OR2M3/OR10R2/OR51T1/OR5A2/OR4D10/OR56A1/OR51D1/OR2Z1/OR51L1/OR6C68/OR5M11/OR2B3/OR52E5/OR52A1/OR2G2/OR2M7/OR8K1/OR5AC2/OR5AU1/OR1B1/OR10J4/OR5F1/OR4C6/OR5D14/OR12D3/OR4A8/OR1A2/OR2F2/OR6B2/OR6C76/OR14J1/OR5L1/OR10G3/GPR148/OR4C5/OR5T2/OR5L2/OR1N1/OR56A3/OR10J5/OR11H12/OR6N2/OR8B12/OR4K13/OR5W2/OR10D3/OR14A16/OR52J3/OR4C12/OR4A5/OR1…
GOBP_HUMORAL_IMMUNE_RESPONSE_MEDIATED_BY_CIRCULATING_IMMUNOGLOBULIN	GOBP_HUMORAL_IMMUNE_RESPONSE_MEDIATED_BY_CIRCULATING_IMMUNOGLOBULIN	145	0.593528	1.32884	0.01	1	1	19657	tags=71%, list=35%, signal=46%	IGKV2-40/IGKV2D-28/IGHV1OR15-1/C4BPB/IGKV2-28/IGKV1D-33/IGKV1D-39/C8B/C8A/IGKV1-39/IGLC6/IGKV1D-12/EXO1/IGLL1/IGKV2D-30/C4BPA/IGHV1-3/IGHV3-64/IGKV5-2/IGHV4-4/IGHV3-16/IGHV3-20/IGHV6-1/IGHV3-35/IGHV1-45/IGHV7-81/IGHV3-38/FOXJ1/IGKV2-30/IGHV3-43/IGKV1-12/IGHV4-28/IGHV2-70D/IGHV1-58/IGHV2-70/IGHV3-7/IGKV3D-11/IGHV3-66/IGHV1-69/IGLV3-27/IGHV4-61/LTA/IGHV2-26/CR2/IGHV3-13/IGLC7/IGHV4-31/IGHV2-5/CR1/I…
GOBP_RESPONSE_TO_DOPAMINE	GOBP_RESPONSE_TO_DOPAMINE	89	0.6568	1.49527	0.01	1	1	7708	tags=24%, list=14%, signal=20%	HTR3B/OR5T2/OR10J5/CHRM1/OR10H3/HTR3D/HTR1E/OR10H4/RGS8/HTR3E/OR10H2/HTR5A/HTR3C/HTR2C/CALY/DRD2/OR10H5/HTR3A/HTR1D/DRD3/CHRM2
GOBP_RNA_3_END_PROCESSING	GOBP_RNA_3_END_PROCESSING	153	0.636642	1.44031	0.01	1	1	9991	tags=7%, list=18%, signal=6%	CT45A9/CT45A7/LIN28B/CT45A6/LIN28A/SAGE2P/CT45A8/CT45A10/SAGE1/CT45A3/CT45A5
GOCC_IMMUNOGLOBULIN_COMPLEX	GOCC_IMMUNOGLOBULIN_COMPLEX	153	0.634221	1.43484	0.01	1	1	19657	tags=90%, list=35%, signal=59%	IGKV2-40/IGKV2D-28/IGKV1-37/IGHV1OR15-1/IGKV2-28/IGKV1D-37/IGHD1-1/IGKV1D-33/IGKV1D-39/IGKV6D-41/IGLV3-16/IGKV1-13/IGKV3D-7/IGKV1-39/IGKV1D-43/IGLV2-33/IGLC6/IGLV5-48/IGLJ1/IGKV1D-12/IGLL1/IGLV5-37/IGKV2D-30/IGHV1-3/IGHJ1/IGKV1D-17/IGHV3-64/IGKV5-2/IGKV3-7/IGKV1-8/IGLV1-50/IGHV8-51-1/IGHV4-4/IGHV3-16/IGHV3-20/IGKV6D-21/IGLV11-55/IGHV6-1/IGHV3-35/IGKV2D-24/IGKV2D-26/IGHV1-45/IGKV1D-8/IGKV3D-15/IGH…
GOCC_INTERMEDIATE_FILAMENT	GOCC_INTERMEDIATE_FILAMENT	203	0.635276	1.44331	0.01	1	1	11650	tags=42%, list=21%, signal=34%	KRTAP12-2/KRTAP24-1/KRTAP5-3/KRTAP23-1/KRTAP19-6/KRTAP6-3/KRTAP12-1/KRTAP9-4/KRTAP26-1/KRTAP2-1/KRTAP5-2/KRTAP1-4/KRTAP9-8/KRTAP12-3/KRTAP25-1/KRTAP4-1/KRTAP19-7/KRTAP19-2/KRTAP6-1/KRTAP9-9/KRTAP3-3/KRT26/KRTAP27-1/KRTAP10-10/KRTAP1-3/KRT35/KRTAP10-12/KRTAP2-4/KRTAP10-8/KRTAP10-6/KRT25/KRTAP12-4/KRTAP5-8/KRTAP13-4/KRT39/LMNTD1/KRTAP22-2/KRT6C/KRTAP21-3/KRTAP10-7/KRTAP22-1/KRTAP13-2/KRTAP9-2/KRTAP…
GOCC_KERATIN_FILAMENT	GOCC_KERATIN_FILAMENT	94	0.652534	1.4817	0.01	1	1	11650	tags=49%, list=21%, signal=39%	KRTAP12-2/KRTAP24-1/KRTAP5-3/KRTAP12-1/KRTAP9-4/KRTAP2-1/KRTAP5-2/KRTAP1-4/KRTAP9-8/KRTAP12-3/KRTAP4-1/KRTAP9-9/KRTAP3-3/KRTAP10-10/KRTAP1-3/KRTAP10-12/KRTAP2-4/KRTAP10-8/KRTAP10-6/KRTAP12-4/KRTAP5-8/KRT6C/KRTAP10-7/KRTAP9-2/KRTAP4-6/KRTAP2-3/KRTAP4-9/KRT83/KRTAP5-4/KRTAP10-1/KRTAP10-4/KRT78/KRT74/KRTAP3-1/KRT79/CASP14/KRTAP9-6/KRT6B/KRTAP5-5/KRTAP5-7/KRT7/KRTAP5-1/KRT81/KRT6A/KRTAP4-5/KRTAP10-2
GOCC_T_CELL_RECEPTOR_COMPLEX	GOCC_T_CELL_RECEPTOR_COMPLEX	135	0.634936	1.43557	0.01	1	1	16075	tags=70%, list=28%, signal=50%	TRDD1/TRAV9-1/TRBV11-1/TRGV8/TRAV7/TRAV18/TRBV7-4/TRBV27/TRAV40/TRBV10-1/TRBV5-5/TRAV34/TRAV24/TRBV6-7/TRAV38-1/TRAV35/TRAV10/TRBV4-2/TRBV13/TRAV26-2/TRAV8-1/TRBV12-3/TRAV1-2/TRBV6-6/TRAV1-1/TRAV19/TRAV8-6/TRBV12-5/TRBV10-2/TRAV6/TRAV5/TRAV21/TRBV24-1/TRBV7-1/TRBV6-4/TRBV12-4/TRAV36DV7/TRAJ3/TRBV4-1/TRAV8-2/TRBV5-6/TRAV13-1/TRBV7-6/TRAV2/TRBV6-1/TRAV16/TRAV25/TRBV18/TRAV8-3/TRAV12-2/TRAV12-3/TRBV…
GOMF_ODORANT_BINDING	GOMF_ODORANT_BINDING	114	0.700022	1.58753	0.010101	1	1	8953	tags=54%, list=16%, signal=46%	OR5AR1/OR5AL1/OR8B4/OR5M10/OR5H2/OR10R2/OR5A2/OR5M11/OR8K1/OR5AC2/OR5AU1/OR10J4/OR5F1/OR5D14/OR12D3/OR6B2/OR14J1/OR5L1/GPR148/OR5L2/OR6N2/OR8B12/OR5W2/OR14A16/OR9G4/OR8D2/OR5AP2/OR8U1/OR5M9/OR10Z1/OR11L1/OR8H2/OR8D1/OR5D16/OR8G2P/OR10K1/OR10J1/OR8H1/OR5D18/OR8G1/OR4E1/OR14A2/OR12D1/OR8K5/OR6B3/OR14C36/OR5AS1/OR5M1/OR5M8/OR13A1/OR8A1/OR8I2/OR5P2/OR5H15/OR5P3/OR4E2/OR8B8/OR5B12/OR10V1/OR8G3P/OR8J3/…
GOBP_PRODUCTION_OF_SMALL_RNA_INVOLVED_IN_GENE_SILENCING_BY_RNA	GOBP_PRODUCTION_OF_SMALL_RNA_INVOLVED_IN_GENE_SILENCING_BY_RNA	56	0.633436	1.41855	0.0104167	1	1	938	tags=4%, list=2%, signal=4%	LIN28B/LIN28A
GOBP_NCRNA_3_END_PROCESSING	GOBP_NCRNA_3_END_PROCESSING	50	0.736815	1.62695	0.0107527	1	1	9991	tags=18%, list=18%, signal=15%	CT45A9/CT45A7/CT45A6/SAGE2P/CT45A8/CT45A10/SAGE1/CT45A3/CT45A5
GOCC_CUL4_RING_E3_UBIQUITIN_LIGASE_COMPLEX	GOCC_CUL4_RING_E3_UBIQUITIN_LIGASE_COMPLEX	35	0.740025	1.59112	0.0107527	1	1	4339	tags=9%, list=8%, signal=8%	DCAF8L2/DCAF8L1/DCAF12L2
GOBP_SEROTONIN_RECEPTOR_SIGNALING_PATHWAY	GOBP_SEROTONIN_RECEPTOR_SIGNALING_PATHWAY	38	0.725736	1.57711	0.0108696	1	1	7708	tags=45%, list=14%, signal=39%	HTR3B/OR5T2/OR10J5/CHRM1/OR10H3/HTR3D/HTR1E/OR10H4/HTR3E/OR10H2/HTR5A/HTR3C/HTR2C/OR10H5/HTR3A/HTR1D/CHRM2
GOBP_SNRNA_METABOLIC_PROCESS	GOBP_SNRNA_METABOLIC_PROCESS	47	0.754919	1.65191	0.0108696	1	1	9991	tags=19%, list=18%, signal=16%	CT45A9/CT45A7/CT45A6/SAGE2P/CT45A8/CT45A10/SAGE1/CT45A3/CT45A5
GOBP_NCRNA_CATABOLIC_PROCESS	GOBP_NCRNA_CATABOLIC_PROCESS	36	0.806248	1.72572	0.010989	1	1	938	tags=6%, list=2%, signal=5%	LIN28B/LIN28A
GOBP_SNRNA_PROCESSING	GOBP_SNRNA_PROCESSING	36	0.765059	1.63756	0.010989	1	1	9991	tags=25%, list=18%, signal=21%	CT45A9/CT45A7/CT45A6/SAGE2P/CT45A8/CT45A10/SAGE1/CT45A3/CT45A5
GOBP_MIRNA_METABOLIC_PROCESS	GOBP_MIRNA_METABOLIC_PROCESS	29	0.793463	1.64266	0.0111111	1	1	938	tags=7%, list=2%, signal=7%	LIN28B/LIN28A
GOCC_INTEGRATOR_COMPLEX	GOCC_INTEGRATOR_COMPLEX	28	0.762416	1.58052	0.0111111	1	1	9991	tags=32%, list=18%, signal=26%	CT45A9/CT45A7/CT45A6/SAGE2P/CT45A8/CT45A10/SAGE1/CT45A3/CT45A5
GOBP_REGULATION_OF_ARP2_3_COMPLEX_MEDIATED_ACTIN_NUCLEATION	GOBP_REGULATION_OF_ARP2_3_COMPLEX_MEDIATED_ACTIN_NUCLEATION	20	0.824912	1.671	0.0119048	1	1	455	tags=5%, list=1%, signal=5%	CTNNA2
HP_Y_LINKED_INHERITANCE	HP_Y_LINKED_INHERITANCE	17	0.804402	1.59769	0.0121951	1	1	3745	tags=41%, list=7%, signal=38%	PRY2/BPY2/DAZ3/VCY/RBMY1A1/CDY1/CDY2A
GOBP_PRE_MIRNA_PROCESSING	GOBP_PRE_MIRNA_PROCESSING	15	0.900371	1.74134	0.0126582	1	1	938	tags=13%, list=2%, signal=13%	LIN28B/LIN28A
GOBP_RESPONSE_TO_LIGHT_INTENSITY	GOBP_RESPONSE_TO_LIGHT_INTENSITY	11	0.898241	1.63498	0.0126582	1	1	1083	tags=9%, list=2%, signal=9%	KCNC2
GOBP_MIRNA_CATABOLIC_PROCESS	GOBP_MIRNA_CATABOLIC_PROCESS	10	0.94814	1.69136	0.012987	1	1	938	tags=20%, list=2%, signal=20%	LIN28B/LIN28A
GOBP_PRIMARY_MIRNA_PROCESSING	GOBP_PRIMARY_MIRNA_PROCESSING	13	0.871929	1.623	0.012987	1	1	378	tags=8%, list=1%, signal=8%	LIN28B
GOBP_REGULATION_OF_MIRNA_METABOLIC_PROCESS	GOBP_REGULATION_OF_MIRNA_METABOLIC_PROCESS	10	0.93083	1.66048	0.012987	1	1	378	tags=10%, list=1%, signal=10%	LIN28B
GOBP_RESPONSE_TO_LEUCINE	GOBP_RESPONSE_TO_LEUCINE	13	0.874798	1.62834	0.012987	1	1	1540	tags=8%, list=3%, signal=7%	PDX1
GOCC_N_TERMINAL_PROTEIN_ACETYLTRANSFERASE_COMPLEX	GOCC_N_TERMINAL_PROTEIN_ACETYLTRANSFERASE_COMPLEX	10	0.858609	1.53165	0.012987	1	1	1625	tags=10%, list=3%, signal=10%	NAA11
GOBP_B_CELL_MEDIATED_IMMUNITY	GOBP_B_CELL_MEDIATED_IMMUNITY	215	0.553699	1.2657	0.019802	1	1	19657	tags=53%, list=35%, signal=35%	IGKV2-40/IGKV2D-28/IGHV1OR15-1/C4BPB/IGKV2-28/IGKV1D-33/IGKV1D-39/C8B/C8A/IGKV1-39/IGLC6/IGKV1D-12/EXO1/IGLL1/IGKV2D-30/C4BPA/CD19/IGHV1-3/IGHV3-64/IGKV5-2/IGHV4-4/IGHV3-16/IGHV3-20/IGHV6-1/IGHV3-35/IGHV1-45/IGHV7-81/C17orf99/IGHV3-38/FOXJ1/IGKV2-30/IGHV3-43/IGKV1-12/IGHV4-28/IGHV2-70D/IGHV1-58/IGHV2-70/IGHV3-7/IGKV3D-11/IGHV3-66/IGHV1-69/IGLV3-27/IGHV4-61/LTA/IGHV2-26/CR2/IGHV3-13/IGLC7/IGHV4-31…
GOBP_IMMUNOGLOBULIN_PRODUCTION	GOBP_IMMUNOGLOBULIN_PRODUCTION	197	0.576492	1.3216	0.019802	1	1	19358	tags=54%, list=34%, signal=36%	IGKV2-40/TRAV9-1/IGKV2D-28/VPREB1/IGKV1-37/IGKV2-28/IL21/IGKV1D-33/IGKV1D-39/IGKV6D-41/IGLV3-16/IGKV1-13/IGKV3D-7/ZPBP2/IGKV1-39/POLQ/IGKV1D-43/TRAV18/IGLV2-33/IGLV5-48/IGKV1D-12/EXO1/TRAV40/IGLV5-37/IGKV2D-30/IGKV1D-17/IGKV5-2/IGKV3-7/IGKV1-8/TRAV38-1/IGLV1-50/IGKV6D-21/IGLV11-55/IGKV2D-24/IGKV2D-26/IGKV1D-8/IGKV3D-15/IGKV1D-42/C17orf99/TRAV19/IGKV2-30/IGKV1-12/IGKV3D-11/FCRL3/IGLV3-22/IGKV2D-29…
GOBP_COMPLEMENT_ACTIVATION	GOBP_COMPLEMENT_ACTIVATION	167	0.582489	1.32226	0.02	1	1	19657	tags=66%, list=35%, signal=43%	MIR520B/IGKV2-40/IGKV2D-28/CFHR2/IGHV1OR15-1/C4BPB/IGKV2-28/MIR520E/IGKV1D-33/IGKV1D-39/C8B/C8A/CR1L/CFHR4/IGKV1-39/IGLC6/IGKV1D-12/IGLL1/CFHR5/IGKV2D-30/C4BPA/CD19/IGHV1-3/IGHV3-64/IGKV5-2/IGHV4-4/IGHV3-16/IGHV3-20/IGHV6-1/IGHV3-35/IGHV1-45/IGHV7-81/IGHV3-38/IGKV2-30/IGHV3-43/IGKV1-12/IGHV4-28/IGHV2-70D/IGHV1-58/IGHV2-70/IGHV3-7/IGKV3D-11/CFHR1/IGHV3-66/IGHV1-69/IGLV3-27/IGHV4-61/IGHV2-26/CR2/IG…
GOBP_REGULATION_OF_COMPLEMENT_ACTIVATION	GOBP_REGULATION_OF_COMPLEMENT_ACTIVATION	114	0.593236	1.34536	0.020202	1	1	19657	tags=65%, list=35%, signal=42%	MIR520B/IGKV2-40/IGKV2D-28/CFHR2/IGHV1OR15-1/C4BPB/IGKV2-28/MIR520E/IGKV1D-33/IGKV1D-39/C8B/C8A/CR1L/CFHR4/IGKV1-39/IGLC6/IGKV1D-12/CFHR5/IGKV2D-30/C4BPA/CD19/IGKV5-2/IGKV2-30/IGKV1-12/IGHV2-70/IGHV3-7/IGKV3D-11/CFHR1/IGHV1-69/IGLV3-27/CR2/IGHV3-13/IGLC7/CD5L/IGHV2-5/CR1/IGLV7-43/IGKV3D-20/IGHV3-48/IGHV3-33/IGKV1-17/IGKV2-29/IGHV3-11/IGLV6-57/IGHV4-34/IGHV4-39/IGKV3-15/SUSD4/IGLV1-44/IGLV3-25/C8G…
GOBP_CIRCADIAN_REGULATION_OF_GENE_EXPRESSION	GOBP_CIRCADIAN_REGULATION_OF_GENE_EXPRESSION	67	0.643855	1.42259	0.0212766	1	1	9718	tags=10%, list=17%, signal=9%	PASD1/CARTPT/NR0B2/DRD2/ZPBP2/DRD3/MC3R
GOCC_SNARE_COMPLEX	GOCC_SNARE_COMPLEX	50	0.648635	1.43224	0.0215054	1	1	8195	tags=8%, list=14%, signal=7%	STXBP5L/CPLX2/CPLX3/CPLX4
GOBP_REGULATION_OF_NEUROBLAST_PROLIFERATION	GOBP_REGULATION_OF_NEUROBLAST_PROLIFERATION	30	0.722405	1.51029	0.021978	1	1	7123	tags=20%, list=13%, signal=17%	FOXG1/VAX1/SIX3/DRD2/DMRTA2/OTP
GOBP_NEGATIVE_REGULATION_OF_RESPONSE_TO_ENDOPLASMIC_RETICULUM_STRESS	GOBP_NEGATIVE_REGULATION_OF_RESPONSE_TO_ENDOPLASMIC_RETICULUM_STRESS	44	0.672303	1.46619	0.0222222	1	1	2015	tags=5%, list=4%, signal=4%	PDX1/MAGEA3
GOCC_POLYSOMAL_RIBOSOME	GOCC_POLYSOMAL_RIBOSOME	32	0.689717	1.44631	0.0222222	1	1	4214	tags=3%, list=7%, signal=3%	NR0B1
GOCC_NURD_COMPLEX	GOCC_NURD_COMPLEX	15	0.833555	1.61212	0.0253165	1	1	2131	tags=7%, list=4%, signal=6%	CHD5
GOMF_PEPTIDE_ALPHA_N_ACETYLTRANSFERASE_ACTIVITY	GOMF_PEPTIDE_ALPHA_N_ACETYLTRANSFERASE_ACTIVITY	11	0.838034	1.52539	0.0253165	1	1	1625	tags=9%, list=3%, signal=9%	NAA11
GOMF_PEPTIDASE_REGULATOR_ACTIVITY	GOMF_PEPTIDASE_REGULATOR_ACTIVITY	227	0.523538	1.19879	0.029703	1	1	14754	tags=28%, list=26%, signal=21%	CST9LP1/WFDC9/BIRC8/CST4/UMODL1/SERPINB5/CST9L/SERPINB3/SERPINB12/SERPINB4/EPPIN/C3P1/SMR3B/WFDC8/SPINK7/SERPINB13/PRSS22/SPINT4/SPINK4/SPP2/SERPINB10/CSTL1/WFDC12/CST11/WFDC5/AHSG/SPINK6/PI3/CST8/CST9/SERPINB11/NLRP7/SPINT3/CRB2/FETUB/OPRPN/ITIH6/HMSD/SERPINA11/WFDC13/HRG/SERPINI2/R3HDML/SERPINA10/COL7A1/SERPINB7/BIRC5/CARD18/SLPI/CARD17/WFDC11/SERPINA9/CST6/ITIH1/WFDC10A/SERPINB2/SERPINA5/KNG1/…
HP_SEVERE_GLOBAL_DEVELOPMENTAL_DELAY	HP_SEVERE_GLOBAL_DEVELOPMENTAL_DELAY	180	0.564508	1.28615	0.03	1	1	10673	tags=13%, list=19%, signal=11%	CTNNA2/GABRG2/FOXG1/GRIN1/KCNJ6/NTNG1/ACTL6B/MT-TW/TBR1/RTL1/CTNND2/OTX2/FOXA2/NRXN1/RELN/UNC80/TUBB3/KIF15/CNTNAP2/MYT1L/BUB1B/GABRA2/KCNH1/DOCK3
GOBP_RESPONSE_TO_CATECHOLAMINE	GOBP_RESPONSE_TO_CATECHOLAMINE	107	0.593797	1.34247	0.030303	1	1	7708	tags=20%, list=14%, signal=17%	HTR3B/OR5T2/OR10J5/CHRM1/OR10H3/HTR3D/HTR1E/OR10H4/RGS8/HTR3E/OR10H2/HTR5A/HTR3C/HTR2C/CALY/DRD2/OR10H5/HTR3A/HTR1D/DRD3/CHRM2
GOMF_NEUROTRANSMITTER_RECEPTOR_ACTIVITY	GOMF_NEUROTRANSMITTER_RECEPTOR_ACTIVITY	110	0.588698	1.33426	0.030303	1	1	14972	tags=50%, list=26%, signal=37%	HTR3B/GABRG2/CHRNA9/GRIA2/OR5T2/GABRR3/OR10J5/CHRM1/OR10H3/GRIN1/HTR3D/HTR1E/OR10H4/HTR3E/GABRA3/GRID2/OR10H2/HTR5A/HTR3C/HTR2C/GABRG3/GRM1/DRD2/OR10H5/GABRA1/GABRA4/HTR3A/HTR1D/GABRA6/CHRNB3/GLRA3/DRD3/CHRM2/ADRB1/GRIK1/GABRA2/CHRNB2/CHRNA3/ADORA1/HTR4/CHRM4/CHRNA5/GLRA1/CHRNA6/GLRA2/HTR1A/GRIK5/GRIK4/GRIN2B/GABRP/CHRND/GRIN2D/GRIN3A/CHRNB4/OR5T3
GOBP_NEURAL_NUCLEUS_DEVELOPMENT	GOBP_NEURAL_NUCLEUS_DEVELOPMENT	60	0.609139	1.36154	0.03125	1	1	8069	tags=17%, list=14%, signal=14%	KCNC2/FGF9/HOXB1/SYNGR3/KIRREL3/NKX2-1/ASCL1/CDK5R2/INA/PHOX2B
GOCC_IMMUNOGLOBULIN_COMPLEX_CIRCULATING	GOCC_IMMUNOGLOBULIN_COMPLEX_CIRCULATING	66	0.604042	1.33188	0.0319149	1	1	19657	tags=82%, list=35%, signal=53%	IGHV1OR15-1/IGLC6/IGLL1/IGHV1-3/IGHV3-64/IGHV4-4/IGHV3-16/IGHV3-20/IGHV6-1/IGHV3-35/IGHV1-45/IGHV7-81/IGHV3-38/IGHV3-43/IGHV4-28/IGHV2-70D/IGHV1-58/IGHV2-70/IGHV3-7/IGHV3-66/IGHV1-69/IGHV4-61/IGHV2-26/IGHV3-13/IGLC7/IGHV4-31/IGHV2-5/IGHV3-48/IGHV1-24/TRBC1/IGHV3-33/IGHV3-11/IGHV1-69D/IGHV3-73/IGHV4-34/IGHV3-72/IGHV4-39/IGHV3-21/IGHV3-49/IGLL5/IGHV3-74/IGHV1-18/IGHV4-59/IGHV3-15/IGHG3/IGHV3-53/IGH…
GOBP_POSITIVE_REGULATION_OF_INSULIN_SECRETION_INVOLVED_IN_CELLULAR_RESPONSE_TO_GLUCOSE_STIMULUS	GOBP_POSITIVE_REGULATION_OF_INSULIN_SECRETION_INVOLVED_IN_CELLULAR_RESPONSE_TO_GLUCOSE_STIMULUS	35	0.690868	1.48543	0.0322581	1	1	5484	tags=14%, list=10%, signal=13%	CRH/PDX1/GCG/RFX6/CFTR
GOBP_POSITIVE_REGULATION_OF_UBIQUITIN_PROTEIN_TRANSFERASE_ACTIVITY	GOBP_POSITIVE_REGULATION_OF_UBIQUITIN_PROTEIN_TRANSFERASE_ACTIVITY	34	0.668576	1.42338	0.0326087	1	1	12752	tags=21%, list=23%, signal=16%	MAGEC2/MAGEA2B/MAGEA2/PLK1/CDC20B/CDC20/UBE2C
GOBP_RNA_DESTABILIZATION	GOBP_RNA_DESTABILIZATION	36	0.690656	1.4783	0.032967	1	1	378	tags=3%, list=1%, signal=3%	LIN28B
GOMF_SEROTONIN_RECEPTOR_ACTIVITY	GOMF_SEROTONIN_RECEPTOR_ACTIVITY	33	0.672247	1.42381	0.032967	1	1	7708	tags=36%, list=14%, signal=31%	OR5T2/OR10J5/CHRM1/OR10H3/HTR1E/OR10H4/OR10H2/HTR5A/HTR2C/OR10H5/HTR1D/CHRM2
HP_CONGENITAL_NYSTAGMUS	HP_CONGENITAL_NYSTAGMUS	30	0.67771	1.41685	0.032967	1	1	10673	tags=20%, list=19%, signal=16%	FRMD7/NTNG1/ACTL6B/CNGB3/MYT1L/DOCK3
GOBP_NEGATIVE_REGULATION_OF_ENDOPLASMIC_RETICULUM_STRESS_INDUCED_INTRINSIC_APOPTOTIC_SIGNALING_PATHWAY	GOBP_NEGATIVE_REGULATION_OF_ENDOPLASMIC_RETICULUM_STRESS_INDUCED_INTRINSIC_APOPTOTIC_SIGNALING_PATHWAY	18	0.795461	1.56915	0.037037	1	1	2015	tags=11%, list=4%, signal=11%	PDX1/MAGEA3
GOMF_TRANSCRIPTION_REGULATOR_INHIBITOR_ACTIVITY	GOMF_TRANSCRIPTION_REGULATOR_INHIBITOR_ACTIVITY	18	0.798925	1.57598	0.037037	1	1	4162	tags=17%, list=7%, signal=15%	PASD1/TFDP3/NR0B2
GOCC_EXTRINSIC_COMPONENT_OF_MITOCHONDRIAL_INNER_MEMBRANE	GOCC_EXTRINSIC_COMPONENT_OF_MITOCHONDRIAL_INNER_MEMBRANE	15	0.809155	1.56493	0.0379747	1	1	977	tags=7%, list=2%, signal=7%	DUSP21
HP_ABNORMAL_HYPOTHALAMUS_MORPHOLOGY	HP_ABNORMAL_HYPOTHALAMUS_MORPHOLOGY	16	0.812261	1.58175	0.0379747	1	1	5133	tags=12%, list=9%, signal=11%	SIX6/SOX2
HP_HYPOTHALAMIC_HAMARTOMA	HP_HYPOTHALAMIC_HAMARTOMA	12	0.834904	1.50572	0.0384615	1	1	5133	tags=17%, list=9%, signal=15%	SIX6/SOX2
GOMF_INTRONIC_TRANSCRIPTION_REGULATORY_REGION_SEQUENCE_SPECIFIC_DNA_BINDING	GOMF_INTRONIC_TRANSCRIPTION_REGULATORY_REGION_SEQUENCE_SPECIFIC_DNA_BINDING	10	0.840139	1.4987	0.038961	1	1	4779	tags=30%, list=8%, signal=27%	VAX1/GRHL2/NKX2-1
GOBP_CARDIAC_VASCULAR_SMOOTH_MUSCLE_CELL_DIFFERENTIATION	GOBP_CARDIAC_VASCULAR_SMOOTH_MUSCLE_CELL_DIFFERENTIATION	10	-0.876797	-1.82617	0.04	1	1	50	tags=30%, list=0%, signal=30%	GPER1/HEY2/MIR1-1
GOBP_CARNITINE_METABOLIC_PROCESS	GOBP_CARNITINE_METABOLIC_PROCESS	13	-0.606735	-1.45536	0.04	1	1	13860	tags=77%, list=25%, signal=58%	CPT1A/CRAT/ACADM/ALDH9A1/CPT1B/SHMT1/CPT1C/ACADL/BBOX1/SLC22A4
GOBP_G_PROTEIN_COUPLED_RECEPTOR_SIGNALING_PATHWAY_INVOLVED_IN_HEART_PROCESS	GOBP_G_PROTEIN_COUPLED_RECEPTOR_SIGNALING_PATHWAY_INVOLVED_IN_HEART_PROCESS	13	-0.885941	-2.12508	0.04	1	1	50	tags=31%, list=0%, signal=31%	MIR30E/RAMP3/PLN/MIR1-1
GOBP_NEGATIVE_REGULATION_OF_ENDOTHELIAL_CELL_DIFFERENTIATION	GOBP_NEGATIVE_REGULATION_OF_ENDOTHELIAL_CELL_DIFFERENTIATION	10	-0.765033	-1.59339	0.04	1	1	50	tags=30%, list=0%, signal=30%	NOTCH4/MIR495/MIR1-1
GOBP_NEGATIVE_REGULATION_OF_MACROPHAGE_DERIVED_FOAM_CELL_DIFFERENTIATION	GOBP_NEGATIVE_REGULATION_OF_MACROPHAGE_DERIVED_FOAM_CELL_DIFFERENTIATION	13	-0.673027	-1.61437	0.04	1	1	567	tags=69%, list=1%, signal=69%	CRP/ABCG1/ABCA1/PPARG/NFKBIA/PPARA/CETP/ABCA5/ADIPOQ
GOBP_NEGATIVE_REGULATION_OF_RECEPTOR_INTERNALIZATION	GOBP_NEGATIVE_REGULATION_OF_RECEPTOR_INTERNALIZATION	13	-0.643967	-1.54466	0.04	1	1	13590	tags=38%, list=24%, signal=29%	DLG4/ANKRD13B/LRRTM2/MIR199A1/NECAB2
GOBP_NEURON_MIGRATION	GOBP_NEURON_MIGRATION	145	0.559208	1.252	0.04	1	1	10097	tags=19%, list=18%, signal=15%	CCKAR/NKX6-1/CTNNA2/FEZF2/TLX3/SOX14/FOXG1/VAX1/SOX1/KIRREL3/NTNG1/TBX20/NKX2-1/DRD2/ASCL1/CDK5R2/CCK/DCC/BARHL1/BARHL2/PHOX2B/RELN/LHX1/OLIG3/DCX/ERBB4/FEZF1
GOBP_REGULATION_OF_PEPTIDYL_CYSTEINE_S_NITROSYLATION	GOBP_REGULATION_OF_PEPTIDYL_CYSTEINE_S_NITROSYLATION	10	-0.755335	-1.57319	0.04	1	1	223	tags=20%, list=0%, signal=20%	ACE/MIR132
GOBP_RESPONSE_TO_LAMINAR_FLUID_SHEAR_STRESS	GOBP_RESPONSE_TO_LAMINAR_FLUID_SHEAR_STRESS	13	-0.623883	-1.49649	0.04	1	1	16670	tags=62%, list=29%, signal=43%	ABCA1/ETS1/SMAD7/KLF4/KLF2/SMAD6/ASS1/MIR126
GOBP_VASCULAR_ASSOCIATED_SMOOTH_MUSCLE_CELL_APOPTOTIC_PROCESS	GOBP_VASCULAR_ASSOCIATED_SMOOTH_MUSCLE_CELL_APOPTOTIC_PROCESS	13	-0.811756	-1.94713	0.04	1	1	50	tags=23%, list=0%, signal=23%	MIR210/MIR140/MIR1-1
GOMF_ANTIGEN_BINDING	GOMF_ANTIGEN_BINDING	153	0.575709	1.30246	0.04	1	1	19657	tags=63%, list=35%, signal=41%	IGKV2-40/IGKV2D-28/IGHV1OR15-1/IGKV1D-33/IGKV1D-39/CLEC4M/IGKV1-39/IGLC6/IGKV1D-12/IGLL1/IGHV1-3/IGHV3-64/IGKV5-2/IGHV4-4/IGHV3-16/IGHV3-20/IGHV6-1/CD1A/IGHV3-35/IGHV1-45/TRBV12-3/IGHV7-81/IGHV3-38/TRAV19/IGKV2-30/IGHV3-43/IGHV4-28/IGHV2-70D/IGHV1-58/IGHV2-70/IGHV3-7/IGKV3D-11/LAG3/IGHV3-66/IGHV1-69/IGLV3-27/IGHV4-61/IGHV2-26/IGHV3-13/IGLC7/IGHV4-31/IGHV2-5/TRAV29DV5/TRBV7-9/TRAV8-4/IGLV7-43/KLRC…
GOMF_ENDOPEPTIDASE_REGULATOR_ACTIVITY	GOMF_ENDOPEPTIDASE_REGULATOR_ACTIVITY	190	0.537275	1.22388	0.04	1	1	14754	tags=31%, list=26%, signal=23%	CST9LP1/WFDC9/BIRC8/CST4/SERPINB5/CST9L/SERPINB3/SERPINB12/SERPINB4/EPPIN/C3P1/SMR3B/WFDC8/SPINK7/SERPINB13/SPINT4/SPINK4/SPP2/SERPINB10/CSTL1/WFDC12/CST11/WFDC5/AHSG/SPINK6/PI3/CST8/CST9/SERPINB11/NLRP7/SPINT3/CRB2/FETUB/OPRPN/ITIH6/HMSD/SERPINA11/WFDC13/HRG/SERPINI2/SERPINA10/COL7A1/SERPINB7/BIRC5/CARD18/SLPI/CARD17/WFDC11/SERPINA9/CST6/ITIH1/WFDC10A/SERPINB2/SERPINA5/KNG1/CSN2/RARRES1/SERPINA3…
GOBP_MACROPHAGE_PROLIFERATION	GOBP_MACROPHAGE_PROLIFERATION	12	-0.687532	-1.58835	0.0416667	1	1	526	tags=25%, list=1%, signal=25%	CX3CL1/IL33/MIR181B1
GOBP_NEGATIVE_REGULATION_OF_DELAYED_RECTIFIER_POTASSIUM_CHANNEL_ACTIVITY	GOBP_NEGATIVE_REGULATION_OF_DELAYED_RECTIFIER_POTASSIUM_CHANNEL_ACTIVITY	12	-0.79348	-1.83311	0.0416667	1	1	769	tags=50%, list=1%, signal=49%	KCNE4/KCNE3/KCNRG/KCNAB1/MTNR1B/MIR1-1
GOBP_PHENOTYPIC_SWITCHING	GOBP_PHENOTYPIC_SWITCHING	12	-0.639433	-1.47723	0.0416667	1	1	50	tags=17%, list=0%, signal=17%	MIR199B/MIR1-1
GOBP_POSITIVE_REGULATION_OF_CARDIAC_MUSCLE_CELL_DIFFERENTIATION	GOBP_POSITIVE_REGULATION_OF_CARDIAC_MUSCLE_CELL_DIFFERENTIATION	12	-0.828068	-1.91302	0.0416667	1	1	597	tags=25%, list=1%, signal=25%	MIR499A/MIR204/MIR1-1
GOBP_POSITIVE_REGULATION_OF_MYOTUBE_DIFFERENTIATION	GOBP_POSITIVE_REGULATION_OF_MYOTUBE_DIFFERENTIATION	14	-0.766836	-1.87685	0.0416667	1	1	697	tags=21%, list=1%, signal=21%	MIR206/MIR133B/MIR1-1
GOBP_POSITIVE_REGULATION_OF_STRIATED_MUSCLE_CONTRACTION	GOBP_POSITIVE_REGULATION_OF_STRIATED_MUSCLE_CONTRACTION	12	-0.826404	-1.90917	0.0416667	1	1	50	tags=25%, list=0%, signal=25%	NPPA/ADRA1A/MIR1-1
GOBP_POSITIVE_REGULATION_OF_VASCULOGENESIS	GOBP_POSITIVE_REGULATION_OF_VASCULOGENESIS	12	-0.68327	-1.5785	0.0416667	1	1	15705	tags=58%, list=28%, signal=42%	ADM/RAPGEF2/RAMP2/CD34/KDR/ASB4/TMEM100
GOBP_REGULATION_OF_ANGIOTENSIN_LEVELS_IN_BLOOD	GOBP_REGULATION_OF_ANGIOTENSIN_LEVELS_IN_BLOOD	12	-0.672748	-1.55419	0.0416667	1	1	12398	tags=67%, list=22%, signal=52%	AOPEP/CMA1/CPA3/MME/ENPEP/ACE/ACE2/REN
GOMF_CYSTEINE_TYPE_ENDOPEPTIDASE_INHIBITOR_ACTIVITY	GOMF_CYSTEINE_TYPE_ENDOPEPTIDASE_INHIBITOR_ACTIVITY	56	0.598232	1.33972	0.0416667	1	1	14754	tags=36%, list=26%, signal=26%	CST9LP1/BIRC8/CST4/CST9L/SERPINB3/SERPINB13/CSTL1/CST11/AHSG/CST8/CST9/FETUB/HRG/BIRC5/CARD18/CARD17/CST6/KNG1/CSN2/PTTG1
GOMF_DYNACTIN_BINDING	GOMF_DYNACTIN_BINDING	12	-0.644104	-1.48802	0.0416667	1	1	4586	tags=25%, list=8%, signal=23%	HOOK3/MAPT/SPTBN5
GOMF_EFFLUX_TRANSMEMBRANE_TRANSPORTER_ACTIVITY	GOMF_EFFLUX_TRANSMEMBRANE_TRANSPORTER_ACTIVITY	14	-0.642753	-1.57315	0.0416667	1	1	9946	tags=57%, list=18%, signal=47%	SLC29A4/ABCB6/GJA1/ABCB1/SLC17A3/SLC22A2/ABCG2/ABCB5
HP_APLASIA_HYPOPLASIA_OF_THE_DISTAL_PHALANX_OF_THE_5TH_TOE	HP_APLASIA_HYPOPLASIA_OF_THE_DISTAL_PHALANX_OF_THE_5TH_TOE	12	-0.661176	-1.52746	0.0416667	1	1	6372	tags=58%, list=11%, signal=52%	DPF2/ARID1B/SMARCE1/SMARCC2/SOX4/KCNN3/SOX11
GOMF_IMMUNOGLOBULIN_RECEPTOR_BINDING	GOMF_IMMUNOGLOBULIN_RECEPTOR_BINDING	68	0.609021	1.35077	0.0421053	1	1	19657	tags=79%, list=35%, signal=52%	IGHV1OR15-1/TARM1/IGLC6/IGLL1/IGHV1-3/IGHV3-64/IGHV4-4/IGHV3-16/IGHV3-20/IGHV6-1/IGHV3-35/IGHV1-45/IGHV7-81/IGHV3-38/IGHV3-43/IGHV4-28/IGHV2-70D/IGHV1-58/IGHV2-70/IGHV3-7/IGHV3-66/IGHV1-69/IGHV4-61/IGHV2-26/IGHV3-13/IGLC7/IGHV4-31/IGHV2-5/IGHV3-48/IGHV1-24/TRBC1/IGHV3-33/IGHV3-11/IGHV1-69D/IGHV3-73/IGHV4-34/IGHV3-72/IGHV4-39/IGHV3-21/IGHV3-49/IGLL5/IGHV3-74/IGHV1-18/IGHV4-59/IGHV3-15/IGHG3/IGHV3-…
GOBP_CALCIUM_ION_EXPORT	GOBP_CALCIUM_ION_EXPORT	11	-0.792078	-1.68512	0.0434783	1	1	1295	tags=27%, list=2%, signal=27%	RGS9/ATP2B3/MIR1-1
GOBP_CORONARY_VASCULATURE_MORPHOGENESIS	GOBP_CORONARY_VASCULATURE_MORPHOGENESIS	16	-0.724154	-1.78541	0.0434783	1	1	50	tags=12%, list=0%, signal=12%	HEY2/MIR1-1
GOBP_NEGATIVE_REGULATION_OF_VOLTAGE_GATED_POTASSIUM_CHANNEL_ACTIVITY	GOBP_NEGATIVE_REGULATION_OF_VOLTAGE_GATED_POTASSIUM_CHANNEL_ACTIVITY	16	-0.748053	-1.84433	0.0434783	1	1	769	tags=19%, list=1%, signal=19%	KCNAB1/MTNR1B/MIR1-1
GOBP_NOTCH_SIGNALING_INVOLVED_IN_HEART_DEVELOPMENT	GOBP_NOTCH_SIGNALING_INVOLVED_IN_HEART_DEVELOPMENT	11	-0.692534	-1.47334	0.0434783	1	1	15782	tags=73%, list=28%, signal=52%	SNAI2/JAG1/NOTCH1/SNAI1/HEY1/HEYL/DLL4/HEY2
GOBP_POSITIVE_REGULATION_OF_SMOOTH_MUSCLE_CELL_APOPTOTIC_PROCESS	GOBP_POSITIVE_REGULATION_OF_SMOOTH_MUSCLE_CELL_APOPTOTIC_PROCESS	16	-0.707129	-1.74343	0.0434783	1	1	50	tags=12%, list=0%, signal=12%	MIR140/MIR1-1
GOBP_POSITIVE_REGULATION_OF_SMOOTH_MUSCLE_CELL_DIFFERENTIATION	GOBP_POSITIVE_REGULATION_OF_SMOOTH_MUSCLE_CELL_DIFFERENTIATION	16	-0.849535	-2.09454	0.0434783	1	1	50	tags=19%, list=0%, signal=19%	GPER1/MIR140/MIR1-1
GOBP_POSITIVE_REGULATION_OF_VASCULAR_ASSOCIATED_SMOOTH_MUSCLE_CELL_DIFFERENTIATION	GOBP_POSITIVE_REGULATION_OF_VASCULAR_ASSOCIATED_SMOOTH_MUSCLE_CELL_DIFFERENTIATION	11	-0.867349	-1.84525	0.0434783	1	1	50	tags=27%, list=0%, signal=27%	GPER1/MIR140/MIR1-1
GOBP_PROTEIN_NITROSYLATION	GOBP_PROTEIN_NITROSYLATION	16	-0.706739	-1.74247	0.0434783	1	1	223	tags=12%, list=0%, signal=12%	ACE/MIR132
GOBP_REGULATION_OF_PRODUCTION_OF_SMALL_RNA_INVOLVED_IN_GENE_SILENCING_BY_RNA	GOBP_REGULATION_OF_PRODUCTION_OF_SMALL_RNA_INVOLVED_IN_GENE_SILENCING_BY_RNA	26	0.741365	1.53038	0.0444444	1	1	938	tags=8%, list=2%, signal=8%	LIN28B/LIN28A
HP_SUPERNUMERARY_BONES_OF_THE_AXIAL_SKELETON	HP_SUPERNUMERARY_BONES_OF_THE_AXIAL_SKELETON	25	0.736535	1.52091	0.0444444	1	1	5133	tags=12%, list=9%, signal=11%	PAX3/SIX6/SOX2
GOBP_REGULATION_OF_MYOBLAST_PROLIFERATION	GOBP_REGULATION_OF_MYOBLAST_PROLIFERATION	18	-0.713643	-1.85361	0.047619	1	1	3325	tags=28%, list=6%, signal=26%	MIR499A/MSTN/MIR133B/MIR204/MIR1-1
KIRP
ID	Description	setSize	enrichmentScore	NES	pvalue	p.adjust	qvalues	rank	leading_edge	core_enrichment
GOMF_DNA_BINDING_TRANSCRIPTION_ACTIVATOR_ACTIVITY	GOMF_DNA_BINDING_TRANSCRIPTION_ACTIVATOR_ACTIVITY	444	0.445955	1.28214	0.0125	1	1	11564	tags=18%, list=20%, signal=14%	RAX/ISL1/GATA4/ZIC3/SOX1/LHX3/ONECUT3/TBX20/TBX5/PTF1A/DMRT1/NEUROD6/FOXA1/TFAP2A/POU4F1/GBX2/HAND1/TLX1/NEUROD1/OTX1/TFAP2B/NKX2-5/MYF5/FOXF2/MAFA/POU4F2/TP63/HOXC13/MYOD1/EBF2/PHOX2B/CTCFL/GRHL2/MYOG/GATA3/RFX6/HAND2/WT1/HOXD10/ZNF729/SIX1/E2F2/PRDM16/MECOM/ZNF99/SIX4/MEOX2/MYBL2/NHLH2/MEIS3/EGR4/MYF6/ETV4/E2F1/PAX1/PITX1/TFAP2C/DMRT2/ESRRB/MEOX1/HOXD13/ATOH1/SOX30/MYB/MYBL1/TLX2/ONECUT2/ZNF750…
HP_DEVIATION_OF_THE_HAND_OR_OF_FINGERS_OF_THE_HAND	HP_DEVIATION_OF_THE_HAND_OR_OF_FINGERS_OF_THE_HAND	406	0.450567	1.27732	0.0125	1	1	13623	tags=18%, list=24%, signal=14%	RTL1/GATA4/ZIC3/TBX5/PTF1A/TFAP2A/TBX4/TFAP2B/TBX22/NKX2-5/MYBPC1/SOST/PAX3/BRIP1/TP63/TBX1/BMPR1B/MYOD1/ESCO2/L1CAM/SALL4/XRCC2/CKAP2L/TNNT3/CDC6/CDC45/NOG/RAD51/COL9A1/TBX15/FANCB/ORC6/BUB1/PRDM16/MECOM/CEP55/HMGA2/BUB1B/CENPE/BLM/LMX1B/CDT1/BRCA2/MAGEL2/PITX1/BRCA1/NALCN/HOXD13/PLK4/ORC1/GABRD/WNT7A/FANCA/FANCI/IGF2/FANCD2/TRIP13/NPAP1/DLK1/UBE2T/TWIST1/CSGALNACT1/PIEZO2/KIF7/COL11A1/HOXA13/SN…
GOBP_EMBRYONIC_ORGAN_DEVELOPMENT	GOBP_EMBRYONIC_ORGAN_DEVELOPMENT	411	0.459663	1.30665	0.0126582	1	1	13723	tags=21%, list=24%, signal=16%	GATA4/ZIC3/TBX20/TFAP2A/TBR1/HMX3/HMX2/GBX2/SLITRK6/HAND1/NEUROD1/OTX1/TBX4/SHOX2/ZIC1/MYO3B/TBX22/NKX2-5/MYF5/CDX2/MMP16/RYR2/FOXG1/LHX1/FOXE1/NKX3-2/E2F7/POU3F4/TBX18/EN2/FOXF2/DCANP1/TBX1/CLRN1/DLX6/GRHL2/GATA3/HAND2/NOG/COL2A1/HOXD10/SIX1/TBX15/BMP5/GJB6/EN1/SIX4/WNT9B/E2F8/RSPO3/CITED1/APELA/PLK4/ATOH1/STRA6/LHFPL5/NTN1/IGF2/HOXD3/GJB5/NOTO/CRB2/FOXI1/WNT7B/STIL/FOXH1/WNT2/TPO/IL3/ATP8A2/TWI…
GOBP_REPRODUCTIVE_SYSTEM_DEVELOPMENT	GOBP_REPRODUCTIVE_SYSTEM_DEVELOPMENT	408	0.498112	1.41355	0.0126582	1	1	9970	tags=16%, list=18%, signal=13%	MIR16-1/TSPY2/TSPY8/TSPY10/MC2R/GATA4/TSPY1/BMP15/NR5A1/LHX3/SPO11/ZFP42/PLAC1/DMRT1/FOXA1/HAND1/LHX8/TSPY3/NKX2-1/CDX2/SERPINB5/TEX19/LHX1/E2F7/FOXL2/FOXF2/DCANP1/BRIP1/TP63/BMPR1B/PSAPL1/MAS1/PCYT1B/STAR/GRHL2/GATA3/KIF18A/WT1/RXFP2/NOG/BMP5/SIX4/NHLH2/WNT9B/HOXB13/RAD21L1/AMH/E2F8/RSPO3/CITED1/INHA/BRCA2/SEMA3A/TFAP2C/APELA/SFRP2/TYRO3/HOXD13/PLK4/FGF9/SYCP2/WNT7A/CCNF/FANCA/STRA6
GOBP_PATTERN_SPECIFICATION_PROCESS	GOBP_PATTERN_SPECIFICATION_PROCESS	426	0.490921	1.39734	0.012987	1	1	12694	tags=23%, list=22%, signal=18%	RAX/ISL1/GATA4/ZIC3/SOX1/LHX3/TBX20/TBX5/FOXA1/DMRT3/TBR1/GBX2/HAND1/NEUROD1/OTX1/NKX2-1/UNCX/ZIC1/NTF4/TBX22/NKX2-5/MYF5/CDX2/HELT/DNAH11/BARX1/FOXG1/LHX1/NKX3-2/TBX18/IRX4/RIPPLY2/DCANP1/TP63/IRX1/TBX1/HOXC13/BMPR1B/HOXD11/DLL3/DMRTA2/XRCC2/HAND2/FOXA2/WT1/NOG/ERBB4/HOXD10/SIX1/TBXT/EN1/MEOX2/IRX2/MEIS3/LMX1B/RIPPLY3/MYF6/CITED1/PAX1/SEMA3A/DMRT2/MEOX1/SFRP2/HOXD13/PCDH8/DLX1/WNT8B/WNT7A/MEIS2/…
GOMF_PASSIVE_TRANSMEMBRANE_TRANSPORTER_ACTIVITY	GOMF_PASSIVE_TRANSMEMBRANE_TRANSPORTER_ACTIVITY	477	0.443685	1.29352	0.012987	1	1	11390	tags=24%, list=20%, signal=20%	AQP12B/AQP12A/KCNK12/TRPM5/GABRG1/ASIC5/GRID2/CACNG6/CALHM1/GJE1/GABRG2/GABRA2/KCNJ6/SCNN1G/CNGA3/BSND/CALHM3/KCNU1/GABRA3/GABRA4/FAM155A/KCNJ18/RYR2/FXYD3/GRIA2/GABRG3/GJA8/CACNA1S/SCN5A/CHRNB3/KCNB1/CNGB3/KCNC1/GLRA3/KCNIP1/CACNG5/HTR3B/OPRM1/KCNA4/GABRA6/UNC80/HTR3A/GABRA5/KCNC2/KCNH5/NMUR2/KCNK2/GJB7/CALHM4/CACNG8/KCNH1/CNGB1/KCNA5/CHRNA5/SCN2B/SCN1A/ASIC4/KCNG3/ANO2/CLCA2/HCN2/KCNJ1/KCNJ9/GA…
GOBP_CHROMOSOME_SEGREGATION	GOBP_CHROMOSOME_SEGREGATION	335	0.495662	1.39923	0.0131579	1	1	14666	tags=28%, list=26%, signal=21%	C14orf39/SPO11/PRDM9/FMN2/UBE2DNL/HORMAD1/KIF14/BRIP1/SMC1B/ESCO2/KIF4B/NEK2/TTK/HJURP/KIF18B/CENPK/SKA1/RMI2/SGO1/KIF18A/SPATA22/CDC6/KIF4A/NCAPG/NUF2/HASPIN/CENPF/DLGAP5/TERB2/EME1/BUB1/SKA3/BUB1B/CENPE/BIRC5/TOP2A/RAD21L1/TEX15/MKI67/NDC80/CDCA5/NCAPH/AURKB/CDT1/FAM83D/OIP5/KIFC1/KNL1/HECW2/KIF2C/SYCE2/BRCA1/CCNE1/MAD2L1/PLK1/SYCP2/PTTG1/SGO2/UBE2C/ANKRD31/PRC1/DSCC1/SPC25/CENPH/CDCA8/CDC20/ME…
GOBP_REGIONALIZATION	GOBP_REGIONALIZATION	326	0.466487	1.31265	0.0133333	1	1	15698	tags=30%, list=28%, signal=22%	ISL1/GATA4/ZIC3/SOX1/LHX3/TBX20/FOXA1/DMRT3/TBR1/GBX2/NEUROD1/OTX1/NKX2-1/NTF4/MYF5/CDX2/HELT/BARX1/FOXG1/LHX1/TBX18/RIPPLY2/DCANP1/TP63/IRX1/TBX1/HOXC13/BMPR1B/HOXD11/DLL3/DMRTA2/XRCC2/FOXA2/WT1/NOG/HOXD10/SIX1/TBXT/EN1/MEOX2/IRX2/LMX1B/MYF6/PAX1/SEMA3A/DMRT2/MEOX1/SFRP2/HOXD13/PCDH8/DLX1/WNT8B/WNT7A/CER1/HOXD3/NOTO/CRB2/WNT7B/FOXH1/WNT2/TCF15/TDRD5/FGF1/FOXD1/GPR161/RIPPLY1/NKD1/SIX2/DKK1/LEF1/…
GOBP_MITOTIC_NUCLEAR_DIVISION	GOBP_MITOTIC_NUCLEAR_DIVISION	296	0.496493	1.38627	0.0138889	1	1	16303	tags=29%, list=29%, signal=21%	DMRT1/UBE2DNL/KIF14/SMC1B/KIF4B/EPGN/NEK2/TTK/KIF18B/CENPK/PKMYT1/CDC25C/SGO1/KIF18A/CDC6/KIF4A/NCAPG/NUF2/HASPIN/CENPF/DLGAP5/INS/BUB1/MYBL2/BUB1B/CENPE/ANLN/RAD21L1/MKI67/KIF11/NDC80/CDCA5/NCAPH/CDK1/FBXO43/AURKB/CDT1/TPX2/KIFC1/HECW2/KIF2C/MAD2L1/CCNB2/PLK1/CDC14C/PTTG1/SGO2/UBE2C/PRC1/DSCC1/MTBP/KIF20B/CDCA8/CDC20/IGF2/CHEK1/ESPL1/TRIP13/KIF23/PTTG2/CCNB1/IL1A/SMC4/NCAPG2/BMP7/HOXA13/KIF25/NU…
GOBP_MESENCHYME_DEVELOPMENT	GOBP_MESENCHYME_DEVELOPMENT	284	0.497239	1.38344	0.0140845	1	1	14098	tags=23%, list=25%, signal=17%	TSPY2/TSPY8/TSPY10/ISL1/GATA4/TSPY1/TBX20/TBX5/FOXA1/GBX2/HAND1/TSPY3/NKX2-1/FOXF2/TBX1/DLL3/PHOX2B/GATA3/HAND2/FOXA2/WT1/NOG/SERPINB3/ERBB4/SIX1/BMP5/SIX4/HMGA2/MIR149/AMH/FAM83D/PAX1/SEMA3A/AMELX/MEOX1/SFRP2/IL6/SPRED3/ZNF750/ACTG2/CER1/CRB2/FOXH1/WNT2/TCF15/FOXD1/TWIST1/SIX2/MIR222/LEF1/HEY1/RANBP3L/BMP7/KITLG/SEMA3C/EZH2/ALX1/GATA5/WNT3A/TGFB2/GREM1/LOXL2/SEMA3F/RET/CYP26C1
GOBP_CHROMATIN_ASSEMBLY_OR_DISASSEMBLY	GOBP_CHROMATIN_ASSEMBLY_OR_DISASSEMBLY	216	0.533025	1.47821	0.0147059	1	1	10320	tags=18%, list=18%, signal=14%	H2AB2/TSPY2/TSPY8/TSPY10/TSPY1/TNP1/TSPY3/PRDM9/H2BC14/H2BW1/FAM172BP/H2BW2/CENPI/HJURP/CENPK/H3C7/H2BC10/H1-3/H2BU1/CENPA/H3C10/HELLS/HMGA2/H2BS1/CHAF1B/OIP5/ASF1B/H2BC7/H2AB3/KNL1/H3C15/CENPU/H2BC9/CENPM/H2BC13/H1-4/CENPH/H2BC17
GOBP_DEVELOPMENT_OF_PRIMARY_SEXUAL_CHARACTERISTICS	GOBP_DEVELOPMENT_OF_PRIMARY_SEXUAL_CHARACTERISTICS	217	0.523547	1.45228	0.0147059	1	1	9937	tags=17%, list=18%, signal=14%	TSPY2/TSPY8/TSPY10/GATA4/TSPY1/BMP15/NR5A1/SPO11/ZFP42/DMRT1/LHX8/TSPY3/NKX2-1/TEX19/FOXL2/BRIP1/DACH2/BMPR1B/MAS1/PCYT1B/STAR/GATA3/KIF18A/WT1/RXFP2/SIX4/NHLH2/RAD21L1/AMH/INHA/BRCA2/SEMA3A/TFAP2C/SFRP2/FGF9/CBX2/FANCA
GOBP_NUCLEAR_CHROMOSOME_SEGREGATION	GOBP_NUCLEAR_CHROMOSOME_SEGREGATION	271	0.502678	1.39045	0.0147059	1	1	14573	tags=29%, list=26%, signal=22%	C14orf39/SPO11/PRDM9/FMN2/UBE2DNL/HORMAD1/KIF14/BRIP1/SMC1B/ESCO2/KIF4B/NEK2/TTK/KIF18B/CENPK/RMI2/SGO1/KIF18A/SPATA22/CDC6/KIF4A/NCAPG/NUF2/HASPIN/CENPF/DLGAP5/TERB2/EME1/BUB1/BUB1B/CENPE/TOP2A/RAD21L1/TEX15/NDC80/CDCA5/NCAPH/AURKB/CDT1/FAM83D/KIFC1/KNL1/HECW2/KIF2C/SYCE2/CCNE1/MAD2L1/PLK1/SYCP2/PTTG1/SGO2/UBE2C/ANKRD31/PRC1/DSCC1/CDCA8/CDC20/MEIOB/FANCD2/ESPL1/CCNE2/TRIP13/KIF23/PTTG2/CCNB1/SMC…
GOCC_CONDENSED_CHROMOSOME	GOCC_CONDENSED_CHROMOSOME	216	0.486348	1.34877	0.0147059	1	1	14129	tags=28%, list=25%, signal=21%	C14orf39/FAM9C/CDX2/FAM9A/HORMAD1/SMC1B/NEK2/HJURP/CENPK/ERCC6L/SKA1/SGO1/FAM9B/NCAPG/NUF2/CENPF/RAD51/BUB1/CENPA/SKA3/BUB1B/CENPE/BIRC5/TOP2A/BLM/RAD21L1/MKI67/NDC80/AURKB/CDT1/BRCA2/KNL1/KIF2C/SYCE2/ESRRB/BRCA1/SPC24/CENPU/MAD2L1/PLK1/SYCP2/SGO2/CENPM/SPC25/CENPH/FANCD2/CHEK1/SYN1/CCNB1/HORMAD2/HSPA2/RAD9B/ZWILCH/RSPH1/CENPW/KNTC1/SPDL1/CENPN/DMC1/ZWINT
GOBP_CELL_FATE_SPECIFICATION	GOBP_CELL_FATE_SPECIFICATION	88	0.607734	1.54284	0.0149254	1	1	9413	tags=30%, list=17%, signal=25%	ISL1/SOX1/LHX3/TBX20/TBX5/FOXA1/DMRT3/TBR1/POU4F1/TBX4/TBX22/TBX18/TBX1/TLX3/DMRTA2/FOXA2/HOXD10/SIX1/TBX15/TBXT/MYT1L/ISL2/SFRP2/OLIG2/ATOH1/MNX1
GOBP_NUCLEOSOME_ASSEMBLY	GOBP_NUCLEOSOME_ASSEMBLY	141	0.558131	1.51324	0.0149254	1	1	10320	tags=23%, list=18%, signal=19%	H2AB2/TSPY2/TSPY8/TSPY10/TSPY1/TSPY3/H2BC14/H2BW1/H2BW2/CENPI/HJURP/CENPK/H3C7/H2BC10/H1-3/H2BU1/CENPA/H3C10/H2BS1/CHAF1B/OIP5/ASF1B/H2BC7/H2AB3/KNL1/H3C15/CENPU/H2BC9/CENPM/H2BC13/H1-4/CENPH/H2BC17
GOBP_SEX_DIFFERENTIATION	GOBP_SEX_DIFFERENTIATION	262	0.504219	1.38308	0.0149254	1	1	9970	tags=19%, list=18%, signal=16%	TSPY2/TSPY8/TSPY10/GATA4/TSPY1/BMP15/NR5A1/SPO11/ZFP42/DMRT1/DMRT3/LHX8/TSPY3/NKX2-1/TEX19/LHX1/FOXL2/FOXF2/DCANP1/BRIP1/TP63/DACH2/BMPR1B/DMRTA2/MAS1/PCYT1B/STAR/CENPI/GATA3/KIF18A/WT1/RXFP2/SIX4/NHLH2/WNT9B/RAD21L1/AMH/INHA/BRCA2/SEMA3A/TFAP2C/DMRT2/SFRP2/TYRO3/HOXD13/FGF9/SYCP2/CBX2/WNT7A/FANCA/STRA6
GOBP_TRNA_THREONYLCARBAMOYLADENOSINE_METABOLIC_PROCESS	GOBP_TRNA_THREONYLCARBAMOYLADENOSINE_METABOLIC_PROCESS	17	0.86383	1.73273	0.0149254	1	1	4148	tags=18%, list=7%, signal=16%	CTAG2/CTAG1A/CTAG1B
GOCC_RESPIRATORY_CHAIN_COMPLEX	GOCC_RESPIRATORY_CHAIN_COMPLEX	87	0.577762	1.45572	0.0149254	1	1	914	tags=1%, list=2%, signal=1%	COX7B2
HP_ABNORMAL_URINE_PH	HP_ABNORMAL_URINE_PH	87	0.593036	1.4942	0.0149254	1	1	143	tags=1%, list=0%, signal=1%	MT-TK
HP_ABNORMALITY_OF_FEMALE_EXTERNAL_GENITALIA	HP_ABNORMALITY_OF_FEMALE_EXTERNAL_GENITALIA	142	0.529993	1.43556	0.0149254	1	1	11214	tags=16%, list=20%, signal=13%	ISL1/CYP11B1/GATA4/NR5A1/DMRT3/ECEL1/GAD1/TP63/ESCO2/CDC6/WT1/CDC45/TBX15/ORC6/PRDM16/TWIST2/CDT1/MAGEL2/ORC1/GABRD/OCA2/POC1A/NPAP1
HP_PATENT_DUCTUS_ARTERIOSUS	HP_PATENT_DUCTUS_ARTERIOSUS	260	0.467098	1.28219	0.0149254	1	1	10606	tags=11%, list=19%, signal=9%	SIX6/GATA4/ZIC3/TBX5/TBX4/TFAP2B/NKX2-5/GJA8/BRIP1/TP63/TBX1/ESCO2/KCNH1/XRCC2/WT1/RAD51/FANCB/PRDM16/LMX1B/BRCA2/CHRM3/BRCA1/GABRD/LOX/FANCA/STRA6/FANCI/IGF2/FANCD2
GOBP_EMBRYONIC_ORGAN_MORPHOGENESIS	GOBP_EMBRYONIC_ORGAN_MORPHOGENESIS	276	0.495039	1.36497	0.0151515	1	1	7851	tags=15%, list=14%, signal=13%	GATA4/ZIC3/TBX20/TFAP2A/TBR1/HMX3/HMX2/GBX2/SLITRK6/HAND1/NEUROD1/OTX1/SHOX2/ZIC1/MYO3B/TBX22/NKX2-5/MYF5/MMP16/RYR2/FOXG1/LHX1/FOXE1/NKX3-2/POU3F4/TBX18/FOXF2/DCANP1/TBX1/CLRN1/DLX6/GRHL2/GATA3/HAND2/NOG/COL2A1/HOXD10/SIX1/TBX15/GJB6/SIX4/WNT9B
GOBP_NEGATIVE_REGULATION_OF_NF_KAPPAB_TRANSCRIPTION_FACTOR_ACTIVITY	GOBP_NEGATIVE_REGULATION_OF_NF_KAPPAB_TRANSCRIPTION_FACTOR_ACTIVITY	89	0.620159	1.56516	0.0151515	1	1	472	tags=2%, list=1%, signal=2%	PYDC2/MIR16-1
GOBP_PROTEIN_DNA_COMPLEX_SUBUNIT_ORGANIZATION	GOBP_PROTEIN_DNA_COMPLEX_SUBUNIT_ORGANIZATION	276	0.492982	1.3593	0.0151515	1	1	10320	tags=16%, list=18%, signal=13%	H2AB2/TSPY2/TSPY8/TSPY10/TSPY1/TNP1/TSPY3/PRDM9/H2BC14/H2BW1/H2BW2/CENPI/HJURP/CENPK/H3C7/H2BC10/CDC45/CENPF/DLGAP5/RAD51/PIWIL1/H1-3/H2BU1/CENPA/H3C10/HELLS/CENPE/BRDT/H2BS1/CHAF1B/CDT1/OIP5/ASF1B/H2BC7/H2AB3/KNL1/H3C15/CENPU/H2BC9/CENPM/H2BC13/H1-4/CENPH/H2BC17
GOMF_LIGAND_GATED_ION_CHANNEL_ACTIVITY	GOMF_LIGAND_GATED_ION_CHANNEL_ACTIVITY	139	0.556098	1.49689	0.0151515	1	1	13362	tags=40%, list=24%, signal=30%	TRPM5/GABRG1/ASIC5/GRID2/GABRG2/GABRA2/KCNJ6/SCNN1G/CNGA3/GABRA3/GABRA4/KCNJ18/RYR2/GRIA2/GABRG3/CHRNB3/CNGB3/GLRA3/HTR3B/GABRA6/HTR3A/GABRA5/CNGB1/CHRNA5/ASIC4/CLCA2/HCN2/KCNJ1/KCNJ9/GABRA1/GRIK5/KCNJ10/GABRB2/P2RX3/TRPA1/SCNN1B/P2RX2/CNGA2/GABRD/GRIK2/GABRQ/GRID1/ASIC2/HCN4/GABRB3/CNGA1/CHRNG/GABRE/GRIK1/GRIN2B/KCNE2/CHRNB2/ASIC1/GABRR1/ABCC8
HP_ABNORMAL_OVARIAN_MORPHOLOGY	HP_ABNORMAL_OVARIAN_MORPHOLOGY	139	0.525774	1.41526	0.0151515	1	1	6961	tags=10%, list=12%, signal=9%	CYP11B1/GATA4/BMP15/NR5A1/DMRT1/TACR3/DMRT3/NDNF/KISS1/TAC3/TP63/KISS1R/WT1/STOX1
GOBP_ATRIAL_SEPTUM_MORPHOGENESIS	GOBP_ATRIAL_SEPTUM_MORPHOGENESIS	15	0.871662	1.70361	0.0153846	1	1	3444	tags=33%, list=6%, signal=31%	ISL1/GATA4/TBX20/TBX5/NKX2-5
GOBP_CARDIAC_CHAMBER_DEVELOPMENT	GOBP_CARDIAC_CHAMBER_DEVELOPMENT	151	0.512076	1.38687	0.0153846	1	1	16065	tags=29%, list=28%, signal=21%	ISL1/GATA4/TBX20/TBX5/POU4F1/HAND1/SHOX2/NKX2-5/NPY2R/RYR2/SCN5A/TBX1/KCNK2/SALL4/GRHL2/GATA3/HAND2/NOG/BMP5/SFRP2/TNNC1/TNNT2/STRA6/FOXH1/WNT2/PROX1/HEY1/COL11A1/BMP7/HOXA13/TNNI3/SEMA3C/CAV3/TGFB2/ADAMTS6/MYH6/SOX11/OVOL2/FGF8/FOXF1/SMAD6/BMP4/PTK7/FZD2
GOBP_POLY_A_PLUS_MRNA_EXPORT_FROM_NUCLEUS	GOBP_POLY_A_PLUS_MRNA_EXPORT_FROM_NUCLEUS	23	0.760828	1.60464	0.0153846	1	1	3223	tags=13%, list=6%, signal=12%	NXF2/NXF2B/NXF3
GOBP_REGULATION_OF_MIRNA_METABOLIC_PROCESS	GOBP_REGULATION_OF_MIRNA_METABOLIC_PROCESS	10	0.901295	1.64539	0.0153846	1	1	1223	tags=10%, list=2%, signal=10%	LIN28B
GOCC_CAMP_DEPENDENT_PROTEIN_KINASE_COMPLEX	GOCC_CAMP_DEPENDENT_PROTEIN_KINASE_COMPLEX	10	0.867967	1.58454	0.0153846	1	1	4689	tags=20%, list=8%, signal=18%	AKAP4/AKAP14
HP_ABNORMAL_SPEECH_PROSODY	HP_ABNORMAL_SPEECH_PROSODY	24	0.759558	1.58546	0.0153846	1	1	143	tags=4%, list=0%, signal=4%	MT-TK
HP_ABNORMALITY_OF_THE_CLITORIS	HP_ABNORMALITY_OF_THE_CLITORIS	93	0.585425	1.47509	0.0153846	1	1	11214	tags=19%, list=20%, signal=16%	ISL1/CYP11B1/GATA4/NR5A1/DMRT3/GAD1/TP63/ESCO2/CDC6/WT1/CDC45/ORC6/CDT1/MAGEL2/ORC1/OCA2/POC1A/NPAP1
HP_COMMON_ATRIUM	HP_COMMON_ATRIUM	10	0.871527	1.59104	0.0153846	1	1	1599	tags=20%, list=3%, signal=19%	GATA4/ZIC3
HP_MULTIPLE_GLOMERULAR_CYSTS	HP_MULTIPLE_GLOMERULAR_CYSTS	15	0.828123	1.61851	0.0153846	1	1	143	tags=7%, list=0%, signal=7%	MT-TK
HP_POSTNATAL_GROWTH_RETARDATION	HP_POSTNATAL_GROWTH_RETARDATION	174	0.506691	1.39031	0.0153846	1	1	13295	tags=18%, list=24%, signal=14%	SIX6/RTL1/TFAP2A/KCNJ6/FOXG1/POU3F4/BRIP1/ESCO2/TSHB/SALL4/CKAP2L/GATA3/CCBE1/KIF15/HMGA2/BUB1B/KIF20A/BLM/NALCN/COLEC10/GINS1/TNNT2/MYPN/IGF2/DLK1/GHSR/PIEZO2/KIF7/MCM4/TNNI3/TUBB3
GOBP_ATRIAL_SEPTUM_DEVELOPMENT	GOBP_ATRIAL_SEPTUM_DEVELOPMENT	22	0.77021	1.60805	0.015625	1	1	3444	tags=23%, list=6%, signal=21%	ISL1/GATA4/TBX20/TBX5/NKX2-5
GOBP_CONNECTIVE_TISSUE_REPLACEMENT	GOBP_CONNECTIVE_TISSUE_REPLACEMENT	16	0.815452	1.60661	0.015625	1	1	472	tags=6%, list=1%, signal=6%	MIR16-1
GOBP_NLRP3_INFLAMMASOME_COMPLEX_ASSEMBLY	GOBP_NLRP3_INFLAMMASOME_COMPLEX_ASSEMBLY	16	0.8884	1.75033	0.015625	1	1	180	tags=6%, list=0%, signal=6%	PYDC2
GOBP_POSITIVE_REGULATION_OF_TRANSLATION	GOBP_POSITIVE_REGULATION_OF_TRANSLATION	133	0.557998	1.4705	0.015625	1	1	3890	tags=3%, list=7%, signal=3%	MIR16-1/DAZ1/DAZ2/MIR346
GOBP_TROPHOBLAST_CELL_MIGRATION	GOBP_TROPHOBLAST_CELL_MIGRATION	16	0.848664	1.67204	0.015625	1	1	472	tags=6%, list=1%, signal=6%	MIR16-1
GOCC_RESPIRATORY_CHAIN_COMPLEX_IV	GOCC_RESPIRATORY_CHAIN_COMPLEX_IV	22	0.750747	1.56741	0.015625	1	1	914	tags=5%, list=2%, signal=4%	COX7B2
HP_ABNORMAL_PR_INTERVAL	HP_ABNORMAL_PR_INTERVAL	16	0.813887	1.60353	0.015625	1	1	6301	tags=44%, list=11%, signal=39%	NKX2-5/GABRA3/KCNJ18/CACNA1S/SLC12A3/KCNA5/SCN2B
HP_APLASIA_HYPOPLASIA_OF_THE_OPTIC_NERVE	HP_APLASIA_HYPOPLASIA_OF_THE_OPTIC_NERVE	84	0.595821	1.45949	0.015625	1	1	6833	tags=13%, list=12%, signal=12%	SIX6/LHX3/PTF1A/ZIC1/FOXG1/RSPO2/KIF14/SALL4/FOXA2/WT1/CENPF
HP_LACTICACIDURIA	HP_LACTICACIDURIA	18	0.824655	1.66125	0.015625	1	1	143	tags=6%, list=0%, signal=6%	MT-TK
HP_SEGMENTAL_PERIPHERAL_DEMYELINATION_REMYELINATION	HP_SEGMENTAL_PERIPHERAL_DEMYELINATION_REMYELINATION	21	0.785782	1.62394	0.015625	1	1	143	tags=5%, list=0%, signal=5%	MT-TK
HP_SEVERE_GLOBAL_DEVELOPMENTAL_DELAY	HP_SEVERE_GLOBAL_DEVELOPMENTAL_DELAY	180	0.587209	1.60708	0.015625	1	1	8833	tags=13%, list=16%, signal=11%	MT-TK/RTL1/NRXN1/GABRG2/GABRA2/TBR1/KCNJ6/GRM7/FOXG1/CTNND2/UNC80/KCNH1/SYT1/KIF15/FOXA2/GABBR2/DOCK3/MYT1L/GJB6/BUB1B/CNTNAP2/NTNG1/CTNNA2
GOBP_APPENDAGE_DEVELOPMENT	GOBP_APPENDAGE_DEVELOPMENT	165	0.538069	1.45053	0.015873	1	1	16034	tags=33%, list=28%, signal=24%	RAX/SP9/TBX5/TFAP2A/TBX4/SHOX2/TFAP2B/RSPO2/TP63/HOXC13/BMPR1B/DLX6/SALL4/GRHL2/HAND2/NOG/COL2A1/HOXD10/KREMEN2/EN1/RNF165/MEOX2/PITX1/SFRP2/HOXD13/RSPO4/WNT7A/CRABP2/TWIST1/DKK1/LEF1/HOXD12/ALX4/BMP7/HOXA13/SP8/PRRX1/COMP/SEMA3C/TBC1D32/RPGRIP1L/TGFB2/GREM1/SLC7A11/HOXA11/SMOC1/EVX2/PITX2/SOX11/FGF8/CYP26B1/MAP3K20/BMP4/DLX5/GLI3
GOBP_MITOTIC_SISTER_CHROMATID_SEGREGATION	GOBP_MITOTIC_SISTER_CHROMATID_SEGREGATION	164	0.578515	1.55548	0.015873	1	1	15781	tags=35%, list=28%, signal=25%	UBE2DNL/KIF14/SMC1B/KIF4B/NEK2/TTK/KIF18B/CENPK/SGO1/KIF18A/CDC6/KIF4A/NCAPG/NUF2/HASPIN/CENPF/DLGAP5/BUB1/BUB1B/CENPE/RAD21L1/NDC80/CDCA5/NCAPH/AURKB/CDT1/KIFC1/HECW2/KIF2C/MAD2L1/PLK1/PTTG1/SGO2/UBE2C/PRC1/DSCC1/CDCA8/CDC20/ESPL1/TRIP13/KIF23/PTTG2/CCNB1/SMC4/NCAPG2/KIF25/NUSAP1/KNTC1/SPDL1/ZWINT/RACGAP1/SMC2/TACC3/NCAPD3/DSN1/FBXO5/PSRC1
GOBP_NEGATIVE_REGULATION_OF_PROTEIN_CONTAINING_COMPLEX_ASSEMBLY	GOBP_NEGATIVE_REGULATION_OF_PROTEIN_CONTAINING_COMPLEX_ASSEMBLY	134	0.556272	1.46157	0.015873	1	1	5676	tags=6%, list=10%, signal=5%	PYDC2/TMOD4/ISL1/TBX20/CAPZA3/SOST/KIF14/TMSB15A
GOBP_NUCLEOSOME_ORGANIZATION	GOBP_NUCLEOSOME_ORGANIZATION	179	0.537034	1.46541	0.015873	1	1	10320	tags=21%, list=18%, signal=17%	H2AB2/TSPY2/TSPY8/TSPY10/TSPY1/TNP1/TSPY3/PRDM9/H2BC14/H2BW1/H2BW2/CENPI/HJURP/CENPK/H3C7/H2BC10/PIWIL1/H1-3/H2BU1/CENPA/H3C10/BRDT/H2BS1/CHAF1B/OIP5/ASF1B/H2BC7/H2AB3/KNL1/H3C15/CENPU/H2BC9/CENPM/H2BC13/H1-4/CENPH/H2BC17
GOBP_POSITIVE_REGULATION_OF_TRANSLATIONAL_INITIATION	GOBP_POSITIVE_REGULATION_OF_TRANSLATIONAL_INITIATION	30	0.755147	1.61958	0.015873	1	1	2107	tags=7%, list=4%, signal=6%	DAZ1/DAZ2
HP_ABNORMAL_CIRCULATING_PYRUVATE_FAMILY_AMINO_ACID_CONCENTRATION	HP_ABNORMAL_CIRCULATING_PYRUVATE_FAMILY_AMINO_ACID_CONCENTRATION	42	0.762029	1.6352	0.015873	1	1	143	tags=2%, list=0%, signal=2%	MT-TK
HP_ANKYLOBLEPHARON	HP_ANKYLOBLEPHARON	14	0.837577	1.61159	0.015873	1	1	5005	tags=14%, list=9%, signal=13%	RAX/TP63
HP_FUNCTIONAL_ABNORMALITY_OF_MALE_INTERNAL_GENITALIA	HP_FUNCTIONAL_ABNORMALITY_OF_MALE_INTERNAL_GENITALIA	212	0.485607	1.32323	0.015873	1	1	11489	tags=22%, list=20%, signal=17%	VCY/RBMY1A1/MC2R/DAZ1/GATA4/TSPY1/NR5A1/HSFY1/DAZ2/TACR3/DMRT3/DNAH11/KISS1/ADGRG2/TAC3/BRIP1/KISS1R/PRY/STAR/XRCC2/WT1/RPS4Y2/RAD51/FANCB/BRDT/BLM/TEX15/BRCA2/SEMA3A/BRCA1/CFAP58/SYCP2/FANCA/CATSPER1/DNAH2/TTC29/FANCI/MEIOB/FANCD2/DNAH5/POC1A/CCDC114/DNAI2/DRC1/DNAJB13/MCIDAS
GOBP_CARDIAC_ATRIUM_MORPHOGENESIS	GOBP_CARDIAC_ATRIUM_MORPHOGENESIS	29	0.738094	1.55779	0.016129	1	1	3444	tags=21%, list=6%, signal=19%	ISL1/GATA4/TBX20/TBX5/SHOX2/NKX2-5
GOBP_CARDIAC_CHAMBER_MORPHOGENESIS	GOBP_CARDIAC_CHAMBER_MORPHOGENESIS	115	0.532221	1.37254	0.016129	1	1	15698	tags=31%, list=28%, signal=23%	ISL1/GATA4/TBX20/TBX5/POU4F1/HAND1/SHOX2/NKX2-5/NPY2R/RYR2/TBX1/GRHL2/GATA3/HAND2/NOG/BMP5/SFRP2/TNNC1/TNNT2/FOXH1/WNT2/PROX1/HEY1/COL11A1/BMP7/TNNI3/SEMA3C/CAV3/TGFB2/MYH6/SOX11/OVOL2/FGF8/FOXF1/SMAD6/BMP4
GOBP_EMBRYONIC_APPENDAGE_MORPHOGENESIS	GOBP_EMBRYONIC_APPENDAGE_MORPHOGENESIS	111	0.551808	1.41337	0.016129	1	1	17487	tags=40%, list=31%, signal=27%	SP9/TBX5/TFAP2A/TBX4/SHOX2/RSPO2/TP63/DLX6/SALL4/GRHL2/HAND2/NOG/HOXD10/EN1/PITX1/SFRP2/HOXD13/WNT7A/CRABP2/TWIST1/LEF1/HOXD12/ALX4/BMP7/HOXA13/SP8/PRRX1/TBC1D32/RPGRIP1L/TGFB2/GREM1/HOXA11/FGF8/CYP26B1/MAP3K20/BMP4/DLX5/GLI3/TMEM231/FZD6/TBX2/RECK/HOXD9/GPC3
GOBP_MESODERM_DEVELOPMENT	GOBP_MESODERM_DEVELOPMENT	123	0.562208	1.46633	0.016129	1	1	13891	tags=26%, list=25%, signal=20%	TSPY2/TSPY8/TSPY10/TSPY1/TBX20/POU4F1/HAND1/TSPY3/LHX1/TP63/TBX1/DLL3/NOG/TBXT/HMGA2/AMH/MIR200C/APELA/SFRP2/TLX2/CER1/CRB2/FOXH1/TCF15/SIX2/DKK1/LEF1/BMP7/TAL1/WNT3A/MIR150/ITGA2
GOBP_STRIATED_MUSCLE_CELL_APOPTOTIC_PROCESS	GOBP_STRIATED_MUSCLE_CELL_APOPTOTIC_PROCESS	41	0.716533	1.53785	0.016129	1	1	7020	tags=17%, list=12%, signal=15%	MIR16-1/GATA4/MIR30E/NKX2-5/POU4F2/HAND2/CAMK2A
GOCC_CUL4_RING_E3_UBIQUITIN_LIGASE_COMPLEX	GOCC_CUL4_RING_E3_UBIQUITIN_LIGASE_COMPLEX	35	0.751266	1.59759	0.016129	1	1	7704	tags=11%, list=14%, signal=10%	DCAF8L2/DCAF8L1/DTL/DCAF12L2
HP_CONGENITAL_HYPOTHYROIDISM	HP_CONGENITAL_HYPOTHYROIDISM	26	0.762753	1.59708	0.016129	1	1	7611	tags=27%, list=13%, signal=23%	MC2R/NKX2-1/NKX2-5/FOXE1/TSHB/STAR/DUOX2
HP_INCREASED_CONNECTIVE_TISSUE	HP_INCREASED_CONNECTIVE_TISSUE	27	0.76292	1.58416	0.016129	1	1	143	tags=4%, list=0%, signal=4%	MT-TK
HP_INCREASED_SERUM_PYRUVATE	HP_INCREASED_SERUM_PYRUVATE	52	0.798637	1.80329	0.016129	1	1	143	tags=2%, list=0%, signal=2%	MT-TK
HP_STEREOTYPY	HP_STEREOTYPY	209	0.510879	1.39097	0.016129	1	1	10520	tags=15%, list=19%, signal=13%	NRXN1/GABRG2/TBR1/FRRS1L/FMN2/RPE65/FOXG1/GRIA2/EBF3/KIRREL3/TBX1/NLGN4X/SYT1/KIF15/NAT8L/GABRA1/CAMK2A/GABBR2/BRSK2/MYT1L/PRDM16/CNTNAP2/NTNG1/KIF1A/HECW2/KCNQ5/NEXMIF/GABRD/GRIK2/NLGN3/NTNG2/OCA2
GOBP_APPENDAGE_MORPHOGENESIS	GOBP_APPENDAGE_MORPHOGENESIS	132	0.533664	1.38836	0.0163934	1	1	17487	tags=39%, list=31%, signal=27%	SP9/TBX5/TFAP2A/TBX4/SHOX2/TFAP2B/RSPO2/TP63/BMPR1B/DLX6/SALL4/GRHL2/HAND2/NOG/COL2A1/HOXD10/EN1/RNF165/PITX1/SFRP2/HOXD13/WNT7A/CRABP2/TWIST1/LEF1/HOXD12/ALX4/BMP7/HOXA13/SP8/PRRX1/SEMA3C/TBC1D32/RPGRIP1L/TGFB2/GREM1/HOXA11/EVX2/SOX11/FGF8/CYP26B1/MAP3K20/BMP4/DLX5/GLI3/TMEM231/FZD6/TBX2/RECK/PCSK5/HOXD9/GPC3
GOBP_EAR_DEVELOPMENT	GOBP_EAR_DEVELOPMENT	202	0.48894	1.33067	0.0163934	1	1	13943	tags=28%, list=25%, signal=21%	LGR5/LHX3/TFAP2A/HMX3/OC90/HMX2/GBX2/SLITRK6/NEUROD1/OTX1/ZIC1/MYO3B/OTOL1/FOXG1/NKX3-2/POU3F4/TBX18/NOX3/DCANP1/TBX1/GABRA5/CLRN1/KCNK2/PHOX2B/DLX6/GATA3/NOG/COL2A1/SIX1/GJB6/SIX4/GABRB2/KCNK3/CALB1/ESRRB/ADGRV1/ATOH1/STRA6/LHFPL5/NTN1/FOXI1/CCNA2/TCF15/ATP8A2/TWIST1/PROX1/SIX2/COL11A1/MCM2/HOXA13/PRRX1/PLPPR4/WNT3A/RPGRIP1L/TGFB2/EPHA4/GATA2
GOMF_HEME_COPPER_TERMINAL_OXIDASE_ACTIVITY	GOMF_HEME_COPPER_TERMINAL_OXIDASE_ACTIVITY	28	0.771675	1.59747	0.0163934	1	1	914	tags=4%, list=2%, signal=4%	COX7B2
HP_FOCAL_T2_HYPERINTENSE_BASAL_GANGLIA_LESION	HP_FOCAL_T2_HYPERINTENSE_BASAL_GANGLIA_LESION	44	0.775937	1.69715	0.0163934	1	1	143	tags=2%, list=0%, signal=2%	MT-TK
GOBP_SISTER_CHROMATID_SEGREGATION	GOBP_SISTER_CHROMATID_SEGREGATION	199	0.534615	1.44355	0.0166667	1	1	15781	tags=32%, list=28%, signal=23%	UBE2DNL/HORMAD1/KIF14/SMC1B/ESCO2/KIF4B/NEK2/TTK/KIF18B/CENPK/RMI2/SGO1/KIF18A/CDC6/KIF4A/NCAPG/NUF2/HASPIN/CENPF/DLGAP5/BUB1/BUB1B/CENPE/TOP2A/RAD21L1/NDC80/CDCA5/NCAPH/AURKB/CDT1/KIFC1/HECW2/KIF2C/MAD2L1/PLK1/PTTG1/SGO2/UBE2C/PRC1/DSCC1/CDCA8/CDC20/ESPL1/TRIP13/KIF23/PTTG2/CCNB1/SMC4/NCAPG2/HORMAD2/DDX12P/KIF25/NUSAP1/KNTC1/SPDL1/ZWINT/RACGAP1/SMC2/TACC3/FEN1/NCAPD3/DSN1/FBXO5/PSRC1
HP_ABNORMAL_BASAL_GANGLIA_MRI_SIGNAL_INTENSITY	HP_ABNORMAL_BASAL_GANGLIA_MRI_SIGNAL_INTENSITY	54	0.735981	1.64296	0.0166667	1	1	1824	tags=4%, list=3%, signal=4%	MT-TK/SLC30A10
HP_ABNORMAL_SPERMATOGENESIS	HP_ABNORMAL_SPERMATOGENESIS	127	0.54867	1.42908	0.0166667	1	1	10606	tags=27%, list=19%, signal=22%	VCY/RBMY1A1/MC2R/DAZ1/GATA4/TSPY1/NR5A1/HSFY1/DAZ2/TACR3/DMRT3/KISS1/ADGRG2/TAC3/BRIP1/KISS1R/PRY/STAR/XRCC2/WT1/RPS4Y2/RAD51/FANCB/BLM/TEX15/BRCA2/SEMA3A/BRCA1/SYCP2/FANCA/CATSPER1/FANCI/MEIOB/FANCD2
HP_ABNORMALITY_OF_KREBS_CYCLE_METABOLISM	HP_ABNORMALITY_OF_KREBS_CYCLE_METABOLISM	19	0.830749	1.63863	0.0166667	1	1	143	tags=5%, list=0%, signal=5%	MT-TK
HP_ABNORMAL_CIRCULATING_CARBOHYDRATE_CONCENTRATION	HP_ABNORMAL_CIRCULATING_CARBOHYDRATE_CONCENTRATION	65	0.711051	1.62063	0.0169492	1	1	143	tags=2%, list=0%, signal=2%	MT-TK
HP_APLASIA_HYPOPLASIA_AFFECTING_THE_FUNDUS	HP_APLASIA_HYPOPLASIA_AFFECTING_THE_FUNDUS	120	0.559085	1.43886	0.0169492	1	1	6833	tags=13%, list=12%, signal=12%	SIX6/LHX3/PTF1A/HMX1/CNGA3/ZIC1/FOXG1/ABCA4/CNGB3/RSPO2/KIF14/SALL4/GNAT2/FOXA2/WT1/CENPF
GOBP_B_CELL_RECEPTOR_SIGNALING_PATHWAY	GOBP_B_CELL_RECEPTOR_SIGNALING_PATHWAY	120	-0.640211	-1.74069	0.0232558	1	1	15111	tags=65%, list=27%, signal=48%	IGHG3/LAT2/MNDA/BLNK/IGLC2/PLCL2/PTPN22/MEF2C/PIK3CD/TRBC1/PRKCB/IGHA1/IGKC/IGHV1-69/IGHV1-69D/GPS2/IGHG4/IGHV7-81/NFATC2/PTPRC/TRBC2/IGHV4-39/CD22/IGHA2/LCK/IGHV3-23/IGHV3-74/IGHV1-24/IGHV1-18/IGHV3-30/ITK/IGHV3-33/IGHV4-31/IGHM/IGHV4-34/NCKAP1L/BTK/IGHV5-51/IGHV4-59/CD79A/IGLC7/IGHV2-26/NFAM1/IGHV3-15/IGLL5/IGHV3-13/IGHV3-21/IGHV3-48/FCGR2B/IGHV3-53/IGHV3-11/IGHV1-3/IGHV3-49/IGHV4-4/IGHV2-70/IG…
GOBP_NEGATIVE_REGULATION_OF_SMOOTH_MUSCLE_CELL_PROLIFERATION	GOBP_NEGATIVE_REGULATION_OF_SMOOTH_MUSCLE_CELL_PROLIFERATION	54	-0.725209	-1.76387	0.0238095	1	1	1728	tags=9%, list=3%, signal=9%	MIR182/MIR96/MIR4632/MIR638/MIR362
GOBP_VASCULAR_ASSOCIATED_SMOOTH_MUSCLE_CELL_MIGRATION	GOBP_VASCULAR_ASSOCIATED_SMOOTH_MUSCLE_CELL_MIGRATION	32	-0.818495	-1.71288	0.0238095	1	1	1728	tags=12%, list=3%, signal=12%	MIR182/MIR448/MIR638/MIR362
GOBP_VASCULAR_ENDOTHELIAL_CELL_PROLIFERATION	GOBP_VASCULAR_ENDOTHELIAL_CELL_PROLIFERATION	38	-0.698658	-1.53634	0.0238095	1	1	1108	tags=8%, list=2%, signal=8%	MIR495/MIR329-1/MIR487B
GOCC_IMMUNOGLOBULIN_COMPLEX_CIRCULATING	GOCC_IMMUNOGLOBULIN_COMPLEX_CIRCULATING	66	-0.721551	-1.77593	0.0238095	1	1	14814	tags=91%, list=26%, signal=67%	IGLC2/IGKV3-20/TRBC1/IGHA1/IGKC/IGHV1-69/IGHV1-69D/PIGR/IGHG4/IGHV7-81/TRBC2/IGHV4-39/IGHA2/IGHV3-23/IGHV3-74/IGHV1-24/JCHAIN/IGHV1-18/IGHV3-30/IGHV3-33/IGHV4-31/IGHM/IGHV4-34/IGHV5-51/IGHV4-59/IGLC7/IGHV2-26/IGHV3-15/IGLL5/IGHV3-13/IGHV3-21/IGHV3-48/IGHV3-53/IGHV3-11/IGHV1-3/IGHV3-49/IGHV4-4/IGHV2-70/IGHV4-28/IGHV3-66/IGHV3-43/IGHV3-73/IGHV2-5/IGLC6/IGHV4-61/IGHV3-72/IGHV3-7/IGHV2-70D/IGHV1-45/I…
GOBP_MEMBRANE_INVAGINATION	GOBP_MEMBRANE_INVAGINATION	132	-0.513609	-1.42981	0.0243902	1	1	15111	tags=55%, list=27%, signal=41%	IGHG3/AIF1/IGLC2/TRBC1/ELMO1/IGHA1/IGKC/IGHV1-69/ITGB2/IGHV1-69D/RHOH/IGHG4/IGHV7-81/TRBC2/IGHV4-39/FCGR1A/ARHGAP25/IGHA2/MARCO/ITGAM/TREM2/IGHV3-23/IGHV3-74/IGHV1-24/IGHV1-18/IGHV3-30/IGHV3-33/IGHV4-31/MSR1/BIN2/IGHM/IGHV4-34/NCKAP1L/IGHV5-51/IGHV4-59/IGLC7/IGHV2-26/IGHV3-15/IGLL5/IGHV3-13/ALOX15/IGHV3-21/IGHV3-48/FCGR2B/IGHV3-53/ADGRB1/IGHV3-11/IGHV1-3/IGHV3-49/IGHV4-4/IGHV2-70/IGHV4-28/IGHV3-6…
GOBP_NEGATIVE_REGULATION_OF_SMOOTH_MUSCLE_CELL_MIGRATION	GOBP_NEGATIVE_REGULATION_OF_SMOOTH_MUSCLE_CELL_MIGRATION	28	-0.819927	-1.74314	0.0243902	1	1	1728	tags=11%, list=3%, signal=10%	MIR182/MIR638/MIR362
GOBP_REGULATION_OF_COMPLEMENT_ACTIVATION	GOBP_REGULATION_OF_COMPLEMENT_ACTIVATION	114	-0.592485	-1.57926	0.0243902	1	1	14486	tags=68%, list=26%, signal=50%	C1QA/IGKC/IGLV1-40/IGHV1-69/IGLV2-11/C5AR1/C1QC/C1QB/IGLV2-14/IGHG4/F2/IGLV3-25/IGHV4-39/C9/IGKV4-1/C4B/IGLV1-47/VSIG4/IGKV3-15/IGHV3-23/IGKV1-5/C4A/IGHV3-30/IGLV2-23/IGLV1-51/IGHV3-33/C3AR1/VTN/IGKV2D-30/IGHV4-34/IL1B/CR2/CFP/IGKV1-17/C5AR2/IGLV1-44/IGHV4-59/IGLV6-57/IGLC7/IGLV3-1/IGHV3-13/IGLV3-27/IGHV3-48/IGKV3D-20/IGLV3-19/IGHV3-53/IGLV3-21/IGKV3D-11/IGHV3-11/IGLV2-8/IGHV2-70/C7/C2/IGKV1-16/I…
GOBP_IMMUNOGLOBULIN_PRODUCTION	GOBP_IMMUNOGLOBULIN_PRODUCTION	197	-0.582322	-1.71256	0.025	1	1	11980	tags=46%, list=21%, signal=37%	IGKV1-27/IL5/IGKV3-15/SASH3/GAPT/IGKV2D-29/CD86/IGKV1-5/IGLV2-23/MZB1/IGLV1-51/CD28/IGKV1D-13/TBX21/IGKV2D-30/IGLV3-9/BTK/IGLV9-49/IGKV1-17/IGLV1-44/IGLV6-57/IGLV3-1/TRAV9-2/IGLV4-69/IGLV3-27/IGKV1-6/TRDV2/IGKV3D-20/IGLV3-19/FCGR2B/IGLV3-21/IGKV3D-11/CD40LG/IGKV1-9/IGLV2-8/IGLV1-36/IGKV1D-17/IGKV1-16/CCR6/IGLV3-10/IGLV8-61/IGKV1-8/IGKV2-30/IGLV3-12/CR1/TRAV2/IGLV5-45/IGLV7-46/IGLV1-50/IGLV3-16/IG…
GOBP_REGULATION_OF_VASCULAR_ASSOCIATED_SMOOTH_MUSCLE_CELL_PROLIFERATION	GOBP_REGULATION_OF_VASCULAR_ASSOCIATED_SMOOTH_MUSCLE_CELL_PROLIFERATION	72	-0.732206	-1.82943	0.025	1	1	1728	tags=8%, list=3%, signal=8%	MIR182/MIR96/MIR4632/MIR448/MIR638/MIR362
GOCC_IMMUNOGLOBULIN_COMPLEX	GOCC_IMMUNOGLOBULIN_COMPLEX	153	-0.74297	-2.06788	0.025	1	1	11820	tags=80%, list=21%, signal=63%	IGKV1-27/IGKV3-15/IGHV3-23/IGKV2D-29/IGHV3-74/IGHV1-24/IGKV1-5/JCHAIN/IGHV1-18/IGHV3-30/IGLV2-23/IGLV1-51/IGHV3-33/IGHV4-31/IGKV1D-13/IGHM/IGKV2D-30/IGHV4-34/IGLV3-9/IGLV9-49/IGKV1-17/IGHV5-51/IGLV1-44/IGHV4-59/IGLV6-57/CD79A/IGLC7/IGLV3-1/IGHV2-26/IGHV3-15/IGLL5/IGHV3-13/IGLV4-69/IGLV3-27/IGKV1-6/IGHV3-21/IGHV3-48/IGKV3D-20/IGLV3-19/IGHD1-1/IGHV3-53/IGLV3-21/IGKV3D-11/IGHV3-11/IGHV1-3/IGHV3-49/I…
GOMF_ANTIGEN_BINDING	GOMF_ANTIGEN_BINDING	153	-0.626483	-1.74367	0.025	1	1	14885	tags=69%, list=26%, signal=51%	CD1E/IGLC2/IGKV3-20/TRBC1/IGHA1/IGKC/IGLV1-40/IGHV1-69/IGLV2-11/IGHV1-69D/TRBV12-3/IGLV2-14/IGHG4/IGHV7-81/TRBC2/TRAV19/SLC7A8/HLA-DQA1/IGLV3-25/IGHV4-39/IGHA2/IGKV4-1/IGLV1-47/IGKV3-15/IGHV3-23/IGHV3-74/IGHV1-24/IGKV1-5/JCHAIN/IGHV1-18/IGHV3-30/IGLV2-23/IGLV1-51/IGHV3-33/IGHV4-31/IGHM/ABO/IGHV4-34/CD48/IGKV1-17/IGHV5-51/IGLV1-44/IGHV4-59/IGLV6-57/IGLC7/IGLV3-1/IGHV2-26/IGHV3-15/IGLL5/IGHV3-13/FC…
GOMF_IMMUNOGLOBULIN_RECEPTOR_BINDING	GOMF_IMMUNOGLOBULIN_RECEPTOR_BINDING	68	-0.717192	-1.75907	0.025	1	1	14814	tags=88%, list=26%, signal=65%	IGLC2/TRBC1/IGHA1/IGKC/IGHV1-69/IGHV1-69D/IGHG4/IGHV7-81/TRBC2/IGHV4-39/IGHA2/IGHV3-23/IGHV3-74/IGHV1-24/JCHAIN/IGHV1-18/IGHV3-30/IGHV3-33/IGHV4-31/IGHM/IGHV4-34/FGR/IGHV5-51/IGHV4-59/IGLC7/IGHV2-26/IGHV3-15/IGLL5/IGHV3-13/IGHV3-21/IGHV3-48/IGHV3-53/IGHV3-11/IGHV1-3/IGHV3-49/IGHV4-4/IGHV2-70/TARM1/IGHV4-28/IGHV3-66/IGHV3-43/IGHV3-73/IGHV2-5/IGLC6/IGHV4-61/IGHV3-72/IGHV3-7/IGHV2-70D/IGHV1-45/IGHD/…
GOBP_ORGANELLE_FISSION	GOBP_ORGANELLE_FISSION	481	0.425749	1.24753	0.0253165	1	1	14129	tags=23%, list=25%, signal=18%	C14orf39/SPO11/DMRT1/PRDM9/FMN2/TEX19/UBE2DNL/HORMAD1/KIF14/BRIP1/SMC1B/KIF4B/EPGN/NEK2/TTK/KIF18B/CENPK/PKMYT1/CDC25C/SGO1/KIF18A/SPATA22/CDC6/KIF4A/NCAPG/NUF2/HASPIN/CENPF/DLGAP5/MND1/RAD51/TERB2/EME1/INS/BUB1/MYBL2/BUB1B/CENPE/BRDT/TOP2A/ANLN/RAD21L1/TEX15/MKI67/KIF11/NDC80/CDCA5/NCAPH/CDK1/FBXO43/AURKB/CDT1/PLCB1/TPX2/KIFC1/BRCA2/HECW2/RAD54L/KIF2C/SYCE2/CCNA1/CCNE1/MAD2L1/CCNB2/PLK1/CDC14C/S…
[truncated: 4,330 more rows]
