# Supplementary material for: RecQ mediated genome instability 2 (RMI2): a potential prognostic and immunological biomarker for pan-cancers
Source: Aging (Albany NY). 2022 May 12;14(9):4107–36. doi: 10.18632/aging.204076 (PMC9134953; doi:10.18632/aging.204076)
Supplement: Supplementary Table 12 [file aging-14-204076-s010.xls]

## Sheet: Table 12
Supplementary Table 12. Detailed information on the enrichment of KEGG pathway in various tumor types.
ACC
ID	Description	setSize	enrichmentScore	NES	pvalue	p.adjust	qvalues	rank	leading_edge	core_enrichment
KEGG_OLFACTORY_TRANSDUCTION	KEGG_OLFACTORY_TRANSDUCTION	383	0.498563	1.3059	0.0229885	0.645833	0.645833	5687	tags=23%, list=10%, signal=21%	OR6C74/OR6C6/OR10G7/OR6C1/OR6B2/OR5M11/OR5AU1/OR9G1/OR14C36/OR52E6/OR6C2/OR10A7/OR5I1/OR4D6/OR1L1/OR52L1/OR9Q2/OR56A5/OR4N5/OR4K14/OR4K2/OR8B12/OR2A12/OR13C4/OR10A3/OR6S1/OR9G4/OR4K1/OR4L1/OR7C2/OR52A1/OR7D4/OR4F15/OR5M3/OR5H2/OR7G1/OR1L6/OR6C76/OR4D9/OR2G6/OR1E2/OR4F6/OR56A3/OR5AP2/OR8B8/OR4C45/OR1M1/OR2J3/OR6C75/OR10H5/OR5L1/OR4K5/OR5M9/OR8H3/OR5D18/OR4E2/OR4A5/OR14J1/OR1B1/OR5T2/OR4C13/OR6C3/O…
KEGG_METABOLISM_OF_XENOBIOTICS_BY_CYTOCHROME_P450	KEGG_METABOLISM_OF_XENOBIOTICS_BY_CYTOCHROME_P450	69	-0.59026	-1.51664	0.025641	0.645833	0.645833	8232	tags=49%, list=15%, signal=42%	UGT2B11/CYP2S1/CYP3A5/UGT2B4/GSTM5/CYP2C8/GSTM1/ALDH3B1/AKR1C2/GSTA1/GSTA5/GSTA2/UGT2A1/UGT1A10/CYP3A7/ADH1C/ADH1B/UGT2A3/ALDH3B2/ADH6/UGT2B28/CYP3A4/UGT2B7/ADH4/UGT2B17/UGT1A9/UGT1A6/ADH1A/UGT1A7/UGT2B15/UGT1A8/UGT1A4/UGT1A1/UGT1A3
KEGG_PORPHYRIN_AND_CHLOROPHYLL_METABOLISM	KEGG_PORPHYRIN_AND_CHLOROPHYLL_METABOLISM	41	-0.745315	-1.7952	0.0263158	0.645833	0.645833	4786	tags=37%, list=8%, signal=34%	FTMT/UGT2A1/UGT1A10/UGT2A3/UGT2B28/UGT2B7/UGT2B17/UGT1A9/UGT1A6/UGT1A7/UGT2B15/UGT1A8/UGT1A4/UGT1A1/UGT1A3
KEGG_PENTOSE_AND_GLUCURONATE_INTERCONVERSIONS	KEGG_PENTOSE_AND_GLUCURONATE_INTERCONVERSIONS	28	-0.747876	-1.6496	0.027027	0.645833	0.645833	4626	tags=50%, list=8%, signal=46%	UGT2A1/UGT1A10/UGT2A3/UGT2B28/UGT2B7/UGT2B17/UGT1A9/UGT1A6/UGT1A7/UGT2B15/UGT1A8/UGT1A4/UGT1A1/UGT1A3
KEGG_DRUG_METABOLISM_CYTOCHROME_P450	KEGG_DRUG_METABOLISM_CYTOCHROME_P450	71	-0.615484	-1.60082	0.0277778	0.645833	0.645833	8232	tags=55%, list=15%, signal=47%	UGT2B11/CYP3A5/UGT2B4/MAOB/CYP2A6/GSTM5/FMO5/CYP2A7/CYP2C8/GSTM1/ALDH3B1/GSTA1/GSTA5/GSTA2/FMO3/CYP2A13/UGT2A1/UGT1A10/CYP3A7/FMO2/ADH1C/ADH1B/UGT2A3/ALDH3B2/ADH6/UGT2B28/CYP3A4/UGT2B7/ADH4/UGT2B17/UGT1A9/UGT1A6/ADH1A/UGT1A7/UGT2B15/UGT1A8/UGT1A4/UGT1A1/UGT1A3
KEGG_DRUG_METABOLISM_OTHER_ENZYMES	KEGG_DRUG_METABOLISM_OTHER_ENZYMES	51	-0.641047	-1.55044	0.0277778	0.645833	0.645833	8232	tags=51%, list=15%, signal=44%	UGT2B11/CYP3A5/UGT2B4/CYP2A6/CYP2A7/UPP2/DPYS/UPB1/CYP2A13/UGT2A1/UGT1A10/CYP3A7/UGT2A3/CES1/UGT2B28/CYP3A4/UGT2B7/UGT2B17/UGT1A9/UGT1A6/UGT1A7/UGT2B15/UGT1A8/UGT1A4/UGT1A1/UGT1A3
KEGG_STEROID_HORMONE_BIOSYNTHESIS	KEGG_STEROID_HORMONE_BIOSYNTHESIS	55	-0.636936	-1.58171	0.0277778	0.645833	0.645833	8232	tags=47%, list=15%, signal=40%	UGT2B11/CYP3A5/UGT2B4/CYP7A1/CYP7B1/AKR1C2/HSD17B6/HSD11B1/CYP11B2/UGT2A1/AKR1D1/UGT1A10/CYP3A7/UGT2A3/UGT2B28/CYP3A4/UGT2B7/UGT2B17/UGT1A9/UGT1A6/UGT1A7/UGT2B15/UGT1A8/UGT1A4/UGT1A1/UGT1A3
KEGG_STARCH_AND_SUCROSE_METABOLISM	KEGG_STARCH_AND_SUCROSE_METABOLISM	52	-0.707088	-1.6923	0.030303	0.645833	0.645833	4626	tags=33%, list=8%, signal=30%	UGT2A1/UGT1A10/UGT2A3/UGT2B28/AMY2A/UGT2B7/AMY1A/UGT2B17/UGT1A9/UGT1A6/UGT1A7/G6PC/UGT2B15/UGT1A8/UGT1A4/UGT1A1/UGT1A3
KEGG_RETINOL_METABOLISM	KEGG_RETINOL_METABOLISM	64	-0.592095	-1.43971	0.03125	0.645833	0.645833	8232	tags=55%, list=15%, signal=47%	UGT2B11/CYP3A5/UGT2B4/ALDH1A1/CYP26A1/CYP2A6/CYP2A7/CYP2C8/ALDH1A2/CYP4A11/RDH12/CYP2A13/UGT2A1/UGT1A10/RDH8/CYP3A7/ADH1C/ADH1B/UGT2A3/ADH6/UGT2B28/CYP3A4/UGT2B7/ADH4/UGT2B17/UGT1A9/CYP4A22/UGT1A6/ADH1A/UGT1A7/UGT2B15/UGT1A8/UGT1A4/UGT1A1/UGT1A3
BLCA
ID	Description	setSize	enrichmentScore	NES	pvalue	p.adjust	qvalues	rank	leading_edge	core_enrichment
KEGG_CELL_CYCLE	KEGG_CELL_CYCLE	124	0.514922	1.51555	0.0232558	1	1	18216	tags=52%, list=32%, signal=36%	SMC1B/CDKN2A/CCNE2/E2F2/CDC25C/CDKN2B/E2F1/ORC1/ESPL1/CHEK1/PKMYT1/CDC7/CDC25A/CDC45/MAD2L1/TTK/PLK1/CCNB3/MCM2/CDC6/ORC6/RBL1/BUB1B/CDKN2C/CCNE1/BUB1/CCNB2/CCNA2/MCM6/CDC20/CDK1/E2F3/MCM5/CDK2/SKP2/DBF4/PTTG1/GADD45G/WEE2/CDC25B/MCM4/MAD2L2/CDKN2D/PCNA/CCNB1/MCM7/MCM3/E2F5/CHEK2/SMC1A/STAG2/CDKN1C/CDK4/MAD1L1/TFDP1/SMC3/ANAPC2/CDKN1B/ANAPC11/TFDP2/STAG1/HDAC2/ANAPC10/WEE1/RAD21
KEGG_OLFACTORY_TRANSDUCTION	KEGG_OLFACTORY_TRANSDUCTION	383	0.42655	1.42138	0.0384615	1	1	5260	tags=27%, list=9%, signal=25%	OR4K17/OR10H3/OR5D18/OR10G4/OR8J3/OR4K5/OR2T12/OR1S1/OR51A2/OR51L1/OR4C13/OR5L2/OR6Q1/OR8H3/OR5AR1/OR5M1/OR51G1/OR4C46/OR1A2/OR14C36/OR7D4/OR9G4/OR2T6/OR4C15/OR7E24/OR52M1/OR2T34/OR5M9/OR52A1/OR10H4/OR4K15/OR1E2/OR2AT4/OR5M10/OR4A5/OR51S1/OR4B1/OR5B3/OR51T1/OR10J5/OR4C6/OR8K5/OR1I1/OR2Z1/OR4X2/OR5T1/OR14I1/OR4L1/CLCA1/OR5D14/OR4D11/OR2M7/OR2T1/OR6Y1/OR8H2/OR9Q2/OR51A7/OR10G3/OR1D4/OR7G3/OR4A16/OR…
BRCA
ID	Description	setSize	enrichmentScore	NES	pvalue	p.adjust	qvalues	rank	leading_edge	core_enrichment
KEGG_OLFACTORY_TRANSDUCTION	KEGG_OLFACTORY_TRANSDUCTION	383	-0.631618	-1.43421	0.00990099	1	1	12873	tags=56%, list=23%, signal=44%	OR5P2/OR2M3/OR52J3/OR6K3/OR2M2/OR8D1/OR2T34/OR51F2/OR2B11/OR2A25/OR2A14/OR10H5/OR10J3/OR2T3/OR52I2/OR5AN1/OR2T6/OR2L2/OR10S1/OR1C1/OR52I1/OR11H6/OR2Z1/OR1K1/OR4K2/OR12D2/OR1S2/OR1N1/OR4K13/OR5J2/OR14I1/OR1I1/OR2M4/OR51G2/OR2W1/OR10H2/OR2V2/OR5AC2/OR7G2/OR5AP2/OR5B21/OR4D1/OR2AE1/OR10R2/OR2T29/OR4M2/OR2G6/OR4P4/OR14A16/OR2L13/OR2H1/OR51V1/OR4E2/OR13C3/OR10H4/OR6C70/OR1L3/OR6A2/OR13F1/OR5C1/OR51I1/…
CESC
ID	Description	setSize	enrichmentScore	NES	pvalue	p.adjust	qvalues	rank	leading_edge	core_enrichment
KEGG_NEUROACTIVE_LIGAND_RECEPTOR_INTERACTION	KEGG_NEUROACTIVE_LIGAND_RECEPTOR_INTERACTION	271	-0.534774	-1.40616	0.0120482	1	1	10425	tags=32%, list=18%, signal=27%	CHRNA6/GABBR2/TBXA2R/HTR1D/GRIA3/GHSR/GRIK1/P2RX1/PRSS2/GRIK5/CNR1/P2RX2/MC5R/GABRB2/CHRNA9/ADRA1B/GLRA1/MAS1/GABRG3/GRM6/GRID2/GABRB1/TSHB/LEP/LPAR4/HRH2/SCTR/HTR4/NTSR1/FPR2/PTGER3/F2/SSTR1/CHRNA1/NPY4R/TAAR5/GRIA4/RXFP1/NPY5R/DRD5/GALR1/HTR1B/PRSS1/UTS2R/NPY1R/MTNR1A/GLP2R/GRIA2/KISS1R/CHRNA4/GRIK3/TSHR/AGTR2/GABRG1/HTR2A/CHRNA2/GPR83/OPRK1/HTR2C/ADRA1A/GABRA5/CHRM5/GRM3/ADCYAP1R1/MCHR1/HCRTR2…
KEGG_MATURITY_ONSET_DIABETES_OF_THE_YOUNG	KEGG_MATURITY_ONSET_DIABETES_OF_THE_YOUNG	25	-0.727052	-1.39836	0.0149254	1	1	9362	tags=52%, list=17%, signal=43%	NKX2-2/PDX1/NR5A2/BHLHA15/SLC2A2/HNF1B/NEUROD1/FOXA2/NEUROG3/PKLR/IAPP/INS/PAX4
KEGG_REGULATION_OF_ACTIN_CYTOSKELETON	KEGG_REGULATION_OF_ACTIN_CYTOSKELETON	213	-0.50379	-1.30711	0.0246914	1	1	16270	tags=23%, list=29%, signal=16%	PDGFRA/MYH10/FGFR1/PIK3R5/F2R/PDGFC/ITGA4/CHRM4/ITGA5/PDGFRB/ITGA9/PDGFB/ACTN3/MYLK/ITGA11/CHRM3/MYL10/PIK3CG/FGF2/PIP5K1B/FGF22/FGFR4/FN1/ACTN2/FGF18/FGF7/ITGA1/FGF16/FGF6/MYL2/FGF13/PAK5/TMSB4Y/FGF10/FGF8/F2/FGF5/ITGB3/CHRM5/FGF9/FGF21/FGF19/CHRM2/INS/MOS/FGF20/FGF23/FGF3/FGF4
KEGG_MELANOMA	KEGG_MELANOMA	71	-0.624982	-1.46039	0.0394737	1	1	12387	tags=24%, list=22%, signal=19%	CCND1/FGF18/CDK6/FGF7/FGF16/FGF6/FGF13/FGF10/FGF8/FGF5/FGF9/FGF21/FGF19/FGF20/FGF23/FGF3/FGF4
COAD
ID	Description	setSize	enrichmentScore	NES	pvalue	p.adjust	qvalues	rank	leading_edge	core_enrichment
KEGG_RIG_I_LIKE_RECEPTOR_SIGNALING_PATHWAY	KEGG_RIG_I_LIKE_RECEPTOR_SIGNALING_PATHWAY	71	-0.665651	-1.32965	0.02	1	1	4507	tags=13%, list=8%, signal=12%	IFNA13/IFNA6/IFNK/IFNA16/IFNA7/IFNA2/IFNA8/IFNA10/IFNA17
KEGG_CYTOSOLIC_DNA_SENSING_PATHWAY	KEGG_CYTOSOLIC_DNA_SENSING_PATHWAY	55	-0.678597	-1.3367	0.0206186	1	1	4507	tags=15%, list=8%, signal=13%	IFNA13/IFNA6/IFNA16/IFNA7/IFNA2/IFNA8/IFNA10/IFNA17
DLBC
ID	Description	setSize	enrichmentScore	NES	pvalue	p.adjust	qvalues	rank	leading_edge	core_enrichment
KEGG_OLFACTORY_TRANSDUCTION	KEGG_OLFACTORY_TRANSDUCTION	383	0.710788	1.26485	0.00990099	1	1	9740	tags=46%, list=17%, signal=39%	OR2A4/OR56A3/OR2G2/OR4D2/OR8U1/OR10G4/OR8H2/OR2M7/OR10G3/OR1A1/OR10G7/OR4B1/OR4A5/OR5AU1/OR10H4/OR9G1/OR10G8/OR6K2/OR5M10/OR8D1/OR2M3/OR4K5/OR5M9/OR51B6/OR10Z1/OR8H3/OR10G9/OR8H1/OR5T1/OR1C1/OR4S2/OR13C9/OR1D5/OR4S1/OR5AP2/OR4C12/OR4C15/OR4C11/OR8J1/OR4A15/OR5AC2/OR5J2/OR8G2P/OR5D16/OR2T33/OR6C68/OR8K5/OR1L6/OR6C76/OR4C13/OR2F2/OR2T8/OR1A2/OR14C36/OR6C70/OR12D3/OR5F1/OR7D4/OR6C1/OR52K2/OR8G1/OR6K…
ESCA
ID	Description	setSize	enrichmentScore	NES	pvalue	p.adjust	qvalues	rank	leading_edge	core_enrichment
KEGG_OLFACTORY_TRANSDUCTION	KEGG_OLFACTORY_TRANSDUCTION	383	0.72508	1.53463	0.00990099	1	1	10151	tags=62%, list=18%, signal=52%	OR5AR1/OR8H3/OR2T11/OR4A15/OR4S2/OR5L2/OR5L1/OR5M8/OR4C45/OR4C15/OR2T12/OR5M10/OR5M1/OR6K6/OR5I1/OR10Z1/OR4C11/OR4P4/OR2W1/OR4C46/OR51L1/OR14J1/OR52E2/OR52A5/OR10J3/OR6N2/OR5D18/OR14C36/OR6C4/OR51B2/OR6C68/OR4N2/OR52E8/OR4K13/OR2M4/OR6C6/OR10H3/OR6Y1/OR4L1/OR2F2/OR6X1/OR4K14/OR4F15/OR8I2/OR4X2/OR13C4/OR6N1/OR51M1/OR5F1/OR4D6/OR51V1/OR8U1/OR8J1/OR5AC2/OR2M5/OR4K5/OR10K1/OR52J3/OR10T2/OR10J5/OR13C2…
GBM
ID	Description	setSize	enrichmentScore	NES	pvalue	p.adjust	qvalues	rank	leading_edge	core_enrichment
KEGG_REGULATION_OF_AUTOPHAGY	KEGG_REGULATION_OF_AUTOPHAGY	34	0.819439	1.59336	0.0147059	1	1	6297	tags=35%, list=11%, signal=31%	IFNA7/IFNA17/IFNA10/INS/IFNA4/IFNA14/BECN2/IFNA8/IFNA1/IFNG/IFNA5/IFNA6
KEGG_NOD_LIKE_RECEPTOR_SIGNALING_PATHWAY	KEGG_NOD_LIKE_RECEPTOR_SIGNALING_PATHWAY	62	-0.636414	-1.48598	0.027027	1	1	12032	tags=44%, list=21%, signal=34%	PYCARD/CASP1/IL6/CARD9/MEFV/PYDC1/TNFAIP3/CASP8/MAPK13/CCL5/CARD6/NLRP3/IL18/NLRC4/CCL2/NOD2/IL1B/CXCL2/PSTPIP1/CXCL1/CXCL8/CASP5/CCL8/TNF/NAIP/BIRC3/CCL7
KEGG_RIG_I_LIKE_RECEPTOR_SIGNALING_PATHWAY	KEGG_RIG_I_LIKE_RECEPTOR_SIGNALING_PATHWAY	71	0.707538	1.48166	0.047619	1	1	6420	tags=18%, list=11%, signal=16%	IFNA7/IFNA17/IFNA10/IFNA4/IFNA14/IFNA8/IFNK/IFNA1/IFNW1/IFNA5/IFNE/IFNA6/IFNB1
HNSC
ID	Description	setSize	enrichmentScore	NES	pvalue	p.adjust	qvalues	rank	leading_edge	core_enrichment
KEGG_OLFACTORY_TRANSDUCTION	KEGG_OLFACTORY_TRANSDUCTION	383	0.521569	1.26568	0.00990099	1	1	12930	tags=45%, list=23%, signal=35%	OR5M9/OR2T6/OR51G1/OR4P4/OR4C11/OR11H1/OR8D2/OR10R2/OR5L1/OR2AG1/OR4S2/OR10AG1/OR52E2/OR5I1/OR8B8/OR4C13/OR52A5/OR10G7/OR5H2/OR5AR1/OR10K2/OR6Q1/OR8H1/OR5D14/OR51L1/OR4X2/OR7A17/OR6X1/OR8K5/OR7A10/OR5M3/OR5A1/OR6C6/OR5M8/OR2T29/OR1N2/OR10K1/OR8D1/OR1N1/OR8K1/OR5AK2/OR5AS1/OR52K1/OR8U1/OR5D16/OR10A5/OR4A5/OR2V2/OR13C9/OR10T2/OR13G1/OR14A16/OR1D5/OR5L2/OR4F6/OR5J2/OR10P1/OR4A15/OR7G3/OR7G2/OR13C8/O…
KICH
ID	Description	setSize	enrichmentScore	NES	pvalue	p.adjust	qvalues	rank	leading_edge	core_enrichment
KEGG_PARKINSONS_DISEASE	KEGG_PARKINSONS_DISEASE	128	0.598091	1.3262	0.0348837	1	1	6160	tags=4%, list=11%, signal=3%	COX7B2/TH/SLC18A1/COX6CP3/SLC25A31
KEGG_GRAFT_VERSUS_HOST_DISEASE	KEGG_GRAFT_VERSUS_HOST_DISEASE	37	-0.64452	-1.44086	0.04	1	1	13059	tags=65%, list=23%, signal=50%	HLA-E/HLA-DPA1/HLA-DRB5/HLA-DPB1/HLA-DMA/HLA-DQB1/HLA-DMB/HLA-F/HLA-DQA2/HLA-DOA/CD86/IFNG/PRF1/GZMB/HLA-DQA1/CD80/HLA-DOB/FASLG/TNF/IL1A/KIR3DL2/KIR3DL1/KIR2DL3/KIR2DL1
KIRC
ID	Description	setSize	enrichmentScore	NES	pvalue	p.adjust	qvalues	rank	leading_edge	core_enrichment
KEGG_OLFACTORY_TRANSDUCTION	KEGG_OLFACTORY_TRANSDUCTION	383	0.613243	1.39973	0.00990099	1	1	9322	tags=45%, list=16%, signal=38%	OR5AR1/OR6C74/OR8B4/OR52E6/OR5M10/OR5H2/OR4M2/OR4M1/OR10A6/OR2M3/OR10R2/OR51T1/OR5A2/OR4D10/OR56A1/OR51D1/OR2Z1/OR51L1/OR6C68/OR5M11/OR2B3/OR52A1/OR2G2/OR2M7/OR8K1/OR5AC2/OR5AU1/OR1B1/OR5F1/OR4C6/OR5D14/OR12D3/OR1A2/OR2F2/OR6B2/CNGB1/OR6C76/OR14J1/OR5L1/OR10G3/OR5T2/OR5L2/OR1N1/CNGA3/OR56A3/OR10J5/OR6N2/OR8B12/OR4K13/OR14A16/OR52J3/OR4C12/OR4A5/OR10G2/OR10H3/OR9G4/OR8D2/OR51A2/OR51A4/OR2G3/OR51S1…
KEGG_MATURITY_ONSET_DIABETES_OF_THE_YOUNG	KEGG_MATURITY_ONSET_DIABETES_OF_THE_YOUNG	25	0.743597	1.41761	0.0212766	1	1	9086	tags=52%, list=16%, signal=44%	NKX6-1/PDX1/MAFA/PAX4/NEUROD1/ONECUT1/FOXA2/INS/FOXA3/NEUROG3/GCK/MNX1/IAPP
KIRP
ID	Description	setSize	enrichmentScore	NES	pvalue	p.adjust	qvalues	rank	leading_edge	core_enrichment
KEGG_NEUROACTIVE_LIGAND_RECEPTOR_INTERACTION	KEGG_NEUROACTIVE_LIGAND_RECEPTOR_INTERACTION	271	0.484745	1.37267	0.0140845	1	1	12924	tags=35%, list=23%, signal=27%	HTR1E/CGA/MC2R/GH2/MC3R/GABRG1/GRID2/GABRG2/GABRA2/TACR3/GALR1/CRHR1/OPRK1/TAAR5/PRLHR/CCKAR/GLP2R/GRM7/NPY4R/GABRA3/GABRA4/NPY2R/HTR2C/AVPR2/GRIA2/GABRG3/GPR50/LPAR3/CHRNB3/GLRA3/OPRM1/NPBWR1/GABRA6/MCHR2/GABRA5/CHRM2/NMUR2/PTGFR/KISS1R/MAS1/TSHB/PRL/CHRNA5/HTR6/RXFP2/SSTR4/GABRA1/GRIK5/MC5R/GABBR2/ADRA1D/DRD2/PTGER3/GABRB2/P2RX3/HRH3/GRM1/AVPR1A/CHRM3/P2RX2/FPR2/UTS2R/GABRD/GRPR/ADCYAP1R1/GRIK2…
KEGG_CELL_CYCLE	KEGG_CELL_CYCLE	124	0.526301	1.4239	0.0447761	1	1	15105	tags=29%, list=27%, signal=21%	SMC1B/TTK/PKMYT1/CDC25C/CDC6/CDC45/E2F2/ORC6/BUB1/BUB1B/CDK1/E2F1/CCNA1/CCNE1/MAD2L1/CCNB2/ORC1/PLK1/PTTG1/CDC25A/CDC20/CHEK1/ESPL1/CCNE2/CCNA2/PTTG2/CCNB1/RBL1/MCM2/MCM4/MCM6/TGFB2/WEE1/CDC7/SKP2/DBF4
LAML
ID	Description	setSize	enrichmentScore	NES	pvalue	p.adjust	qvalues	rank	leading_edge	core_enrichment
KEGG_AUTOIMMUNE_THYROID_DISEASE	KEGG_AUTOIMMUNE_THYROID_DISEASE	50	-0.692739	-1.59093	0.0322581	1	1	8638	tags=42%, list=15%, signal=36%	IL5/HLA-DOB/PRF1/CD40/IL2/GZMB/IFNA21/CD40LG/TG/IL4/CD28/CTLA4/IFNA14/IFNA7/TPO/IL10/IFNA16/CGA/IFNA17/IFNA4/IFNA1
LGG
ID	Description	setSize	enrichmentScore	NES	pvalue	p.adjust	qvalues	rank	leading_edge	core_enrichment
KEGG_CELL_CYCLE	KEGG_CELL_CYCLE	124	0.599475	1.57619	0.0123457	1	1	9851	tags=25%, list=17%, signal=21%	ESPL1/CDC25C/TTK/CDC45/BUB1B/E2F2/BUB1/ORC1/CCNB2/CDC6/CDK1/CDC20/PKMYT1/CCNA2/ORC6/PTTG1/CDC25A/E2F1/PLK1/WEE1/CCNB1/CHEK1/CHEK2/MAD2L1/CCNA1/MCM2/DBF4/CDKN2C/CCNE1/CDK2/CDC7
KEGG_REGULATION_OF_AUTOPHAGY	KEGG_REGULATION_OF_AUTOPHAGY	34	0.713597	1.54293	0.0384615	1	1	7370	tags=24%, list=13%, signal=20%	IFNA7/BECN2/IFNA4/IFNA14/INS/IFNA16/IFNG/IFNA1
LIHC
ID	Description	setSize	enrichmentScore	NES	pvalue	p.adjust	qvalues	rank	leading_edge	core_enrichment
KEGG_OLFACTORY_TRANSDUCTION	KEGG_OLFACTORY_TRANSDUCTION	383	0.53334	1.30205	0.00990099	1	1	6150	tags=30%, list=11%, signal=27%	OR2T10/OR6C3/OR1L3/OR2M4/OR6C76/OR2T4/OR5M10/OR6N1/OR2T6/OR7G1/OR8D2/OR4A16/OR8K1/OR10K2/OR6C74/OR10K1/OR13C4/OR5AC2/OR5D18/OR7D4/OR4S1/OR2M5/OR6X1/OR4M2/OR6V1/OR11H1/OR52A1/OR4K17/OR2M7/OR51B2/OR8H2/OR8J1/OR9Q2/OR4P4/OR6C70/OR4A15/OR4N2/OR6C2/OR10C1/OR6K6/OR4K13/OR4F3/OR5D14/OR5M8/OR1D2/OR5AU1/OR4N5/OR7A10/OR10T2/OR5F1/OR5M11/OR4E2/OR52E2/OR2T27/OR1D5/OR4C11/OR51V1/OR4C15/OR10H5/OR51B4/OR5M3/OR6…
LUAD
ID	Description	setSize	enrichmentScore	NES	pvalue	p.adjust	qvalues	rank	leading_edge	core_enrichment
KEGG_COMPLEMENT_AND_COAGULATION_CASCADES	KEGG_COMPLEMENT_AND_COAGULATION_CASCADES	69	-0.591556	-1.53931	0.037037	1	1	14084	tags=59%, list=25%, signal=45%	KLKB1/C2/PROS1/A2M/CFI/F13A1/KNG1/CD55/F3/CR2/MASP2/THBD/CR1/C3/C5/VWF/TFPI/SERPINA1/F8/CFD/PLG/FGA/F10/SERPINF2/C4A/C8A/C4B/C8B/FGG/C4BPA/F2/C7/SERPIND1/MASP1/F13B/C6/MBL2/SERPINC1/CPB2/F11/F9
KEGG_OLFACTORY_TRANSDUCTION	KEGG_OLFACTORY_TRANSDUCTION	383	-0.435854	-1.42161	0.0454545	1	1	4532	tags=28%, list=8%, signal=26%	OR8I2/OR8H3/CNGA4/OR2L13/OR13C8/OR5P2/OR5K1/OR6X1/OR13G1/OR2A25/OR1S2/OR5B17/OR2A5/OR5A1/OR5T3/OR6B1/OR10C1/OR6K3/OR51T1/OR10V1/OR7A17/OR14I1/OR4D1/OR14J1/OR10P1/OR2T12/OR4D11/OR7C2/OR8H1/OR2G6/OR2M2/OR4D9/OR8H2/CLCA1/PRKACG/OR9Q2/OR4A16/OR1N1/OR6N1/OR5AK2/OR4A5/OR4K1/OR2T29/OR9G4/OR5D18/OR4K2/OR4S1/OR8K5/OR10J1/OR4A47/OR2G3/OR8U1/OR4D10/OR4K15/OR51A7/OR1D2/OR2V2/OR2T5/OR2G2/OR5M1/OR6C1/OR6Y1/OR5…
LUSC
ID	Description	setSize	enrichmentScore	NES	pvalue	p.adjust	qvalues	rank	leading_edge	core_enrichment
KEGG_OLFACTORY_TRANSDUCTION	KEGG_OLFACTORY_TRANSDUCTION	383	0.73282	1.4853	0.00990099	0.90099	0.90099	7717	tags=51%, list=14%, signal=44%	OR6Y1/OR8K1/OR4C15/OR2T6/OR7G1/OR2M7/OR8H2/OR8J1/OR4A15/OR4B1/OR5F1/OR4C46/OR2T12/OR5AS1/OR4C13/OR8B4/OR52J3/OR2T27/OR51A2/OR4M1/OR51D1/OR4K15/OR5I1/OR2Y1/OR11L1/OR8U1/OR8H1/OR4D11/OR2F2/OR1S1/OR8H3/OR10R2/OR6K2/OR2T11/OR5D16/OR51F1/OR4M2/OR11H1/OR52A1/OR10Z1/OR2M5/OR51F2/OR4K13/OR4C45/OR5M9/OR2T1/OR4K5/OR8G2P/OR6C6/OR4S1/OR51V1/OR8I2/OR51G1/OR1S2/OR10J1/OR10G9/OR4L1/OR5M10/OR6C74/OR4C3/OR5L1/OR8…
KEGG_REGULATION_OF_AUTOPHAGY	KEGG_REGULATION_OF_AUTOPHAGY	34	0.706237	1.35186	0.0309278	0.90099	0.90099	10167	tags=26%, list=18%, signal=22%	IFNA7/IFNA17/IFNA10/IFNA6/IFNA14/IFNA16/IFNA4/BECN2/IFNA13
OV
ID	Description	setSize	enrichmentScore	NES	pvalue	p.adjust	qvalues	rank	leading_edge	core_enrichment
KEGG_CYTOSOLIC_DNA_SENSING_PATHWAY	KEGG_CYTOSOLIC_DNA_SENSING_PATHWAY	55	0.652512	1.54319	0.0285714	1	1	5386	tags=13%, list=10%, signal=12%	IFNA7/IFNA4/IFNA17/IFNA16/IFNA14/IFNA10/IFNA21
KEGG_REGULATION_OF_AUTOPHAGY	KEGG_REGULATION_OF_AUTOPHAGY	34	0.737655	1.5706	0.031746	1	1	5386	tags=24%, list=10%, signal=21%	IFNA7/IFNA4/IFNA17/IFNA16/IFNA14/INS/IFNA10/IFNA21
KEGG_ANTIGEN_PROCESSING_AND_PRESENTATION	KEGG_ANTIGEN_PROCESSING_AND_PRESENTATION	81	0.553407	1.37405	0.0405405	1	1	5386	tags=9%, list=10%, signal=8%	IFNA7/IFNA4/IFNA17/IFNA16/IFNA14/IFNA10/IFNA21
KEGG_RIG_I_LIKE_RECEPTOR_SIGNALING_PATHWAY	KEGG_RIG_I_LIKE_RECEPTOR_SIGNALING_PATHWAY	71	0.565859	1.40569	0.0405405	1	1	5386	tags=10%, list=10%, signal=9%	IFNA7/IFNA4/IFNA17/IFNA16/IFNA14/IFNA10/IFNA21
KEGG_DRUG_METABOLISM_OTHER_ENZYMES	KEGG_DRUG_METABOLISM_OTHER_ENZYMES	51	0.653576	1.51743	0.0428571	1	1	7306	tags=24%, list=13%, signal=21%	UGT1A5/UGT2A1/UGT1A4/UGT1A3/UGT2B28/UGT2B15/NAT2/UGT1A6/CES5A/UGT1A1/CYP2A13/UGT2B17
KEGG_ASCORBATE_AND_ALDARATE_METABOLISM	KEGG_ASCORBATE_AND_ALDARATE_METABOLISM	25	0.741201	1.47875	0.0447761	1	1	7306	tags=36%, list=13%, signal=31%	UGT1A5/UGT2A1/UGT1A4/UGT1A3/UGT2B28/UGT2B15/UGT1A6/UGT1A1/UGT2B17
KEGG_PENTOSE_AND_GLUCURONATE_INTERCONVERSIONS	KEGG_PENTOSE_AND_GLUCURONATE_INTERCONVERSIONS	28	0.715377	1.48628	0.0454545	1	1	7306	tags=32%, list=13%, signal=28%	UGT1A5/UGT2A1/UGT1A4/UGT1A3/UGT2B28/UGT2B15/UGT1A6/UGT1A1/UGT2B17
PAAD
ID	Description	setSize	enrichmentScore	NES	pvalue	p.adjust	qvalues	rank	leading_edge	core_enrichment
KEGG_VALINE_LEUCINE_AND_ISOLEUCINE_BIOSYNTHESIS	KEGG_VALINE_LEUCINE_AND_ISOLEUCINE_BIOSYNTHESIS	11	0.865945	1.58872	0.0204082	1	1	1844	tags=9%, list=3%, signal=9%	PDHA2
KEGG_CALCIUM_SIGNALING_PATHWAY	KEGG_CALCIUM_SIGNALING_PATHWAY	177	-0.49401	-1.38447	0.0212766	1	1	13849	tags=42%, list=25%, signal=32%	TRPC1/PLCD4/CHRM3/TACR2/PLN/ADCY4/LHCGR/P2RX3/P2RX7/HTR7/PRKCG/PRKCB/ADRB1/ADRB2/ITPR1/P2RX2/AVPR1A/CAMK2A/HRH2/TRHR/ADORA2A/CACNA1H/GNAL/ADRA1D/PDE1B/PDE1A/CYSLTR2/CACNA1C/PDE1C/CYSLTR1/EDNRB/CACNA1D/CACNA1I/PTGER3/ATP2B3/DRD5/ERBB4/SLC8A1/CACNA1G/SLC25A31/PTGFR/ADRA1A/AGTR1/MYLK2/P2RX1/ADCY2/P2RX6/CHRM5/HTR2A/GRIN2C/RYR3/ADRB3/CACNA1S/RYR2/NOS1/GRPR/PRKACG/ADCY1/CACNA1A/CAMK2B/CHRM2/CCKBR/TACR1…
KEGG_NEUROACTIVE_LIGAND_RECEPTOR_INTERACTION	KEGG_NEUROACTIVE_LIGAND_RECEPTOR_INTERACTION	271	-0.513091	-1.48883	0.0243902	1	1	13760	tags=55%, list=24%, signal=42%	F2RL2/CHRM3/GRID1/MCHR1/TACR2/SCTR/CRHR1/S1PR1/LHCGR/P2RY10/P2RX3/HTR1A/GIPR/P2RX7/GCGR/P2RY13/HTR7/CHRNE/ADRB1/GALR3/ADRB2/CALCRL/TRPV1/NPY1R/CGA/P2RX2/GH1/GLRB/AVPR1A/PRSS2/CALCR/LEPR/SSTR1/ADORA1/P2RY1/P2RY8/HRH2/TRHR/ADORA2A/P2RY4/NMBR/HTR1F/MCHR2/ADRA1D/TAAR6/MC4R/CYSLTR2/CHRNA6/CYSLTR1/EDNRB/LPAR3/NPY5R/P2RY14/PRSS1/GRM2/GABRA2/PTGER3/GRM6/KISS1R/CHRM4/GPR83/CHRNA3/CRHR2/TSHR/GABRQ/DRD5/CNR…
KEGG_SYSTEMIC_LUPUS_ERYTHEMATOSUS	KEGG_SYSTEMIC_LUPUS_ERYTHEMATOSUS	135	0.554863	1.45216	0.0344828	1	1	8061	tags=28%, list=14%, signal=24%	H3Y2/H2ACP1/H4C7/H4C6/H2AC19/H2BC14/H2AC18/H3C11/H3C12/H2AC14/H2BW1/H4C14/H2AC17/H2BC17/H2AC11/H3C8/H2BW2/H2AC16/H2AC4/H2BC13/H2BC10/H2AC12/H2AC21/H4C13/H2BU1/H4C15/H4C2/H2BC6/H2BC11/IFNG/H3C13/H2BC7/C9/H2BC18/H4C12/H2BC3/H3C10/H2AC13
PCPG
ID	Description	setSize	enrichmentScore	NES	pvalue	p.adjust	qvalues	rank	leading_edge	core_enrichment
KEGG_CYTOSOLIC_DNA_SENSING_PATHWAY	KEGG_CYTOSOLIC_DNA_SENSING_PATHWAY	55	-0.717937	-1.68052	0.0263158	0.939394	0.939394	3003	tags=13%, list=5%, signal=12%	IFNA14/IFNA1/IFNA17/IFNA4/IFNA16/IFNA13/IFNA2
KEGG_AUTOIMMUNE_THYROID_DISEASE	KEGG_AUTOIMMUNE_THYROID_DISEASE	50	-0.713513	-1.63243	0.027027	0.939394	0.939394	3003	tags=14%, list=5%, signal=13%	IFNA14/IFNA1/IFNA17/IFNA4/IFNA16/IFNA13/IFNA2
KEGG_ANTIGEN_PROCESSING_AND_PRESENTATION	KEGG_ANTIGEN_PROCESSING_AND_PRESENTATION	81	-0.613977	-1.49214	0.0294118	0.939394	0.939394	4496	tags=12%, list=8%, signal=11%	KLRC3/KLRC1/KIR3DL2/IFNA14/IFNA1/IFNA17/IFNA4/IFNA16/IFNA13/IFNA2
KEGG_REGULATION_OF_AUTOPHAGY	KEGG_REGULATION_OF_AUTOPHAGY	34	-0.814353	-1.80332	0.03125	0.939394	0.939394	3003	tags=21%, list=5%, signal=20%	IFNA14/IFNA1/IFNA17/IFNA4/IFNA16/IFNA13/IFNA2
KEGG_TOLL_LIKE_RECEPTOR_SIGNALING_PATHWAY	KEGG_TOLL_LIKE_RECEPTOR_SIGNALING_PATHWAY	101	-0.590796	-1.48874	0.03125	0.939394	0.939394	3003	tags=7%, list=5%, signal=7%	IFNA14/IFNA1/IFNA17/IFNA4/IFNA16/IFNA13/IFNA2
KEGG_RIG_I_LIKE_RECEPTOR_SIGNALING_PATHWAY	KEGG_RIG_I_LIKE_RECEPTOR_SIGNALING_PATHWAY	71	-0.710443	-1.67665	0.0333333	0.939394	0.939394	3003	tags=11%, list=5%, signal=11%	IFNA14/IFNA1/IFNA17/IFNA4/IFNA16/IFNE/IFNA13/IFNA2
KEGG_NATURAL_KILLER_CELL_MEDIATED_CYTOTOXICITY	KEGG_NATURAL_KILLER_CELL_MEDIATED_CYTOTOXICITY	132	-0.542577	-1.41478	0.0357143	0.939394	0.939394	4496	tags=8%, list=8%, signal=8%	KLRC3/KLRC1/KIR3DL2/IFNA14/NCR2/IFNA1/IFNA17/IFNA4/IFNA16/IFNA13/IFNA2
KEGG_PENTOSE_AND_GLUCURONATE_INTERCONVERSIONS	KEGG_PENTOSE_AND_GLUCURONATE_INTERCONVERSIONS	28	0.7497	1.3943	0.0428571	0.939394	0.939394	5876	tags=32%, list=10%, signal=29%	UGT1A3/UGT1A5/UGT1A10/UGT1A6/UGT2B11/UGT1A9/UGT2B15/UGT2B28/UGT1A7
PRAD
ID	Description	setSize	enrichmentScore	NES	pvalue	p.adjust	qvalues	rank	leading_edge	core_enrichment
KEGG_STARCH_AND_SUCROSE_METABOLISM	KEGG_STARCH_AND_SUCROSE_METABOLISM	52	0.636804	1.68522	0.03125	0.496	0.48	7160	tags=31%, list=13%, signal=27%	UGT2B10/UGT2A3/UGT1A1/UGT1A8/UGT2B15/UGT1A10/UGT2B17/UGT2A1/UGT1A7/UGT2B11/G6PC/UGT1A9/UGT2B7/GYS2/AMY2A/UGT1A6
KEGG_COMPLEMENT_AND_COAGULATION_CASCADES	KEGG_COMPLEMENT_AND_COAGULATION_CASCADES	69	0.560073	1.49907	0.0322581	0.496	0.48	5794	tags=19%, list=10%, signal=17%	F13B/CR2/C8A/FGA/FGB/C8B/C6/FGG/SERPINC1/F9/C9/KNG1/F2
KEGG_DRUG_METABOLISM_OTHER_ENZYMES	KEGG_DRUG_METABOLISM_OTHER_ENZYMES	51	0.652635	1.68695	0.0322581	0.496	0.48	5285	tags=27%, list=9%, signal=25%	UGT2B10/UGT2A3/UGT1A1/UGT1A8/UGT2B15/UGT1A10/UGT2B17/CES5A/UGT2A1/UGT1A7/UGT2B11/CYP3A4/UGT1A9/UGT2B7
KEGG_METABOLISM_OF_XENOBIOTICS_BY_CYTOCHROME_P450	KEGG_METABOLISM_OF_XENOBIOTICS_BY_CYTOCHROME_P450	69	0.58601	1.56849	0.0322581	0.496	0.48	5823	tags=28%, list=10%, signal=25%	UGT2B10/UGT2A3/UGT1A1/UGT1A8/UGT2B15/UGT1A10/UGT2B17/AKR1C4/UGT2A1/UGT1A7/UGT2B11/CYP2B6/CYP3A4/UGT1A9/UGT2B7/GSTA3/AKR1C1/CYP2C9/AKR1C3
KEGG_STEROID_HORMONE_BIOSYNTHESIS	KEGG_STEROID_HORMONE_BIOSYNTHESIS	55	0.62952	1.69079	0.0333333	0.496	0.48	5823	tags=33%, list=10%, signal=29%	UGT2B10/UGT2A3/UGT1A1/UGT1A8/UGT2B15/UGT1A10/UGT2B17/AKR1C4/UGT2A1/AKR1D1/UGT1A7/UGT2B11/CYP3A4/SULT1E1/UGT1A9/UGT2B7/AKR1C1/AKR1C3
KEGG_ASCORBATE_AND_ALDARATE_METABOLISM	KEGG_ASCORBATE_AND_ALDARATE_METABOLISM	25	0.753111	1.55619	0.0344828	0.496	0.48	5285	tags=48%, list=9%, signal=44%	UGT2B10/UGT2A3/UGT1A1/UGT1A8/UGT2B15/UGT1A10/UGT2B17/UGT2A1/UGT1A7/UGT2B11/UGT1A9/UGT2B7
KEGG_RETINOL_METABOLISM	KEGG_RETINOL_METABOLISM	64	0.557517	1.46438	0.0344828	0.496	0.48	5565	tags=25%, list=10%, signal=23%	UGT2B10/UGT2A3/UGT1A1/UGT1A8/UGT2B15/UGT1A10/UGT2B17/CYP26A1/UGT2A1/UGT1A7/UGT2B11/CYP2B6/CYP3A4/UGT1A9/UGT2B7/CYP2C9
KEGG_INTESTINAL_IMMUNE_NETWORK_FOR_IGA_PRODUCTION	KEGG_INTESTINAL_IMMUNE_NETWORK_FOR_IGA_PRODUCTION	46	0.57694	1.45431	0.0357143	0.496	0.48	17606	tags=65%, list=31%, signal=45%	AICDA/TNFRSF13B/TNFRSF17/TNFRSF13C/CD80/CCL27/ICOS/ITGB7/HLA-DOB/IL2/CCL25/TNFSF13B/CD40LG/ITGA4/CD86/CD28/HLA-DQA2/IL15/ICOSLG/MADCAM1/HLA-DQA1/CCL28/HLA-DQB1/HLA-DMA/IL4/PIGR/CXCR4/TGFB1/IL15RA/HLA-DOA
KEGG_PENTOSE_AND_GLUCURONATE_INTERCONVERSIONS	KEGG_PENTOSE_AND_GLUCURONATE_INTERCONVERSIONS	28	0.76429	1.66838	0.0357143	0.496	0.48	5285	tags=43%, list=9%, signal=39%	UGT2B10/UGT2A3/UGT1A1/UGT1A8/UGT2B15/UGT1A10/UGT2B17/UGT2A1/UGT1A7/UGT2B11/UGT1A9/UGT2B7
KEGG_PORPHYRIN_AND_CHLOROPHYLL_METABOLISM	KEGG_PORPHYRIN_AND_CHLOROPHYLL_METABOLISM	41	0.729573	1.79031	0.0357143	0.496	0.48	5285	tags=32%, list=9%, signal=29%	UGT2B10/UGT2A3/UGT1A1/UGT1A8/UGT2B15/UGT1A10/UGT2B17/FTMT/UGT2A1/UGT1A7/UGT2B11/UGT1A9/UGT2B7
KEGG_OOCYTE_MEIOSIS	KEGG_OOCYTE_MEIOSIS	112	0.443364	1.26289	0.037037	0.496	0.48	8311	tags=17%, list=15%, signal=14%	CALML5/SGO1/ESPL1/CDC25C/BUB1/PKMYT1/PLK1/FBXO43/CDC20/CDK1/PTTG1/CCNE2/AURKA/CCNB2/SPDYC/MAD2L1/SMC1B/PPP3R2/CCNE1
KEGG_CELL_ADHESION_MOLECULES_CAMS	KEGG_CELL_ADHESION_MOLECULES_CAMS	131	0.450488	1.3125	0.0384615	0.496	0.48	17809	tags=44%, list=32%, signal=30%	CLDN17/CLDN9/CD80/ICOS/CD6/ITGB7/CTLA4/SIGLEC1/HLA-DOB/PDCD1/VCAN/CNTN2/ICAM3/CD40LG/CADM3/SELL/CD226/ITGA4/CDH2/CD8B/CLDN6/CLDN16/CLDN18/ITGAL/CLDN10/CD22/NRXN2/CD2/SPN/CD86/NLGN1/CD28/OCLN/HLA-DQA2/VCAM1/CLDN15/SELPLG/PTPRC/ICOSLG/CD4/ITGAM/MADCAM1/CD8A/HLA-DQA1/ITGB2/SDC1/PDCD1LG2/NRXN3/HLA-DQB1/HLA-DMA/NLGN4X/CD276/NRCAM/ICAM2/CNTNAP1/NCAM2/HLA-DOA/SDC4
KEGG_SPLICEOSOME	KEGG_SPLICEOSOME	127	0.445879	1.31314	0.0384615	0.496	0.48	26021	tags=83%, list=46%, signal=45%	HSPA6/ISY1/SNRPF/THOC3/SNRPB2/SNRPD1/LSM5/LSM8/LSM2/MAGOHB/THOC1/CCDC12/PRPF3/SNRPE/SNRPA1/LSM6/PPIH/SNRPG/MAGOH/ALYREF/LSM3/LSM7/HNRNPA1L2/LSM4/PPIE/SF3A2/SNRNP40/BUD31/EFTUD2/RBM17/SYF2/SNRPD2/SF3B6/PRPF38A/SNRPC/PRPF31/CWC15/SNRPB/USP39/SNRPA/PUF60/HSPA1L/SRSF2/RBMX/PHF5A/NCBP2/CTNNBL1/TCERG1/SNRPD3/SART1/HNRNPA1/DDX39B/U2SURP/EIF4A3/SF3A3/SNW1/SRSF10/SF3B2/HNRNPC/PQBP1/U2AF2/RBM22/SMNDC1/NCBP…
KEGG_CELL_CYCLE	KEGG_CELL_CYCLE	124	0.586218	1.69136	0.04	0.496	0.48	13063	tags=31%, list=23%, signal=24%	E2F2/ESPL1/CDC25C/BUB1/CDC45/ORC6/PKMYT1/PLK1/CDC20/ORC1/CDK1/CCNA2/PTTG1/BUB1B/CCNE2/TTK/CDC6/E2F1/CDKN2A/CCNB2/MAD2L1/SMC1B/CCNE1/CDC7/CCNB1/MCM4/CDKN2B/SKP2/RBL1/CHEK2/CHEK1/CDKN2C/MCM6/CDKN2D/MCM2/CCNA1/CDC25B/E2F5/E2F3
KEGG_PRIMARY_IMMUNODEFICIENCY	KEGG_PRIMARY_IMMUNODEFICIENCY	35	0.689535	1.55667	0.04	0.496	0.48	14503	tags=63%, list=26%, signal=47%	AICDA/IGLL1/CD19/TNFRSF13B/TNFRSF13C/AIRE/CD79A/ICOS/ZAP70/CD40LG/JAK3/CD8B/BTK/ADA/CD3D/IL2RG/LCK/CD3E/PTPRC/CD4/CIITA/CD8A
READ
ID	Description	setSize	enrichmentScore	NES	pvalue	p.adjust	qvalues	rank	leading_edge	core_enrichment
KEGG_OLFACTORY_TRANSDUCTION	KEGG_OLFACTORY_TRANSDUCTION	383	0.535908	1.41753	0.0133333	0.369048	0.344612	5441	tags=27%, list=10%, signal=24%	OR5P3/OR4F6/OR51S1/OR52J3/OR6C75/OR2M5/OR10P1/OR1D5/OR2M4/OR7G3/OR8J3/OR51D1/OR14J1/OR4D11/OR1S2/OR6K6/OR7A10/OR7C2/OR7G1/OR4C45/OR4D9/OR5L2/OR52A1/OR9G4/OR6C65/OR4N5/OR2S2/OR5AN1/OR2L2/OR2L3/OR5D18/OR2G3/OR4K13/OR1E2/OR6Y1/OR4A15/OR4C11/OR5T1/OR4K5/OR4A5/OR1B1/OR4M1/OR51B2/OR8H1/OR6C76/OR9I1/OR8J1/OR4C12/OR8G1/OR4B1/OR12D2/OR5M9/OR10A7/OR6V1/OR1G1/OR5D16/OR12D3/OR52E8/OR52L1/OR56A3/OR1A2/OR52N1/…
KEGG_FATTY_ACID_METABOLISM	KEGG_FATTY_ACID_METABOLISM	42	-0.710063	-1.50328	0.0208333	0.369048	0.344612	5708	tags=12%, list=10%, signal=11%	ADH1B/ACADL/ADH1A/CYP4A11/CYP4A22
KEGG_STARCH_AND_SUCROSE_METABOLISM	KEGG_STARCH_AND_SUCROSE_METABOLISM	52	-0.718478	-1.5691	0.0217391	0.369048	0.344612	9670	tags=37%, list=17%, signal=30%	HK3/AMY1A/TREH/UGT2B15/G6PC2/PYGM/UGT2B7/UGT1A1/MGAM/GBA3/UGT2B11/UGT1A9/UGT2B4/UGT1A3/AMY2A/GYS2/G6PC/UGT2B28/UGT1A4
KEGG_DRUG_METABOLISM_OTHER_ENZYMES	KEGG_DRUG_METABOLISM_OTHER_ENZYMES	51	-0.725418	-1.5598	0.0222222	0.369048	0.344612	5281	tags=25%, list=9%, signal=23%	CYP3A7/UGT2B11/UPP2/UGT1A9/CYP3A4/UGT2B4/CYP2A7/UGT1A3/UPB1/DPYS/CYP2A6/UGT2B28/UGT1A4
KEGG_STEROID_HORMONE_BIOSYNTHESIS	KEGG_STEROID_HORMONE_BIOSYNTHESIS	55	-0.723009	-1.5637	0.0222222	0.369048	0.344612	10764	tags=53%, list=19%, signal=43%	UGT2A3/CYP19A1/AKR1C1/HSD17B2/HSD3B1/AKR1C4/UGT2B15/UGT2B7/HSD11B1/CYP7B1/UGT1A1/CYP1B1/HSD17B3/CYP3A7/CYP21A2/UGT2B11/CYP17A1/UGT1A9/SULT1E1/CYP3A4/UGT2B4/UGT1A3/SRD5A2/CYP11B2/CYP7A1/UGT2B28/AKR1D1/CYP11B1/UGT1A4
KEGG_COMPLEMENT_AND_COAGULATION_CASCADES	KEGG_COMPLEMENT_AND_COAGULATION_CASCADES	69	-0.731603	-1.67848	0.0232558	0.369048	0.344612	9623	tags=41%, list=17%, signal=34%	F7/PROC/F13A1/C4A/F10/SERPINA5/KLKB1/MASP1/C4B/F11/CR1/C6/C7/KNG1/MASP2/SERPIND1/FGA/SERPINC1/FGB/CPB2/C9/FGG/PLG/F13B/C8B/MBL2/C8A/F9
KEGG_PPAR_SIGNALING_PATHWAY	KEGG_PPAR_SIGNALING_PATHWAY	69	-0.626503	-1.43735	0.0232558	0.369048	0.344612	5758	tags=13%, list=10%, signal=12%	APOA1/ACADL/APOA2/APOC3/APOA5/CYP7A1/CYP8B1/CYP4A11/CYP4A22
KEGG_ECM_RECEPTOR_INTERACTION	KEGG_ECM_RECEPTOR_INTERACTION	84	-0.619854	-1.5005	0.0238095	0.369048	0.344612	19150	tags=79%, list=34%, signal=52%	COL1A2/COL1A1/ITGB1/LAMC1/ITGB5/COL4A1/SV2C/ITGAV/COL11A1/FN1/COL3A1/LAMB4/ITGB6/COL4A2/COL5A1/COL6A2/AGRN/COL5A2/COL6A1/ITGA2B/SDC3/ITGB8/COL5A3/THBS1/COL6A3/THBS3/LAMA4/GP5/VWF/ITGA7/ITGA5/LAMA3/LAMA5/LAMB2/SDC2/THBS2/ITGA11/ITGA9/COL4A6/HSPG2/COL11A2/SV2A/SPP1/TNC/COL6A6/GP1BA/ITGB3/ITGB7/ITGA4/LAMA2/IBSP/COMP/GP9/CD36/ITGA10/LAMC3/LAMA1/CHAD/TNXB/COL2A1/THBS4/TNN/SV2B/TNR/RELN/VTN
KEGG_PEROXISOME	KEGG_PEROXISOME	78	-0.625462	-1.46555	0.0238095	0.369048	0.344612	2977	tags=5%, list=5%, signal=5%	BAAT/DAO/HAO2/HAO1
KEGG_RETINOL_METABOLISM	KEGG_RETINOL_METABOLISM	64	-0.733324	-1.64561	0.0238095	0.369048	0.344612	7432	tags=44%, list=13%, signal=38%	ADH1C/CYP26B1/UGT2B15/UGT2B7/RDH16/UGT1A1/LRAT/CYP2C19/ADH1B/CYP3A7/RPE65/CYP2C9/UGT2B11/CYP26A1/UGT1A9/CYP2C8/CYP3A4/UGT2B4/CYP2A7/UGT1A3/AWAT2/ADH1A/CYP2A6/UGT2B28/CYP4A11/CYP4A22/CYP1A2/UGT1A4
KEGG_LEUKOCYTE_TRANSENDOTHELIAL_MIGRATION	KEGG_LEUKOCYTE_TRANSENDOTHELIAL_MIGRATION	116	-0.532172	-1.31424	0.0263158	0.369048	0.344612	16565	tags=38%, list=29%, signal=27%	RAPGEF3/MYL9/SIPA1/PECAM1/THY1/ESAM/RASSF5/MMP9/MYL10/CDH5/CLDN14/CLDN2/PRKCG/CYBB/JAM3/ICAM1/VCAM1/CXCR4/NOX3/CLDN5/ITGAL/MAPK11/NCF2/TXK/ITGB2/ITGA4/ITK/PIK3CD/RHOH/CXCL12/NCF1/PIK3CG/PRKCB/PIK3R5/JAM2/MAPK12/ITGAM/CLDN11/PLCG2/CLDN8/CLDN18/CTNNA3/MYL2/CLDN17
KEGG_CELL_ADHESION_MOLECULES_CAMS	KEGG_CELL_ADHESION_MOLECULES_CAMS	131	-0.616816	-1.5351	0.027027	0.369048	0.344612	15483	tags=61%, list=27%, signal=44%	CLDN23/CD2/SDC3/HLA-DOB/ITGB8/MADCAM1/CD40/CD40LG/PECAM1/ESAM/HLA-DQA2/CD274/CD34/SELPLG/NFASC/HLA-DPB1/VCAN/HLA-DPA1/SDC2/CDH5/CLDN14/HLA-DMB/CLDN2/JAM3/CD4/ICAM1/ITGA9/VCAM1/ICOS/CD8B/SPN/SELL/ICAM2/HLA-DQA1/NLGN3/CLDN5/PDCD1/PTPRC/ITGAL/NLGN2/PTPRM/CD8A/ITGB2/CD86/ITGB7/ICAM3/CDH4/NEGR1/ITGA4/HLA-DOA/CNTNAP1/SELP/PDCD1LG2/CTLA4/SELE/CD80/NCAM1/JAM2/CD226/ICOSLG/NCAM2/ITGAM/CDH15/SIGLEC1/CLDN11…
KEGG_VASCULAR_SMOOTH_MUSCLE_CONTRACTION	KEGG_VASCULAR_SMOOTH_MUSCLE_CONTRACTION	114	-0.51797	-1.27269	0.0277778	0.369048	0.344612	16812	tags=49%, list=30%, signal=35%	ADCY7/PLCB2/PRKCE/MYL9/PPP1R12B/NPR2/RAMP3/PPP1R14A/CALD1/ADCY4/PLA2G12B/ACTA2/PRKCQ/PLA2G4B/ACTG2/JMJD7-PLA2G4B/CALML5/ITPR2/PRKCG/PLA2G2A/PRKCH/CALCRL/GUCY1B1/EDNRA/MYLK/CACNA1C/GUCY1A2/GUCY1A1/RAMP1/NPR1/ITPR1/MYH11/ADRA1B/PLA2G2D/PLA2G4A/ADCY1/PRKCB/AVPR1A/KCNMA1/KCNMB4/PTGIR/ADCY2/ADCY5/PLA2G2F/ADRA1D/PLA2G1B/KCNMB1/PLA2G5/AGTR1/ADORA2A/AVPR1B/PLA2G2C/PLA2G2E/ADRA1A/CYP4A11/CYP4A22
KEGG_CALCIUM_SIGNALING_PATHWAY	KEGG_CALCIUM_SIGNALING_PATHWAY	177	-0.499361	-1.30751	0.030303	0.369048	0.344612	14867	tags=41%, list=26%, signal=30%	TNNC1/CAMK4/BDKRB2/CALML5/ITPR2/PRKCG/CACNA1H/BST1/GNAL/TRPC1/EDNRB/HTR6/SLC8A2/TACR2/SPHK1/TBXA2R/EDNRA/SLC8A1/BDKRB1/ATP2B3/MYLK/CACNA1C/PTAFR/PDE1B/ITPR1/ADRA1B/PTGER3/CACNA1G/CHRM5/ADCY1/PRKCB/NOS1/PDE1C/AVPR1A/CACNA1I/CYSLTR1/PLN/ADCY2/P2RX1/CCKBR/CYSLTR2/ADRA1D/PTGFR/PLCG2/CAMK2B/P2RX7/PDE1A/SLC8A3/ADRB2/HRH2/HTR2A/DRD5/GRPR/CAMK2A/GRIN2C/TACR1/HTR7/AGTR1/P2RX6/HTR2C/ADRB3/GRIN2A/ADORA2A/AV…
KEGG_FOCAL_ADHESION	KEGG_FOCAL_ADHESION	199	-0.528215	-1.411	0.0322581	0.369048	0.344612	18025	tags=46%, list=32%, signal=31%	PIP5K1C/FN1/ACTN2/COL3A1/LAMB4/ITGB6/COL4A2/DOCK1/COL5A1/COL6A2/PIK3R1/COL5A2/COL6A1/ITGA2B/CAV1/SHC3/ITGB8/COL5A3/THBS1/COL6A3/FLNA/MYL9/THBS3/PDGFA/LAMA4/BCL2/VWF/PDGFRB/ERBB2/ITGA7/ITGA5/PDGFRA/LAMA3/KDR/LAMA5/LAMB2/AKT3/FLNC/MYL10/PDGFC/SHC2/PDGFB/CAV2/ILK/PRKCG/THBS2/ITGA11/ITGA9/COL4A6/COL11A2/SPP1/FYN/PDGFD/TNC/MAPK10/COL6A6/PGF/ITGB3/MYLK/ITGB7/VEGFC/ITGA4/FLT4/HGF/PIK3CD/PARVG/PIK3CG/PRK…
KEGG_CHEMOKINE_SIGNALING_PATHWAY	KEGG_CHEMOKINE_SIGNALING_PATHWAY	188	-0.535889	-1.40214	0.0333333	0.369048	0.344612	17019	tags=46%, list=30%, signal=32%	SHC3/CXCL10/PREX1/CCL24/ADCY7/PLCB2/STAT2/PRKCZ/CXCL9/GRK3/CCL25/ADCY4/GRK5/CXCL8/AKT3/XCL1/ELMO1/CXCR6/SHC2/CCL5/GNB5/CCL22/JAK3/CCL17/CCL1/GNG11/CCL18/CCL19/PF4V1/CXCL5/CCL4/CCL11/CX3CL1/CXCR4/GNB4/WAS/CCR10/CCL26/CCR1/GNG2/GNGT2/HCK/CCR5/CCL7/CCL2/CCL21/CCR7/TIAM1/CCL4L2/CCL3/ITK/PIK3CD/CXCL12/CCR4/CXCL6/FGR/ADCY1/NCF1/PIK3CG/CCL8/PRKCB/GNG7/RASGRP2/PIK3R5/DOCK2/ADCY2/ADCY5/XCR1/CCL3L3/CCL13/S…
KEGG_MAPK_SIGNALING_PATHWAY	KEGG_MAPK_SIGNALING_PATHWAY	267	-0.450757	-1.23686	0.0344828	0.369048	0.344612	16328	tags=34%, list=29%, signal=24%	CACNG6/PDGFA/RPS6KA2/MAPK8IP1/FGF17/MAP3K8/GADD45A/CACNG4/PDGFRB/PDGFRA/PLA2G12B/GADD45B/PLA2G4B/AKT3/MAPT/FLNC/JMJD7-PLA2G4B/PDGFB/CACNA2D2/TGFB1/MAP4K1/CD14/PRKCG/DUSP5/PLA2G2A/CACNA1H/MAP3K12/CACNG1/CACNG5/RASGRP1/MRAS/MAPK10/CACNG3/IL1R2/IL1R1/MAPK11/FGF18/RASGRP3/RASGRF2/CACNA1C/CACNA2D1/HSPA2/FGFR1/CACNB4/FGFR2/MEF2C/CACNG7/NTF3/BDNF/PLA2G2D/PLA2G4A/CACNA1G/TNF/PRKCB/FGF2/PTPRR/RASGRP2/CACN…
KEGG_NEUROACTIVE_LIGAND_RECEPTOR_INTERACTION	KEGG_NEUROACTIVE_LIGAND_RECEPTOR_INTERACTION	271	-0.473182	-1.30032	0.0357143	0.369048	0.344612	13086	tags=50%, list=23%, signal=39%	HTR6/GABRR2/PRL/THRB/GRIK1/VIPR2/TACR2/CALCRL/TBXA2R/PTGER2/NPFFR2/C5AR1/ADORA1/EDNRA/P2RY8/S1PR5/GABRA5/BDKRB1/FPR3/PTAFR/FPR2/C3AR1/NR3C1/S1PR3/P2RY14/P2RY6/ADRA1B/GRIK3/RXFP1/PTGER3/SSTR2/CHRM5/F2/GRM6/P2RY10/UTS2R/NMUR1/GRM7/AVPR1A/GABRA6/CHRM4/HCRTR1/HRH3/CYSLTR1/PTGIR/FPR1/GHR/HTR1B/DRD2/NPY1R/P2RX1/CCKBR/CYSLTR2/GLRB/HRH4/ADRA1D/GABBR2/GRID2/CNR2/MC5R/PTGFR/GLP2R/GRIK2/P2RY13/OPRL1/MC3R/P2…
KEGG_PATHWAYS_IN_CANCER	KEGG_PATHWAYS_IN_CANCER	325	-0.419173	-1.14214	0.0434783	0.402597	0.37594	16095	tags=32%, list=28%, signal=23%	FGF17/LAMA4/BCL2/RUNX1/PDGFRB/RASSF5/FZD2/ERBB2/PDGFRA/ETS1/SUFU/CXCL8/FZD4/LAMA3/MMP9/LAMA5/LAMB2/AKT3/RXRG/FLT3LG/PDGFB/TRAF1/TGFB1/CASP9/WNT4/WNT5B/SMO/PRKCG/COL4A6/TGFA/BMP4/TCF7L1/SPI1/MAPK10/PGF/FGF18/DCC/CDKN2A/VEGFC/MITF/KIT/CSF1R/RARB/CSF2RA/FGFR1/WNT10A/GLI1/FGFR2/WNT1/WNT2B/HGF/PTCH2/PIK3CD/WNT9B/WNT16/CDKN2B/IL6/PIK3CG/FLT3/PRKCB/FGF2/LEF1/PIK3R5/CSF3R/WNT10B/WNT9A/FGF13/GLI2/TGFB2/FA…
KEGG_DRUG_METABOLISM_CYTOCHROME_P450	KEGG_DRUG_METABOLISM_CYTOCHROME_P450	71	-0.608882	-1.42022	0.0454545	0.402597	0.37594	8050	tags=35%, list=14%, signal=30%	FMO3/UGT2B7/GSTA2/GSTM5/UGT1A1/MAOB/AOX1/CYP2C19/ADH1B/CYP3A7/CYP2C9/UGT2B11/FMO2/UGT1A9/CYP2E1/CYP2C8/CYP3A4/UGT2B4/CYP2A7/UGT1A3/ADH1A/CYP2A6/UGT2B28/CYP1A2/UGT1A4
KEGG_GLYOXYLATE_AND_DICARBOXYLATE_METABOLISM	KEGG_GLYOXYLATE_AND_DICARBOXYLATE_METABOLISM	16	-0.841259	-1.4513	0.0454545	0.402597	0.37594	2118	tags=19%, list=4%, signal=18%	AFMID/HAO2/HAO1
SKCM
ID	Description	setSize	enrichmentScore	NES	pvalue	p.adjust	qvalues	rank	leading_edge	core_enrichment
KEGG_REGULATION_OF_AUTOPHAGY	KEGG_REGULATION_OF_AUTOPHAGY	34	-0.696761	-1.58742	0.0192308	1	1	2200	tags=24%, list=4%, signal=23%	IFNA1/IFNA17/IFNA7/IFNA16/IFNA4/IFNA14/IFNA6/INS
KEGG_RIG_I_LIKE_RECEPTOR_SIGNALING_PATHWAY	KEGG_RIG_I_LIKE_RECEPTOR_SIGNALING_PATHWAY	71	-0.569739	-1.54534	0.0208333	1	1	2200	tags=10%, list=4%, signal=9%	IFNA1/IFNA17/IFNA7/IFNA16/IFNA4/IFNA14/IFNA6
KEGG_STARCH_AND_SUCROSE_METABOLISM	KEGG_STARCH_AND_SUCROSE_METABOLISM	52	-0.592684	-1.53634	0.0434783	1	1	5210	tags=27%, list=9%, signal=24%	UGT1A1/MGAM/UGT1A10/UGT1A6/G6PC2/UGT1A4/UGT2B10/SI/G6PC/UGT1A7/UGT1A3/AMY1A/AMY1B/AMY1C
KEGG_ARACHIDONIC_ACID_METABOLISM	KEGG_ARACHIDONIC_ACID_METABOLISM	58	-0.572569	-1.45696	0.0444444	1	1	6228	tags=29%, list=11%, signal=26%	AKR1C3/CYP2C9/CYP2C19/GPX2/PLA2G5/CYP4A11/CYP4F3/CYP4A22/CYP2B6/PLA2G2E/CYP4F2/CYP2C18/PLA2G3/ALOX12B/PLA2G4E/GGT6/PLA2G2F
KEGG_CYTOSOLIC_DNA_SENSING_PATHWAY	KEGG_CYTOSOLIC_DNA_SENSING_PATHWAY	55	-0.56273	-1.43273	0.0454545	1	1	2200	tags=13%, list=4%, signal=12%	IFNA1/IFNA17/IFNA7/IFNA16/IFNA4/IFNA14/IFNA6
STAD
ID	Description	setSize	enrichmentScore	NES	pvalue	p.adjust	qvalues	rank	leading_edge	core_enrichment
KEGG_OLFACTORY_TRANSDUCTION	KEGG_OLFACTORY_TRANSDUCTION	383	0.566242	2.04368	0.0128205	0.442857	0.428571	9521	tags=46%, list=17%, signal=38%	OR4N4/OR2T29/OR8K5/OR2T27/OR14A16/OR5T2/OR6C70/OR51B4/OR5AU1/OR5T1/OR5T3/OR4A47/OR4M2/OR4F4/OR51B5/OR2T4/OR5L1/OR10A6/OR8H3/OR5D18/OR4S1/OR10H4/OR2F1/OR52E8/OR10S1/OR56A3/OR6K6/OR4E2/OR10G8/OR2M5/OR8G5/OR52E6/OR4F6/OR14I1/OR51I1/OR5M1/OR9Q2/OR8I2/OR5AK2/OR8A1/OR8D1/OR4L1/OR5AS1/OR8D2/OR12D2/OR13C8/OR51A4/OR2B6/OR1C1/OR1D5/OR8H1/OR4A15/OR10H2/OR1F1/OR10A7/OR7D4/OR5D14/OR2C3/OR2M3/OR51T1/OR8G2P/OR5…
KEGG_SYSTEMIC_LUPUS_ERYTHEMATOSUS	KEGG_SYSTEMIC_LUPUS_ERYTHEMATOSUS	135	0.508978	1.63776	0.0147059	0.442857	0.428571	9604	tags=39%, list=17%, signal=33%	H3Y1/H2ACP1/H3Y2/H2AB1/H2AC16/H2AC4/C8A/H2AB3/H3C11/H2AC14/IFNG/H2AC12/H2BC17/H4C13/H2AC17/H2BC13/H2BU1/C8B/H4C1/H3C12/H4C2/H2AC21/H2BC14/H3C7/H3C13/H2BC10/H3C8/H2BW1/H2AC11/H4C4/H2BC15/H2BC7/H2BC11/ACTN3/H2AC13/H3C15/H3C1/H2BC6/H2BC3/H4C15/H2BC18/H2AC1/H2AC20/H3C10/H4C12/H3C4/H2AC18/H4C3/H2AC7/H4C14/H2AC19/H2BC9/H2AC8
KEGG_VASCULAR_SMOOTH_MUSCLE_CONTRACTION	KEGG_VASCULAR_SMOOTH_MUSCLE_CONTRACTION	114	-0.440679	-1.51145	0.025641	0.442857	0.428571	13356	tags=35%, list=24%, signal=27%	PLA2G12B/RAMP1/AVPR1B/ADORA2B/KCNMB4/CALML5/CALCRL/ACTA2/MYL9/CALD1/PRKACB/ITPR2/GUCY1B1/CYP4A22/ADCY4/PTGIR/NPR2/PPP1R14A/PRKCB/EDNRA/GUCY1A2/GUCY1A1/ACTG2/NPR1/ITPR1/MYLK/PPP1R12B/PLA2G5/MYH11/PRKG1/AVPR1A/ADCY5/ADRA1D/KCNMB1/CACNA1C/ADRA1A/KCNMA1/ADCY2/PLA2G2C/AGTR1
KEGG_DILATED_CARDIOMYOPATHY	KEGG_DILATED_CARDIOMYOPATHY	90	-0.48773	-1.63913	0.0263158	0.442857	0.428571	6573	tags=31%, list=12%, signal=28%	CACNB4/SGCG/CACNG1/TGFB2/TGFB3/SLC8A1/ITGA9/DES/CACNG2/ITGA7/RYR2/ITGA8/ITGA10/ITGB3/CACNA2D1/LAMA2/ACTC1/ADCY5/SGCD/PLN/DMD/CACNA1C/CACNA2D3/CACNB2/SGCA/ADCY2/CACNG3/IGF1
KEGG_NEUROTROPHIN_SIGNALING_PATHWAY	KEGG_NEUROTROPHIN_SIGNALING_PATHWAY	125	-0.395066	-1.39155	0.0277778	0.442857	0.428571	6275	tags=23%, list=11%, signal=21%	CAMK2G/IRS1/PIK3R1/PIK3CG/BEX3/MAPK11/MAP3K3/GAB1/CALML5/NTF4/RPS6KA5/IRS2/RPS6KA2/CAMK4/NTRK1/BCL2/SHC2/AKT3/NTF3/NGF/NTRK2/SHC3/IRS4/NGFR/SHC4/CAMK2A/MAPK10/NTRK3/RPS6KA6
KEGG_AXON_GUIDANCE	KEGG_AXON_GUIDANCE	129	-0.491155	-1.75531	0.0285714	0.442857	0.428571	10371	tags=27%, list=18%, signal=22%	SEMA6A/EPHB1/NTN4/ABLIM2/SEMA3C/EPHA4/SEMA6C/ROBO1/SEMA3G/EPHB6/SEMA3D/NTN3/ROBO2/CXCL12/SEMA6D/NTN1/EFNA5/CFL2/PAK3/GNAI1/NFATC4/UNC5C/SEMA3A/ABLIM3/SLIT3/SEMA3E/PLXNB3/L1CAM/EPHA3/SLIT2/LRRC4C/EPHA5/NTNG1/EPHA7/EPHA6
KEGG_CELL_ADHESION_MOLECULES_CAMS	KEGG_CELL_ADHESION_MOLECULES_CAMS	131	-0.438028	-1.56437	0.0285714	0.442857	0.428571	8352	tags=21%, list=15%, signal=18%	SELE/MPZ/CLDN5/NLGN4X/PTPRM/JAM3/CLDN11/ITGA9/CNTNAP1/ITGA8/MADCAM1/CD22/NLGN3/SELP/JAM2/NCAM2/CLDN10/NFASC/L1CAM/NCAM1/NRXN2/NLGN1/NRXN3/CNTN1/NEGR1/CNTN2/CADM3/NRXN1
KEGG_ECM_RECEPTOR_INTERACTION	KEGG_ECM_RECEPTOR_INTERACTION	84	-0.508023	-1.63694	0.0285714	0.442857	0.428571	17812	tags=67%, list=32%, signal=46%	COL4A2/SDC3/VTN/LAMC3/COL1A2/ITGA2/ITGB1/ITGB5/GP9/COL5A2/COL6A1/ITGA4/COL3A1/ITGA11/FN1/ITGB8/ITGAV/COL5A1/COL6A2/CHAD/GP5/LAMC1/COL11A2/THBS2/HSPG2/LAMB2/COL6A3/VWF/THBS1/THBS3/SDC2/ITGA5/ITGB6/COMP/LAMA4/ITGA1/GP1BA/LAMB4/SV2A/TNC/ITGA9/ITGA7/ITGA8/CD36/ITGA10/ITGB3/TNXB/LAMA2/COL4A4/THBS4/SV2B/TNR/COL4A6/TNN/RELN/SV2C
KEGG_FOCAL_ADHESION	KEGG_FOCAL_ADHESION	199	-0.428128	-1.61358	0.0285714	0.442857	0.428571	17812	tags=46%, list=32%, signal=32%	COL4A2/PTEN/EGFR/VTN/RAP1A/LAMC3/COL1A2/PIP5K1C/ITGA2/ITGB1/ITGB5/COL5A2/TLN1/PIK3CA/FLT4/COL6A1/SOS2/ITGA4/COL3A1/DOCK1/ITGA11/FN1/ITGB8/KDR/ITGAV/COL5A1/PDGFRB/RASGRF1/COL6A2/CHAD/ACTN1/LAMC1/COL11A2/PIK3R1/PRKCA/THBS2/PIK3CG/PPP1R12A/LAMB2/COL6A3/VCL/IGF1R/VWF/FLNA/ILK/THBS1/PDGFD/THBS3/PARVA/VEGFC/CCND2/ITGA5/MYL9/ITGB6/COMP/LAMA4/PDGFC/ITGA1/BCL2/CAV2/LAMB4/CAV1/CAV3/PDGFRA/PRKCB/TNC/SHC2/PA…
KEGG_HYPERTROPHIC_CARDIOMYOPATHY_HCM	KEGG_HYPERTROPHIC_CARDIOMYOPATHY_HCM	83	-0.484176	-1.54208	0.0294118	0.442857	0.428571	6573	tags=31%, list=12%, signal=28%	CACNB4/SGCG/CACNG1/TGFB2/TGFB3/SLC8A1/ITGA9/DES/CACNG2/ITGA7/RYR2/ITGA8/ITGA10/ITGB3/CACNA2D1/LAMA2/ACTC1/SGCD/DMD/CACNA1C/CACNA2D3/PRKAA2/CACNB2/SGCA/CACNG3/IGF1
KEGG_CALCIUM_SIGNALING_PATHWAY	KEGG_CALCIUM_SIGNALING_PATHWAY	177	-0.533511	-1.97775	0.030303	0.442857	0.428571	9716	tags=34%, list=17%, signal=28%	P2RX6/ATP2B4/PHKG1/ITPR2/CAMK4/HRH2/GNA14/HRH1/ADCY4/PDGFRA/PRKCB/EDNRA/CHRM3/P2RX1/CACNA1H/SLC8A1/ITPR1/PDE1B/PLCD4/BDKRB1/RYR2/PTGER1/DRD1/CYSLTR1/SLC8A3/MYLK/NTSR1/AVPR1A/HTR2B/ADRB2/GNAL/HTR7/HTR4/ADRA1D/PLN/PDE1A/TRPC1/TACR1/CACNA1C/PTGER3/ADRA1A/SLC8A2/PDE1C/GRPR/TACR2/CAMK2A/DRD5/PTGFR/ADCY2/P2RX2/HTR2A/CACNA1G/GRIN2A/RYR3/ADRB3/LHCGR/AGTR1/NOS1/CCKAR/CHRM2
KEGG_ARRHYTHMOGENIC_RIGHT_VENTRICULAR_CARDIOMYOPATHY_ARVC	KEGG_ARRHYTHMOGENIC_RIGHT_VENTRICULAR_CARDIOMYOPATHY_ARVC	74	-0.558172	-1.76957	0.0322581	0.442857	0.428571	6573	tags=47%, list=12%, signal=42%	LEF1/GJA1/DSC2/CACNA2D2/CACNG7/TCF7L1/ITGA5/ITGB6/CDH2/ITGA1/CACNG4/CACNB4/SGCG/CACNG1/SLC8A1/ITGA9/DES/CACNG2/ITGA7/RYR2/ITGA8/ITGA10/ITGB3/CACNA2D1/LAMA2/SGCD/DMD/CACNA1C/CACNA2D3/CACNB2/SGCA/CACNG3/ACTN2/CTNNA2/CTNNA3
KEGG_ADIPOCYTOKINE_SIGNALING_PATHWAY	KEGG_ADIPOCYTOKINE_SIGNALING_PATHWAY	67	-0.475658	-1.48293	0.0333333	0.442857	0.428571	15346	tags=34%, list=27%, signal=25%	PPARA/G6PC/AGRP/IRS1/ACSL1/PRKAB2/CPT1C/ACSL6/PRKAG2/IRS2/PPARGC1A/RXRG/LEP/ACACB/AKT3/CD36/NPY/LEPR/PRKAA2/SLC2A4/IRS4/MAPK10/ADIPOQ
KEGG_NEUROACTIVE_LIGAND_RECEPTOR_INTERACTION	KEGG_NEUROACTIVE_LIGAND_RECEPTOR_INTERACTION	271	-0.370744	-1.44616	0.0344828	0.442857	0.428571	5068	tags=25%, list=9%, signal=23%	S1PR3/NPY2R/P2RY4/BDKRB1/PTGER1/MC2R/MC5R/DRD1/CYSLTR1/TSHB/LPAR1/P2RY14/GABRE/GRIA4/AVPR2/GABRG1/HCRTR1/GLP1R/NTSR1/AVPR1A/HTR2B/GRM6/PRLHR/NPBWR1/CNR2/ADRB2/PTH1R/CHRNA2/HTR7/HTR4/HRH4/ADRA1D/GRIA3/CNR1/LEPR/LPAR4/NMBR/TACR1/NPY1R/GLRB/GABRA5/PTGER3/GRIA2/ADRA1A/GRID1/GHR/GRIA1/GRPR/TACR2/DRD5/PTGFR/P2RX2/GRIK5/HTR2A/CTSG/NPY5R/VIPR2/GLP2R/GALR1/CHRNA3/GRIN2A/ADRB3/LHCGR/AGTR1/ADCYAP1R1/MLNR/GR…
KEGG_MAPK_SIGNALING_PATHWAY	KEGG_MAPK_SIGNALING_PATHWAY	267	-0.347109	-1.34247	0.0357143	0.442857	0.428571	8515	tags=17%, list=15%, signal=15%	IL1R1/MAP3K12/CACNG4/MRAS/RASGRF2/PDGFRA/PRKCB/MEF2C/HSPA2/CACNB4/FGF16/IL1A/CACNA1H/CACNG1/TGFB2/FGFR1/TGFB3/AKT3/RASGRP4/CACNG2/EGF/NFATC4/NTF3/RASGRP2/PLA2G5/FGF1/FLNC/CACNA2D1/NGF/NTRK2/MAPT/FGF14/FGF7/FGF13/CACNA1C/CACNA2D3/CACNB2/PTPN5/CACNG3/MAPK10/FGF2/CACNA1G/RPS6KA6/PLA2G2C/FGF5/FGF10
TGCT
ID	Description	setSize	enrichmentScore	NES	pvalue	p.adjust	qvalues	rank	leading_edge	core_enrichment
KEGG_OXIDATIVE_PHOSPHORYLATION	KEGG_OXIDATIVE_PHOSPHORYLATION	131	0.587819	1.48145	0.0208333	1	1	33	tags=1%, list=0%, signal=1%	COX6CP3
THCA
ID	Description	setSize	enrichmentScore	NES	pvalue	p.adjust	qvalues	rank	leading_edge	core_enrichment
KEGG_INTESTINAL_IMMUNE_NETWORK_FOR_IGA_PRODUCTION	KEGG_INTESTINAL_IMMUNE_NETWORK_FOR_IGA_PRODUCTION	46	0.615729	1.52405	0.02	1	1	17038	tags=76%, list=30%, signal=53%	CCR9/TNFRSF17/TNFRSF13B/TNFRSF13C/HLA-DOB/CCL27/IL2/AICDA/ICOS/CD40LG/HLA-DOA/HLA-DQA2/CCL25/CD28/ICOSLG/CD86/TNFSF13B/ITGB7/HLA-DQA1/CCR10/IL15RA/CD80/HLA-DPA1/CD40/HLA-DRB5/HLA-DQB1/HLA-DPB1/HLA-DMA/PIGR/HLA-DRB1/MAP3K14/HLA-DRA/TGFB1/IL15/ITGA4
THYM
ID	Description	setSize	enrichmentScore	NES	pvalue	p.adjust	qvalues	rank	leading_edge	core_enrichment
KEGG_OLFACTORY_TRANSDUCTION	KEGG_OLFACTORY_TRANSDUCTION	383	-0.494607	-1.28855	0.029703	1	1	7149	tags=29%, list=13%, signal=25%	OR51I2/OR56B4/PRKACG/OR2A42/CAMK2A/OR1G1/OR7A5/OR2L3/OR10H5/OR1I1/OR52K2/OR52N5/OR10J1/OR13C3/CNGB1/OR4C6/OR1Q1/CLCA4/OR5AN1/OR9A4/OR2A7/OR51Q1/OR2J3/OR5P3/OR2H1/OR1E2/OR1F1/OR5P2/OR2T33/OR10AG1/OR1N1/OR52W1/OR51B2/OR2A4/OR13H1/OR10A3/OR51B4/OR10G4/OR2A12/OR2M4/OR7C1/OR9K2/OR2T4/OR56A3/OR1J2/OR14I1/OR1L3/OR11A1/OR1J4/OR13C9/OR52E4/OR12D2/OR5M11/OR7G3/OR2A25/OR52L1/OR52E6/OR5V1/OR56A5/OR9Q2/OR10C1…
UCEC
ID	Description	setSize	enrichmentScore	NES	pvalue	p.adjust	qvalues	rank	leading_edge	core_enrichment
KEGG_PENTOSE_AND_GLUCURONATE_INTERCONVERSIONS	KEGG_PENTOSE_AND_GLUCURONATE_INTERCONVERSIONS	28	-0.57557	-1.56909	0.03125	0.984127	0.984127	3540	tags=29%, list=6%, signal=27%	UGT1A4/UGT1A10/UGT2B4/UGT1A5/UGT1A6/UGT1A3/UGT1A8/UGT1A1
KEGG_FATTY_ACID_METABOLISM	KEGG_FATTY_ACID_METABOLISM	42	-0.495326	-1.40424	0.0384615	0.984127	0.984127	6810	tags=17%, list=12%, signal=15%	ACADL/ADH1C/ADH1A/ADH7/ADH4/ADH1B/ADH6
KEGG_PRION_DISEASES	KEGG_PRION_DISEASES	35	-0.57059	-1.63755	0.0384615	0.984127	0.984127	8296	tags=17%, list=15%, signal=15%	IL6/IL1A/C7/C8A/C8B/C6
KEGG_TYROSINE_METABOLISM	KEGG_TYROSINE_METABOLISM	42	-0.490826	-1.39148	0.0384615	0.984127	0.984127	8901	tags=33%, list=16%, signal=28%	ALDH3A1/MAOB/TAT/AOX1/ADH1C/ALDH1A3/HGD/ADH1A/ADH7/ADH4/DBH/ADH1B/TYR/ADH6
KEGG_PORPHYRIN_AND_CHLOROPHYLL_METABOLISM	KEGG_PORPHYRIN_AND_CHLOROPHYLL_METABOLISM	41	-0.567438	-1.60256	0.04	0.984127	0.984127	3540	tags=20%, list=6%, signal=18%	UGT1A4/UGT1A10/UGT2B4/UGT1A5/UGT1A6/UGT1A3/UGT1A8/UGT1A1
KEGG_COMPLEMENT_AND_COAGULATION_CASCADES	KEGG_COMPLEMENT_AND_COAGULATION_CASCADES	69	-0.508647	-1.51759	0.0454545	0.984127	0.984127	12899	tags=41%, list=23%, signal=31%	VWF/F10/CFI/C5AR1/KLKB1/F7/C3/THBD/PROC/C4A/C4B/FGB/CFH/FGA/F5/C7/SERPINA1/F13A1/SERPINA5/CR1/MASP1/C4BPB/C4BPA/C8A/PLG/C8B/SERPIND1/C6
KEGG_METABOLISM_OF_XENOBIOTICS_BY_CYTOCHROME_P450	KEGG_METABOLISM_OF_XENOBIOTICS_BY_CYTOCHROME_P450	69	-0.542692	-1.61916	0.0454545	0.984127	0.984127	6734	tags=33%, list=12%, signal=29%	CYP3A5/AKR1C3/ADH1C/GSTM5/ALDH1A3/AKR1C1/ADH1A/CYP2C19/AKR1C2/UGT1A4/ADH7/ADH4/UGT1A10/UGT2B4/ADH1B/AKR1C4/ADH6/UGT1A5/GSTA3/UGT1A6/UGT1A3/UGT1A8/UGT1A1
KEGG_DRUG_METABOLISM_CYTOCHROME_P450	KEGG_DRUG_METABOLISM_CYTOCHROME_P450	71	-0.511796	-1.50224	0.047619	0.984127	0.984127	9473	tags=38%, list=17%, signal=32%	CYP3A7/GSTA5/ALDH3A1/MAOB/FMO5/UGT2B15/AOX1/CYP3A5/ADH1C/GSTM5/ALDH1A3/ADH1A/CYP2C19/UGT1A4/ADH7/ADH4/UGT1A10/UGT2B4/ADH1B/FMO2/ADH6/UGT1A5/GSTA3/UGT1A6/UGT1A3/UGT1A8/UGT1A1
UVM
ID	Description	setSize	enrichmentScore	NES	pvalue	p.adjust	qvalues	rank	leading_edge	core_enrichment
KEGG_CYTOKINE_CYTOKINE_RECEPTOR_INTERACTION	KEGG_CYTOKINE_CYTOKINE_RECEPTOR_INTERACTION	264	0.519652	1.28532	0.015873	0.558559	0.556346	12538	tags=38%, list=22%, signal=29%	CCL27/IL22/IFNA2/IL20/CXCR5/IL21/GH2/CCL11/IFNA5/CCR6/CCL1/PPBP/CCR8/CXCL13/IL12B/CSF2/PF4/CCL15/TNFRSF13B/CCR4/IFNA21/EDAR/LEP/IFNG/TNFRSF17/TNFRSF8/IL19/TNFSF14/CCR7/TNFRSF9/IL10/FASLG/IL2/XCR1/XCL2/FLT3/IL9R/CXCL11/IL22RA2/AMHR2/IL7R/IFNE/IL21R/CCL22/IL12RB2/IL2RA/XCL1/TNF/CD40LG/INHBA/LTA/CCL8/CXCR6/CCL21/TNFSF18/CXCL10/CXCL9/IL24/CCL25/IFNB1/CSF2RB/BMP2/GHR/IFNL2/TNFRSF11B/IFNW1/IL4/CXCL1/IL…
KEGG_RNA_POLYMERASE	KEGG_RNA_POLYMERASE	28	0.781617	1.47965	0.0185185	0.558559	0.556346	2032	tags=4%, list=4%, signal=3%	POLR2J2
KEGG_DRUG_METABOLISM_CYTOCHROME_P450	KEGG_DRUG_METABOLISM_CYTOCHROME_P450	71	-0.626723	-1.44806	0.0196078	0.558559	0.556346	5150	tags=20%, list=9%, signal=18%	ADH4/UGT2A1/ADH7/CYP2C18/UGT1A10/CYP2A13/UGT1A3/CYP2C19/UGT2B28/UGT1A9/UGT1A1/UGT1A6/UGT2B10/UGT2B4
KEGG_LONG_TERM_DEPRESSION	KEGG_LONG_TERM_DEPRESSION	70	-0.672821	-1.53865	0.0196078	0.558559	0.556346	9131	tags=26%, list=16%, signal=22%	GNAZ/PLCB1/PLA2G2A/CRHR1/GRIA1/PLA2G2E/PLA2G3/PRKCG/GRIA2/PLA2G12B/GRM1/GRID2/GRIA3/NOS1/CRH/GRM5/PLA2G2F/PPP1R17
KEGG_METABOLISM_OF_XENOBIOTICS_BY_CYTOCHROME_P450	KEGG_METABOLISM_OF_XENOBIOTICS_BY_CYTOCHROME_P450	69	-0.619706	-1.40743	0.0196078	0.558559	0.556346	5150	tags=19%, list=9%, signal=17%	ADH4/UGT2A1/ADH7/CYP2C18/UGT1A10/UGT1A3/CYP2C19/UGT2B28/UGT1A9/UGT1A1/UGT1A6/UGT2B10/UGT2B4
KEGG_RETINOL_METABOLISM	KEGG_RETINOL_METABOLISM	64	-0.64422	-1.43907	0.0217391	0.558559	0.556346	5847	tags=28%, list=10%, signal=25%	CYP4A11/BCO1/ADH4/UGT2A1/RPE65/ADH7/CYP2C18/CYP4A22/UGT1A10/CYP2A13/UGT1A3/CYP2C19/UGT2B28/UGT1A9/UGT1A1/UGT1A6/UGT2B10/UGT2B4
KEGG_CARDIAC_MUSCLE_CONTRACTION	KEGG_CARDIAC_MUSCLE_CONTRACTION	78	-0.613131	-1.3829	0.0227273	0.558559	0.556346	12840	tags=41%, list=23%, signal=32%	CACNA1C/COX4I2/ATP1B1/TNNC1/CACNG6/CACNA1D/CACNB1/ATP1B2/TNNI3/COX7A1/MYL2/ATP1A2/CACNA2D4/CACNB4/CACNA1F/CACNB2/COX6CP3/ATP1A3/ATP1A4/CACNG4/CACNA2D3/TNNT2/RYR2/CACNG8/CACNG3/ATP1B4/CACNG7/CACNG5/CACNA1S/ACTC1/CACNG2/COX7B2
KEGG_CALCIUM_SIGNALING_PATHWAY	KEGG_CALCIUM_SIGNALING_PATHWAY	177	-0.523119	-1.32808	0.025	0.558559	0.556346	13099	tags=40%, list=23%, signal=31%	PTGFR/HRH2/HTR2B/CACNA1H/CACNA1C/PTGER3/ADCY1/PLCD4/CACNA1B/TNNC1/P2RX2/MYLK2/TRPC1/LHCGR/PLCB4/GRPR/CACNA1D/CAMK2A/CACNA1A/ITPKA/GRIN2C/PDE1A/TNNC2/AGTR1/GRIN2D/HTR4/PDGFRA/SLC8A2/PDE1B/P2RX6/CAMK2B/HTR7/CACNA1F/PLCB1/OXTR/GNA14/CHRNA7/CCKBR/ERBB4/ATP2B3/ADRA1A/AVPR1B/TACR1/CACNA1E/ADRB3/PDE1C/PLN/CALML3/RYR2/ADRB1/PRKACG/PRKCG/TRHR/GRM1/DRD5/ATP2B2/GRIN1/CACNA1I/ADCY8/DRD1/CACNA1S/HTR2A/CACNA1G…
KEGG_NEUROACTIVE_LIGAND_RECEPTOR_INTERACTION	KEGG_NEUROACTIVE_LIGAND_RECEPTOR_INTERACTION	271	-0.522397	-1.3382	0.027027	0.558559	0.556346	10073	tags=43%, list=18%, signal=35%	GRIN3B/AGTR1/GRIN2D/NMUR1/HTR4/VIPR1/PTGER4/GRIK4/PRL/ADRA2A/DRD4/P2RY1/P2RX6/HTR7/P2RY2/NTSR2/GRM2/GABRR2/GH1/GIPR/OXTR/CHRM4/GRIK5/GABBR2/CHRNA7/CCKBR/CRHR1/PRSS3/CNR1/GRID1/CRHR2/ADRA1A/SCTR/SSTR4/GCGR/F2RL2/GABRA4/NPFFR1/DRD2/AVPR1B/NPFFR2/HTR1B/NPY1R/GHRHR/TACR1/CHRNA3/GLRB/SSTR1/GRIA1/KISS1R/ADRB3/CHRNB4/GRM6/GRIK1/CHRNA6/GLP2R/CGA/MCHR1/NPY5R/RXFP2/ADRB1/GABRA3/CTSG/ADCYAP1R1/THRB/CHRNA4/M…
KEGG_DRUG_METABOLISM_OTHER_ENZYMES	KEGG_DRUG_METABOLISM_OTHER_ENZYMES	51	-0.678406	-1.43969	0.0465116	0.815789	0.812558	2968	tags=24%, list=5%, signal=22%	UGT2A1/UPP2/UGT1A10/CES5A/CYP2A13/UGT1A3/UGT2B28/UGT1A9/UGT1A1/UGT1A6/UGT2B10/UGT2B4
